# Supplementary material for: Alkylaminophenol Induces G1/S Phase Cell Cycle Arrest in Glioblastoma Cells Through p53 and Cyclin-Dependent Kinase Signaling Pathway
Source: Front Pharmacol. 2019 Apr 2;10:330. doi: 10.3389/fphar.2019.00330 (PMC6454069; doi:10.3389/fphar.2019.00330)
Supplement: Supplementary file 1 [file Table_1.XLSX]

## Sheet: LN229 - C1 - Table S1
Supplementary Table S1. The list shows the genes that were differentially expressed in THTMP vs Untreated in the cell type analysis using DESeq2
ENSEMBL	ENTREZID	SYMBOL	GENENAME	baseMean	log2FoldChange	padj
ENSG00000161091	126321	MFSD12	major facilitator superfamily domain containing 12	5510.85939225075	0.404745282538573	2.99658768084677e-19
ENSG00000117318	3399	ID3	inhibitor of DNA binding 3, HLH protein	665.775121633302	-0.782979375846525	8.83971235217513e-19
ENSG00000136235	10457	GPNMB	glycoprotein nmb	3926.61232322921	0.427533606758433	9.76400040811229e-16
ENSG00000178209	5339	PLEC	plectin	7362.15006277836	0.573433113588386	9.76400040811229e-16
ENSG00000105519	828	CAPS	calcyphosine	527.098745844261	-0.802468785961865	1.41951314377476e-15
ENSG00000163235	7039	TGFA	transforming growth factor alpha	2668.29035306519	-0.480235207619587	1.35408398187392e-14
ENSG00000088325	22974	TPX2	TPX2, microtubule nucleation factor	3355.38675160941	-0.36633483100213	4.93897719638248e-14
ENSG00000103257	8140	SLC7A5	solute carrier family 7 member 5	7976.64732543239	0.367532212151594	4.93897719638248e-14
ENSG00000177606	3725	JUN	Jun proto-oncogene, AP-1 transcription factor subunit	2267.04795824619	0.556422627980879	1.24559783744524e-13
ENSG00000115461	3488	IGFBP5	insulin like growth factor binding protein 5	559.192573252506	-0.690928156003999	1.04700827605963e-12
ENSG00000113161	3156	HMGCR	3-hydroxy-3-methylglutaryl-CoA reductase	3689.64152112041	-0.329421457999941	1.81770757376103e-11
ENSG00000141574	6398	SECTM1	secreted and transmembrane 1	689.387973681935	0.604517592189991	1.81770757376103e-11
ENSG00000124225	56937	PMEPA1	prostate transmembrane protein, androgen induced 1	6634.26312436949	-0.302313060484087	1.83639255599483e-11
ENSG00000181019	1728	NQO1	NAD(P)H quinone dehydrogenase 1	9626.27557775588	0.311379369941326	1.06613146589529e-10
ENSG00000117152	5999	RGS4	regulator of G-protein signaling 4	294.587849004823	-0.814830913733053	1.15805848641804e-10
ENSG00000141564	57521	RPTOR	regulatory associated protein of MTOR complex 1	1732.00870149101	0.431981220636355	1.15805848641804e-10
ENSG00000171617	8507	ENC1	ectodermal-neural cortex 1	1080.94132741861	-0.469048455935796	1.28958556145833e-10
ENSG00000135919	5270	SERPINE2	serpin family E member 2	18168.9640566796	-0.27274772855541	2.07285343069352e-10
ENSG00000170540	23204	ARL6IP1	ADP ribosylation factor like GTPase 6 interacting protein 1	2376.14586050168	-0.463908757690102	3.1383548299929e-10
ENSG00000131747	7153	TOP2A	topoisomerase (DNA) II alpha	4550.18028013502	-0.291576253670887	7.47514553427979e-10
ENSG00000136826	9314	KLF4	Kruppel like factor 4	210.960074050985	0.95605966056129	1.25392948789711e-09
ENSG00000117632	3925	STMN1	stathmin 1	4035.70668276346	-0.313352172639699	1.79091630036625e-09
ENSG00000112984	10112	KIF20A	kinesin family member 20A	1654.26021898713	-0.399076207208676	1.82196063995166e-09
ENSG00000003249	79007	DBNDD1	dysbindin domain containing 1	492.704777196081	-0.612268358253403	2.22366608160643e-09
ENSG00000161800	29127	RACGAP1	Rac GTPase activating protein 1	1422.66312929665	-0.382977545272441	3.12972483792353e-09
ENSG00000115902	6509	SLC1A4	solute carrier family 1 member 4	5813.89072130966	0.282152231662636	3.14266888080031e-09
ENSG00000145860	153830	RNF145	ring finger protein 145	1674.32464548022	-0.391522751289233	4.19016985974746e-09
ENSG00000125968	3397	ID1	inhibitor of DNA binding 1, HLH protein	818.470515323062	-0.469597891002311	6.60919594186983e-09
ENSG00000102804	8848	TSC22D1	TSC22 domain family member 1	1696.05502034159	-0.382748397390577	1.63379437442711e-08
ENSG00000072274	7037	TFRC	transferrin receptor	2707.93110834764	-0.337698685526286	5.8450864563338e-08
ENSG00000026025	7431	VIM	vimentin	11283.8067925928	-0.282643995610636	6.32813169377212e-08
ENSG00000135046	301	ANXA1	annexin A1	2001.7015808137	-0.338036038564351	6.34212927583079e-08
ENSG00000182718	302	ANXA2	annexin A2	8548.42691422579	-0.322014323607843	1.09896204752074e-07
ENSG00000134333	3939	LDHA	lactate dehydrogenase A	15035.798881825	-0.271181973775523	1.74266448908337e-07
ENSG00000185022	23764	MAFF	MAF bZIP transcription factor F	361.439044592313	0.620436937517596	1.74266448908337e-07
ENSG00000148848	8038	ADAM12	ADAM metallopeptidase domain 12	1250.88234788808	0.410126937266267	2.28075384809898e-07
ENSG00000167996	2495	FTH1	ferritin heavy chain 1	1329.54369230892	0.432642682204786	2.28075384809898e-07
ENSG00000168003	6520	SLC3A2	solute carrier family 3 member 2	3593.01619979337	0.272233578120191	2.80614753816363e-07
ENSG00000075223	10512	SEMA3C	semaphorin 3C	2640.84069928973	-0.348592912776998	3.08535077370558e-07
ENSG00000172037	3913	LAMB2	laminin subunit beta 2	1546.86102410128	0.427839002500781	3.13254620300763e-07
ENSG00000124942	79026	AHNAK	AHNAK nucleoprotein	3740.91332396984	0.415954541334034	3.94216778876511e-07
ENSG00000145386	890	CCNA2	cyclin A2	981.207824148751	-0.417324734068972	3.94216778876511e-07
ENSG00000134057	891	CCNB1	cyclin B1	2096.61599956173	-0.328889905033814	3.98767865873475e-07
ENSG00000126787	9787	DLGAP5	DLG associated protein 5	762.338991385907	-0.468136940568589	4.52815894000015e-07
ENSG00000087086	2512	FTL	ferritin light chain	6162.69022336904	0.352046437055966	8.53198119654865e-07
ENSG00000169679	699	BUB1	BUB1 mitotic checkpoint serine/threonine kinase	944.066723345172	-0.385270129263172	9.25330431187918e-07
ENSG00000176438	161176	SYNE3	spectrin repeat containing nuclear envelope family member 3	882.921039029737	0.430992973189759	2.29134233565843e-06
ENSG00000123384	4035	LRP1	LDL receptor related protein 1	969.241406272152	0.502120120313757	2.95867270751008e-06
ENSG00000169764	7360	UGP2	UDP-glucose pyrophosphorylase 2	1241.71337371185	-0.420121767021734	3.17673557722055e-06
ENSG00000197852	55924	FAM212B	family with sequence similarity 212 member B	1627.57775012922	0.33695415293173	3.80859531325741e-06
ENSG00000115380	2202	EFEMP1	EGF containing fibulin like extracellular matrix protein 1	920.566936228041	-0.387376571545958	3.86223845765731e-06
ENSG00000158710	8407	TAGLN2	transgelin 2	3922.34646504556	-0.276222337394605	3.86223845765731e-06
ENSG00000198563	7919	DDX39B	DExD-box helicase 39B	366.641488470244	0.752376921230882	3.86223845765731e-06
ENSG00000184557	9021	SOCS3	suppressor of cytokine signaling 3	240.064889163322	0.711530153922212	4.27845137128724e-06
ENSG00000101187	28231	SLCO4A1	solute carrier organic anion transporter family member 4A1	259.837645112044	0.665167260587935	4.58351616033781e-06
ENSG00000124098	116151	FAM210B	family with sequence similarity 210 member B	486.077976865707	-0.501210232300306	4.64135813853763e-06
ENSG00000137804	51203	NUSAP1	nucleolar and spindle associated protein 1	2083.21619573206	-0.290012787448425	7.99346971306106e-06
ENSG00000125945	80818	ZNF436	zinc finger protein 436	500.612960785549	-0.472326240317425	8.20679626718263e-06
ENSG00000146830	64599	GIGYF1	GRB10 interacting GYF protein 1	498.866012373294	0.700303917541004	8.24632127109005e-06
ENSG00000128656	1123	CHN1	chimerin 1	1552.74180142132	-0.294837859192705	9.1317475173747e-06
ENSG00000164880	26173	INTS1	integrator complex subunit 1	1458.8784148151	0.313357780411976	9.14819928838592e-06
ENSG00000185634	399694	SHC4	SHC adaptor protein 4	290.297843997737	-0.600426964522288	9.45469326504564e-06
ENSG00000158008	2134	EXTL1	exostosin like glycosyltransferase 1	3322.49185189401	0.258129851559697	9.88618212910289e-06
ENSG00000100644	3091	HIF1A	hypoxia inducible factor 1 alpha subunit	3095.76406003577	-0.283223553781486	1.15476462652461e-05
ENSG00000196419	2547	XRCC6	X-ray repair cross complementing 6	3603.80658709509	-0.249410344173906	1.24938802473828e-05
ENSG00000163932	5580	PRKCD	protein kinase C delta	2182.90235468043	0.270752118085437	1.52529580478603e-05
ENSG00000138778	1062	CENPE	centromere protein E	995.468637717226	-0.367139769253192	1.57011814408384e-05
ENSG00000155893	92370	PXYLP1	2-phosphoxylose phosphatase 1	606.529416737033	-0.458582997902155	1.9811982063564e-05
ENSG00000141577	22994	CEP131	centrosomal protein 131	457.886564765804	0.475455025227222	2.00959039215565e-05
ENSG00000163535	151246	SGO2	shugoshin 2	845.808507101501	-0.413428523224208	3.07496739390047e-05
ENSG00000164434	2173	FABP7	fatty acid binding protein 7	844.032217397149	-0.364054112594223	3.17071310960297e-05
ENSG00000162607	7398	USP1	ubiquitin specific peptidase 1	1711.83324752032	-0.32578342462289	3.23826201634466e-05
ENSG00000136108	26586	CKAP2	cytoskeleton associated protein 2	796.018849659955	-0.382295035707873	3.70797716636149e-05
ENSG00000158856	2039	DMTN	dematin actin binding protein	241.306700831051	0.614494322339378	3.83135095438671e-05
ENSG00000198901	9055	PRC1	protein regulator of cytokinesis 1	2004.15450374571	-0.267786526812746	5.48896175576357e-05
ENSG00000134531	2012	EMP1	epithelial membrane protein 1	1357.1439308107	-0.333952232230093	5.55331879654963e-05
ENSG00000131584	116983	ACAP3	ArfGAP with coiled-coil, ankyrin repeat and PH domains 3	423.034686389874	0.545539195076921	5.74661592519251e-05
ENSG00000167548	8085	KMT2D	lysine methyltransferase 2D	668.174845518914	0.549429582671414	5.74661592519251e-05
ENSG00000127418	53834	FGFRL1	fibroblast growth factor receptor-like 1	1440.17768056001	-0.30547299010696	6.35888884455152e-05
ENSG00000170017	214	ALCAM	activated leukocyte cell adhesion molecule	729.420314363845	-0.378490830939003	6.50670237045397e-05
ENSG00000161996	197335	WDR90	WD repeat domain 90	311.404508690906	0.681952311140377	7.20906067852192e-05
ENSG00000011426	54443	ANLN	anillin actin binding protein	3710.6758254447	-0.241309503420824	7.72541819352424e-05
ENSG00000136111	9882	TBC1D4	TBC1 domain family member 4	437.86258216672	0.470985948182189	7.72541819352424e-05
ENSG00000168502	23255	MTCL1	microtubule crosslinking factor 1	540.038340054956	0.462433139258586	8.03666519494565e-05
ENSG00000120802	7112	TMPO	thymopoietin	2157.03211205475	-0.3444381375032	8.51412813103069e-05
ENSG00000175063	11065	UBE2C	ubiquitin conjugating enzyme E2 C	1190.75438415546	-0.297573964887856	9.27770396780899e-05
ENSG00000120129	1843	DUSP1	dual specificity phosphatase 1	260.195178702594	0.616586277533687	9.4399174836231e-05
ENSG00000145632	10769	PLK2	polo like kinase 2	1626.99256378515	-0.29483766974568	9.71546398457843e-05
ENSG00000173546	1464	CSPG4	chondroitin sulfate proteoglycan 4	4201.66935212399	0.255073399857832	9.92858027306417e-05
ENSG00000101447	81610	FAM83D	family with sequence similarity 83 member D	990.579859149022	-0.329646085931878	0.000101878087386853
ENSG00000072571	3161	HMMR	hyaluronan mediated motility receptor	464.041140979644	-0.479627584614758	0.000105583258095432
ENSG00000081189	4208	MEF2C	myocyte enhancer factor 2C	477.325461532687	-0.454261290390244	0.000105583258095432
ENSG00000171241	79801	SHCBP1	SHC binding and spindle associated 1	1227.07576652627	-0.328009649297515	0.000105583258095432
ENSG00000214655	23053	ZSWIM8	zinc finger SWIM-type containing 8	420.070338709514	0.503398008549719	0.000109181220051907
ENSG00000172216	1051	CEBPB	CCAAT/enhancer binding protein beta	379.15473669706	0.509834860292806	0.000130786114462767
ENSG00000071991	28513	CDH19	cadherin 19	931.296469475648	-0.382482201922798	0.000131267040387903
ENSG00000026508	960	CD44	CD44 molecule (Indian blood group)	5519.7308733996	-0.204613954986664	0.000140774885875654
ENSG00000182325	26233	FBXL6	F-box and leucine rich repeat protein 6	132.526269091726	0.821577549425364	0.000141201108801141
ENSG00000187098	4286	MITF	melanogenesis associated transcription factor	541.899291973122	-0.433274962649566	0.000147282659664979
ENSG00000143603	3782	KCNN3	potassium calcium-activated channel subfamily N member 3	430.071647105374	0.474823369649184	0.000149439914947373
ENSG00000090006	8425	LTBP4	latent transforming growth factor beta binding protein 4	545.152806237944	0.437594681859909	0.000150468968192026
ENSG00000164220	2151	F2RL2	coagulation factor II thrombin receptor like 2	483.789031700754	0.422700701713758	0.00015091506347549
ENSG00000242808	347689	SOX2-OT	SOX2 overlapping transcript	98.9391063941087	-0.8972553731207	0.000152798303490238
ENSG00000169718	64118	DUS1L	dihydrouridine synthase 1 like	967.638191150876	0.332403211937238	0.000170027593365862
ENSG00000182481	3838	KPNA2	karyopherin subunit alpha 2	3335.78348649489	-0.227110355296418	0.00017169156633191
ENSG00000157456	9133	CCNB2	cyclin B2	716.708634335456	-0.349761939065553	0.000181874692193718
ENSG00000244879	100616396	MIR4712	microRNA 4712	195.579124598388	0.803825996799367	0.000183104328019029
ENSG00000091409	3655	ITGA6	integrin subunit alpha 6	4275.53240527726	-0.234709484932521	0.000183733726764503
ENSG00000013573	1663	DDX11	DEAD/H-box helicase 11	288.874550219855	0.625977424492484	0.000192508375498584
ENSG00000126562	65266	WNK4	WNK lysine deficient protein kinase 4	271.614535903723	0.635164599998768	0.000198027784661745
ENSG00000116133	1718	DHCR24	24-dehydrocholesterol reductase	3923.67617417324	-0.2512580125721	0.000208783246784946
ENSG00000010295	25900	IFFO1	intermediate filament family orphan 1	326.67312257353	0.567471930289192	0.000213063422595903
ENSG00000111669	7167	TPI1	triosephosphate isomerase 1	5483.7257831352	-0.201175006577863	0.000214836641651979
ENSG00000129566	7011	TEP1	telomerase associated protein 1	305.534045734565	0.577619888386526	0.000214836641651979
ENSG00000166341	8642	DCHS1	dachsous cadherin-related 1	297.235434371369	0.563847718207104	0.00021536757382003
ENSG00000159200	1827	RCAN1	regulator of calcineurin 1	3426.3002929002	-0.247671465977163	0.000233544902466068
ENSG00000234741	60674	GAS5	growth arrest specific 5 (non-protein coding)	594.75980071471	0.46952898691396	0.000235938383702922
ENSG00000153029	3140	MR1	major histocompatibility complex, class I-related	123.677895958581	-0.814315609704094	0.000237359202706576
ENSG00000198826	9824	ARHGAP11A	Rho GTPase activating protein 11A	1212.31417385049	-0.284770450047846	0.000246992641442491
ENSG00000161011	8878	SQSTM1	sequestosome 1	1609.33110982592	0.276854803556776	0.000259314499192269
ENSG00000123094	11228	RASSF8	Ras association domain family member 8	1436.61725695334	-0.272906194935506	0.00031846934855501
ENSG00000229117	6171	RPL41	ribosomal protein L41	275.187417552918	0.540539853619187	0.00031846934855501
ENSG00000265972	10628	TXNIP	thioredoxin interacting protein	1042.408604828	-0.31471513293807	0.00031846934855501
ENSG00000087245	4313	MMP2	matrix metallopeptidase 2	20645.66989392	0.179573487577663	0.000342859291439847
ENSG00000113369	57561	ARRDC3	arrestin domain containing 3	472.02610235554	-0.417426894753674	0.000355678791269785
ENSG00000165029	19	ABCA1	ATP binding cassette subfamily A member 1	234.332615433279	-0.56540722668317	0.000387909466092776
ENSG00000102024	5358	PLS3	plastin 3	1409.82154312135	-0.285347513881855	0.000425488571429237
ENSG00000145685	10184	LHFPL2	lipoma HMGIC fusion partner-like 2	696.548678287847	-0.333797097502441	0.000426403388859506
ENSG00000100422	64781	CERK	ceramide kinase	921.39241981158	-0.317050267831713	0.000434664334226865
ENSG00000154380	55740	ENAH	enabled homolog (Drosophila)	2891.00710334983	-0.248956654901837	0.000434852450114603
ENSG00000087586	6790	AURKA	aurora kinase A	1082.34084435189	-0.309969065915294	0.000439496771430849
ENSG00000175130	65108	MARCKSL1	MARCKS like 1	5628.77273657611	0.194378959938811	0.000439496771430849
ENSG00000156802	29028	ATAD2	ATPase family, AAA domain containing 2	1955.35292579496	-0.269532075056194	0.000480036327468454
ENSG00000173821	57674	RNF213	ring finger protein 213	1554.22918955353	0.325412041225494	0.00048051584690168
ENSG00000168615	8754	ADAM9	ADAM metallopeptidase domain 9	2315.40561894245	-0.261834677737679	0.000495022673737518
ENSG00000122545	989	2007-09-01	septin 7	3464.63768916205	-0.245453905230685	0.000495097756649944
ENSG00000185324	8558	CDK10	cyclin dependent kinase 10	411.578063648612	0.582345667288971	0.000497313176043315
ENSG00000141582	8535	CBX4	chromobox 4	569.519178163372	0.368865274106744	0.00050368846617506
ENSG00000197081	3482	IGF2R	insulin like growth factor 2 receptor	1366.31761283574	0.276980038909781	0.00050368846617506
ENSG00000137807	9493	KIF23	kinesin family member 23	969.421280130036	-0.305967714608904	0.000511454966820836
ENSG00000185627	5719	PSMD13	proteasome 26S subunit, non-ATPase 13	1008.38596672992	-0.306304507659035	0.000516320393219442
ENSG00000147604	6129	RPL7	ribosomal protein L7	2546.72176581624	-0.216833461526087	0.000539965869902102
ENSG00000267519	284454	LOC284454	uncharacterized LOC284454	75.0764661740451	1.22465779243756	0.00057648284551654
ENSG00000079246	7520	XRCC5	X-ray repair cross complementing 5	4798.27331031397	-0.205856740825817	0.000607591444055266
ENSG00000162772	467	ATF3	activating transcription factor 3	116.215651928832	0.821379968849074	0.000641072617613748
ENSG00000183397	100128569	C19orf71	chromosome 19 open reading frame 71	376.889270533781	0.505029970272105	0.000641072617613748
ENSG00000166949	4088	SMAD3	SMAD family member 3	907.71945835921	0.308518442178493	0.000652464786545818
ENSG00000150093	3688	ITGB1	integrin subunit beta 1	6842.55142428884	-0.191925960255817	0.000787373134043301
ENSG00000080986	10403	NDC80	NDC80, kinetochore complex component	435.610944921571	-0.410340156050142	0.000800529121702696
ENSG00000089154	10985	GCN1	GCN1, eIF2 alpha kinase activator homolog	927.811041420284	0.336848990552462	0.000846180606369572
ENSG00000108055	9126	SMC3	structural maintenance of chromosomes 3	1546.75195865374	-0.263936861150702	0.000874842076639047
ENSG00000184381	8398	PLA2G6	phospholipase A2 group VI	90.2039853075913	0.958325092600133	0.000874842076639047
ENSG00000155304	6782	HSPA13	heat shock protein family A (Hsp70) member 13	969.625537614342	-0.324911746107796	0.000874976873554261
ENSG00000164535	221955	DAGLB	diacylglycerol lipase beta	225.25094768096	0.546692781056693	0.000945952616449361
ENSG00000145730	5066	PAM	peptidylglycine alpha-amidating monooxygenase	2909.27252305678	-0.192992200314876	0.000958790613658918
ENSG00000100364	23313	KIAA0930	KIAA0930	1381.87254867294	0.260710338258805	0.000963257793558326
ENSG00000214826	NA	NA	NA	82.2895351935122	0.972204938417094	0.000991207838932867
ENSG00000044090	9820	CUL7	cullin 7	199.385904427343	0.581394783940981	0.00099481374921598
ENSG00000182272	338707	B4GALNT4	beta-1,4-N-acetyl-galactosaminyltransferase 4	336.183132415085	0.468230307832549	0.000997075630845595
ENSG00000112742	7272	TTK	TTK protein kinase	488.994938196253	-0.423320405051852	0.00100844844477306
ENSG00000167967	1877	E4F1	E4F transcription factor 1	195.478701064402	0.595440942027558	0.00105405454599576
ENSG00000186815	53373	TPCN1	two pore segment channel 1	145.922172093902	0.740696564131995	0.00106041279942798
ENSG00000085063	966	CD59	CD59 molecule (CD59 blood group)	6669.3165654675	-0.176088551676917	0.00107012751473337
ENSG00000118680	103910	MYL12B	myosin light chain 12B	1014.00828430489	-0.293052312322245	0.0010930796474401
ENSG00000147459	80005	DOCK5	dedicator of cytokinesis 5	1231.53153374068	0.373962149503097	0.00116632560606313
ENSG00000166394	51700	CYB5R2	cytochrome b5 reductase 2	748.585705404024	-0.3324780403426	0.00121449889503423
ENSG00000138080	11117	EMILIN1	elastin microfibril interfacer 1	1936.79801541684	0.273546080748524	0.0012145846501068
ENSG00000215440	79716	NPEPL1	aminopeptidase-like 1	54.5554339391683	1.14812728907993	0.0012161398201981
ENSG00000136938	10541	ANP32B	acidic nuclear phosphoprotein 32 family member B	1616.0170487325	-0.277605211354428	0.00128593712458892
ENSG00000157873	8764	TNFRSF14	TNF receptor superfamily member 14	125.224665712186	0.746924208396793	0.00131956813182474
ENSG00000105968	94239	H2AFV	H2A histone family member V	2473.93352164095	-0.20563030794361	0.0013865713827372
ENSG00000163029	79677	SMC6	structural maintenance of chromosomes 6	608.663971537654	-0.345757557501509	0.0013865713827372
ENSG00000164104	3148	HMGB2	high mobility group box 2	1898.62637336064	-0.212681219498816	0.0013865713827372
ENSG00000164754	5885	RAD21	RAD21 cohesin complex component	1886.63527271627	-0.259215940451415	0.00155725572370417
ENSG00000146828	56996	SLC12A9	solute carrier family 12 member 9	326.062933542682	0.442564903366667	0.00165368741458462
ENSG00000102144	5230	PGK1	phosphoglycerate kinase 1	3633.77577772685	-0.201418108157325	0.00165644016247415
ENSG00000179583	4261	CIITA	class II major histocompatibility complex transactivator	689.903972215146	0.360675145133692	0.00165644016247415
ENSG00000197283	8831	SYNGAP1	synaptic Ras GTPase activating protein 1	219.279452913315	0.652832414095313	0.00165644016247415
ENSG00000108691	6347	CCL2	C-C motif chemokine ligand 2	74.688151945412	0.886681721063652	0.00173362929245755
ENSG00000179954	284297	SSC5D	scavenger receptor cysteine rich family member with 5 domains	328.003276640103	0.467457894071683	0.00173666543206489
ENSG00000120708	7045	TGFBI	transforming growth factor beta induced	2241.0245487206	-0.215591721079361	0.00173762912675869
ENSG00000100526	1033	CDKN3	cyclin dependent kinase inhibitor 3	371.286495856163	-0.424559130423978	0.00173946138599471
ENSG00000173852	23333	DPY19L1	dpy-19 like 1	2189.52490992367	-0.243682413415283	0.0017642969675932
ENSG00000183010	5831	PYCR1	pyrroline-5-carboxylate reductase 1	495.577788994855	0.382983000113371	0.00179173569219404
ENSG00000074416	11343	MGLL	monoglyceride lipase	596.542401100814	-0.332336673297568	0.0018228109463753
ENSG00000070831	998	CDC42	cell division cycle 42	1304.66696777575	-0.26852089042352	0.00184639694051466
ENSG00000117724	1063	CENPF	centromere protein F	3922.53300793433	-0.202745682324259	0.00184639694051466
ENSG00000064042	22998	LIMCH1	LIM and calponin homology domains 1	273.487213366198	-0.495208902500487	0.00189522878958363
ENSG00000198300	5178	PEG3	paternally expressed 3	395.280695451361	0.399112634237917	0.00192989805082028
ENSG00000156508	1915	EEF1A1	eukaryotic translation elongation factor 1 alpha 1	15023.8081354011	-0.179552931143604	0.00194337483808389
ENSG00000140859	3801	KIFC3	kinesin family member C3	947.482344259567	0.281357528124647	0.00198420781986723
ENSG00000140983	89941	RHOT2	ras homolog family member T2	674.252898233882	0.35984322696256	0.00198420781986723
ENSG00000170638	80305	TRABD	TraB domain containing	266.000396896483	0.51057990563318	0.00198420781986723
ENSG00000174791	9610	RIN1	Ras and Rab interactor 1	413.510361683519	0.399259768913239	0.00199753879134039
ENSG00000197102	1778	DYNC1H1	dynein cytoplasmic 1 heavy chain 1	2605.31856970035	0.300829380059057	0.00204240612495832
ENSG00000117399	991	CDC20	cell division cycle 20	1189.63427013937	-0.27001645518833	0.00208657671497441
ENSG00000168036	1499	CTNNB1	catenin beta 1	3575.02630060793	-0.178040815286104	0.00208657671497441
ENSG00000104723	7991	TUSC3	tumor suppressor candidate 3	1099.82958464076	-0.276384702574242	0.00218375741582118
ENSG00000100106	11078	TRIOBP	TRIO and F-actin binding protein	2788.53194123561	0.204321375622091	0.00222291689621952
ENSG00000164291	153642	ARSK	arylsulfatase family member K	135.694181602409	-0.69130501839122	0.00243560631419073
ENSG00000130638	25814	ATXN10	ataxin 10	956.583174364895	-0.272525575446149	0.00247189976688736
ENSG00000123560	5354	PLP1	proteolipid protein 1	2253.90512887487	-0.205262141065638	0.00256211746244907
ENSG00000119927	57678	GPAM	glycerol-3-phosphate acyltransferase, mitochondrial	364.858090026197	-0.404765563019162	0.00275315768489379
ENSG00000171163	55657	ZNF692	zinc finger protein 692	185.515857821348	0.672160196479232	0.00275315768489379
ENSG00000183853	55243	KIRREL	kin of IRRE like (Drosophila)	3441.60572510774	0.17675917442026	0.00277136644965812
ENSG00000118193	9928	KIF14	kinesin family member 14	964.017597936695	-0.294803582859811	0.00278165446116321
ENSG00000117650	4751	NEK2	NIMA related kinase 2	398.467188348489	-0.432556066418619	0.00290635866996872
ENSG00000142798	3339	HSPG2	heparan sulfate proteoglycan 2	3248.53006192247	0.44381992387733	0.0029674928396383
ENSG00000183963	6525	SMTN	smoothelin	1323.46939601249	0.316266665322199	0.00297329086302307
ENSG00000104731	54758	KLHDC4	kelch domain containing 4	220.321416587651	0.549701493240063	0.00301762023218121
ENSG00000147862	4781	NFIB	nuclear factor I B	831.939650598807	0.287745674114069	0.00301762023218121
ENSG00000071894	29894	CPSF1	cleavage and polyadenylation specific factor 1	737.52080935678	0.338679687223458	0.00303420368222268
ENSG00000152253	57405	SPC25	SPC25, NDC80 kinetochore complex component	373.799058072388	-0.406523531964172	0.00303420368222268
ENSG00000029363	9774	BCLAF1	BCL2 associated transcription factor 1	1077.71014558566	-0.251222570604893	0.0031354524600447
ENSG00000125868	11034	DSTN	destrin, actin depolymerizing factor	9065.15263575783	-0.212837607777297	0.00316503428939395
ENSG00000160957	9401	RECQL4	RecQ like helicase 4	687.445518256229	0.306399027258241	0.00316503428939395
ENSG00000197530	142678	MIB2	mindbomb E3 ubiquitin protein ligase 2	184.442407074108	0.550572834939957	0.00316503428939395
ENSG00000124181	5335	PLCG1	phospholipase C gamma 1	1502.00548950505	0.292114404990808	0.00317611777514608
ENSG00000104852	6625	SNRNP70	small nuclear ribonucleoprotein U1 subunit 70	1456.6595736178	0.320291233879251	0.00320778085257344
ENSG00000145555	4651	MYO10	myosin X	1435.30822907624	-0.222368734616845	0.00326169302220975
ENSG00000165959	79789	CLMN	calmin	538.898851998706	0.348292177362491	0.00326418570313221
ENSG00000136824	10592	SMC2	structural maintenance of chromosomes 2	1727.49250821142	-0.232893778020176	0.00329750406498166
ENSG00000114857	4820	NKTR	natural killer cell triggering receptor	584.791526055661	0.444391984056812	0.00341455948025985
ENSG00000090889	24137	KIF4A	kinesin family member 4A	847.080446979487	-0.26877760687231	0.00352503345855554
ENSG00000120437	39	ACAT2	acetyl-CoA acetyltransferase 2	373.372887573923	-0.402712578976693	0.00353187586214727
ENSG00000138160	3832	KIF11	kinesin family member 11	1382.33122174892	-0.254196614412008	0.00353940260395851
ENSG00000138182	9585	KIF20B	kinesin family member 20B	1070.55944614005	-0.276363382245852	0.00359533625199019
ENSG00000166347	1528	CYB5A	cytochrome b5 type A	232.832976188104	-0.509035824323419	0.00359533625199019
ENSG00000116489	829	CAPZA1	capping actin protein of muscle Z-line alpha subunit 1	2029.65768099062	-0.249915961896684	0.00373795974543884
ENSG00000106052	8887	TAX1BP1	Tax1 binding protein 1	2220.80076484418	-0.206130031614242	0.00374802881167231
ENSG00000110958	10728	PTGES3	prostaglandin E synthase 3	3196.58171089946	-0.256758336596358	0.00390302320335476
ENSG00000189403	3146	HMGB1	high mobility group box 1	2433.01238770938	-0.259000239577784	0.00390302320335476
ENSG00000124333	6845	VAMP7	vesicle associated membrane protein 7	586.452300244945	-0.330994669414226	0.0039150942673656
ENSG00000181523	6448	SGSH	N-sulfoglucosamine sulfohydrolase	415.310584541482	0.434440987613831	0.00400959132451899
ENSG00000104131	8669	EIF3J	eukaryotic translation initiation factor 3 subunit J	702.437567520385	-0.309852252677974	0.00401264018630546
ENSG00000125746	24139	EML2	echinoderm microtubule associated protein like 2	138.165319024251	0.633322808820098	0.00401943970685718
ENSG00000141756	60681	FKBP10	FK506 binding protein 10	1837.28401435302	0.218047159716552	0.00401943970685718
ENSG00000179862	163732	CITED4	Cbp/p300 interacting transactivator with Glu/Asp rich carboxy-terminal domain 4	426.673264179333	0.40606988881935	0.00422954562462554
ENSG00000105875	29062	WDR91	WD repeat domain 91	592.341803076465	0.363740599042019	0.00427933685385209
ENSG00000164346	10412	NSA2	NSA2, ribosome biogenesis homolog	534.691692892742	-0.398522062582413	0.00433281086330757
ENSG00000197461	5154	PDGFA	platelet derived growth factor subunit A	975.052625508305	0.266870365014748	0.00435792863550994
ENSG00000149499	256364	EML3	echinoderm microtubule associated protein like 3	497.855712811107	0.354955570161506	0.00439975865093717
ENSG00000057608	2665	GDI2	GDP dissociation inhibitor 2	1330.42839765751	-0.238599592079746	0.00448924623380383
ENSG00000279088	NA	NA	NA	41.69131459208	1.22742385885381	0.00449003963636615
ENSG00000128989	10776	ARPP19	cAMP regulated phosphoprotein 19	2037.77315205497	-0.231964013151687	0.0044991351292424
ENSG00000101199	55738	ARFGAP1	ADP ribosylation factor GTPase activating protein 1	851.103973779886	0.391860911167903	0.00453225741028637
ENSG00000131196	4772	NFATC1	nuclear factor of activated T-cells 1	198.634557028654	0.538811234453301	0.00453225741028637
ENSG00000167702	90990	KIFC2	kinesin family member C2	187.314049714242	0.596208895965929	0.00453225741028637
ENSG00000134910	3703	STT3A	STT3A, catalytic subunit of the oligosaccharyltransferase complex	1977.01801986228	-0.20281895201453	0.00456004788303832
ENSG00000179241	143458	LDLRAD3	low density lipoprotein receptor class A domain containing 3	175.095265217124	0.584556288941423	0.0045746994595074
ENSG00000269821	10984	KCNQ1OT1	KCNQ1 opposite strand/antisense transcript 1 (non-protein coding)	348.347751186376	0.526011548550173	0.0045746994595074
ENSG00000116667	81563	C1orf21	chromosome 1 open reading frame 21	881.609825974963	-0.272565441607992	0.00459667495110306
ENSG00000197912	6687	SPG7	SPG7, paraplegin matrix AAA peptidase subunit	527.767602805658	0.392772204851118	0.00459667495110306
ENSG00000131724	3597	IL13RA1	interleukin 13 receptor subunit alpha 1	564.66928735339	-0.31300720193001	0.00462710301857107
ENSG00000108953	7531	YWHAE	tyrosine 3-monooxygenase/tryptophan 5-monooxygenase activation protein epsilon	3245.51065356484	-0.222535345059136	0.00462859318372202
ENSG00000134986	9315	NREP	neuronal regeneration related protein	646.505152380926	-0.299118092459702	0.00472879264981827
ENSG00000128791	57045	TWSG1	twisted gastrulation BMP signaling modulator 1	695.075341760589	-0.334434051961195	0.00475304775132699
ENSG00000121621	81930	KIF18A	kinesin family member 18A	288.215834663121	-0.425855088983493	0.00482394983738764
ENSG00000169871	81844	TRIM56	tripartite motif containing 56	570.260989774317	0.347798867591106	0.00496639179362695
ENSG00000106537	27075	TSPAN13	tetraspanin 13	1998.78817330592	-0.201198980297163	0.00514049682560314
ENSG00000125740	2354	FOSB	FosB proto-oncogene, AP-1 transcription factor subunit	785.968272311731	1.41168883767534	0.00520398412062513
ENSG00000106333	5118	PCOLCE	procollagen C-endopeptidase enhancer	1051.4890134712	0.277881230336443	0.00524358825793513
ENSG00000169504	25932	CLIC4	chloride intracellular channel 4	3860.68910327843	-0.271698623565705	0.00526170056761217
ENSG00000242802	9907	AP5Z1	adaptor related protein complex 5 zeta 1 subunit	311.309477011891	0.421410350500166	0.00530854522602332
ENSG00000126777	3895	KTN1	kinectin 1	2020.01376175979	-0.199757134823881	0.00536012429268094
ENSG00000138180	55165	CEP55	centrosomal protein 55	848.440171695503	-0.279711164651581	0.00539368770379645
ENSG00000157193	7804	LRP8	LDL receptor related protein 8	1457.03856463461	0.221741517985765	0.00539368770379645
ENSG00000117519	1266	CNN3	calponin 3	1479.35295863418	-0.249877418689145	0.00540058527132334
ENSG00000143507	11221	DUSP10	dual specificity phosphatase 10	161.475726346536	-0.555297691718946	0.00548522677522295
ENSG00000168056	4054	LTBP3	latent transforming growth factor beta binding protein 3	1544.55801793307	0.301282114197735	0.00566061291860445
ENSG00000104368	5327	PLAT	plasminogen activator, tissue type	2551.47894538835	-0.199651872430212	0.00570940353300209
ENSG00000171246	4884	NPTX1	neuronal pentraxin 1	193.528458763465	0.540945995378324	0.00578538700616172
ENSG00000197355	91373	UAP1L1	UDP-N-acetylglucosamine pyrophosphorylase 1 like 1	603.191961131833	0.317496553206147	0.00590603038170464
ENSG00000077264	5063	PAK3	p21 (RAC1) activated kinase 3	104.478350107659	-0.677516816473746	0.00591593124580366
ENSG00000116459	515	ATP5F1	ATP synthase, H+ transporting, mitochondrial Fo complex subunit B1	1312.14478897774	-0.221528829984986	0.00607785603319633
ENSG00000155959	7411	VBP1	VHL binding protein 1	642.148096484861	-0.34254156114867	0.00607785603319633
ENSG00000081479	4036	LRP2	LDL receptor related protein 2	127.045313644827	0.674868650840988	0.00610545398450266
ENSG00000162104	115	ADCY9	adenylate cyclase 9	452.512501169967	0.376169478811181	0.00617129037683059
ENSG00000170500	164832	LONRF2	LON peptidase N-terminal domain and ring finger 2	719.068984776115	0.345842790341729	0.00625606191059376
ENSG00000184164	79174	CRELD2	cysteine rich with EGF like domains 2	894.571435010914	0.268598985974491	0.0062651276435817
ENSG00000229180	NA	NA	NA	96.7144509173148	0.727693760917122	0.0062651276435817
ENSG00000108797	8506	CNTNAP1	contactin associated protein 1	247.665311545398	0.464023430397001	0.00628781311660326
ENSG00000119048	7320	UBE2B	ubiquitin conjugating enzyme E2 B	452.754922376598	-0.362596877339036	0.00628781311660326
ENSG00000126705	27245	AHDC1	AT-hook DNA binding motif containing 1	222.676803643803	0.543191832529312	0.00628781311660326
ENSG00000164877	79778	MICALL2	MICAL like 2	458.955584910776	0.449922683236121	0.00628781311660326
ENSG00000143401	81611	ANP32E	acidic nuclear phosphoprotein 32 family member E	1707.33184398925	-0.263408270152927	0.00628877094840917
ENSG00000028528	6642	SNX1	sorting nexin 1	2209.40422613995	-0.232099430203346	0.00631411546323848
ENSG00000152256	5163	PDK1	pyruvate dehydrogenase kinase 1	270.35581900867	-0.457584939598828	0.00631411546323848
ENSG00000179222	9500	MAGED1	MAGE family member D1	1952.47923642195	0.211366150408076	0.00631411546323848
ENSG00000140465	1543	CYP1A1	cytochrome P450 family 1 subfamily A member 1	45.7987087294523	1.05217768405413	0.00634620753716674
ENSG00000241973	5297	PI4KA	phosphatidylinositol 4-kinase alpha	1140.29857429387	0.260871761711176	0.006526520134069
ENSG00000104960	53635	PTOV1	prostate tumor overexpressed 1	273.352537827383	0.463937415781354	0.00657392772587474
ENSG00000109572	1182	CLCN3	chloride voltage-gated channel 3	1229.89468872767	-0.241310678698028	0.00657392772587474
ENSG00000170759	3799	KIF5B	kinesin family member 5B	2939.45890290482	-0.189254647778388	0.00657392772587474
ENSG00000174938	26470	SEZ6L2	seizure related 6 homolog like 2	387.39326673232	0.388156395415598	0.00657392772587474
ENSG00000102901	80152	CENPT	centromere protein T	193.054755574745	0.53165080426902	0.0066415509659114
ENSG00000136999	4856	NOV	nephroblastoma overexpressed	86.1680644373613	0.748506619861334	0.00671887996279111
ENSG00000044524	2042	EPHA3	EPH receptor A3	923.281862148557	-0.257668281219848	0.00678486915074721
ENSG00000133318	10313	RTN3	reticulon 3	1564.06855997451	-0.212329585128993	0.00678486915074721
ENSG00000151914	667	DST	dystonin	2256.11874386371	0.238912483335636	0.00678486915074721
ENSG00000156642	27020	NPTN	neuroplastin	1139.63660477566	-0.23379603323706	0.00678486915074721
ENSG00000154265	23461	ABCA5	ATP binding cassette subfamily A member 5	268.218726284395	0.451185944963351	0.00683639391590499
ENSG00000170312	983	CDK1	cyclin dependent kinase 1	1413.09403790486	-0.267662134266583	0.00683639391590499
ENSG00000100300	706	TSPO	translocator protein	671.926207110478	0.301089822611168	0.00705814304092826
ENSG00000108091	8030	CCDC6	coiled-coil domain containing 6	465.250641837711	-0.338061275563627	0.00705814304092826
ENSG00000205903	100131017	ZNF316	zinc finger protein 316	461.556930162526	0.364348687530477	0.00705814304092826
ENSG00000127586	63922	CHTF18	chromosome transmission fidelity factor 18	471.005536666822	0.464431220468923	0.00727423568397463
ENSG00000167513	81620	CDT1	chromatin licensing and DNA replication factor 1	526.17802915546	0.320546727720571	0.00727423568397463
ENSG00000163808	56992	KIF15	kinesin family member 15	795.195829383102	-0.26990843455532	0.00738109210585923
ENSG00000164904	501	ALDH7A1	aldehyde dehydrogenase 7 family member A1	1240.90422486445	-0.216778153038116	0.00738353865462718
ENSG00000183098	10082	GPC6	glypican 6	647.818774505833	-0.294955914944716	0.00740182492668917
ENSG00000142676	6135	RPL11	ribosomal protein L11	3686.74509992418	-0.196370153848156	0.00741155222086747
ENSG00000038002	175	AGA	aspartylglucosaminidase	522.552850587821	-0.321648803564902	0.00750631773979316
ENSG00000143228	83540	NUF2	NUF2, NDC80 kinetochore complex component	637.166207828687	-0.350254256356657	0.00780185131138207
ENSG00000198625	4194	MDM4	MDM4, p53 regulator	426.478420765241	0.407017914456026	0.00780261980390238
ENSG00000255717	23642	SNHG1	small nucleolar RNA host gene 1	391.175262406617	0.443405534827921	0.00789400811002982
ENSG00000132510	23135	KDM6B	lysine demethylase 6B	113.222531821892	0.647183751533439	0.00791122288785803
ENSG00000170345	2353	FOS	Fos proto-oncogene, AP-1 transcription factor subunit	2625.98693576105	0.621417312308409	0.00791122288785803
ENSG00000067225	5315	PKM	pyruvate kinase, muscle	27837.1892832453	-0.144429293484707	0.00818766532248115
ENSG00000114923	6508	SLC4A3	solute carrier family 4 member 3	266.836893916343	0.482800035417384	0.00863395742911811
ENSG00000124207	1434	CSE1L	chromosome segregation 1 like	3049.69149151152	-0.194515936339746	0.00867949362458737
ENSG00000164176	10085	EDIL3	EGF like repeats and discoidin domains 3	1581.30325890587	-0.250279010148986	0.00871259826462652
ENSG00000197136	399909	PCNX3	pecanex homolog 3 (Drosophila)	1030.2800485202	0.267742653058533	0.00871259826462652
ENSG00000123989	79586	CHPF	chondroitin polymerizing factor	1791.9137497224	0.201335938868596	0.00874195833801655
ENSG00000140400	4123	MAN2C1	mannosidase alpha class 2C member 1	290.815432782986	0.570174624025266	0.00884642584625638
ENSG00000149196	51501	HIKESHI	Hikeshi, heat shock protein nuclear import factor	99.7295083480063	-0.668064968966831	0.00890915685818488
ENSG00000092841	4637	MYL6	myosin light chain 6	2954.02504019342	-0.198855278439135	0.00893475354423279
ENSG00000110841	8496	PPFIBP1	PPFIA binding protein 1	926.196059189911	-0.250388069962516	0.00893475354423279
ENSG00000131067	2686	GGT7	gamma-glutamyltransferase 7	514.854999926023	0.369255483979939	0.00893475354423279
ENSG00000164932	115908	CTHRC1	collagen triple helix repeat containing 1	674.726019919525	-0.316990276927659	0.00893475354423279
ENSG00000167291	125058	TBC1D16	TBC1 domain family member 16	1801.40888692077	0.20414220639779	0.00893475354423279
ENSG00000188549	388115	C15orf52	chromosome 15 open reading frame 52	463.593834876633	0.443346693992495	0.00893475354423279
ENSG00000198837	9909	DENND4B	DENN domain containing 4B	553.023946202511	0.341515880488986	0.00893475354423279
ENSG00000137710	5962	RDX	radixin	757.41059299392	-0.28828143820984	0.00893905934030397
ENSG00000212907	4539	ND4L	NADH dehydrogenase, subunit 4L (complex I)	3237.21573601283	0.261522792032067	0.00902469924586553
ENSG00000065613	9748	SLK	STE20 like kinase	873.266343844032	-0.257886059039609	0.00905600274935686
ENSG00000189067	9516	LITAF	lipopolysaccharide induced TNF factor	988.748763036198	-0.24424747450444	0.00907953544051227
ENSG00000132475	3021	H3F3B	H3 histone family member 3B	9266.69235969352	-0.141518933442057	0.00928509810169098
ENSG00000198898	830	CAPZA2	capping actin protein of muscle Z-line alpha subunit 2	1093.22748879003	-0.291272190176103	0.00928509810169098
ENSG00000165458	3636	INPPL1	inositol polyphosphate phosphatase like 1	1489.12671752982	0.225381197779036	0.00938271140434586
ENSG00000108784	4669	NAGLU	N-acetyl-alpha-glucosaminidase	396.823800635318	0.363216178289295	0.00943755210366949
ENSG00000114346	1894	ECT2	epithelial cell transforming 2	942.852143893597	-0.237019643989137	0.00943755210366949
ENSG00000165417	2957	GTF2A1	general transcription factor IIA subunit 1	527.787174484463	-0.348805198143204	0.00943755210366949
ENSG00000092964	1808	DPYSL2	dihydropyrimidinase like 2	828.862638252225	-0.280690228859741	0.00980884324553688
ENSG00000160072	83858	ATAD3B	ATPase family, AAA domain containing 3B	226.863745420326	0.48050594019453	0.00981651320435539
ENSG00000063438	57491	AHRR	aryl-hydrocarbon receptor repressor	620.652385845982	0.297036998043083	0.00989690019737655
ENSG00000167470	90007	MIDN	midnolin	647.87614863191	0.305606694138456	0.00989690019737655
ENSG00000213585	7416	VDAC1	voltage dependent anion channel 1	2677.96087957511	-0.181090887360176	0.00989690019737655
ENSG00000198420	9747	TCAF1	TRPM8 channel associated factor 1	521.515625098313	-0.318935187118037	0.00993697495286979
ENSG00000065978	4904	YBX1	Y-box binding protein 1	5421.83448055476	-0.170116091117535	0.0101313711845969
ENSG00000122042	5412	UBL3	ubiquitin like 3	510.403766835737	-0.318891870928916	0.0102584271611027
ENSG00000160949	4796	TONSL	tonsoku like, DNA repair protein	406.506027063805	0.39301077845296	0.0102584271611027
ENSG00000179532	144132	DNHD1	dynein heavy chain domain 1	82.5183802822539	0.845947925816732	0.0102730777435969
ENSG00000134186	55119	PRPF38B	pre-mRNA processing factor 38B	424.92758049246	0.362479743505457	0.0106719661016526
ENSG00000163945	57654	UVSSA	UV stimulated scaffold protein A	248.773333470768	0.522208432615778	0.0106719661016526
ENSG00000076928	9138	ARHGEF1	Rho guanine nucleotide exchange factor 1	897.328879858042	0.258996946352012	0.0107512461217107
ENSG00000104936	1760	DMPK	dystrophia myotonica protein kinase	172.89419323811	0.638572038059153	0.0108289901841837
ENSG00000122952	11130	ZWINT	ZW10 interacting kinetochore protein	1270.34330922206	-0.217516509794524	0.0108289901841837
ENSG00000113621	79770	TXNDC15	thioredoxin domain containing 15	758.772185738712	-0.316373341173029	0.0108943477539389
ENSG00000167792	4723	NDUFV1	NADH:ubiquinone oxidoreductase core subunit V1	1204.0562550172	0.23164856311086	0.0108943477539389
ENSG00000115159	2820	GPD2	glycerol-3-phosphate dehydrogenase 2	1782.24471865352	-0.213597148089202	0.01094386109999
ENSG00000117143	6675	UAP1	UDP-N-acetylglucosamine pyrophosphorylase 1	858.211530838303	-0.256374173231535	0.0110594183977046
ENSG00000074800	2023	ENO1	enolase 1	12668.8910691761	-0.147787377246795	0.0112495166520917
ENSG00000167378	126298	IRGQ	immunity related GTPase Q	226.601387870261	0.510171446272138	0.0112599985762465
ENSG00000102038	6594	SMARCA1	SWI/SNF related, matrix associated, actin dependent regulator of chromatin, subfamily a, member 1	1132.83912561057	-0.233364817501951	0.0115322499169979
ENSG00000156970	701	BUB1B	BUB1 mitotic checkpoint serine/threonine kinase B	814.585354058114	-0.247579937733253	0.0115644523520769
ENSG00000091986	151887	CCDC80	coiled-coil domain containing 80	340.998796582157	-0.406298223324299	0.011613575208029
ENSG00000152952	5352	PLOD2	procollagen-lysine,2-oxoglutarate 5-dioxygenase 2	1606.5002367997	-0.246784931987677	0.011613575208029
ENSG00000101361	10528	NOP56	NOP56 ribonucleoprotein	1784.54999894342	0.20189762604364	0.0117427600493351
ENSG00000084774	790	CAD	carbamoyl-phosphate synthetase 2, aspartate transcarbamylase, and dihydroorotase	1009.11782941032	0.295532447102157	0.0118032207331452
ENSG00000130304	376497	SLC27A1	solute carrier family 27 member 1	135.77303402963	0.564414358752808	0.0118340479481973
ENSG00000138071	10097	ACTR2	ARP2 actin related protein 2 homolog	3640.59167218903	-0.198319562009096	0.0118340479481973
ENSG00000166913	7529	YWHAB	tyrosine 3-monooxygenase/tryptophan 5-monooxygenase activation protein beta	4495.45442677789	-0.171358944975807	0.0118340479481973
ENSG00000182087	91304	TMEM259	transmembrane protein 259	559.154843902944	0.325685241111894	0.0118340479481973
ENSG00000107984	22943	DKK1	dickkopf WNT signaling pathway inhibitor 1	99.071063203275	-0.743683090148517	0.0123416722648481
ENSG00000099899	27037	TRMT2A	tRNA methyltransferase 2 homolog A	369.389649819043	0.360742328335714	0.0124548715788205
ENSG00000087074	23645	PPP1R15A	protein phosphatase 1 regulatory subunit 15A	822.125945606423	0.266554114276502	0.0124646969561896
ENSG00000196547	4122	MAN2A2	mannosidase alpha class 2A member 2	676.253788899066	0.290147089747658	0.0125069834962692
ENSG00000137563	8836	GGH	gamma-glutamyl hydrolase	1134.47189331951	-0.243378898587358	0.0126007119083323
ENSG00000082898	7514	XPO1	exportin 1	2928.73898725472	-0.161751962698348	0.012711341012166
ENSG00000118276	9331	B4GALT6	beta-1,4-galactosyltransferase 6	689.042104404463	-0.276267888150153	0.012711341012166
ENSG00000075568	23505	TMEM131	transmembrane protein 131	1033.04917798366	0.223365639316462	0.013079404406726
ENSG00000109805	64151	NCAPG	non-SMC condensin I complex subunit G	968.273050131236	-0.233309517901944	0.013079404406726
ENSG00000049860	3074	HEXB	hexosaminidase subunit beta	3509.8731498839	-0.168861935508927	0.0130922577184703
ENSG00000138760	950	SCARB2	scavenger receptor class B member 2	3069.4914161753	-0.170404917661985	0.0130922577184703
ENSG00000173638	6573	SLC19A1	solute carrier family 19 member 1	236.809628474057	0.432582138324635	0.0131344967461005
ENSG00000151725	79682	CENPU	centromere protein U	834.845788478335	-0.264009800125848	0.0132429957854216
ENSG00000147010	30011	SH3KBP1	SH3 domain containing kinase binding protein 1	1292.1939909912	-0.204541160442503	0.013377415871095
ENSG00000164611	9232	PTTG1	pituitary tumor-transforming 1	805.55893072431	-0.246580578154832	0.0134412248746075
ENSG00000115318	84695	LOXL3	lysyl oxidase like 3	2756.19464274406	0.165940487444683	0.0135764272099847
ENSG00000064932	22904	SBNO2	strawberry notch homolog 2	532.590941751022	0.301345259816941	0.0136901257365616
ENSG00000267680	7767	ZNF224	zinc finger protein 224	43.0157171454521	1.11517608377389	0.0136901257365616
ENSG00000203705	128387	TATDN3	TatD DNase domain containing 3	125.532306930143	-0.57299741291095	0.0137103701656949
ENSG00000154803	201163	FLCN	folliculin	178.384299848604	0.525281852348525	0.0144368325927634
ENSG00000143621	3608	ILF2	interleukin enhancer binding factor 2	1895.10875386104	-0.188387303852416	0.0144615116123303
ENSG00000147274	27316	RBMX	RNA binding motif protein, X-linked	1884.1120968654	-0.185658569908685	0.0145983455374399
ENSG00000149177	5795	PTPRJ	protein tyrosine phosphatase, receptor type J	889.861531276961	-0.250979992392565	0.0148415710291385
ENSG00000167280	64772	ENGASE	endo-beta-N-acetylglucosaminidase	392.422386304048	0.454298593974694	0.0148415710291385
ENSG00000169062	65110	UPF3A	UPF3 regulator of nonsense transcripts homolog A (yeast)	133.455637568563	0.578938201490834	0.0148415710291385
ENSG00000064961	10362	HMG20B	high mobility group 20B	2780.20712213829	0.173170775125171	0.0149565479464882
ENSG00000106780	1955	MEGF9	multiple EGF like domains 9	608.857482861136	-0.293011400162016	0.0149565479464882
ENSG00000134291	79022	TMEM106C	transmembrane protein 106C	1844.79707434488	-0.199819439537832	0.0149565479464882
ENSG00000134308	10971	YWHAQ	tyrosine 3-monooxygenase/tryptophan 5-monooxygenase activation protein theta	4509.78996339177	-0.203188911011328	0.0149565479464882
ENSG00000165304	9833	MELK	maternal embryonic leucine zipper kinase	961.501328158189	-0.256363050382785	0.0149565479464882
ENSG00000111206	2305	FOXM1	forkhead box M1	1570.13400165111	-0.209664635864172	0.0149743970169401
ENSG00000173692	5707	PSMD1	proteasome 26S subunit, non-ATPase 1	2243.42146428768	-0.195347021034341	0.0150746126330996
ENSG00000215908	NA	NA	NA	132.283793222292	0.573694074564064	0.0150746126330996
ENSG00000138448	3685	ITGAV	integrin subunit alpha V	2661.97045301286	-0.183927354509635	0.0151932454567982
ENSG00000169607	150468	CKAP2L	cytoskeleton associated protein 2 like	874.735770364504	-0.232262043816539	0.0151932454567982
ENSG00000111859	4739	NEDD9	neural precursor cell expressed, developmentally down-regulated 9	329.478372370387	-0.3760898700826	0.0153333608026837
ENSG00000130522	3727	JUND	JunD proto-oncogene, AP-1 transcription factor subunit	471.56261555853	0.314113651447174	0.0157377701948298
ENSG00000184661	157313	CDCA2	cell division cycle associated 2	510.078508818086	-0.299595262590179	0.0157377701948298
ENSG00000139718	23067	SETD1B	SET domain containing 1B	186.55095251861	0.475945540638328	0.0157581216093529
ENSG00000102189	8411	EEA1	early endosome antigen 1	517.388144338696	-0.297631630144183	0.0158323193720174
ENSG00000162704	10092	ARPC5	actin related protein 2/3 complex subunit 5	2078.20046650716	-0.207357155548337	0.0158645044508777
ENSG00000125089	54436	SH3TC1	SH3 domain and tetratricopeptide repeats 1	42.70339602358	1.05339245131885	0.0158795587005268
ENSG00000069275	64710	NUCKS1	nuclear casein kinase and cyclin dependent kinase substrate 1	6486.36047607268	-0.176583505423906	0.0160172366817505
ENSG00000123243	80760	ITIH5	inter-alpha-trypsin inhibitor heavy chain family member 5	748.644273282382	0.268233305645776	0.0160172366817505
ENSG00000139631	51380	CSAD	cysteine sulfinic acid decarboxylase	108.57756442247	0.748847413296466	0.0160457395315784
ENSG00000143061	3321	IGSF3	immunoglobulin superfamily member 3	1453.41451934146	-0.192107118549747	0.0160611194343057
ENSG00000126261	10054	UBA2	ubiquitin like modifier activating enzyme 2	1133.06593946334	-0.240823622192344	0.0162195431154535
ENSG00000213846	NA	NA	NA	77.6612306914974	-0.754983644243012	0.0163421303137883
ENSG00000116285	54206	ERRFI1	ERBB receptor feedback inhibitor 1	343.075983516695	-0.358218398247788	0.0163485166006208
ENSG00000118515	6446	SGK1	serum/glucocorticoid regulated kinase 1	532.147317460262	0.349811175067438	0.0166091760268027
ENSG00000132199	55556	ENOSF1	enolase superfamily member 1	168.405571786711	0.612516723236238	0.0166091760268027
ENSG00000167881	6730	SRP68	signal recognition particle 68	1715.93782142301	-0.189103059115164	0.0167152937163847
ENSG00000103018	80777	CYB5B	cytochrome b5 type B	1396.89146935546	-0.209325257432828	0.0167526761360868
ENSG00000155366	389	RHOC	ras homolog family member C	1455.26562286195	-0.214898771067415	0.0169247343184106
ENSG00000187961	339451	KLHL17	kelch like family member 17	99.7982523615338	0.701032773709292	0.0169247343184106
ENSG00000103249	1186	CLCN7	chloride voltage-gated channel 7	444.435986756683	0.331782598011714	0.0169636353941306
ENSG00000185359	9146	HGS	hepatocyte growth factor-regulated tyrosine kinase substrate	1124.12908735305	0.222179881695848	0.0169636353941306
ENSG00000135740	6553	SLC9A5	solute carrier family 9 member A5	98.4026636866727	0.706429968175232	0.0169700847735022
ENSG00000177706	56975	FAM20C	FAM20C, golgi associated secretory pathway kinase	6077.77878904652	0.136805742205811	0.0170214077519609
ENSG00000084112	54434	SSH1	slingshot protein phosphatase 1	1833.17150547341	0.220862741988366	0.0174576211450486
ENSG00000113810	10051	SMC4	structural maintenance of chromosomes 4	2057.0768462277	-0.209758385742471	0.0174576211450486
ENSG00000081154	57092	PCNP	PEST proteolytic signal containing nuclear protein	1090.57204987016	-0.231936872997915	0.0174676820976449
ENSG00000124795	7913	DEK	DEK proto-oncogene	2285.40097402029	-0.243153088718361	0.0174777031694756
ENSG00000067191	782	CACNB1	calcium voltage-gated channel auxiliary subunit beta 1	46.8632776344042	0.944568828195918	0.0175094078644567
ENSG00000159840	7791	ZYX	zyxin	1973.0959801286	-0.184170343201415	0.0175094078644567
ENSG00000167110	2801	GOLGA2	golgin A2	689.147894896817	0.249056299285431	0.0179826374144869
ENSG00000167393	28227	PPP2R3B	protein phosphatase 2 regulatory subunit B''beta	319.462963356344	0.38857100891081	0.0179826374144869
ENSG00000090975	57605	PITPNM2	phosphatidylinositol transfer protein membrane associated 2	469.023429863344	0.39584905414434	0.0180629396894503
ENSG00000198026	63925	ZNF335	zinc finger protein 335	371.647018469726	0.386085664685053	0.0182447505409906
ENSG00000109705	579	NKX3-2	NK3 homeobox 2	102.009325592678	0.617965405971882	0.0182661638900608
ENSG00000205356	25851	TECPR1	tectonin beta-propeller repeat containing 1	350.243098073132	0.350443703156043	0.0184780858167164
ENSG00000142892	10026	PIGK	phosphatidylinositol glycan anchor biosynthesis class K	846.615730784225	-0.266179931857567	0.0185273150526332
ENSG00000165323	120114	FAT3	FAT atypical cadherin 3	61.1312093603876	0.813832344833388	0.0188430862506481
ENSG00000131389	6533	SLC6A6	solute carrier family 6 member 6	1427.88047327951	0.197165745755059	0.0189012170051421
ENSG00000148341	56904	SH3GLB2	SH3 domain containing GRB2 like, endophilin B2	230.482094256805	0.408343003981944	0.01911195097424
ENSG00000197989	85028	SNHG12	small nucleolar RNA host gene 12	54.3765805926513	0.882764253245998	0.0191148605826001
ENSG00000198768	164284	APCDD1L	APC down-regulated 1 like	1726.05355725827	-0.199238830837304	0.0191455865387531
ENSG00000114554	5361	PLXNA1	plexin A1	432.741255227271	0.303246203504075	0.0196250686043327
ENSG00000065243	5586	PKN2	protein kinase N2	688.225938899479	-0.299717728932253	0.019911674549753
ENSG00000143742	6726	SRP9	signal recognition particle 9	1420.37751178184	-0.286465621184827	0.019911674549753
ENSG00000117450	5052	PRDX1	peroxiredoxin 1	1468.49535008813	-0.211266180519309	0.019969801291705
ENSG00000171867	5621	PRNP	prion protein	6717.2992250642	-0.153164200863508	0.019969801291705
ENSG00000185585	169611	OLFML2A	olfactomedin like 2A	124.654097240557	0.560624292820869	0.019969801291705
ENSG00000135272	29969	MDFIC	MyoD family inhibitor domain containing	577.023360699427	-0.299692203701272	0.0200592646893659
ENSG00000067704	55699	IARS2	isoleucyl-tRNA synthetase 2, mitochondrial	1803.06781420946	-0.188608414859455	0.0201657466939167
ENSG00000106100	10392	NOD1	nucleotide binding oligomerization domain containing 1	97.3327292466653	0.637617316559297	0.020235427454311
ENSG00000119326	8727	CTNNAL1	catenin alpha like 1	763.435440047553	-0.24851052570729	0.0203668488917006
ENSG00000066279	259266	ASPM	abnormal spindle microtubule assembly	1700.72516911403	-0.206689399091246	0.0204237665055077
ENSG00000104765	665	BNIP3L	BCL2 interacting protein 3 like	409.391550233817	-0.351307602860618	0.0204237665055077
ENSG00000115687	23178	PASK	PAS domain containing serine/threonine kinase	280.550666480289	0.513085869965839	0.0204237665055077
ENSG00000116754	9295	SRSF11	serine and arginine rich splicing factor 11	1334.06384937656	0.264335446051671	0.0204237665055077
ENSG00000128944	90417	KNSTRN	kinetochore localized astrin/SPAG5 binding protein	437.153724217383	-0.309617702317299	0.0204237665055077
ENSG00000105281	6510	SLC1A5	solute carrier family 1 member 5	985.977481306225	0.232461556844496	0.0205966743454944
ENSG00000080824	3320	HSP90AA1	heat shock protein 90 alpha family class A member 1	11131.2227506694	-0.165616465013713	0.0206973780944506
ENSG00000103254	65990	FAM173A	family with sequence similarity 173 member A	180.359323976499	0.476670032913537	0.0206973780944506
ENSG00000112473	7922	SLC39A7	solute carrier family 39 member 7	1235.23481533712	0.20074145032841	0.0206973780944506
ENSG00000116337	271	AMPD2	adenosine monophosphate deaminase 2	432.647742902227	0.32697350552778	0.0206973780944506
ENSG00000136295	80727	TTYH3	tweety family member 3	2239.49322744328	0.167808102700473	0.0206973780944506
ENSG00000140682	7041	TGFB1I1	transforming growth factor beta 1 induced transcript 1	333.244241446244	0.342851129699413	0.0206973780944506
ENSG00000147894	203228	C9orf72	chromosome 9 open reading frame 72	108.615824869975	0.63151705053919	0.0206973780944506
ENSG00000171223	3726	JUNB	JunB proto-oncogene, AP-1 transcription factor subunit	564.242262028194	0.343720666934542	0.0206973780944506
ENSG00000175224	9776	ATG13	autophagy related 13	468.939454206402	-0.303729781850627	0.0206973780944506
ENSG00000180530	8204	NRIP1	nuclear receptor interacting protein 1	338.49277795473	-0.335264815144364	0.0206973780944506
ENSG00000064607	10147	SUGP2	SURP and G-patch domain containing 2	716.276110978377	0.345962447567069	0.0208006942701342
ENSG00000122966	11113	CIT	citron rho-interacting serine/threonine kinase	1303.6342188255	0.223748891916025	0.0208777410161644
ENSG00000187079	7003	TEAD1	TEA domain transcription factor 1	1966.51444723133	-0.175856142188239	0.0208941803102124
ENSG00000100219	7494	XBP1	X-box binding protein 1	637.855151960259	0.257280219474494	0.0211542582571172
ENSG00000134690	55143	CDCA8	cell division cycle associated 8	609.941028134523	-0.267655684251103	0.0211542582571172
ENSG00000211459	4549	RNR1	s-rRNA	1383.19902531249	0.240982079859185	0.0211542582571172
ENSG00000170485	4862	NPAS2	neuronal PAS domain protein 2	449.679733730305	0.318702600973344	0.0211647259873975
ENSG00000198961	9867	PJA2	praja ring finger ubiquitin ligase 2	1535.15005745538	-0.196988445818855	0.0212098522650712
ENSG00000077782	2260	FGFR1	fibroblast growth factor receptor 1	449.332227723053	0.301746398010468	0.0212159024774808
ENSG00000125944	10236	HNRNPR	heterogeneous nuclear ribonucleoprotein R	2498.44348527421	-0.176769927932762	0.0213789554090589
ENSG00000138074	8884	SLC5A6	solute carrier family 5 member 6	423.201091935041	0.316270300222707	0.0214719331265135
ENSG00000158805	92822	ZNF276	zinc finger protein 276	85.3322737469662	0.775067303417768	0.0214719331265135
ENSG00000185650	677	ZFP36L1	ZFP36 ring finger protein like 1	1194.41479038987	0.252123886525764	0.0214719331265135
ENSG00000156103	4325	MMP16	matrix metallopeptidase 16	3128.72164014052	-0.155369834330435	0.0216480485616959
ENSG00000132361	23277	CLUH	clustered mitochondria homolog	449.021232924399	0.306625841494984	0.0218187281581999
ENSG00000204619	6992	PPP1R11	protein phosphatase 1 regulatory inhibitor subunit 11	280.785787989414	-0.369979485744861	0.0218187281581999
ENSG00000176444	1196	CLK2	CDC like kinase 2	375.918019677788	0.363063653508318	0.0219183317466329
ENSG00000128731	8924	HERC2	HECT and RLD domain containing E3 ubiquitin protein ligase 2	789.938226560943	0.265355078259643	0.02192379157633
ENSG00000176978	29952	DPP7	dipeptidyl peptidase 7	676.062949130449	0.276268192192538	0.02192379157633
ENSG00000197622	56882	CDC42SE1	CDC42 small effector 1	1666.40457759291	-0.193198218914678	0.0220576573415317
ENSG00000168078	55872	PBK	PDZ binding kinase	1174.5265937841	-0.250400991460005	0.022266614829398
ENSG00000112902	9037	SEMA5A	semaphorin 5A	297.667728099224	0.425807880841875	0.0227688658327527
ENSG00000101638	29906	ST8SIA5	ST8 alpha-N-acetyl-neuraminide alpha-2,8-sialyltransferase 5	2730.17859036973	0.236781481898325	0.0230052383631515
ENSG00000233016	84973	SNHG7	small nucleolar RNA host gene 7	134.3146155516	0.519350661637768	0.0230052383631515
ENSG00000032444	10908	PNPLA6	patatin like phospholipase domain containing 6	575.192726950277	0.278007735673363	0.0230478297230419
ENSG00000154175	25890	ABI3BP	ABI family member 3 binding protein	470.957943603887	-0.291688799190773	0.0230478297230419
ENSG00000171848	6241	RRM2	ribonucleotide reductase regulatory subunit M2	3398.07196295419	-0.212958247684808	0.0230478297230419
ENSG00000122884	5033	P4HA1	prolyl 4-hydroxylase subunit alpha 1	753.295533402705	-0.274659232388697	0.023113923984936
ENSG00000160285	4047	LSS	lanosterol synthase	768.849501424705	0.320785976044247	0.023113923984936
ENSG00000004777	115703	ARHGAP33	Rho GTPase activating protein 33	128.958790551139	0.670734278521137	0.0231523758669651
ENSG00000196230	203068	TUBB	tubulin beta class I	10869.5598362802	-0.128009961732622	0.0233269678571018
ENSG00000078304	5527	PPP2R5C	protein phosphatase 2 regulatory subunit B'gamma	616.079988634128	-0.260044783934266	0.0233503462167168
ENSG00000149930	9344	TAOK2	TAO kinase 2	778.461220030377	0.238146635192426	0.0235050775656718
ENSG00000007174	1770	DNAH9	dynein axonemal heavy chain 9	87.1164012561254	-0.639988661501405	0.0241915755699094
ENSG00000148840	23082	PPRC1	peroxisome proliferator-activated receptor gamma, coactivator-related 1	334.715774430315	0.341305017063516	0.0243752676452829
ENSG00000204394	7407	VARS	valyl-tRNA synthetase	1232.16294264938	0.198805475778833	0.0243752676452829
ENSG00000065809	83641	FAM107B	family with sequence similarity 107 member B	181.650233418106	-0.445042030292055	0.0245513923132936
ENSG00000148399	92715	DPH7	diphthamide biosynthesis 7	113.604336779235	0.606737775853821	0.0245513923132936
ENSG00000175066	256356	GK5	glycerol kinase 5 (putative)	147.249732748022	0.517550093999412	0.0245513923132936
ENSG00000182871	80781	COL18A1	collagen type XVIII alpha 1 chain	1626.89221216652	0.183735438080673	0.0245513923132936
ENSG00000231290	149773	APCDD1L-AS1	APCDD1L antisense RNA 1 (head to head)	321.898356917168	-0.344875605405868	0.0245513923132936
ENSG00000135250	6733	SRPK2	SRSF protein kinase 2	814.135657910189	-0.225488447954167	0.0247125751385536
ENSG00000198753	5365	PLXNB3	plexin B3	1878.08467807484	0.595307513218097	0.0247125751385536
ENSG00000213983	8906	AP1G2	adaptor related protein complex 1 gamma 2 subunit	46.4218652976463	0.938997664697466	0.0247125751385536
ENSG00000018408	25937	WWTR1	WW domain containing transcription regulator 1	3010.26970291288	-0.165261554424353	0.0249011642033417
ENSG00000123983	2181	ACSL3	acyl-CoA synthetase long-chain family member 3	4580.0667860975	-0.13757012801557	0.0249011642033417
ENSG00000168079	286133	SCARA5	scavenger receptor class A member 5	130.144299558321	0.528391769442361	0.0249121646137874
ENSG00000112159	23195	MDN1	midasin AAA ATPase 1	636.834357440174	0.277814975984636	0.0250793918917156
ENSG00000178498	196403	DTX3	deltex E3 ubiquitin ligase 3	181.026282791993	0.490759487689928	0.0250793918917156
ENSG00000227671	NA	NA	NA	178.292399396746	0.548771360442365	0.0250793918917156
ENSG00000158106	114822	RHPN1	rhophilin Rho GTPase binding protein 1	83.2919450277082	0.774704432733516	0.025198517985313
ENSG00000055609	58508	KMT2C	lysine methyltransferase 2C	734.660808280498	0.283131016389618	0.0252868567518254
ENSG00000103199	26048	ZNF500	zinc finger protein 500	96.9492835330251	0.619361750892001	0.0252868567518254
ENSG00000104859	11129	CLASRP	CLK4 associating serine/arginine rich protein	225.2052621862	0.483706302142742	0.0252868567518254
ENSG00000105656	8178	ELL	elongation factor for RNA polymerase II	86.5497626446917	0.66000179167039	0.0252868567518254
ENSG00000120860	51019	WASHC3	WASH complex subunit 3	137.872632428467	0.574615342711059	0.0252868567518254
ENSG00000090615	2802	GOLGA3	golgin A3	594.294150808265	0.27832506818306	0.0255050228286477
ENSG00000095951	3096	HIVEP1	human immunodeficiency virus type I enhancer binding protein 1	125.480044174974	0.533658817226922	0.0255050228286477
ENSG00000155850	1836	SLC26A2	solute carrier family 26 member 2	4823.88417430764	-0.150701851752786	0.0255050228286477
ENSG00000109654	23321	TRIM2	tripartite motif containing 2	3102.26595890632	-0.162665542485219	0.0255980560874702
ENSG00000073756	5743	PTGS2	prostaglandin-endoperoxide synthase 2	276.115179476134	0.403810276012943	0.0257381794444143
ENSG00000095002	4436	MSH2	mutS homolog 2	751.644453026877	-0.240297364266635	0.0257914022573052
ENSG00000115875	6432	SRSF7	serine and arginine rich splicing factor 7	1459.28765931278	0.186590920766471	0.0257914022573052
ENSG00000136379	58489	ABHD17C	abhydrolase domain containing 17C	535.829219724887	-0.279024092648222	0.0257914022573052
ENSG00000152377	6695	SPOCK1	SPARC/osteonectin, cwcv and kazal like domains proteoglycan 1	1792.85142313982	-0.169020458706659	0.0257914022573052
ENSG00000055732	55283	MCOLN3	mucolipin 3	61.3786734787084	0.787659037133805	0.0261893951258165
ENSG00000146674	3486	IGFBP3	insulin like growth factor binding protein 3	303.754151502777	0.346319555121448	0.0261893951258165
ENSG00000166200	9318	COPS2	COP9 signalosome subunit 2	1090.95333209924	-0.224625620127428	0.0261893951258165
ENSG00000104419	10397	NDRG1	N-myc downstream regulated 1	781.87304964154	0.266027713297315	0.0262893346773129
ENSG00000138134	57559	STAMBPL1	STAM binding protein like 1	113.652664280721	0.597591360106178	0.0262893346773129
ENSG00000135862	3915	LAMC1	laminin subunit gamma 1	7826.12010197398	0.162889528787577	0.0263393864305202
ENSG00000101940	64743	WDR13	WD repeat domain 13	352.596660030834	0.373788630830828	0.0263542653787776
ENSG00000111231	51184	GPN3	GPN-loop GTPase 3	222.492746016168	-0.422028604099509	0.0263542653787776
ENSG00000187531	51547	SIRT7	sirtuin 7	261.033426012333	0.438438447531646	0.0263873609130684
ENSG00000092140	55632	G2E3	G2/M-phase specific E3 ubiquitin protein ligase	280.71968478515	-0.364135477654128	0.02639462870787
ENSG00000101972	10735	STAG2	stromal antigen 2	1098.94973504	-0.210897601670365	0.026442255312466
ENSG00000161204	55324	ABCF3	ATP binding cassette subfamily F member 3	315.287702812978	0.344962639006901	0.0265440422659499
ENSG00000178761	57184	FAM219B	family with sequence similarity 219 member B	62.3175218462049	0.793957501754516	0.0265545169316367
ENSG00000156261	10694	CCT8	chaperonin containing TCP1 subunit 8	2206.52634505312	-0.18688538942289	0.0270753494408853
ENSG00000138944	85352	KIAA1644	KIAA1644	2227.95097875851	0.160613516217117	0.0273183373196272
ENSG00000175602	11007	CCDC85B	coiled-coil domain containing 85B	724.933122236799	0.244106666389957	0.0273183373196272
ENSG00000101367	22919	MAPRE1	microtubule associated protein RP/EB family member 1	2101.60348295408	-0.197710264078416	0.0274603892729415
ENSG00000085733	2017	CTTN	cortactin	2985.98437836931	0.201376705237605	0.0275553726654551
ENSG00000128567	5420	PODXL	podocalyxin like	1559.0301333576	-0.203057245964765	0.0275553726654551
ENSG00000173705	26032	SUSD5	sushi domain containing 5	537.330434356354	-0.268940266483772	0.0276371222619869
ENSG00000272333	9757	KMT2B	lysine methyltransferase 2B	325.604027746952	0.44829082776438	0.0276371222619869
ENSG00000065526	23013	SPEN	spen family transcriptional repressor	489.133145354908	0.352969428459298	0.0281054394798138
ENSG00000138385	6741	SSB	Sjogren syndrome antigen B	968.697360269738	-0.218064180348783	0.0281576908041972
ENSG00000253729	5591	PRKDC	protein kinase, DNA-activated, catalytic polypeptide	3945.64621174755	0.175638028415426	0.0282070364981371
ENSG00000105894	5764	PTN	pleiotrophin	2051.22723755195	-0.184701564137031	0.0282125172357642
ENSG00000185262	283991	UBALD2	UBA like domain containing 2	621.051609203358	0.256050722844504	0.0283428593922122
ENSG00000138303	51008	ASCC1	activating signal cointegrator 1 complex subunit 1	186.095791126408	-0.440107423815699	0.0283661607271257
ENSG00000186469	54331	GNG2	G protein subunit gamma 2	1194.48020671953	-0.250812817871153	0.0284379596953699
ENSG00000188938	158293	FAM120AOS	family with sequence similarity 120A opposite strand	270.789586469924	-0.35797252272454	0.0285233086757126
ENSG00000149218	23052	ENDOD1	endonuclease domain containing 1	516.351520115543	-0.267200850679085	0.0286390016255923
ENSG00000103966	30844	EHD4	EH domain containing 4	429.668277381047	0.301216898242022	0.0287204233027718
ENSG00000130827	55558	PLXNA3	plexin A3	209.997598213023	0.572044282022525	0.0287503388337426
ENSG00000114209	11235	PDCD10	programmed cell death 10	302.983920767329	-0.375936566931221	0.0287759045641924
ENSG00000139880	64403	CDH24	cadherin 24	90.0069417315293	0.656586470283416	0.0288401488319208
ENSG00000249115	23354	HAUS5	HAUS augmin like complex subunit 5	204.353847082392	0.445975278711183	0.0288401488319208
ENSG00000110321	1982	EIF4G2	eukaryotic translation initiation factor 4 gamma 2	9001.50359979753	-0.117031225403715	0.0290345321560925
ENSG00000143933	805	CALM2	calmodulin 2	3596.69095802193	-0.201545755815085	0.0290731604569535
ENSG00000214654	NA	NA	NA	57.9202639636439	-0.799400183538472	0.0291810882065797
ENSG00000099250	8829	NRP1	neuropilin 1	687.2344484238	-0.241923917675553	0.0292253114257269
ENSG00000136758	10730	YME1L1	YME1 like 1 ATPase	1295.52786032004	-0.187983849821715	0.0293039014996436
ENSG00000025772	10953	TOMM34	translocase of outer mitochondrial membrane 34	688.203217427096	-0.25269279980701	0.0293306635578082
ENSG00000112245	7803	PTP4A1	protein tyrosine phosphatase type IVA, member 1	1450.17614140451	-0.239055287073091	0.0293306635578082
ENSG00000146067	54540	FAM193B	family with sequence similarity 193 member B	128.556475169738	0.551935255883279	0.0293306635578082
ENSG00000162804	25992	SNED1	sushi, nidogen and EGF like domains 1	363.268935978025	0.382510040001705	0.0293306635578082
ENSG00000162298	84447	SYVN1	synoviolin 1	432.373646979582	0.302754276470758	0.0293741304894666
ENSG00000121690	91614	DEPDC7	DEP domain containing 7	362.095941249573	0.324086175847653	0.029698494909889
ENSG00000167700	113655	MFSD3	major facilitator superfamily domain containing 3	171.41013832248	0.444640028037485	0.0299685903056844
ENSG00000168488	11273	ATXN2L	ataxin 2 like	1093.33284160333	0.22350744810809	0.0301016760600705
ENSG00000114978	55233	MOB1A	MOB kinase activator 1A	1566.08487901705	-0.20050274543667	0.0305506999539492
ENSG00000182957	221178	SPATA13	spermatogenesis associated 13	1045.2275662113	0.239910408389982	0.0306737702427542
ENSG00000074755	23140	ZZEF1	zinc finger ZZ-type and EF-hand domain containing 1	406.000089437184	0.31685247673193	0.0306860370027021
ENSG00000067445	7216	TRO	trophinin	271.260405917456	0.381853827324167	0.0307148191689096
ENSG00000100220	51493	RTCB	RNA 2',3'-cyclic phosphate and 5'-OH ligase	1254.09025878665	-0.189481475325769	0.0310027179772319
ENSG00000163931	7086	TKT	transketolase	5325.84053962355	0.120896746003557	0.0310027179772319
ENSG00000072864	54820	NDE1	nudE neurodevelopment protein 1	472.651678980628	-0.297283348367026	0.0310868380220945
ENSG00000119396	51552	RAB14	RAB14, member RAS oncogene family	1507.97206058222	-0.191008995802889	0.0311941846870832
ENSG00000103335	9780	PIEZO1	piezo type mechanosensitive ion channel component 1	1261.84741495622	0.201298479601604	0.0312848899199132
ENSG00000138795	51176	LEF1	lymphoid enhancer binding factor 1	608.384183349926	-0.26820475291514	0.0314118746231635
ENSG00000122406	6125	RPL5	ribosomal protein L5	2589.13788286477	-0.184609602410979	0.03158637914664
ENSG00000084234	334	APLP2	amyloid beta precursor like protein 2	4882.47713867479	-0.128555613821238	0.0318639135501409
ENSG00000152422	7518	XRCC4	X-ray repair cross complementing 4	110.182302582977	-0.572208438492834	0.0318639135501409
ENSG00000197119	123096	SLC25A29	solute carrier family 25 member 29	118.144682122	0.618768157721124	0.0319281009827246
ENSG00000170581	6773	STAT2	signal transducer and activator of transcription 2	540.428098638353	0.306573644699567	0.0320898580689985
ENSG00000156026	90550	MCU	mitochondrial calcium uniporter	225.13461629841	-0.407185650957807	0.03221127416263
ENSG00000076053	10179	RBM7	RNA binding motif protein 7	43.8241839975154	-0.898115308580938	0.0322500656818218
ENSG00000076382	10615	SPAG5	sperm associated antigen 5	847.071254233381	-0.220159693782366	0.0322500656818218
ENSG00000172175	10892	MALT1	MALT1 paracaspase	874.12312767143	-0.220961374162513	0.0322500656818218
ENSG00000099904	29801	ZDHHC8	zinc finger DHHC-type containing 8	403.728750386502	0.354252000689345	0.0323183600850338
ENSG00000187164	57698	SHTN1	shootin 1	1048.66809615903	0.212401019330425	0.0323183600850338
ENSG00000160917	10898	CPSF4	cleavage and polyadenylation specific factor 4	245.364238072625	0.388994982158019	0.0323597127115296
ENSG00000272391	100101267	POM121C	POM121 transmembrane nucleoporin C	423.849819422485	0.303024187186665	0.0323725232344099
ENSG00000147439	55909	BIN3	bridging integrator 3	397.947453891945	0.298979998212456	0.0324697725428262
ENSG00000165476	221035	REEP3	receptor accessory protein 3	800.262613056608	-0.257191037474588	0.0324697725428262
ENSG00000143321	3068	HDGF	heparin binding growth factor	2447.97447858584	-0.185573439412009	0.0324945894608999
ENSG00000181513	79777	ACBD4	acyl-CoA binding domain containing 4	40.2316571388188	0.921357681021493	0.0324945894608999
ENSG00000196531	4666	NACA	nascent polypeptide-associated complex alpha subunit	2402.16939021563	-0.152755820649846	0.0325701257804065
ENSG00000131149	23199	GSE1	Gse1 coiled-coil protein	582.22412203151	0.257337500206692	0.0328719093309952
ENSG00000151414	140609	NEK7	NIMA related kinase 7	769.358968578097	-0.274668718118913	0.0328719093309952
ENSG00000061676	10787	NCKAP1	NCK associated protein 1	2311.1342508408	-0.16162762175212	0.0330555652511144
ENSG00000235162	387882	C12orf75	chromosome 12 open reading frame 75	646.580617128944	-0.357378357728913	0.0331202138955514
ENSG00000116132	5396	PRRX1	paired related homeobox 1	876.174996858196	-0.227142410717884	0.033427638806822
ENSG00000130513	9518	GDF15	growth differentiation factor 15	326.740525974631	0.374699544622684	0.0334742266593133
ENSG00000135018	29979	UBQLN1	ubiquilin 1	1625.96080568954	-0.165593450165425	0.0334742266593133
ENSG00000151694	6868	ADAM17	ADAM metallopeptidase domain 17	369.417179854937	-0.303948851629194	0.0334742266593133
ENSG00000153147	8467	SMARCA5	SWI/SNF related, matrix associated, actin dependent regulator of chromatin, subfamily a, member 5	1334.25186282503	-0.193669287102635	0.0334742266593133
ENSG00000162522	57648	KIAA1522	KIAA1522	318.9854897659	0.322201662368445	0.0334742266593133
ENSG00000061938	10188	TNK2	tyrosine kinase non receptor 2	238.465423965545	0.399030414394942	0.0334782559404393
ENSG00000225614	84627	ZNF469	zinc finger protein 469	85.991019960775	0.652360740978156	0.0338106183094652
ENSG00000165487	221154	MICU2	mitochondrial calcium uptake 2	310.469397848771	-0.333138180234457	0.0339591883819736
ENSG00000121753	576	ADGRB2	adhesion G protein-coupled receptor B2	280.934691262566	0.351993964714524	0.0340295837084631
ENSG00000184343	26576	SRPK3	SRSF protein kinase 3	38.7089229790594	1.0207914084503	0.034058981602989
ENSG00000128789	56984	PSMG2	proteasome assembly chaperone 2	336.219189718104	-0.347237774252426	0.0340789416183233
ENSG00000006634	10926	DBF4	DBF4 zinc finger	544.050728270116	-0.260617503445475	0.0343377393765448
ENSG00000103769	8766	RAB11A	RAB11A, member RAS oncogene family	864.414661024349	-0.239347327838237	0.0348059611070544
ENSG00000107566	10613	ERLIN1	ER lipid raft associated 1	905.589567155492	-0.21865562825228	0.0349105696767047
ENSG00000135316	10492	SYNCRIP	synaptotagmin binding cytoplasmic RNA interacting protein	1956.34541176181	-0.183064637492611	0.0349105696767047
ENSG00000170515	5036	PA2G4	proliferation-associated 2G4	1653.72754127838	-0.191088691201109	0.0349105696767047
ENSG00000182979	9112	MTA1	metastasis associated 1	311.879661393152	0.370057150632244	0.0349105696767047
ENSG00000184465	253769	WDR27	WD repeat domain 27	88.1658287427976	0.716158024178337	0.0349105696767047
ENSG00000145794	84466	MEGF10	multiple EGF like domains 10	228.747168119843	0.41623236469068	0.0351741108304536
ENSG00000138757	9908	G3BP2	G3BP stress granule assembly factor 2	1732.99123715425	-0.190874806224694	0.0362464787802776
ENSG00000169710	2194	FASN	fatty acid synthase	7644.66718142253	0.20144053597262	0.0362763427624945
ENSG00000139278	11010	GLIPR1	GLI pathogenesis related 1	97.1902241508567	-0.574193425573116	0.0363255795795893
ENSG00000152284	83439	TCF7L1	transcription factor 7 like 1	130.10134679429	0.504396102068862	0.0363255795795893
ENSG00000089009	6128	RPL6	ribosomal protein L6	1598.56939832957	-0.166158381442791	0.0364916675783891
ENSG00000066923	10734	STAG3	stromal antigen 3	104.77899293916	0.618348037735758	0.0365246379995022
ENSG00000064886	1117	CHI3L2	chitinase 3 like 2	67.8204349024806	-0.71821960084996	0.0365741463094779
ENSG00000106771	23731	TMEM245	transmembrane protein 245	1329.74371275613	-0.190900475707871	0.0365741463094779
ENSG00000107372	7763	ZFAND5	zinc finger AN1-type containing 5	1411.50919462049	-0.171512068462711	0.0367987405048664
ENSG00000149716	220064	ORAOV1	oral cancer overexpressed 1	106.76172409789	0.554003802833174	0.0367987405048664
ENSG00000154493	118611	C10orf90	chromosome 10 open reading frame 90	305.832590247748	0.382804538544978	0.0367987405048664
ENSG00000088448	55608	ANKRD10	ankyrin repeat domain 10	272.467307510279	0.3966392058356	0.0369398825797206
ENSG00000064102	55726	INTS13	integrator complex subunit 13	332.515127618524	-0.312942694045078	0.0370916889775047
ENSG00000115760	57448	BIRC6	baculoviral IAP repeat containing 6	977.4161686049	0.215197622289963	0.0370916889775047
ENSG00000152558	114908	TMEM123	transmembrane protein 123	725.328601468465	-0.254448996777981	0.0370916889775047
ENSG00000222009	149478	BTBD19	BTB domain containing 19	43.8808370720638	0.972227383523287	0.0370916889775047
ENSG00000107281	56654	NPDC1	neural proliferation, differentiation and control 1	85.1954534471731	0.680754303323038	0.0371543383366956
ENSG00000142173	1292	COL6A2	collagen type VI alpha 2 chain	4155.7702552333	0.136557085067608	0.0371543383366956
ENSG00000176155	284001	CCDC57	coiled-coil domain containing 57	385.530469285066	0.679802531159274	0.0371543383366956
ENSG00000103197	7249	TSC2	tuberous sclerosis 2	645.852395448651	0.307019200939541	0.0372516394722966
ENSG00000160972	84988	PPP1R16A	protein phosphatase 1 regulatory subunit 16A	103.668919220667	0.577033826234534	0.0372516394722966
ENSG00000104365	3551	IKBKB	inhibitor of nuclear factor kappa B kinase subunit beta	227.902215792336	0.394075234933362	0.0372537873675573
ENSG00000105810	1021	CDK6	cyclin dependent kinase 6	747.534943332375	0.240464178876287	0.0372537873675573
ENSG00000078061	369	ARAF	A-Raf proto-oncogene, serine/threonine kinase	314.650573552247	0.336415040252678	0.0374636828640918
ENSG00000163565	3428	IFI16	interferon gamma inducible protein 16	2411.22813202131	-0.160383565351006	0.0378315591345133
ENSG00000115286	374291	NDUFS7	NADH:ubiquinone oxidoreductase core subunit S7	73.6200172416905	0.677289858293027	0.0382937559190517
ENSG00000115365	10314	LANCL1	LanC like 1	1432.06273493585	-0.187977048326454	0.0383860390170299
ENSG00000177595	55367	PIDD1	p53-induced death domain protein 1	198.470906616338	0.455132685744556	0.0383860390170299
ENSG00000011422	5329	PLAUR	plasminogen activator, urokinase receptor	354.048432388978	-0.314832373991381	0.0388595098437765
ENSG00000079931	26002	MOXD1	monooxygenase DBH like 1	157.655953918662	-0.452013031323107	0.039029836298506
ENSG00000054267	51742	ARID4B	AT-rich interaction domain 4B	626.488709085269	-0.240235784585997	0.0397934462634262
ENSG00000176142	55254	TMEM39A	transmembrane protein 39A	240.076769202991	0.357729598743602	0.0398056533340136
ENSG00000174306	23051	ZHX3	zinc fingers and homeoboxes 3	727.691550102946	0.24830555136962	0.0398558157525634
ENSG00000164543	9263	STK17A	serine/threonine kinase 17a	1393.9990690911	-0.194068284272162	0.0399978171022172
ENSG00000089006	27131	SNX5	sorting nexin 5	1269.90718717617	-0.189184028562324	0.0400544091052136
ENSG00000204946	100289678	ZNF783	zinc finger family member 783	146.793687248411	0.490858173747233	0.0404409796452655
ENSG00000129667	79651	RHBDF2	rhomboid 5 homolog 2	62.7713906545735	0.696737628044992	0.0405658759879698
ENSG00000113575	5515	PPP2CA	protein phosphatase 2 catalytic subunit alpha	1763.62578677568	-0.198661958172232	0.0406522245826371
ENSG00000077380	1781	DYNC1I2	dynein cytoplasmic 1 intermediate chain 2	792.814923267745	-0.216748637911518	0.0407657586200029
ENSG00000136536	64844	2007-03-01	membrane associated ring-CH-type finger 7	905.389927251216	-0.214406998564146	0.0409071812683253
ENSG00000152904	9453	GGPS1	geranylgeranyl diphosphate synthase 1	273.545610883449	-0.345067762015395	0.0414489040400872
ENSG00000160953	84939	MUM1	melanoma associated antigen (mutated) 1	233.887693806882	0.370260372375539	0.0416322896492936
ENSG00000163013	150726	FBXO41	F-box protein 41	148.249934047381	0.492433505190452	0.0416322896492936
ENSG00000231607	8847	DLEU2	deleted in lymphocytic leukemia 2 (non-protein coding)	91.32933489213	-0.600455593016538	0.0418876960072575
ENSG00000102125	6901	TAZ	tafazzin	186.148833993304	0.452876008970386	0.0422852908344042
ENSG00000141552	51529	ANAPC11	anaphase promoting complex subunit 11	666.744940235366	0.228201765223705	0.0428458231877665
ENSG00000119203	51692	CPSF3	cleavage and polyadenylation specific factor 3	858.657996693672	-0.225181778450658	0.0429620941730123
ENSG00000137575	6386	SDCBP	syndecan binding protein	1263.12518757081	-0.209526017023667	0.0429938678851723
ENSG00000024526	55635	DEPDC1	DEP domain containing 1	650.17654243436	-0.279901054004256	0.0430050665840578
ENSG00000163466	10109	ARPC2	actin related protein 2/3 complex subunit 2	2228.08018115476	-0.176460131852759	0.043060999985347
ENSG00000187239	23048	FNBP1	formin binding protein 1	127.206501458542	0.497200112676686	0.043060999985347
ENSG00000073169	83642	SELENOO	selenoprotein O	176.901352189065	0.471842619802664	0.0434595260223962
ENSG00000187678	81848	SPRY4	sprouty RTK signaling antagonist 4	2938.40275517746	0.218404900882339	0.0436764648487577
ENSG00000172167	27085	MTBP	MDM2 binding protein	185.577134723037	-0.456823479728686	0.0440395116701313
ENSG00000164032	3015	H2AFZ	H2A histone family member Z	3726.19622192708	-0.157420741859794	0.0441109856351078
ENSG00000172757	1072	CFL1	cofilin 1	7464.81940197936	-0.124593096023269	0.0445814078510103
ENSG00000075292	27332	ZNF638	zinc finger protein 638	997.598012618609	-0.190988004898028	0.0447264251401931
ENSG00000121440	23024	PDZRN3	PDZ domain containing ring finger 3	286.545075352064	-0.360849062501993	0.0448436823140919
ENSG00000105849	221830	TWISTNB	TWIST neighbor	715.7753139392	-0.220872226457203	0.0451833275227784
ENSG00000181163	4869	NPM1	nucleophosmin	3748.256996804	-0.137652427255361	0.0455059359489757
ENSG00000116199	9917	FAM20B	FAM20B, glycosaminoglycan xylosylkinase	1112.39653890025	-0.210592095213092	0.0456198214013383
ENSG00000107331	20	ABCA2	ATP binding cassette subfamily A member 2	566.777507287428	0.284157465781433	0.0456833294837647
ENSG00000170677	9306	SOCS6	suppressor of cytokine signaling 6	462.466659988056	-0.274992959077791	0.0458792990231855
ENSG00000164896	10922	FASTK	Fas activated serine/threonine kinase	612.249606567037	0.246478516220513	0.0462696302507571
ENSG00000132676	7818	DAP3	death associated protein 3	1449.40050508626	-0.167243353402959	0.0465293639908943
ENSG00000235750	9674	KIAA0040	KIAA0040	307.2836019502	-0.321792163776591	0.0466044056038568
ENSG00000141429	2589	GALNT1	polypeptide N-acetylgalactosaminyltransferase 1	770.700883638947	-0.236722243567631	0.0466707635175936
ENSG00000068796	3796	KIF2A	kinesin family member 2A	826.57746997763	-0.210019843008375	0.0468280527815917
ENSG00000123975	1164	CKS2	CDC28 protein kinase regulatory subunit 2	423.646480033325	-0.281715904055793	0.0468280527815917
ENSG00000148572	29982	NRBF2	nuclear receptor binding factor 2	138.5855838964	-0.464161072224967	0.0476218275592691
ENSG00000126561	6776	STAT5A	signal transducer and activator of transcription 5A	38.2470582704107	0.908093281663915	0.0477818225037219
ENSG00000141503	50488	MINK1	misshapen like kinase 1	453.588718916125	0.274516839534197	0.0478516580639813
ENSG00000072832	1400	CRMP1	collapsin response mediator protein 1	63.1042274485719	0.705823400494821	0.0486042136462827
ENSG00000132635	64773	PCED1A	PC-esterase domain containing 1A	480.707499997779	0.332357490533856	0.0486042136462827
ENSG00000143341	83872	HMCN1	hemicentin 1	3164.91150691576	0.191503112108143	0.0486042136462827
ENSG00000198830	3151	HMGN2	high mobility group nucleosomal binding domain 2	2359.47264788029	-0.144870503652124	0.0486042136462827
ENSG00000095794	1390	CREM	cAMP responsive element modulator	106.756051412936	-0.524374308752646	0.048605207851433
ENSG00000136878	10868	USP20	ubiquitin specific peptidase 20	141.638377741162	0.463414463239159	0.0489961589333431
ENSG00000070214	23446	SLC44A1	solute carrier family 44 member 1	1156.85793974934	-0.198331137136971	0.0491153193761239
ENSG00000171490	26156	RSL1D1	ribosomal L1 domain containing 1	1121.1815419349	-0.193453665699511	0.049132592710357
ENSG00000147679	84294	UTP23	UTP23, small subunit processome component	221.671122948728	-0.372080891800524	0.0491686805745301
ENSG00000171298	2548	GAA	glucosidase alpha, acid	1258.03661109469	0.193805906136995	0.0493835706071325
ENSG00000061273	51564	HDAC7	histone deacetylase 7	186.496858117258	0.443922055454142	0.0496744028556515
ENSG00000173848	10276	NET1	neuroepithelial cell transforming 1	287.921994224701	-0.315799840600566	0.0496744028556515
ENSG00000188612	6613	SUMO2	small ubiquitin-like modifier 2	762.262520120789	-0.247298718040188	0.0496744028556515

## Sheet: LN229 - C2 - Table S2
Supplementary Table S2. The list shows the genes that were differentially expressed in THTMP vs TMZ in the cell type analysis using DESeq2
ENSEMBL	ENTREZID	SYMBOL	GENENAME	baseMean	log2FoldChange	padj
ENSG00000124762	1026	CDKN1A	cyclin dependent kinase inhibitor 1A	744.074834925459	-1.38268232129719	4.21931585445334e-76
ENSG00000163235	7039	TGFA	transforming growth factor alpha	2668.29035306519	-0.819825458206114	3.58499469525502e-47
ENSG00000100139	85377	MICALL1	MICAL like 1	1103.6691922554	-0.900166102323235	1.88611420241276e-37
ENSG00000049130	4254	KITLG	KIT ligand	387.895194461005	-1.44096386187113	9.23178563626522e-32
ENSG00000048392	50484	RRM2B	ribonucleotide reductase regulatory TP53 inducible subunit M2B	677.099128111702	-0.808041284445957	2.58939440071294e-22
ENSG00000105519	828	CAPS	calcyphosine	527.098745844261	-0.904733325244405	1.29664970514225e-21
ENSG00000115902	6509	SLC1A4	solute carrier family 1 member 4	5813.89072130966	0.408276109262561	2.48266188753217e-20
ENSG00000117318	3399	ID3	inhibitor of DNA binding 3, HLH protein	665.775121633302	-0.760712311423381	4.32631790850003e-19
ENSG00000136235	10457	GPNMB	glycoprotein nmb	3926.61232322921	0.428697120292985	9.16531248592234e-17
ENSG00000171617	8507	ENC1	ectodermal-neural cortex 1	1080.94132741861	-0.54999637486944	8.60381322605407e-16
ENSG00000151914	667	DST	dystonin	2256.11874386371	0.562599401002728	1.14585062394172e-15
ENSG00000124942	79026	AHNAK	AHNAK nucleoprotein	3740.91332396984	0.602053484499221	1.38195349907563e-15
ENSG00000134574	1643	DDB2	damage specific DNA binding protein 2	1122.37294678068	-0.549639534085298	2.25366821617668e-15
ENSG00000141564	57521	RPTOR	regulatory associated protein of MTOR complex 1	1732.00870149101	0.501028327620164	2.30131845949891e-15
ENSG00000148848	8038	ADAM12	ADAM metallopeptidase domain 12	1250.88234788808	0.571605738573207	2.41348800579672e-15
ENSG00000265972	10628	TXNIP	thioredoxin interacting protein	1042.408604828	-0.559956106775312	9.83387799885185e-15
ENSG00000178209	5339	PLEC	plectin	7362.15006277836	0.530524618662334	5.05941107906516e-14
ENSG00000127418	53834	FGFRL1	fibroblast growth factor receptor-like 1	1440.17768056001	-0.479411733149706	2.39775510420831e-13
ENSG00000172667	64393	ZMAT3	zinc finger matrin-type 3	651.87934155906	-0.684636773735459	4.91804131255123e-13
ENSG00000078237	57103	TIGAR	TP53 induced glycolysis regulatory phosphatase	455.475933288084	-0.806095878758355	6.15208414983683e-13
ENSG00000196208	9687	GREB1	growth regulation by estrogen in breast cancer 1	155.224209345992	-1.15904188897143	1.06436674641005e-12
ENSG00000161091	126321	MFSD12	major facilitator superfamily domain containing 12	5510.85939225075	0.313681038418446	2.18679638971257e-12
ENSG00000100234	7078	TIMP3	TIMP metallopeptidase inhibitor 3	14841.7838929105	0.275769027258375	8.01417307170324e-12
ENSG00000110900	441631	TSPAN11	tetraspanin 11	248.796255465372	-0.874341875224452	8.01417307170324e-12
ENSG00000158008	2134	EXTL1	exostosin like glycosyltransferase 1	3322.49185189401	0.356161755349587	1.35635503853065e-11
ENSG00000185088	51065	RPS27L	ribosomal protein S27 like	758.348775524998	-0.617155285074423	1.35635503853065e-11
ENSG00000269821	10984	KCNQ1OT1	KCNQ1 opposite strand/antisense transcript 1 (non-protein coding)	348.347751186376	1.03246634915822	1.36322136211458e-11
ENSG00000167196	26263	FBXO22	F-box protein 22	611.098470609561	-0.582383059311111	1.56133464197513e-11
ENSG00000176438	161176	SYNE3	spectrin repeat containing nuclear envelope family member 3	882.921039029737	0.556776265005	1.66640505540159e-11
ENSG00000125968	3397	ID1	inhibitor of DNA binding 1, HLH protein	818.470515323062	-0.508749990660222	2.169261362567e-11
ENSG00000136231	10643	IGF2BP3	insulin like growth factor 2 mRNA binding protein 3	936.704530702742	0.483863418661389	5.90514052857481e-11
ENSG00000063660	2817	GPC1	glypican 1	1371.12865422414	-0.414169122179563	2.13115408877859e-10
ENSG00000143341	83872	HMCN1	hemicentin 1	3164.91150691576	0.46034021562158	3.83461262702654e-10
ENSG00000131389	6533	SLC6A6	solute carrier family 6 member 6	1427.88047327951	0.411264008065198	4.09264111451486e-10
ENSG00000158710	8407	TAGLN2	transgelin 2	3922.34646504556	-0.342191813839579	4.9209696123424e-10
ENSG00000054148	29085	PHPT1	phosphohistidine phosphatase 1	404.487851330984	-0.635242652374879	8.95955667860738e-10
ENSG00000103257	8140	SLC7A5	solute carrier family 7 member 5	7976.64732543239	0.293730616660331	2.79852338182428e-09
ENSG00000041982	3371	TNC	tenascin C	16290.870936118	0.363322986659579	3.24799093002607e-09
ENSG00000112159	23195	MDN1	midasin AAA ATPase 1	636.834357440174	0.577913427422456	3.24799093002607e-09
ENSG00000105290	333	APLP1	amyloid beta precursor like protein 1	352.317984779726	-0.650140412445954	7.38719389824232e-09
ENSG00000173821	57674	RNF213	ring finger protein 213	1554.22918955353	0.466420168296837	1.33773213784805e-08
ENSG00000187678	81848	SPRY4	sprouty RTK signaling antagonist 4	2938.40275517746	0.475523149368569	1.64122540356925e-08
ENSG00000150961	9871	SEC24D	SEC24 homolog D, COPII coat complex component	615.00488374386	0.505040360819017	2.32373634863494e-08
ENSG00000163932	5580	PRKCD	protein kinase C delta	2182.90235468043	0.321268717434522	2.40263009958852e-08
ENSG00000198743	6526	SLC5A3	solute carrier family 5 member 3	3138.83876966303	0.365305857242226	2.52461026035189e-08
ENSG00000105372	6223	RPS19	ribosomal protein S19	2484.22416495402	-0.349726356080918	2.80662389889727e-08
ENSG00000124225	56937	PMEPA1	prostate transmembrane protein, androgen induced 1	6634.26312436949	-0.250637986292945	3.42310732950484e-08
ENSG00000253729	5591	PRKDC	protein kinase, DNA-activated, catalytic polypeptide	3945.64621174755	0.350169268793629	3.84983158614374e-08
ENSG00000123384	4035	LRP1	LDL receptor related protein 1	969.241406272152	0.552882692953638	4.2322091248605e-08
ENSG00000121440	23024	PDZRN3	PDZ domain containing ring finger 3	286.545075352064	-0.732031921787064	5.13211302461134e-08
ENSG00000145860	153830	RNF145	ring finger protein 145	1674.32464548022	-0.355905152763233	6.15724554547756e-08
ENSG00000111859	4739	NEDD9	neural precursor cell expressed, developmentally down-regulated 9	329.478372370387	-0.656293680712359	6.88884275374368e-08
ENSG00000181019	1728	NQO1	NAD(P)H quinone dehydrogenase 1	9626.27557775588	0.260259854480345	8.08182508850916e-08
ENSG00000197102	1778	DYNC1H1	dynein cytoplasmic 1 heavy chain 1	2605.31856970035	0.452285291787554	8.08182508850916e-08
ENSG00000182957	221178	SPATA13	spermatogenesis associated 13	1045.2275662113	0.471060172023351	8.95218184653732e-08
ENSG00000179222	9500	MAGED1	MAGE family member D1	1952.47923642195	0.339396958065474	1.64606289452125e-07
ENSG00000167548	8085	KMT2D	lysine methyltransferase 2D	668.174845518914	0.655349774165225	1.67466438548923e-07
ENSG00000197081	3482	IGF2R	insulin like growth factor 2 receptor	1366.31761283574	0.367834798610613	1.79003371452633e-07
ENSG00000084112	54434	SSH1	slingshot protein phosphatase 1	1833.17150547341	0.393766792425258	1.83944283515015e-07
ENSG00000187098	4286	MITF	melanogenesis associated transcription factor	541.899291973122	-0.527477685902049	2.29395155293425e-07
ENSG00000100097	3956	LGALS1	galectin 1	10414.4951220692	-0.293348186741422	2.4515323580447e-07
ENSG00000167191	51704	GPRC5B	G protein-coupled receptor class C group 5 member B	202.113693861889	-0.800248547296372	2.86216764549371e-07
ENSG00000197535	4644	MYO5A	myosin VA	2828.76457329165	0.28790584676352	3.13633555674155e-07
ENSG00000117632	3925	STMN1	stathmin 1	4035.70668276346	-0.265690436017728	3.78413948820808e-07
ENSG00000135862	3915	LAMC1	laminin subunit gamma 1	7826.12010197398	0.300659762560548	4.11809839896441e-07
ENSG00000166130	121457	IKBIP	IKBKB interacting protein	448.080863906561	-0.559178243881529	4.11809839896441e-07
ENSG00000157766	176	ACAN	aggrecan	514.001964371467	0.495120032532826	6.18698774285854e-07
ENSG00000145632	10769	PLK2	polo like kinase 2	1626.99256378515	-0.342263678968836	7.12698632474925e-07
ENSG00000147604	6129	RPL7	ribosomal protein L7	2546.72176581624	-0.276348284018098	7.34234171569055e-07
ENSG00000198300	5178	PEG3	paternally expressed 3	395.280695451361	0.547858913588432	8.07345143667365e-07
ENSG00000196576	23654	PLXNB2	plexin B2	1736.39145569737	-0.313612929811636	9.20791891165511e-07
ENSG00000174307	23612	PHLDA3	pleckstrin homology like domain family A member 3	844.070677422375	-0.446110302794877	1.30777154360283e-06
ENSG00000177606	3725	JUN	Jun proto-oncogene, AP-1 transcription factor subunit	2267.04795824619	0.376759336074864	1.38390854121573e-06
ENSG00000164611	9232	PTTG1	pituitary tumor-transforming 1	805.55893072431	-0.389513111274198	1.50100957063886e-06
ENSG00000101638	29906	ST8SIA5	ST8 alpha-N-acetyl-neuraminide alpha-2,8-sialyltransferase 5	2730.17859036973	0.410196803372338	1.57924555823505e-06
ENSG00000178904	147991	DPY19L3	dpy-19 like 3 (C. elegans)	650.228089960158	0.479371352853545	1.57924555823505e-06
ENSG00000147459	80005	DOCK5	dedicator of cytokinesis 5	1231.53153374068	0.490438765887978	1.68854264641589e-06
ENSG00000135679	4193	MDM2	MDM2 proto-oncogene	722.700131119391	-0.405422721718384	1.76393001756744e-06
ENSG00000141574	6398	SECTM1	secreted and transmembrane 1	689.387973681935	0.423544130519035	2.62436547687415e-06
ENSG00000115758	4953	ODC1	ornithine decarboxylase 1	768.244295433789	-0.457895707833046	2.64589595319125e-06
ENSG00000128731	8924	HERC2	HECT and RLD domain containing E3 ubiquitin protein ligase 2	789.938226560943	0.442478249405621	3.3011578028142e-06
ENSG00000179583	4261	CIITA	class II major histocompatibility complex transactivator	689.903972215146	0.467240911204951	3.68125791394783e-06
ENSG00000172037	3913	LAMB2	laminin subunit beta 2	1546.86102410128	0.380146841537293	4.25039557078991e-06
ENSG00000153029	3140	MR1	major histocompatibility complex, class I-related	123.677895958581	-0.922565886304854	4.29990455746495e-06
ENSG00000183853	55243	KIRREL	kin of IRRE like (Drosophila)	3441.60572510774	0.235837731710815	4.91595052604799e-06
ENSG00000087074	23645	PPP1R15A	protein phosphatase 1 regulatory subunit 15A	822.125945606423	0.406857938652593	5.28915040655913e-06
ENSG00000233276	2876	GPX1	glutathione peroxidase 1	1523.83445536814	-0.336513274394005	5.28915040655913e-06
ENSG00000128342	3976	LIF	LIF, interleukin 6 family cytokine	527.316670702415	-0.503415600357911	6.88820298675096e-06
ENSG00000083857	2195	FAT1	FAT atypical cadherin 1	2101.67290686001	0.377412588066431	8.05995004248699e-06
ENSG00000185920	5727	PTCH1	patched 1	571.447384880907	0.450199737930982	8.59811968576523e-06
ENSG00000115760	57448	BIRC6	baculoviral IAP repeat containing 6	977.4161686049	0.372375196407042	8.59951768935635e-06
ENSG00000165029	19	ABCA1	ATP binding cassette subfamily A member 1	234.332615433279	-0.639686980170154	8.59951768935635e-06
ENSG00000148773	4288	MKI67	marker of proliferation Ki-67	4764.70546200164	0.322638899892096	8.68578873949361e-06
ENSG00000189067	9516	LITAF	lipopolysaccharide induced TNF factor	988.748763036198	-0.348935446620495	9.56658941961729e-06
ENSG00000072310	6720	SREBF1	sterol regulatory element binding transcription factor 1	809.603398683245	-0.424205880511069	1.16582388133073e-05
ENSG00000164543	9263	STK17A	serine/threonine kinase 17a	1393.9990690911	-0.331450322399103	1.253412003951e-05
ENSG00000082293	1310	COL19A1	collagen type XIX alpha 1 chain	1002.79567518768	0.433892660702303	1.27075539839414e-05
ENSG00000158856	2039	DMTN	dematin actin binding protein	241.306700831051	0.604480180205618	1.30281745108791e-05
ENSG00000136111	9882	TBC1D4	TBC1 domain family member 4	437.86258216672	0.477161276154424	1.66638071585903e-05
ENSG00000064300	4804	NGFR	nerve growth factor receptor	2220.65654156178	-0.306174841906117	1.76031589331206e-05
ENSG00000145012	4026	LPP	LIM domain containing preferred translocation partner in lipoma	1153.25062743368	0.345723163198738	1.82845435632325e-05
ENSG00000105875	29062	WDR91	WD repeat domain 91	592.341803076465	0.474043079974051	2.11367679983247e-05
ENSG00000147041	94122	SYTL5	synaptotagmin like 5	93.3858756446141	-0.948314317246277	2.11367679983247e-05
ENSG00000163659	25976	TIPARP	TCDD inducible poly(ADP-ribose) polymerase	1464.84007095223	0.322208127991886	2.36035195102532e-05
ENSG00000173546	1464	CSPG4	chondroitin sulfate proteoglycan 4	4201.66935212399	0.263339529475118	2.44302639099964e-05
ENSG00000117143	6675	UAP1	UDP-N-acetylglucosamine pyrophosphorylase 1	858.211530838303	-0.35927981436551	2.53558537348975e-05
ENSG00000204256	6046	BRD2	bromodomain containing 2	2014.5629354364	0.300796658170931	2.58966404351827e-05
ENSG00000134318	9475	ROCK2	Rho associated coiled-coil containing protein kinase 2	2419.7852185108	0.262744884780461	2.85588032962195e-05
ENSG00000142798	3339	HSPG2	heparan sulfate proteoglycan 2	3248.53006192247	0.561103228179547	2.9439574696266e-05
ENSG00000198830	3151	HMGN2	high mobility group nucleosomal binding domain 2	2359.47264788029	-0.24481463548183	3.10448585836857e-05
ENSG00000163931	7086	TKT	transketolase	5325.84053962355	0.193638422703506	3.24951466991012e-05
ENSG00000170540	23204	ARL6IP1	ADP ribosylation factor like GTPase 6 interacting protein 1	2376.14586050168	-0.323970006713229	3.32234356332232e-05
ENSG00000054793	10079	ATP9A	ATPase phospholipid transporting 9A (putative)	994.008421232597	0.313105133554143	3.67594623653193e-05
ENSG00000092841	4637	MYL6	myosin light chain 6	2954.02504019342	-0.271562862720601	3.95394728131092e-05
ENSG00000064393	28996	HIPK2	homeodomain interacting protein kinase 2	797.764114924024	0.34426232128386	4.04246206275802e-05
ENSG00000204291	1306	COL15A1	collagen type XV alpha 1 chain	432.178044391454	0.529696966882275	4.87856631244001e-05
ENSG00000087245	4313	MMP2	matrix metallopeptidase 2	20645.66989392	0.192644195531509	5.36478930783043e-05
ENSG00000102313	347365	ITIH6	inter-alpha-trypsin inhibitor heavy chain family member 6	679.660575229131	0.413851748586004	5.36478930783043e-05
ENSG00000128989	10776	ARPP19	cAMP regulated phosphoprotein 19	2037.77315205497	-0.291922663497409	5.36478930783043e-05
ENSG00000101040	23613	ZMYND8	zinc finger MYND-type containing 8	1066.36047400503	0.316755529136386	7.89147959909267e-05
ENSG00000086758	10075	HUWE1	HECT, UBA and WWE domain containing 1, E3 ubiquitin protein ligase	2027.08968445449	0.402998270030106	7.98093305154572e-05
ENSG00000138166	1847	DUSP5	dual specificity phosphatase 5	163.832940591788	-0.69244352971057	7.98093305154572e-05
ENSG00000196547	4122	MAN2A2	mannosidase alpha class 2A member 2	676.253788899066	0.393015927766099	9.25728643318029e-05
ENSG00000143603	3782	KCNN3	potassium calcium-activated channel subfamily N member 3	430.071647105374	0.461216800736971	9.94234958126038e-05
ENSG00000112769	3910	LAMA4	laminin subunit alpha 4	4178.83336442029	0.26218008199558	0.000110513386411069
ENSG00000071991	28513	CDH19	cadherin 19	931.296469475648	-0.371210381604793	0.000118076379813827
ENSG00000079482	4983	OPHN1	oligophrenin 1	508.359134276257	-0.412385877077334	0.000118076379813827
ENSG00000168502	23255	MTCL1	microtubule crosslinking factor 1	540.038340054956	0.432622304674577	0.000118076379813827
ENSG00000076928	9138	ARHGEF1	Rho guanine nucleotide exchange factor 1	897.328879858042	0.340971981973471	0.000118413326787036
ENSG00000143669	1130	LYST	lysosomal trafficking regulator	1599.89408801551	0.299788975482302	0.00012703917247772
ENSG00000116991	57568	SIPA1L2	signal induced proliferation associated 1 like 2	1236.45943224196	0.297313183439399	0.000128142114993728
ENSG00000115380	2202	EFEMP1	EGF containing fibulin like extracellular matrix protein 1	920.566936228041	-0.322254589098578	0.000129324980575981
ENSG00000189403	3146	HMGB1	high mobility group box 1	2433.01238770938	-0.310832346484109	0.000129644223885972
ENSG00000146540	84310	C7orf50	chromosome 7 open reading frame 50	1057.60107460068	-0.321185548975446	0.00012970248028913
ENSG00000140400	4123	MAN2C1	mannosidase alpha class 2C member 1	290.815432782986	0.735105057293659	0.000141957258972568
ENSG00000185634	399694	SHC4	SHC adaptor protein 4	290.297843997737	-0.511797482418869	0.000148489844643476
ENSG00000131747	7153	TOP2A	topoisomerase (DNA) II alpha	4550.18028013502	-0.192839743814912	0.000150200978366902
ENSG00000130513	9518	GDF15	growth differentiation factor 15	326.740525974631	-0.527851102162959	0.000153449390090169
ENSG00000115461	3488	IGFBP5	insulin like growth factor binding protein 5	559.192573252506	-0.403407831311794	0.000155201672425738
ENSG00000100994	5834	PYGB	glycogen phosphorylase B	11875.3739396389	0.179840299510169	0.000156880919212736
ENSG00000157600	84187	TMEM164	transmembrane protein 164	506.74728942997	-0.389704403292724	0.000179987284210638
ENSG00000142937	6202	RPS8	ribosomal protein S8	3828.62318063605	-0.225166710639562	0.000185994818216343
ENSG00000115464	9736	USP34	ubiquitin specific peptidase 34	993.758547573336	0.348047515270409	0.000188448894666605
ENSG00000156453	5097	PCDH1	protocadherin 1	2573.09330339156	0.246152265649385	0.000188448894666605
ENSG00000103018	80777	CYB5B	cytochrome b5 type B	1396.89146935546	-0.280730649968676	0.000194186472773077
ENSG00000164880	26173	INTS1	integrator complex subunit 1	1458.8784148151	0.261364027617001	0.000194186472773077
ENSG00000197852	55924	FAM212B	family with sequence similarity 212 member B	1627.57775012922	0.272652265348999	0.000194952187332008
ENSG00000089154	10985	GCN1	GCN1, eIF2 alpha kinase activator homolog	927.811041420284	0.350130109791034	0.000209605670597127
ENSG00000167863	10476	ATP5H	ATP synthase, H+ transporting, mitochondrial Fo complex subunit D	558.895993660869	-0.37361436675142	0.000216693135390768
ENSG00000067064	3422	IDI1	isopentenyl-diphosphate delta isomerase 1	779.898213023888	-0.397199561809241	0.000248865753686638
ENSG00000115756	3241	HPCAL1	hippocalcin like 1	1511.07530992058	0.255907967742388	0.000250726803893755
ENSG00000074755	23140	ZZEF1	zinc finger ZZ-type and EF-hand domain containing 1	406.000089437184	0.453952694891986	0.000278554881857693
ENSG00000108175	57178	ZMIZ1	zinc finger MIZ-type containing 1	1241.74417887563	0.287700919000291	0.000301900506971449
ENSG00000198198	23334	SZT2	seizure threshold 2 homolog (mouse)	289.911124620148	0.696977347171614	0.000301900506971449
ENSG00000105968	94239	H2AFV	H2A histone family member V	2473.93352164095	-0.216439018112222	0.000328280695162174
ENSG00000107862	8729	GBF1	golgi brefeldin A resistant guanine nucleotide exchange factor 1	893.541892847117	0.361893448148684	0.000328280695162174
ENSG00000115738	3398	ID2	inhibitor of DNA binding 2, HLH protein	232.46360567367	-0.579088307323063	0.00035324455524484
ENSG00000183010	5831	PYCR1	pyrroline-5-carboxylate reductase 1	495.577788994855	0.404128886608168	0.000361506604797407
ENSG00000117152	5999	RGS4	regulator of G-protein signaling 4	294.587849004823	-0.495862735210664	0.000371541334154346
ENSG00000049860	3074	HEXB	hexosaminidase subunit beta	3509.8731498839	-0.214723549687177	0.000378105721068751
ENSG00000124098	116151	FAM210B	family with sequence similarity 210 member B	486.077976865707	-0.396382379267724	0.000396551569886315
ENSG00000137563	8836	GGH	gamma-glutamyl hydrolase	1134.47189331951	-0.305058240340238	0.000396551569886315
ENSG00000197157	27044	SND1	staphylococcal nuclease and tudor domain containing 1	2586.11833186142	0.261295107889839	0.000400997629363163
ENSG00000091136	3912	LAMB1	laminin subunit beta 1	4865.31559284154	0.217751484671155	0.000409478873460552
ENSG00000102317	5935	RBM3	RNA binding motif (RNP1, RRM) protein 3	1248.3756257878	-0.294693465609775	0.000422159255797702
ENSG00000138944	85352	KIAA1644	KIAA1644	2227.95097875851	0.22144571432594	0.000433177899396176
ENSG00000070756	26986	PABPC1	poly(A) binding protein cytoplasmic 1	6065.24265246445	-0.165507105286327	0.000439634543331237
ENSG00000177084	5426	POLE	DNA polymerase epsilon, catalytic subunit	778.96523508886	0.48481442006125	0.000446464128334669
ENSG00000005810	23077	MYCBP2	MYC binding protein 2, E3 ubiquitin protein ligase	509.426798200037	0.386980489904513	0.000449166856082632
ENSG00000089280	2521	FUS	FUS RNA binding protein	3051.84150276742	0.267440479069759	0.000454241006764654
ENSG00000171604	51523	CXXC5	CXXC finger protein 5	873.651640725404	-0.298737012070711	0.000454241006764654
ENSG00000106052	8887	TAX1BP1	Tax1 binding protein 1	2220.80076484418	-0.228512796017941	0.000464975201659283
ENSG00000100644	3091	HIF1A	hypoxia inducible factor 1 alpha subunit	3095.76406003577	-0.231095789975952	0.000467182863385392
ENSG00000162601	114803	MYSM1	Myb like, SWIRM and MPN domains 1	618.802085587962	0.502375750536574	0.000471952811403402
ENSG00000111669	7167	TPI1	triosephosphate isomerase 1	5483.7257831352	-0.187042485423397	0.000480125916185874
ENSG00000151892	2674	GFRA1	GDNF family receptor alpha 1	1144.12534240552	0.278872589818212	0.000495710067099191
ENSG00000161638	3678	ITGA5	integrin subunit alpha 5	1336.15868181849	0.250943744664238	0.000510247157035861
ENSG00000164220	2151	F2RL2	coagulation factor II thrombin receptor like 2	483.789031700754	0.373134632292545	0.000520672914365047
ENSG00000166341	8642	DCHS1	dachsous cadherin-related 1	297.235434371369	0.507850032929901	0.000549755935356869
ENSG00000122026	6144	RPL21	ribosomal protein L21	1050.28098088717	-0.305424762770783	0.000558010468846143
ENSG00000134121	10752	CHL1	cell adhesion molecule L1 like	864.100023746006	0.349592228701752	0.000558010468846143
ENSG00000112473	7922	SLC39A7	solute carrier family 39 member 7	1235.23481533712	0.260595349415037	0.000562548882210941
ENSG00000175592	8061	FOSL1	FOS like 1, AP-1 transcription factor subunit	1400.47425558417	0.264804185128939	0.000563106884025441
ENSG00000101096	4773	NFATC2	nuclear factor of activated T-cells 2	5702.7933648909	0.187906610123561	0.00056613920202556
ENSG00000090857	55066	PDPR	pyruvate dehydrogenase phosphatase regulatory subunit	519.051221474517	0.372016861123978	0.000585361686486928
ENSG00000151012	23657	SLC7A11	solute carrier family 7 member 11	845.692601549935	0.332700159757852	0.000590276562277589
ENSG00000055609	58508	KMT2C	lysine methyltransferase 2C	734.660808280498	0.3780949305836	0.000597553731972723
ENSG00000060237	65125	WNK1	WNK lysine deficient protein kinase 1	1603.02996236433	0.240793632337154	0.000657823236071741
ENSG00000082497	56256	SERTAD4	SERTA domain containing 4	930.370340260291	0.301098216320537	0.000657823236071741
ENSG00000109686	152503	SH3D19	SH3 domain containing 19	1285.67755820188	0.249925423715847	0.000657823236071741
ENSG00000186480	3638	INSIG1	insulin induced gene 1	1514.19932394763	-0.253134786082117	0.000676702583841935
ENSG00000198563	7919	DDX39B	DExD-box helicase 39B	366.641488470244	0.563187990430101	0.000711471477151555
ENSG00000113161	3156	HMGCR	3-hydroxy-3-methylglutaryl-CoA reductase	3689.64152112041	-0.184548273503034	0.000714480247293393
ENSG00000142676	6135	RPL11	ribosomal protein L11	3686.74509992418	-0.22708886579969	0.00073091318103476
ENSG00000165389	171546	SPTSSA	serine palmitoyltransferase small subunit A	406.953356111913	-0.451402860209668	0.00073091318103476
ENSG00000122966	11113	CIT	citron rho-interacting serine/threonine kinase	1303.6342188255	0.286889699537836	0.000764567299808834
ENSG00000136156	9445	ITM2B	integral membrane protein 2B	1796.28785936553	-0.271788346492341	0.00077502767103794
ENSG00000122545	989	2007-09-01	septin 7	3464.63768916205	-0.231812026339752	0.000776190364340644
ENSG00000161513	2232	FDXR	ferredoxin reductase	138.865783771216	-0.653901786767861	0.000785421771238735
ENSG00000008988	6224	RPS20	ribosomal protein S20	1863.5263702334	-0.239402496338285	0.000805750454543611
ENSG00000163682	6133	RPL9	ribosomal protein L9	1588.81988320704	-0.253217263887287	0.000808794513965085
ENSG00000117713	8289	ARID1A	AT-rich interaction domain 1A	811.057642191928	0.312661076367511	0.000810405713911685
ENSG00000084234	334	APLP2	amyloid beta precursor like protein 2	4882.47713867479	-0.174260585394843	0.000812858651838005
ENSG00000163453	3490	IGFBP7	insulin like growth factor binding protein 7	590.286839104756	-0.328157510452593	0.00089804202948856
ENSG00000134291	79022	TMEM106C	transmembrane protein 106C	1844.79707434488	-0.242504695656377	0.000911120898043824
ENSG00000188859	149297	FAM78B	family with sequence similarity 78 member B	1132.4099774694	0.278814958664477	0.00098204175182522
ENSG00000106211	3315	HSPB1	heat shock protein family B (small) member 1	1382.40880515056	-0.256566767864773	0.00104050204941767
ENSG00000170889	6203	RPS9	ribosomal protein S9	2007.59493973585	-0.22850889790967	0.00106176996472594
ENSG00000054654	23224	SYNE2	spectrin repeat containing nuclear envelope protein 2	847.368945618829	0.398542284867294	0.00106242922433788
ENSG00000181026	64782	AEN	apoptosis enhancing nuclease	367.054129250862	-0.415509899373733	0.00106242922433788
ENSG00000125691	9349	RPL23	ribosomal protein L23	2425.37655301348	-0.217628288772461	0.0011323581368331
ENSG00000110651	975	CD81	CD81 molecule	1260.15327820133	-0.245701622901243	0.00115875756869408
ENSG00000112902	9037	SEMA5A	semaphorin 5A	297.667728099224	0.535168072851591	0.00121690531969022
ENSG00000116580	54856	GON4L	gon-4 like	407.1354775141	0.430652211917827	0.00121690531969022
ENSG00000119013	4709	NDUFB3	NADH:ubiquinone oxidoreductase subunit B3	297.227032087124	-0.442483791787497	0.00121911959508529
ENSG00000198625	4194	MDM4	MDM4, p53 regulator	426.478420765241	0.453010691735414	0.00121911959508529
ENSG00000137804	51203	NUSAP1	nucleolar and spindle associated protein 1	2083.21619573206	-0.218210316528387	0.00122640016239672
ENSG00000157456	9133	CCNB2	cyclin B2	716.708634335456	-0.299128373028132	0.00123411960216542
ENSG00000105894	5764	PTN	pleiotrophin	2051.22723755195	-0.2390770046074	0.00123797989304388
ENSG00000114735	51409	HEMK1	HemK methyltransferase family member 1	165.049404474008	0.645450622143934	0.00125970258055935
ENSG00000120708	7045	TGFBI	transforming growth factor beta induced	2241.0245487206	-0.21163394618846	0.00126015128842812
ENSG00000143013	8543	LMO4	LIM domain only 4	627.340692507141	-0.323728903798955	0.00126015128842812
ENSG00000197461	5154	PDGFA	platelet derived growth factor subunit A	975.052625508305	0.278164354942021	0.00130792887802799
ENSG00000090615	2802	GOLGA3	golgin A3	594.294150808265	0.351489758773284	0.00131292450310112
ENSG00000117523	23215	PRRC2C	proline rich coiled-coil 2C	2797.96881441265	0.280373186213451	0.00131292450310112
ENSG00000197136	399909	PCNX3	pecanex homolog 3 (Drosophila)	1030.2800485202	0.299290619438837	0.00131292450310112
ENSG00000001461	57185	NIPAL3	NIPA like domain containing 3	979.52301585812	-0.27523385158623	0.00133793697064146
ENSG00000100393	2033	EP300	E1A binding protein p300	741.702702389329	0.333089298337044	0.00135683309969305
ENSG00000138119	26509	MYOF	myoferlin	1788.51342435002	0.227512181847794	0.00135683309969305
ENSG00000160007	2909	ARHGAP35	Rho GTPase activating protein 35	1714.19680093711	0.223937061222005	0.00138415108098599
ENSG00000100003	23541	SEC14L2	SEC14 like lipid binding 2	505.242629083994	-0.358862345602943	0.00139182249553836
ENSG00000013573	1663	DDX11	DEAD/H-box helicase 11	288.874550219855	0.526588588170926	0.00143428436846594
ENSG00000075568	23505	TMEM131	transmembrane protein 131	1033.04917798366	0.257081880643383	0.00144172817114713
ENSG00000028528	6642	SNX1	sorting nexin 1	2209.40422613995	-0.251648698081938	0.0014524702034727
ENSG00000020577	23034	SAMD4A	sterile alpha motif domain containing 4A	474.003344037296	0.383886934761958	0.00147444669337781
ENSG00000075240	23151	GRAMD4	GRAM domain containing 4	366.004564073265	-0.41031253261615	0.00147463719054474
ENSG00000143742	6726	SRP9	signal recognition particle 9	1420.37751178184	-0.349255431053614	0.0015035553854258
ENSG00000170855	51499	TRIAP1	TP53 regulated inhibitor of apoptosis 1	216.439079232091	-0.501428141725656	0.0015035553854258
ENSG00000178445	2731	GLDC	glycine decarboxylase	288.253928660515	0.445553166241357	0.0015035553854258
ENSG00000159335	5763	PTMS	parathymosin	1542.08805448032	-0.249658737574454	0.0015065949824762
ENSG00000031081	57514	ARHGAP31	Rho GTPase activating protein 31	762.791919296773	0.301403102200682	0.00157097675969393
ENSG00000112984	10112	KIF20A	kinesin family member 20A	1654.26021898713	-0.233165123248451	0.00157890511823247
ENSG00000184226	5101	PCDH9	protocadherin 9	526.347444545045	0.3464195329081	0.00170859123620491
ENSG00000134250	4853	NOTCH2	notch 2	1886.55097986537	0.228630438892761	0.00178426383255771
ENSG00000081154	57092	PCNP	PEST proteolytic signal containing nuclear protein	1090.57204987016	-0.272634311733797	0.0017970896086911
ENSG00000168488	11273	ATXN2L	ataxin 2 like	1093.33284160333	0.283677300625832	0.00182589696844182
ENSG00000104936	1760	DMPK	dystrophia myotonica protein kinase	172.89419323811	0.713111732412273	0.00182944630822174
ENSG00000143947	6233	RPS27A	ribosomal protein S27a	2587.30283419363	-0.239802494065052	0.00182944630822174
ENSG00000184677	9923	ZBTB40	zinc finger and BTB domain containing 40	357.928099339844	0.462493996413212	0.00182944630822174
ENSG00000188157	375790	AGRN	agrin	1008.72276387848	-0.275914446803751	0.00182944630822174
ENSG00000127603	23499	MACF1	microtubule-actin crosslinking factor 1	2002.55890860229	0.300078660321389	0.00182947307277806
ENSG00000175602	11007	CCDC85B	coiled-coil domain containing 85B	724.933122236799	0.303212113119447	0.00182947307277806
ENSG00000089157	6175	RPLP0	ribosomal protein lateral stalk subunit P0	4904.45994202442	-0.225755253150518	0.00183036909216877
ENSG00000152104	5784	PTPN14	protein tyrosine phosphatase, non-receptor type 14	1101.56078416767	-0.278622093096899	0.00183036909216877
ENSG00000129566	7011	TEP1	telomerase associated protein 1	305.534045734565	0.478273822887812	0.00184006487745641
ENSG00000196367	8295	TRRAP	transformation/transcription domain associated protein	1054.53693919508	0.314025253264637	0.00185151304035532
ENSG00000110696	10944	C11orf58	chromosome 11 open reading frame 58	1012.77977417509	-0.291254660145848	0.00186832056297017
ENSG00000165169	6990	DYNLT3	dynein light chain Tctex-type 3	330.679874732067	-0.46617471641174	0.00189814539428686
ENSG00000137154	6194	RPS6	ribosomal protein S6	5091.92647741285	-0.194182640503927	0.0019023031702712
ENSG00000169871	81844	TRIM56	tripartite motif containing 56	570.260989774317	0.356102746846969	0.00191951216899268
ENSG00000170921	26115	TANC2	tetratricopeptide repeat, ankyrin repeat and coiled-coil containing 2	1680.10427004393	0.281165031412612	0.00196509343630081
ENSG00000137818	6176	RPLP1	ribosomal protein lateral stalk subunit P1	4617.28791756675	-0.231966102434471	0.00197986143698261
ENSG00000105379	2109	ETFB	electron transfer flavoprotein beta subunit	390.892700281721	0.401143274812911	0.00200401848922185
ENSG00000156508	1915	EEF1A1	eukaryotic translation elongation factor 1 alpha 1	15023.8081354011	-0.173770882782358	0.0020063777761439
ENSG00000159216	861	RUNX1	runt related transcription factor 1	577.097434186237	0.347321343213682	0.00200886084584673
ENSG00000143321	3068	HDGF	heparin binding growth factor	2447.97447858584	-0.236516532278994	0.00206684223326786
ENSG00000115677	3069	HDLBP	high density lipoprotein binding protein	6314.87441505906	0.179861466944388	0.00208254162716631
ENSG00000137285	347733	TUBB2B	tubulin beta 2B class IIb	480.41503958061	-0.35087470547252	0.00208880580116075
ENSG00000143933	805	CALM2	calmodulin 2	3596.69095802193	-0.253702453253147	0.00208880580116075
ENSG00000213463	55333	SYNJ2BP	synaptojanin 2 binding protein	397.668340901679	-0.364900293897973	0.00208880580116075
ENSG00000185565	4045	LSAMP	limbic system-associated membrane protein	759.969501683913	0.285784629405246	0.00213305430584173
ENSG00000171246	4884	NPTX1	neuronal pentraxin 1	193.528458763465	0.552325203987569	0.00213778839701952
ENSG00000141367	1213	CLTC	clathrin heavy chain	7357.11142005246	0.163739090725498	0.0021483561567785
ENSG00000100422	64781	CERK	ceramide kinase	921.39241981158	-0.271753059379276	0.00227843678452784
ENSG00000072571	3161	HMMR	hyaluronan mediated motility receptor	464.041140979644	-0.382395866743417	0.00230231220535497
ENSG00000118058	4297	KMT2A	lysine methyltransferase 2A	540.94143954058	0.378708743449695	0.00235338944129453
ENSG00000182272	338707	B4GALNT4	beta-1,4-N-acetyl-galactosaminyltransferase 4	336.183132415085	0.413982888187612	0.00238905461315722
ENSG00000154493	118611	C10orf90	chromosome 10 open reading frame 90	305.832590247748	0.487538598473585	0.00243484087497857
ENSG00000064607	10147	SUGP2	SURP and G-patch domain containing 2	716.276110978377	0.408203332784572	0.00251040257351816
ENSG00000110092	595	CCND1	cyclin D1	1639.50029673268	-0.234637808487572	0.00251040257351816
ENSG00000119865	25927	CNRIP1	cannabinoid receptor interacting protein 1	279.054512612882	-0.423207060533824	0.00251040257351816
ENSG00000140526	11057	ABHD2	abhydrolase domain containing 2	4979.05854162863	0.15262478339446	0.00261708712598964
ENSG00000133318	10313	RTN3	reticulon 3	1564.06855997451	-0.219630355988928	0.00262939453695403
ENSG00000138385	6741	SSB	Sjogren syndrome antigen B	968.697360269738	-0.263805068956166	0.00262939453695403
ENSG00000197756	6168	RPL37A	ribosomal protein L37a	3518.61012354756	-0.222819885082336	0.00262939453695403
ENSG00000151131	121053	C12orf45	chromosome 12 open reading frame 45	86.6672906140371	-0.773642622363442	0.00272159334418173
ENSG00000107957	9644	SH3PXD2A	SH3 and PX domains 2A	1754.99564630385	0.255035469110677	0.00272577499352936
ENSG00000163466	10109	ARPC2	actin related protein 2/3 complex subunit 2	2228.08018115476	-0.228236248471095	0.00278489539216347
ENSG00000140859	3801	KIFC3	kinesin family member C3	947.482344259567	0.259393529639023	0.00282097094795899
ENSG00000162783	51278	IER5	immediate early response 5	430.495546463082	-0.374516981895904	0.00282097094795899
ENSG00000127054	54973	INTS11	integrator complex subunit 11	403.663062780115	0.402135281965392	0.00293376770598911
ENSG00000198837	9909	DENND4B	DENN domain containing 4B	553.023946202511	0.35878312600195	0.00293376770598911
ENSG00000011021	1185	CLCN6	chloride voltage-gated channel 6	154.484443780028	0.616519923656674	0.0029608868942801
ENSG00000169567	3094	HINT1	histidine triad nucleotide binding protein 1	2084.75222049131	-0.221497607921127	0.00302515234149156
ENSG00000114554	5361	PLXNA1	plexin A1	432.741255227271	0.342871315170945	0.00303914573932269
ENSG00000106333	5118	PCOLCE	procollagen C-endopeptidase enhancer	1051.4890134712	0.276773223927023	0.00306338135869496
ENSG00000166275	119032	BORCS7	BLOC-1 related complex subunit 7	100.961506617914	-0.702291121543116	0.00308365727531286
ENSG00000170312	983	CDK1	cyclin dependent kinase 1	1413.09403790486	-0.275592705982341	0.00308365727531286
ENSG00000072274	7037	TFRC	transferrin receptor	2707.93110834764	-0.203711443560601	0.00308521728421306
ENSG00000110427	25758	KIAA1549L	KIAA1549 like	919.392419289315	0.255021491246384	0.00308952845903396
ENSG00000060138	8531	YBX3	Y-box binding protein 3	321.738118567947	-0.39941392534337	0.00309039978038502
ENSG00000084774	790	CAD	carbamoyl-phosphate synthetase 2, aspartate transcarbamylase, and dihydroorotase	1009.11782941032	0.319971027895085	0.00311649894056493
ENSG00000081479	4036	LRP2	LDL receptor related protein 2	127.045313644827	0.670597548754095	0.00314881787786239
ENSG00000117450	5052	PRDX1	peroxiredoxin 1	1468.49535008813	-0.241392631560529	0.00314881787786239
ENSG00000149273	6188	RPS3	ribosomal protein S3	5678.89463611623	-0.218939774857869	0.0031815528263876
ENSG00000133639	694	BTG1	BTG anti-proliferation factor 1	380.723650717694	-0.428295517292263	0.00321609552852137
ENSG00000173705	26032	SUSD5	sushi domain containing 5	537.330434356354	-0.31748370040711	0.00322876011057487
ENSG00000170471	57148	RALGAPB	Ral GTPase activating protein non-catalytic beta subunit	1005.56937334437	0.273522672973977	0.00328728254908622
ENSG00000131711	4131	MAP1B	microtubule associated protein 1B	2510.66972296215	0.188980739793271	0.00329185494250652
ENSG00000080845	22839	DLGAP4	DLG associated protein 4	1055.90531617388	0.270818403212473	0.00331556612739
ENSG00000168028	3921	RPSA	ribosomal protein SA	3688.9289428699	-0.236107698230954	0.00332317419506805
ENSG00000183963	6525	SMTN	smoothelin	1323.46939601249	0.299254897333198	0.00335090100975041
ENSG00000101938	91851	CHRDL1	chordin like 1	900.675402969054	0.262791691956588	0.00340401736520872
ENSG00000148303	6130	RPL7A	ribosomal protein L7a	3873.09904135567	-0.172225949132765	0.00342430600835407
ENSG00000091986	151887	CCDC80	coiled-coil domain containing 80	340.998796582157	-0.431455625208761	0.00347207165452869
ENSG00000130816	1786	DNMT1	DNA methyltransferase 1	2399.01942362534	0.215459292672945	0.00347905723467457
ENSG00000163945	57654	UVSSA	UV stimulated scaffold protein A	248.773333470768	0.550149962364163	0.00347905723467457
ENSG00000197355	91373	UAP1L1	UDP-N-acetylglucosamine pyrophosphorylase 1 like 1	603.191961131833	0.313215608998719	0.00347905723467457
ENSG00000176340	1351	COX8A	cytochrome c oxidase subunit 8A	992.819703431865	-0.280976801075654	0.00354184121022571
ENSG00000149547	9538	EI24	EI24, autophagy associated transmembrane protein	1140.21081539532	-0.237367998489771	0.00357818861449198
ENSG00000116133	1718	DHCR24	24-dehydrocholesterol reductase	3923.67617417324	-0.201378485095006	0.00371622473965388
ENSG00000102804	8848	TSC22D1	TSC22 domain family member 1	1696.05502034159	-0.219934128977574	0.00371939665581485
ENSG00000143878	388	RHOB	ras homolog family member B	487.483213417521	-0.351293118022986	0.00378596797238576
ENSG00000141002	22980	TCF25	transcription factor 25	796.386615750379	0.31351427272317	0.00384902172125193
ENSG00000074054	23332	CLASP1	cytoplasmic linker associated protein 1	1273.92332202126	0.239731142199846	0.003919686714697
ENSG00000168453	55806	HR	HR, lysine demethylase and nuclear receptor corepressor	1129.53758949445	-0.225803733926887	0.00392058892833749
ENSG00000171163	55657	ZNF692	zinc finger protein 692	185.515857821348	0.614977663677512	0.00393745053187213
ENSG00000064042	22998	LIMCH1	LIM and calponin homology domains 1	273.487213366198	-0.444239654315232	0.00395827684502505
ENSG00000173706	57493	HEG1	heart development protein with EGF like domains 1	445.28189200355	0.33135543531699	0.00395828010844923
ENSG00000147862	4781	NFIB	nuclear factor I B	831.939650598807	0.264140239634172	0.00413191385244924
ENSG00000103249	1186	CLCN7	chloride voltage-gated channel 7	444.435986756683	0.360989214493668	0.00413756741245193
ENSG00000170315	7314	UBB	ubiquitin B	1271.02781671994	-0.236230965130359	0.00414567135179941
ENSG00000080824	3320	HSP90AA1	heat shock protein 90 alpha family class A member 1	11131.2227506694	-0.188469355586548	0.00416419852974716
ENSG00000119408	10783	NEK6	NIMA related kinase 6	349.488078135463	0.376711942488742	0.00416419852974716
ENSG00000150893	341640	FREM2	FRAS1 related extracellular matrix protein 2	2291.44693350746	0.25323284933752	0.00416419852974716
ENSG00000157106	23049	SMG1	SMG1, nonsense mediated mRNA decay associated PI3K related kinase	1098.1159908154	0.336091561157779	0.00427515294756783
ENSG00000090975	57605	PITPNM2	phosphatidylinositol transfer protein membrane associated 2	469.023429863344	0.436516217531292	0.0042907687097466
ENSG00000126883	8021	NUP214	nucleoporin 214	568.732894531458	0.318284902323304	0.00435700812247902
ENSG00000162298	84447	SYVN1	synoviolin 1	432.373646979582	0.352754315612544	0.00438711735557465
ENSG00000196683	54543	TOMM7	translocase of outer mitochondrial membrane 7	1348.44602908928	-0.213332562704117	0.00438711735557465
ENSG00000155366	389	RHOC	ras homolog family member C	1455.26562286195	-0.234158009554163	0.00438920854065628
ENSG00000196072	282991	BLOC1S2	biogenesis of lysosomal organelles complex 1 subunit 2	211.10503464902	-0.455143511159582	0.00452005329200611
ENSG00000168002	5436	POLR2G	RNA polymerase II subunit G	509.042496528585	-0.323590927966848	0.0045542783368573
ENSG00000234616	8629	JRK	Jrk helix-turn-helix protein	253.977283721296	0.478530939848228	0.0045542783368573
ENSG00000113615	10802	SEC24A	SEC24 homolog A, COPII coat complex component	714.647086339792	0.306969357123547	0.00457185196184557
ENSG00000076706	4162	MCAM	melanoma cell adhesion molecule	2560.21322238272	-0.17561173260738	0.00457203963463607
ENSG00000171241	79801	SHCBP1	SHC binding and spindle associated 1	1227.07576652627	-0.247053886900802	0.00459701554088295
ENSG00000173517	79834	PEAK1	pseudopodium enriched atypical kinase 1	489.229417884605	0.330095934464678	0.00462012338905254
ENSG00000116679	10625	IVNS1ABP	influenza virus NS1A binding protein	1374.72697816308	0.225906990307764	0.0046328775432453
ENSG00000089009	6128	RPL6	ribosomal protein L6	1598.56939832957	-0.19851933204067	0.00475661658315839
ENSG00000132274	10346	TRIM22	tripartite motif containing 22	115.400421117348	-0.711649036535349	0.00475882889417018
ENSG00000240184	5098	PCDHGC3	protocadherin gamma subfamily C, 3	3120.88131526195	0.199609289270206	0.00479211581987744
ENSG00000102901	80152	CENPT	centromere protein T	193.054755574745	0.513595318721758	0.00481210459832705
ENSG00000134333	3939	LDHA	lactate dehydrogenase A	15035.798881825	-0.162872070508367	0.00490534879211676
ENSG00000230989	3281	HSBP1	heat shock factor binding protein 1	1818.69630907211	-0.220989251383974	0.00491356784634673
ENSG00000205542	7114	TMSB4X	thymosin beta 4, X-linked	383.109028965195	-0.399828855532173	0.00494698757668818
ENSG00000138326	6229	RPS24	ribosomal protein S24	1727.07878743882	-0.188471689602641	0.00496123283913453
ENSG00000176142	55254	TMEM39A	transmembrane protein 39A	240.076769202991	0.428022097500549	0.00496123283913453
ENSG00000100154	23331	TTC28	tetratricopeptide repeat domain 28	195.646581408323	0.543394285701275	0.00503429229832541
ENSG00000107984	22943	DKK1	dickkopf WNT signaling pathway inhibitor 1	99.071063203275	-0.769318404992842	0.00504303015850603
ENSG00000144791	8994	LIMD1	LIM domains containing 1	420.571383426515	0.357238073030538	0.00507158385477587
ENSG00000164434	2173	FABP7	fatty acid binding protein 7	844.032217397149	-0.255882174336975	0.00517084520759294
ENSG00000155849	9844	ELMO1	engulfment and cell motility 1	518.278655579444	0.312448891799795	0.00531989231938032
ENSG00000180891	404093	CUEDC1	CUE domain containing 1	922.530053475063	0.248248847280622	0.00535508951098791
ENSG00000131149	23199	GSE1	Gse1 coiled-coil protein	582.22412203151	0.298881246666701	0.00537436652469802
ENSG00000166200	9318	COPS2	COP9 signalosome subunit 2	1090.95333209924	-0.253990200433959	0.00537436652469802
ENSG00000179750	9582	APOBEC3B	apolipoprotein B mRNA editing enzyme catalytic subunit 3B	413.116510230367	-0.335670663718315	0.00540108307745856
ENSG00000155304	6782	HSPA13	heat shock protein family A (Hsp70) member 13	969.625537614342	-0.27050197866632	0.00545552162550976
ENSG00000160299	5116	PCNT	pericentrin	640.354936045715	0.383678561465663	0.00545552162550976
ENSG00000103335	9780	PIEZO1	piezo type mechanosensitive ion channel component 1	1261.84741495622	0.232952219476055	0.0054772105074475
ENSG00000118680	103910	MYL12B	myosin light chain 12B	1014.00828430489	-0.246728610268135	0.0054772105074475
ENSG00000151779	51594	NBAS	neuroblastoma amplified sequence	606.281558731538	0.296510227532373	0.00552263055193688
ENSG00000139718	23067	SETD1B	SET domain containing 1B	186.55095251861	0.495126660125956	0.00556672552992505
ENSG00000168003	6520	SLC3A2	solute carrier family 3 member 2	3593.01619979337	0.160959292637481	0.00559098575849818
ENSG00000155090	7071	KLF10	Kruppel like factor 10	421.669619613665	-0.341811617124602	0.00569778826799476
ENSG00000135540	57224	NHSL1	NHS like 1	462.512604248229	0.351671848500468	0.00570375912707772
ENSG00000137497	4926	NUMA1	nuclear mitotic apparatus protein 1	1002.38768984451	0.291647666404109	0.00570375912707772
ENSG00000234420	100129482	ZNF37BP	zinc finger protein 37B, pseudogene	224.967008456592	0.537999229104084	0.00570375912707772
ENSG00000173068	54796	BNC2	basonuclin 2	247.157234994036	0.4238626956042	0.00576356957343504
ENSG00000108468	10951	CBX1	chromobox 1	1294.70817484586	-0.239573073468656	0.00593159866930737
ENSG00000142599	473	RERE	arginine-glutamic acid dipeptide repeats	554.688855079541	0.307684289405438	0.0059512549357545
ENSG00000172534	3054	HCFC1	host cell factor C1	1120.04839510099	0.266268149452804	0.00599396771496914
ENSG00000133112	7178	TPT1	tumor protein, translationally-controlled 1	3281.94604833824	-0.236501578332825	0.00610665289517498
ENSG00000131724	3597	IL13RA1	interleukin 13 receptor subunit alpha 1	564.66928735339	-0.288264005447831	0.00611171914623771
ENSG00000172349	3603	IL16	interleukin 16	389.36019221917	0.390424551904222	0.00611171914623771
ENSG00000172757	1072	CFL1	cofilin 1	7464.81940197936	-0.151623791129891	0.0061888597063849
ENSG00000106344	55131	RBM28	RNA binding motif protein 28	617.620600247069	0.281078054197649	0.0061910423182143
ENSG00000116717	1647	GADD45A	growth arrest and DNA damage inducible alpha	357.026505110579	-0.359314198699277	0.0061910423182143
ENSG00000123983	2181	ACSL3	acyl-CoA synthetase long-chain family member 3	4580.0667860975	-0.153199750365398	0.00625002875568112
ENSG00000141526	9123	SLC16A3	solute carrier family 16 member 3	424.188258521067	-0.345301345117967	0.00629802730157593
ENSG00000113328	900	CCNG1	cyclin G1	1197.64331204295	-0.266765720036749	0.00642852343398231
ENSG00000154380	55740	ENAH	enabled homolog (Drosophila)	2891.00710334983	-0.196918898223273	0.00642852343398231
ENSG00000178252	11180	WDR6	WD repeat domain 6	977.087930807265	0.290619825358439	0.00642852343398231
ENSG00000072364	27125	AFF4	AF4/FMR2 family member 4	1891.52086496607	0.18806381222485	0.00660556558296699
ENSG00000164211	134429	STARD4	StAR related lipid transfer domain containing 4	1000.49426623157	-0.276329527059319	0.00662846454069372
ENSG00000104368	5327	PLAT	plasminogen activator, tissue type	2551.47894538835	-0.187686123149444	0.00677980605823136
ENSG00000088325	22974	TPX2	TPX2, microtubule nucleation factor	3355.38675160941	-0.156107798850088	0.00678103697440725
ENSG00000166797	84191	FAM96A	family with sequence similarity 96 member A	496.888880477287	-0.367925110077691	0.00678103697440725
ENSG00000171634	2186	BPTF	bromodomain PHD finger transcription factor	933.229687033167	0.258237045529184	0.00678103697440725
ENSG00000169116	25849	PARM1	prostate androgen-regulated mucin-like protein 1	93.6910702042261	-0.670517147639947	0.00687798386408647
ENSG00000197958	6136	RPL12	ribosomal protein L12	2106.13365060285	-0.223515969899534	0.00687798386408647
ENSG00000164346	10412	NSA2	NSA2, ribosome biogenesis homolog	534.691692892742	-0.363601518407696	0.00691179385881431
ENSG00000146830	64599	GIGYF1	GRB10 interacting GYF protein 1	498.866012373294	0.450247542462676	0.00713218406828587
ENSG00000103657	8925	HERC1	HECT and RLD domain containing E3 ubiquitin protein ligase family member 1	495.608201770156	0.331742807031166	0.00713371246645151
ENSG00000025772	10953	TOMM34	translocase of outer mitochondrial membrane 34	688.203217427096	-0.280937084593395	0.00731464274851799
ENSG00000074416	11343	MGLL	monoglyceride lipase	596.542401100814	-0.280334639575863	0.00731464274851799
ENSG00000174306	23051	ZHX3	zinc fingers and homeoboxes 3	727.691550102946	0.289374230706544	0.00731464274851799
ENSG00000224877	284184	NDUFAF8	NADH:ubiquinone oxidoreductase complex assembly factor 8	411.275286969201	-0.349079864439948	0.00731464274851799
ENSG00000168724	134218	DNAJC21	DnaJ heat shock protein family (Hsp40) member C21	529.816204430692	-0.290991225815874	0.00737642195230642
ENSG00000168137	55209	SETD5	SET domain containing 5	963.790829039408	0.292590654575868	0.00761189119111948
ENSG00000010295	25900	IFFO1	intermediate filament family orphan 1	326.67312257353	0.414013012633559	0.00764469165628312
ENSG00000189079	196528	ARID2	AT-rich interaction domain 2	459.212163775634	0.320583503508443	0.00766229960246124
ENSG00000135709	9764	KIAA0513	KIAA0513	601.771819467859	0.291138050716742	0.00772106194954866
ENSG00000067445	7216	TRO	trophinin	271.260405917456	0.422435934797154	0.0080337730960517
ENSG00000112312	51053	GMNN	geminin, DNA replication inhibitor	277.763966417487	-0.406610674112879	0.00806478053245996
ENSG00000148341	56904	SH3GLB2	SH3 domain containing GRB2 like, endophilin B2	230.482094256805	0.418931624192921	0.00808618153882206
ENSG00000204604	90333	ZNF468	zinc finger protein 468	168.309033915982	-0.511539494204756	0.00814605027219551
ENSG00000154639	1525	CXADR	coxsackie virus and adenovirus receptor	95.7223461187754	-0.67633305915106	0.00819404753980382
ENSG00000138080	11117	EMILIN1	elastin microfibril interfacer 1	1936.79801541684	0.223520667940897	0.00841895957241344
ENSG00000115306	6711	SPTBN1	spectrin beta, non-erythrocytic 1	3748.17277309904	0.204747283764054	0.00845809522745601
ENSG00000161996	197335	WDR90	WD repeat domain 90	311.404508690906	0.466785930288695	0.00850002754046786
ENSG00000124181	5335	PLCG1	phospholipase C gamma 1	1502.00548950505	0.255358549215983	0.00851103262288622
ENSG00000102908	10725	NFAT5	nuclear factor of activated T-cells 5	411.647242663293	0.382777794433263	0.00851258562400387
ENSG00000172809	6169	RPL38	ribosomal protein L38	1146.21683858717	-0.243703573832749	0.00851258562400387
ENSG00000114857	4820	NKTR	natural killer cell triggering receptor	584.791526055661	0.389075588765371	0.00857639718019087
ENSG00000089685	332	BIRC5	baculoviral IAP repeat containing 5	2249.5701597333	-0.238115001839413	0.00861608083876801
ENSG00000164733	1508	CTSB	cathepsin B	2599.79227895327	-0.176380624565517	0.00864764908746248
ENSG00000143061	3321	IGSF3	immunoglobulin superfamily member 3	1453.41451934146	-0.19439412029684	0.0086609884135186
ENSG00000183495	57634	EP400	E1A binding protein p400	445.154492499598	0.391796227933043	0.00909158821632429
ENSG00000167526	6137	RPL13	ribosomal protein L13	3494.56456689712	-0.193212706972435	0.00929617668820642
ENSG00000174197	23269	MGA	MGA, MAX dimerization protein	280.910558344634	0.386386693927651	0.0093373815800877
ENSG00000099250	8829	NRP1	neuropilin 1	687.2344484238	-0.262047092431213	0.00940172897044232
ENSG00000135250	6733	SRPK2	SRSF protein kinase 2	814.135657910189	-0.237997787190179	0.00940608480501371
ENSG00000170677	9306	SOCS6	suppressor of cytokine signaling 6	462.466659988056	-0.316655143443188	0.00940608480501371
ENSG00000168078	55872	PBK	PDZ binding kinase	1174.5265937841	-0.264000205062546	0.00944647323579507
ENSG00000198026	63925	ZNF335	zinc finger protein 335	371.647018469726	0.392698081312278	0.00946460740116685
ENSG00000166295	119504	ANAPC16	anaphase promoting complex subunit 16	379.293932459859	-0.353883292611991	0.0096377418819177
ENSG00000164587	6208	RPS14	ribosomal protein S14	2096.68350351304	-0.219022600099556	0.00964085640978645
ENSG00000005884	3675	ITGA3	integrin subunit alpha 3	8568.61042013244	-0.14056147473174	0.00974149673319469
ENSG00000111799	1303	COL12A1	collagen type XII alpha 1 chain	2817.13815159339	0.171414088777203	0.00993664326143608
ENSG00000147669	5440	POLR2K	RNA polymerase II subunit K	480.220471606813	-0.315442949655936	0.00996093057444994
ENSG00000204394	7407	VARS	valyl-tRNA synthetase	1232.16294264938	0.208705948192523	0.0100169584514734
ENSG00000142552	57333	RCN3	reticulocalbin 3	292.853722541973	0.374108394207032	0.0100763260162703
ENSG00000065613	9748	SLK	STE20 like kinase	873.266343844032	-0.242011351097469	0.0102810786733177
ENSG00000183397	100128569	C19orf71	chromosome 19 open reading frame 71	376.889270533781	0.382592593837144	0.0103103130421223
ENSG00000064932	22904	SBNO2	strawberry notch homolog 2	532.590941751022	0.292315452652697	0.010322540976048
ENSG00000116209	9528	TMEM59	transmembrane protein 59	1514.72036735321	-0.233613080870006	0.0104334193860532
ENSG00000149499	256364	EML3	echinoderm microtubule associated protein like 3	497.855712811107	0.307017886772571	0.0104334193860532
ENSG00000170955	112464	CAVIN3	caveolae associated protein 3	1279.15516677387	-0.203727093282931	0.0104593675388284
ENSG00000241973	5297	PI4KA	phosphatidylinositol 4-kinase alpha	1140.29857429387	0.236516691559555	0.0104601259785927
ENSG00000038002	175	AGA	aspartylglucosaminidase	522.552850587821	-0.294924633955799	0.0104921002954547
ENSG00000074047	2736	GLI2	GLI family zinc finger 2	231.640611594472	0.424968709789133	0.0104921002954547
ENSG00000143776	8476	CDC42BPA	CDC42 binding protein kinase alpha	1222.08489161492	0.210673013430809	0.0104921002954547
ENSG00000175040	9435	CHST2	carbohydrate sulfotransferase 2	442.69718914023	0.329197040124648	0.0104921002954547
ENSG00000148396	9919	SEC16A	SEC16 homolog A, endoplasmic reticulum export factor	782.706954243721	0.263085282211418	0.0105098366769056
ENSG00000135945	51455	REV1	REV1, DNA directed polymerase	371.884784117305	0.338330185578772	0.0105482122717201
ENSG00000165912	29763	PACSIN3	protein kinase C and casein kinase substrate in neurons 3	414.535378433353	-0.329034753319397	0.0105482122717201
ENSG00000126001	11190	CEP250	centrosomal protein 250	777.021890548312	0.288496132749011	0.0106199631110374
ENSG00000182287	8905	AP1S2	adaptor related protein complex 1 sigma 2 subunit	965.538363280143	-0.327506595009688	0.0106555373371847
ENSG00000174437	488	ATP2A2	ATPase sarcoplasmic/endoplasmic reticulum Ca2+ transporting 2	3751.04220299886	0.146775671062229	0.0107359148617303
ENSG00000168268	64943	NT5DC2	5'-nucleotidase domain containing 2	1311.12984975931	-0.193364455347183	0.0108861203538695
ENSG00000156515	3098	HK1	hexokinase 1	1740.40595329382	0.212213748066538	0.0110821408283786
ENSG00000106278	5803	PTPRZ1	protein tyrosine phosphatase, receptor type Z1	3095.46415855236	0.155388998763951	0.0110962105266531
ENSG00000167291	125058	TBC1D16	TBC1 domain family member 16	1801.40888692077	0.18968952006377	0.0111650820231955
ENSG00000166803	9768	PCLAF	PCNA clamp associated factor	337.506946337265	-0.423087152796386	0.0112367039091915
ENSG00000115561	51652	CHMP3	charged multivesicular body protein 3	649.076606496798	-0.292000759105803	0.0112510162558696
ENSG00000113384	64083	GOLPH3	golgi phosphoprotein 3	717.472255295167	-0.277191631399657	0.011299578596996
ENSG00000223959	172	AFG3L1P	AFG3 like matrix AAA peptidase subunit 1, pseudogene	243.2433358621	0.550320822188529	0.0113559879300189
ENSG00000235162	387882	C12orf75	chromosome 12 open reading frame 75	646.580617128944	-0.391307214084659	0.0115213547670752
ENSG00000100697	23405	DICER1	dicer 1, ribonuclease III	384.906384179838	0.383414174667287	0.0115556468346147
ENSG00000101199	55738	ARFGAP1	ADP ribosylation factor GTPase activating protein 1	851.103973779886	0.341855937348472	0.0115714106707252
ENSG00000116489	829	CAPZA1	capping actin protein of muscle Z-line alpha subunit 1	2029.65768099062	-0.214929815005596	0.0117379099253319
ENSG00000142892	10026	PIGK	phosphatidylinositol glycan anchor biosynthesis class K	846.615730784225	-0.266322781913253	0.0117878897430325
ENSG00000100242	25777	SUN2	Sad1 and UNC84 domain containing 2	984.760714244049	-0.218416086726597	0.011807032468219
ENSG00000173418	51126	NAA20	N(alpha)-acetyltransferase 20, NatB catalytic subunit	735.844038666866	-0.258005417211495	0.0118790523928826
ENSG00000099194	6319	SCD	stearoyl-CoA desaturase	5309.17279725172	-0.189291481942159	0.0121744441504446
ENSG00000106537	27075	TSPAN13	tetraspanin 13	1998.78817330592	-0.176082091213833	0.012220320031408
ENSG00000198380	2673	GFPT1	glutamine--fructose-6-phosphate transaminase 1	619.327437572665	0.255604242034563	0.0122420763297395
ENSG00000133026	4628	MYH10	myosin heavy chain 10	2884.19484596559	0.201143086579138	0.0122437125467264
ENSG00000182774	6218	RPS17	ribosomal protein S17	2421.64111902889	-0.196172484512933	0.0123089421269224
ENSG00000142794	84224	NBPF3	NBPF member 3	130.404567436465	0.532006083660325	0.0124698353732817
ENSG00000196313	9883	POM121	POM121 transmembrane nucleoporin	345.986252787173	0.377192738882183	0.0125687926069547
ENSG00000117862	51060	TXNDC12	thioredoxin domain containing 12	847.948701339043	-0.253944759585113	0.0127448995953887
ENSG00000171067	53838	C11orf24	chromosome 11 open reading frame 24	1456.08169889155	0.196504405813378	0.0128168480482887
ENSG00000176915	23141	ANKLE2	ankyrin repeat and LEM domain containing 2	526.251481877071	0.286378651889224	0.0129625501328641
ENSG00000131236	10487	CAP1	adenylate cyclase associated protein 1	1383.48117372285	-0.188745582228708	0.0132120782035401
ENSG00000129103	25870	SUMF2	sulfatase modifying factor 2	2102.97545543299	-0.178166392552617	0.0133640818599385
ENSG00000164032	3015	H2AFZ	H2A histone family member Z	3726.19622192708	-0.176992426339508	0.0133890646298924
ENSG00000182704	25987	TSKU	tsukushi, small leucine rich proteoglycan	455.389546051612	-0.29669317477836	0.0133890646298924
ENSG00000240583	358	AQP1	aquaporin 1 (Colton blood group)	386.770569968738	0.364627383875931	0.0133890646298924
ENSG00000134531	2012	EMP1	epithelial membrane protein 1	1357.1439308107	-0.219785359201716	0.013608447824998
ENSG00000066117	6602	SMARCD1	SWI/SNF related, matrix associated, actin dependent regulator of chromatin, subfamily d, member 1	1346.98239397482	0.195247892447708	0.0138019148830244
ENSG00000134057	891	CCNB1	cyclin B1	2096.61599956173	-0.181969549259228	0.0138187645252501
ENSG00000143995	4211	MEIS1	Meis homeobox 1	208.530297651496	0.419746949230927	0.0138187645252501
ENSG00000063438	57491	AHRR	aryl-hydrocarbon receptor repressor	620.652385845982	0.270304373667185	0.0138246866264008
ENSG00000142627	1969	EPHA2	EPH receptor A2	271.935466792399	-0.367212658748575	0.0138246866264008
ENSG00000164904	501	ALDH7A1	aldehyde dehydrogenase 7 family member A1	1240.90422486445	-0.192924021953315	0.0138246866264008
ENSG00000198373	11060	WWP2	WW domain containing E3 ubiquitin protein ligase 2	1164.27044647236	0.292770592708099	0.0138246866264008
ENSG00000101439	1471	CST3	cystatin C	898.120800774212	-0.220362723010495	0.0138478237687409
ENSG00000122406	6125	RPL5	ribosomal protein L5	2589.13788286477	-0.196755255437964	0.013855532420321
ENSG00000112245	7803	PTP4A1	protein tyrosine phosphatase type IVA, member 1	1450.17614140451	-0.251991768189302	0.0139215381809146
ENSG00000111961	23328	SASH1	SAM and SH3 domain containing 1	694.726762131282	0.265119165504283	0.0139683423167579
ENSG00000173960	165324	UBXN2A	UBX domain protein 2A	548.556052536671	-0.264947336923089	0.0139744723548159
ENSG00000129048	51554	ACKR4	atypical chemokine receptor 4	121.223417846541	0.556753048308301	0.0140271363345774
ENSG00000206503	3105	HLA-A	major histocompatibility complex, class I, A	2962.25419486587	-0.15713852532718	0.014247823507141
ENSG00000184752	55967	NDUFA12	NADH:ubiquinone oxidoreductase subunit A12	259.204359744767	-0.383862387341684	0.0144376544018904
ENSG00000183530	253143	PRR14L	proline rich 14 like	485.958877699763	0.313428584974714	0.0146333268612154
ENSG00000109881	91057	CCDC34	coiled-coil domain containing 34	269.584507959138	-0.396676324063509	0.0147024485218399
ENSG00000177706	56975	FAM20C	FAM20C, golgi associated secretory pathway kinase	6077.77878904652	0.133440449296988	0.014745002696483
ENSG00000242802	9907	AP5Z1	adaptor related protein complex 5 zeta 1 subunit	311.309477011891	0.354814394432922	0.0148190909886638
ENSG00000140836	463	ZFHX3	zinc finger homeobox 3	180.786645975547	0.463075426395266	0.0150632574993104
ENSG00000104695	5516	PPP2CB	protein phosphatase 2 catalytic subunit beta	506.209494284792	-0.29895153669134	0.0150688578684425
ENSG00000073756	5743	PTGS2	prostaglandin-endoperoxide synthase 2	276.115179476134	0.406414974970745	0.0155201335262059
ENSG00000090889	24137	KIF4A	kinesin family member 4A	847.080446979487	-0.220487294147033	0.0155201335262059
ENSG00000112306	6206	RPS12	ribosomal protein S12	1635.63996133367	-0.195353563085623	0.0155201335262059
ENSG00000149115	85456	TNKS1BP1	tankyrase 1 binding protein 1	595.583280666837	0.268337341601145	0.0155201335262059
ENSG00000103365	23062	GGA2	golgi associated, gamma adaptin ear containing, ARF binding protein 2	603.046487364397	0.258870820398905	0.0156447154634567
ENSG00000130770	93974	ATPIF1	ATPase inhibitory factor 1	375.481508467854	-0.316845781331633	0.015644771704864
ENSG00000172380	55970	GNG12	G protein subunit gamma 12	6628.97009023008	0.186409656242459	0.015644771704864
ENSG00000247556	NA	NA	NA	838.557237309539	-0.221491012162996	0.015644771704864
ENSG00000107104	23189	KANK1	KN motif and ankyrin repeat domains 1	690.423193314462	0.251595424267507	0.0156919196731132
ENSG00000147471	11212	PLPBP	pyridoxal phosphate binding protein	231.616874839949	-0.393842798881363	0.0157615760273243
ENSG00000086598	10959	TMED2	transmembrane p24 trafficking protein 2	1731.61702676697	-0.222809893041991	0.0158725663814431
ENSG00000134243	6272	SORT1	sortilin 1	899.117929271468	-0.222256287049221	0.0159947515644651
ENSG00000136379	58489	ABHD17C	abhydrolase domain containing 17C	535.829219724887	-0.280427920909077	0.0160426185940196
ENSG00000173276	49854	ZBTB21	zinc finger and BTB domain containing 21	411.096663703397	0.322865287028508	0.0160426185940196
ENSG00000177954	6232	RPS27	ribosomal protein S27	1754.35624980262	-0.195829770179119	0.0160426185940196
ENSG00000160949	4796	TONSL	tonsoku like, DNA repair protein	406.506027063805	0.353293796311878	0.0162294318053667
ENSG00000095739	25805	BAMBI	BMP and activin membrane bound inhibitor	2148.98395346431	0.162082479520777	0.0164317268105
ENSG00000114867	1981	EIF4G1	eukaryotic translation initiation factor 4 gamma 1	3333.21317240578	0.150338440687258	0.0164317268105
ENSG00000261711	NA	NA	NA	89.9500537585737	0.647185889061699	0.0164317268105
ENSG00000196419	2547	XRCC6	X-ray repair cross complementing 6	3603.80658709509	-0.151700576528035	0.0165141290154813
ENSG00000007384	64285	RHBDF1	rhomboid 5 homolog 1	209.800388566107	0.500135936189042	0.0165911057161339
ENSG00000110429	26273	FBXO3	F-box protein 3	298.251164621196	-0.353670334142426	0.0166249917997615
ENSG00000156467	7381	UQCRB	ubiquinol-cytochrome c reductase binding protein	668.396528426979	-0.277783453372659	0.0168044859382777
ENSG00000185591	6667	SP1	Sp1 transcription factor	1077.51972467386	0.227399362354883	0.016822550737124
ENSG00000110700	6207	RPS13	ribosomal protein S13	1297.09137057561	-0.193045038941411	0.0170808016184267
ENSG00000160072	83858	ATAD3B	ATPase family, AAA domain containing 3B	226.863745420326	0.423908897694833	0.0170808016184267
ENSG00000102316	10916	MAGED2	MAGE family member D2	2370.55847529583	0.170866771903195	0.0171583175197805
ENSG00000140988	6187	RPS2	ribosomal protein S2	5753.01053436668	-0.174431849726404	0.017268539863582
ENSG00000158014	7780	SLC30A2	solute carrier family 30 member 2	115.395785493507	0.564901834940344	0.017300865391921
ENSG00000128791	57045	TWSG1	twisted gastrulation BMP signaling modulator 1	695.075341760589	-0.279941891841014	0.0173597588719034
ENSG00000197283	8831	SYNGAP1	synaptic Ras GTPase activating protein 1	219.279452913315	0.49406344873354	0.0174214566043128
ENSG00000085063	966	CD59	CD59 molecule (CD59 blood group)	6669.3165654675	-0.132909462834729	0.0175161161742303
ENSG00000065809	83641	FAM107B	family with sequence similarity 107 member B	181.650233418106	-0.43694495061705	0.0176838497251375
ENSG00000120318	64411	ARAP3	ArfGAP with RhoGAP domain, ankyrin repeat and PH domain 3	734.415019196893	0.264636466305884	0.0177292509289783
ENSG00000155886	25769	SLC24A2	solute carrier family 24 member 2	92.5245459672105	0.5929559922952	0.0177477595863491
ENSG00000182670	7267	TTC3	tetratricopeptide repeat domain 3	1439.32297377058	0.177373354854307	0.0178544549793734
ENSG00000077235	2975	GTF3C1	general transcription factor IIIC subunit 1	1168.59749579438	0.213056402000258	0.0179232956992329
ENSG00000105771	56006	SMG9	SMG9, nonsense mediated mRNA decay factor	420.741562001944	0.338214577637256	0.0179232956992329
ENSG00000170340	10678	B3GNT2	UDP-GlcNAc:betaGal beta-1,3-N-acetylglucosaminyltransferase 2	188.364764032585	-0.437463472019338	0.0179659075829467
ENSG00000253738	100506365	OTUD6B-AS1	OTUD6B antisense RNA 1 (head to head)	249.911899872179	-0.418498263463151	0.0181707482839514
ENSG00000135336	23595	ORC3	origin recognition complex subunit 3	281.807748126702	-0.350398972358011	0.018738112959798
ENSG00000166963	4130	MAP1A	microtubule associated protein 1A	665.010728247464	0.263718084424661	0.018932746205076
ENSG00000169504	25932	CLIC4	chloride intracellular channel 4	3860.68910327843	-0.22975730939003	0.0189585709647145
ENSG00000100526	1033	CDKN3	cyclin dependent kinase inhibitor 3	371.286495856163	-0.323816934816924	0.0190725292255718
ENSG00000141577	22994	CEP131	centrosomal protein 131	457.886564765804	0.278334340044198	0.0191201211908622
ENSG00000149925	226	ALDOA	aldolase, fructose-bisphosphate A	9698.65818336674	-0.149198566540099	0.0191756352699346
ENSG00000159140	6651	SON	SON DNA binding protein	2681.82707437594	0.214192326635647	0.0191756352699346
ENSG00000110693	55553	SOX6	SRY-box 6	305.671680986371	0.343745509208308	0.0192803646902768
ENSG00000116918	7257	TSNAX	translin associated factor X	619.108016310153	-0.328963710635123	0.0192803646902768
ENSG00000111728	6489	ST8SIA1	ST8 alpha-N-acetyl-neuraminide alpha-2,8-sialyltransferase 1	182.091655703612	0.439843715488004	0.019516390937524
ENSG00000111843	51522	TMEM14C	transmembrane protein 14C	662.96569050517	-0.251200201895898	0.019516390937524
ENSG00000196943	161424	NOP9	NOP9 nucleolar protein	195.255217470825	0.432745538522174	0.0195240564402927
ENSG00000136240	11014	KDELR2	KDEL endoplasmic reticulum protein retention receptor 2	3145.30222606039	0.185705404606096	0.0195378111217394
ENSG00000152377	6695	SPOCK1	SPARC/osteonectin, cwcv and kazal like domains proteoglycan 1	1792.85142313982	-0.166705635233228	0.0196123541227314
ENSG00000111676	1822	ATN1	atrophin 1	1193.37189827566	0.222343895984852	0.0196447537217331
ENSG00000145741	689	BTF3	basic transcription factor 3	2185.87298965542	-0.187714910409435	0.0196447537217331
ENSG00000105397	7297	TYK2	tyrosine kinase 2	449.171266448041	0.384524420034893	0.0196812180703314
ENSG00000101187	28231	SLCO4A1	solute carrier organic anion transporter family member 4A1	259.837645112044	0.36187807894409	0.0197209402007436
ENSG00000173406	1600	DAB1	DAB1, reelin adaptor protein	107.510954677952	0.570492926469364	0.0197209402007436
ENSG00000177700	5441	POLR2L	RNA polymerase II subunit L	519.323405520365	-0.274934066880665	0.0197907779681696
ENSG00000153317	50807	ASAP1	ArfGAP with SH3 domain, ankyrin repeat and PH domain 1	951.849422982332	0.224229621678698	0.0199086371181051
ENSG00000123374	1017	CDK2	cyclin dependent kinase 2	683.924174922967	-0.238511010701935	0.0201616695182344
ENSG00000134363	10468	FST	follistatin	990.502183193641	-0.215667790365378	0.0202521745342656
ENSG00000115183	85461	TANC1	tetratricopeptide repeat, ankyrin repeat and coiled-coil containing 1	1864.7395813105	0.168922833038586	0.0202782399350814
ENSG00000075223	10512	SEMA3C	semaphorin 3C	2640.84069928973	-0.183036618250578	0.0203822991840573
ENSG00000046653	2824	GPM6B	glycoprotein M6B	312.816007135854	-0.357486082422118	0.0205799414303841
ENSG00000156030	91748	ELMSAN1	ELM2 and Myb/SANT domain containing 1	355.843350604649	0.381138158142278	0.0205799414303841
ENSG00000104419	10397	NDRG1	N-myc downstream regulated 1	781.87304964154	0.260948427208219	0.0207203638840746
ENSG00000115318	84695	LOXL3	lysyl oxidase like 3	2756.19464274406	0.150180191080048	0.0208688438455367
ENSG00000127481	23352	UBR4	ubiquitin protein ligase E3 component n-recognin 4	1237.67377314035	0.516813134202324	0.0208688438455367
ENSG00000011422	5329	PLAUR	plasminogen activator, urokinase receptor	354.048432388978	-0.324424877804673	0.0209095397673822
ENSG00000164080	23132	RAD54L2	RAD54-like 2 (S. cerevisiae)	491.904246067136	0.290181625027303	0.020955900732038
ENSG00000113558	6500	SKP1	S-phase kinase associated protein 1	1643.59854410801	-0.178108611530272	0.0210168544981806
ENSG00000129515	58533	SNX6	sorting nexin 6	321.705440532153	-0.33784053615559	0.0210168544981806
ENSG00000061938	10188	TNK2	tyrosine kinase non receptor 2	238.465423965545	0.400704473518323	0.0211357553433554
ENSG00000132694	9826	ARHGEF11	Rho guanine nucleotide exchange factor 11	1465.50430720991	0.189465929886567	0.0212706555872325
ENSG00000174231	10594	PRPF8	pre-mRNA processing factor 8	2833.12076088782	0.17973369443682	0.0214531010181501
ENSG00000087510	7022	TFAP2C	transcription factor AP-2 gamma	2493.16122329758	0.145338498077388	0.0217581230991892
ENSG00000135476	9700	ESPL1	extra spindle pole bodies like 1, separase	886.898347399349	0.27971466802389	0.021954992734738
ENSG00000171566	5356	PLRG1	pleiotropic regulator 1	729.945564729346	-0.226779009630829	0.021954992734738
ENSG00000107186	8777	MPDZ	multiple PDZ domain crumbs cell polarity complex component	598.442767556017	0.249669627085686	0.0219657654203045
ENSG00000122218	1314	COPA	coatomer protein complex subunit alpha	3088.0131333923	0.154233808350774	0.0220548922490644
ENSG00000198561	1500	CTNND1	catenin delta 1	1170.14201532497	0.194381256312043	0.0221203534834309
ENSG00000086065	51510	CHMP5	charged multivesicular body protein 5	572.948791929039	-0.289936911037491	0.0222295217072005
ENSG00000109099	5376	PMP22	peripheral myelin protein 22	2133.27623456249	0.180506900121712	0.0222295217072005
ENSG00000138074	8884	SLC5A6	solute carrier family 5 member 6	423.201091935041	0.295960248496462	0.0222295217072005
ENSG00000163029	79677	SMC6	structural maintenance of chromosomes 6	608.663971537654	-0.254651611199429	0.0222295217072005
ENSG00000067704	55699	IARS2	isoleucyl-tRNA synthetase 2, mitochondrial	1803.06781420946	-0.177220882303159	0.0222341192812021
ENSG00000143751	163859	SDE2	SDE2 telomere maintenance homolog	357.822407419079	-0.308148608116746	0.0222755942825177
ENSG00000223496	118460	EXOSC6	exosome component 6	410.019507440947	-0.295506583645107	0.0222755942825177
ENSG00000055044	51602	NOP58	NOP58 ribonucleoprotein	871.718862232941	-0.219397755683451	0.0223199854081041
ENSG00000146648	1956	EGFR	epidermal growth factor receptor	353.740456296432	0.314371065788711	0.0225426833663846
ENSG00000157193	7804	LRP8	LDL receptor related protein 8	1457.03856463461	0.179911070911737	0.0225426833663846
ENSG00000278709	105416157	NKILA	NF-kappaB interacting lncRNA	95.4351415616122	-0.60078902949872	0.0226418192955943
ENSG00000170776	11214	AKAP13	A-kinase anchoring protein 13	292.925889844315	0.34790997874711	0.0226918025626549
ENSG00000154265	23461	ABCA5	ATP binding cassette subfamily A member 5	268.218726284395	0.369722096075701	0.022824624809837
ENSG00000131584	116983	ACAP3	ArfGAP with coiled-coil, ankyrin repeat and PH domains 3	423.034686389874	0.328723557760685	0.0229440990768203
ENSG00000197694	6709	SPTAN1	spectrin alpha, non-erythrocytic 1	2297.29188747362	0.22713411286859	0.0230844174098283
ENSG00000166710	567	B2M	beta-2-microglobulin	5552.80205079191	-0.17457952025445	0.0230997361263169
ENSG00000117899	23184	MESDC2	mesoderm development candidate 2	875.985166865204	-0.210716225514468	0.0233783232308422
ENSG00000144810	1295	COL8A1	collagen type VIII alpha 1 chain	4209.44466310126	0.148108071145785	0.0234952298832145
ENSG00000105373	29997	NOP53	NOP53 ribosome biogenesis factor	520.509501560548	-0.255068559000697	0.0234959673207691
ENSG00000164176	10085	EDIL3	EGF like repeats and discoidin domains 3	1581.30325890587	-0.213870126625749	0.0237686193094282
ENSG00000164332	134510	UBLCP1	ubiquitin like domain containing CTD phosphatase 1	396.629769051456	-0.331407812106874	0.0239566910042906
ENSG00000164916	221937	FOXK1	forkhead box K1	415.811455422808	0.297419673687938	0.0239566910042906
ENSG00000115944	9167	COX7A2L	cytochrome c oxidase subunit 7A2 like	610.176594038118	-0.253712837730636	0.0239598074878329
ENSG00000008869	54497	HEATR5B	HEAT repeat containing 5B	285.575514420568	0.41529402063312	0.0241676471803138
ENSG00000132635	64773	PCED1A	PC-esterase domain containing 1A	480.707499997779	0.349510742602607	0.0241676471803138
ENSG00000243317	647087	C7orf73	chromosome 7 open reading frame 73	791.044206719806	-0.228338052574713	0.0242986094781265
ENSG00000125107	23019	CNOT1	CCR4-NOT transcription complex subunit 1	1846.57085275689	0.163727618332463	0.0247615502396034
ENSG00000159840	7791	ZYX	zyxin	1973.0959801286	-0.168152981448434	0.0247768487118539
ENSG00000161057	5701	PSMC2	proteasome 26S subunit, ATPase 2	1823.54473971253	-0.179932165654857	0.0247768487118539
ENSG00000170004	1107	CHD3	chromodomain helicase DNA binding protein 3	1409.71266131948	0.203924128457328	0.0247768487118539
ENSG00000100129	51386	EIF3L	eukaryotic translation initiation factor 3 subunit L	1419.24625380577	-0.183456551000966	0.0248702970476909
ENSG00000166441	6157	RPL27A	ribosomal protein L27a	1615.89437975025	-0.201442665785105	0.0250786825580909
ENSG00000108946	5573	PRKAR1A	protein kinase cAMP-dependent type I regulatory subunit alpha	3984.75349581133	-0.188258181689362	0.0252120031235373
ENSG00000116128	607	BCL9	B-cell CLL/lymphoma 9	1081.23828958663	0.206067418475919	0.0254429453302978
ENSG00000102144	5230	PGK1	phosphoglycerate kinase 1	3633.77577772685	-0.148689842568574	0.0256479583175214
ENSG00000124172	514	ATP5E	ATP synthase, H+ transporting, mitochondrial F1 complex, epsilon subunit	1452.3375992877	-0.17229449411557	0.0257795786780376
ENSG00000164405	27089	UQCRQ	ubiquinol-cytochrome c reductase complex III subunit VII	756.606330755654	-0.2417740615319	0.0257795786780376
ENSG00000242808	347689	SOX2-OT	SOX2 overlapping transcript	98.9391063941087	-0.578514066251929	0.0257795786780376
ENSG00000145730	5066	PAM	peptidylglycine alpha-amidating monooxygenase	2909.27252305678	-0.13641626933182	0.0261362556453936
ENSG00000151835	26278	SACS	sacsin molecular chaperone	964.448654478016	0.213348705375416	0.0261362556453936
ENSG00000198053	140885	SIRPA	signal regulatory protein alpha	898.917837490145	0.208225191013725	0.0261362556453936
ENSG00000154640	10950	BTG3	BTG anti-proliferation factor 3	592.292025922659	-0.293944405278203	0.0261760405327723
ENSG00000242265	23089	PEG10	paternally expressed 10	2507.57009951603	0.163760572680258	0.0261760405327723
ENSG00000101191	11083	DIDO1	death inducer-obliterator 1	932.442608812216	0.243653437380252	0.0263192659406725
ENSG00000167900	7083	TK1	thymidine kinase 1	2017.51774266588	-0.173409552233436	0.0264956037328391
ENSG00000134982	324	APC	APC, WNT signaling pathway regulator	884.787784257883	0.223919422529121	0.0267265053942398
ENSG00000215041	84461	NEURL4	neuralized E3 ubiquitin protein ligase 4	168.030344458368	0.520959651050472	0.026935873487775
ENSG00000184381	8398	PLA2G6	phospholipase A2 group VI	90.2039853075913	0.642631583090356	0.0269473779395675
ENSG00000004777	115703	ARHGAP33	Rho GTPase activating protein 33	128.958790551139	0.621311516063978	0.0270810121465402
ENSG00000087086	2512	FTL	ferritin light chain	6162.69022336904	0.183691508916105	0.027142380118356
ENSG00000188486	3014	H2AFX	H2A histone family member X	789.071517930637	-0.213907565488018	0.027142380118356
ENSG00000235423	NA	NA	NA	107.186138191097	0.530554335756761	0.027142380118356
ENSG00000114956	1716	DGUOK	deoxyguanosine kinase	344.536114411225	-0.330781883745549	0.0271475523845593
ENSG00000157873	8764	TNFRSF14	TNF receptor superfamily member 14	125.224665712186	0.515539832104384	0.0271475523845593
ENSG00000203875	387066	SNHG5	small nucleolar RNA host gene 5	946.297883596851	-0.217521074598156	0.0271475523845593
ENSG00000198755	4736	RPL10A	ribosomal protein L10a	1833.52559083237	-0.159954431432067	0.0272050476442601
ENSG00000124562	6631	SNRPC	small nuclear ribonucleoprotein polypeptide C	462.952598150202	-0.265665445655188	0.0273388657706237
ENSG00000091592	22861	NLRP1	NLR family pyrin domain containing 1	104.125393063235	0.577856299931979	0.0274632530703457
ENSG00000137076	7094	TLN1	talin 1	3626.72917338573	0.159430322380678	0.0276416270839561
ENSG00000137504	58487	CREBZF	CREB/ATF bZIP transcription factor	273.816561462245	0.469529411885636	0.0280133294545626
ENSG00000103168	9013	TAF1C	TATA-box binding protein associated factor, RNA polymerase I subunit C	419.582890052863	0.370915493131265	0.0282343275008395
ENSG00000112695	1347	COX7A2	cytochrome c oxidase subunit 7A2	934.341517931534	-0.257720150632539	0.0282343275008395
ENSG00000171858	6227	RPS21	ribosomal protein S21	1517.48878250736	-0.196990902142729	0.0282343275008395
ENSG00000010256	7384	UQCRC1	ubiquinol-cytochrome c reductase core protein I	1303.20062815216	-0.208138702421318	0.0289589065970431
ENSG00000003249	79007	DBNDD1	dysbindin domain containing 1	492.704777196081	-0.271384251457543	0.029130961390049
ENSG00000095951	3096	HIVEP1	human immunodeficiency virus type I enhancer binding protein 1	125.480044174974	0.488877758259687	0.029130961390049
ENSG00000162402	23358	USP24	ubiquitin specific peptidase 24	642.437829694419	0.244873044283157	0.0293962206497698
ENSG00000069849	483	ATP1B3	ATPase Na+/K+ transporting subunit beta 3	1984.92453080777	-0.17177736427195	0.029815599363501
ENSG00000089057	9962	SLC23A2	solute carrier family 23 member 2	1925.30500223717	0.15900394545707	0.029815599363501
ENSG00000188612	6613	SUMO2	small ubiquitin-like modifier 2	762.262520120789	-0.253766537371961	0.0299968301072064
ENSG00000117399	991	CDC20	cell division cycle 20	1189.63427013937	-0.197664635791677	0.0300735882359882
ENSG00000076641	55824	PAG1	phosphoprotein membrane anchor with glycosphingolipid microdomains 1	549.076165370546	0.25101397648473	0.0300969002444452
ENSG00000164109	4085	MAD2L1	mitotic arrest deficient 2 like 1	835.978147173245	-0.258282037848556	0.0301908278325895
ENSG00000188186	389541	LAMTOR4	late endosomal/lysosomal adaptor, MAPK and MTOR activator 4	452.170812972016	-0.281567976161172	0.0304331688894605
ENSG00000169992	57555	NLGN2	neuroligin 2	464.17253424619	0.292619499098899	0.0305350481875086
ENSG00000175550	10589	DRAP1	DR1 associated protein 1	1024.67977472905	-0.205342221826028	0.0305350481875086
ENSG00000160285	4047	LSS	lanosterol synthase	768.849501424705	0.295432095191798	0.0305614936225924
ENSG00000124207	1434	CSE1L	chromosome segregation 1 like	3049.69149151152	-0.16101431327972	0.0306093762233305
ENSG00000185324	8558	CDK10	cyclin dependent kinase 10	411.578063648612	0.383778611292912	0.0306093762233305
ENSG00000101474	57136	APMAP	adipocyte plasma membrane associated protein	2657.00095558262	-0.146295403474344	0.0307683685137521
ENSG00000106355	23658	LSM5	LSM5 homolog, U6 small nuclear RNA and mRNA degradation associated	679.126834210938	-0.267214838834325	0.0307683685137521
ENSG00000107438	9124	PDLIM1	PDZ and LIM domain 1	131.323997693155	-0.51004966509308	0.0309458958147909
ENSG00000048707	55187	VPS13D	vacuolar protein sorting 13 homolog D	415.607789007815	0.302298701226025	0.0313014773590583
ENSG00000171456	171023	ASXL1	additional sex combs like 1, transcriptional regulator	1099.60352006271	0.260390966450533	0.0313014773590583
ENSG00000135837	9857	CEP350	centrosomal protein 350	820.848806751055	0.237988257875323	0.031335931326773
ENSG00000165959	79789	CLMN	calmin	538.898851998706	0.25678218832964	0.0313841652772691
ENSG00000110958	10728	PTGES3	prostaglandin E synthase 3	3196.58171089946	-0.197341293767705	0.0317902878723093
ENSG00000228716	1719	DHFR	dihydrofolate reductase	406.040613420834	-0.303361731228572	0.0317995879356499
ENSG00000204580	780	DDR1	discoidin domain receptor tyrosine kinase 1	678.486961365768	-0.240133995675907	0.0319768225653442
ENSG00000107282	320	APBA1	amyloid beta precursor protein binding family A member 1	186.791528791866	0.403564854761863	0.0328560796280134
ENSG00000134825	746	TMEM258	transmembrane protein 258	436.076346924074	-0.26882347300641	0.0328560796280134
ENSG00000143545	5872	RAB13	RAB13, member RAS oncogene family	1336.10420072488	-0.20698349915823	0.0328560796280134
ENSG00000153201	5903	RANBP2	RAN binding protein 2	917.425234799941	0.20683789120349	0.032999578179357
ENSG00000272333	9757	KMT2B	lysine methyltransferase 2B	325.604027746952	0.417511461075285	0.0331677163625899
ENSG00000114491	7372	UMPS	uridine monophosphate synthetase	284.552842713288	-0.344003024216759	0.0331764589597173
ENSG00000118515	6446	SGK1	serum/glucocorticoid regulated kinase 1	532.147317460262	0.303393726037296	0.033223002809501
ENSG00000034510	9168	TMSB10	thymosin beta 10	3348.97550706498	-0.155362124414545	0.0333412284381496
ENSG00000147162	8473	OGT	O-linked N-acetylglucosamine (GlcNAc) transferase	589.88827593168	0.560701948975069	0.0333859414956474
ENSG00000182240	25825	BACE2	beta-site APP-cleaving enzyme 2	4541.09768111197	0.132256748488505	0.0334243600357526
ENSG00000176170	8877	SPHK1	sphingosine kinase 1	508.914927131686	-0.266778249967625	0.0334490442129072
ENSG00000144026	84874	ZNF514	zinc finger protein 514	98.7748551083236	0.577327380329801	0.0335324292471958
ENSG00000166260	1353	COX11	COX11, cytochrome c oxidase copper chaperone	614.512417322036	-0.252592752054386	0.0337778378543703
ENSG00000088970	55857	KIZ	kizuna centrosomal protein	136.431348954178	0.562831630324549	0.0339034622235617
ENSG00000139168	85437	ZCRB1	zinc finger CCHC-type and RNA binding motif containing 1	428.463403134878	-0.330190753979585	0.0339034622235617
ENSG00000177383	64110	MAGEF1	MAGE family member F1	446.586771068195	-0.289041182495126	0.0341545178831753
ENSG00000169129	84632	AFAP1L2	actin filament associated protein 1 like 2	1058.53912053544	0.217304018098293	0.0342967510659888
ENSG00000131069	55902	ACSS2	acyl-CoA synthetase short-chain family member 2	802.650282701918	0.223143616925136	0.0343092539762188
ENSG00000173599	5091	PC	pyruvate carboxylase	500.676216062451	0.249322936829832	0.0343626103271172
ENSG00000170832	84669	USP32	ubiquitin specific peptidase 32	486.041490930502	0.257663094130524	0.034589529845865
ENSG00000163479	6746	SSR2	signal sequence receptor subunit 2	2197.11819973744	-0.154001572689535	0.0347164315546114
ENSG00000164961	9897	WASHC5	WASH complex subunit 5	632.746258710353	0.223493698427038	0.0347164315546114
ENSG00000184557	9021	SOCS3	suppressor of cytokine signaling 3	240.064889163322	0.357992544909878	0.0347164315546114
ENSG00000180357	23060	ZNF609	zinc finger protein 609	584.468309899175	0.239218646049065	0.0347165115438318
ENSG00000067955	865	CBFB	core-binding factor beta subunit	1584.59391412274	-0.208816287536275	0.0347464519242488
ENSG00000156504	159090	FAM122B	family with sequence similarity 122B	665.446154888236	-0.238363489793591	0.0348271312985661
ENSG00000080166	1638	DCT	dopachrome tautomerase	88.4242718237588	0.563722643658124	0.034917413581786
ENSG00000198729	81706	PPP1R14C	protein phosphatase 1 regulatory inhibitor subunit 14C	192.312739856201	-0.394818645137625	0.034917413581786
ENSG00000089220	5037	PEBP1	phosphatidylethanolamine binding protein 1	1260.72739544208	-0.195605279336433	0.035099250216182
ENSG00000181610	51649	MRPS23	mitochondrial ribosomal protein S23	522.300981723936	-0.251617802605585	0.0351226539591003
ENSG00000155363	4343	MOV10	Mov10 RISC complex RNA helicase	384.024020263399	0.316032786267325	0.0352935686682678
ENSG00000101182	5688	PSMA7	proteasome subunit alpha 7	2412.76419345083	-0.155986405908235	0.0353025578107137
ENSG00000204386	4758	NEU1	neuraminidase 1	717.529411747934	-0.212776649709259	0.0353319345454436
ENSG00000149782	5331	PLCB3	phospholipase C beta 3	570.211343581468	-0.248719364599396	0.0357439659713802
ENSG00000065526	23013	SPEN	spen family transcriptional repressor	489.133145354908	0.324952882184273	0.0358061001117109
ENSG00000128626	6183	MRPS12	mitochondrial ribosomal protein S12	202.071668762191	-0.388616282316699	0.0358061001117109
ENSG00000133069	9911	TMCC2	transmembrane and coiled-coil domain family 2	192.709428807404	0.392291192884106	0.0358061001117109
ENSG00000138002	26160	IFT172	intraflagellar transport 172	228.960328239135	0.391108674643408	0.0358061001117109
ENSG00000119950	4601	MXI1	MAX interactor 1, dimerization protein	438.204241533899	0.283356274398701	0.0358612685656999
ENSG00000130723	84726	PRRC2B	proline rich coiled-coil 2B	1043.62348411149	0.259446816098064	0.0358612685656999
ENSG00000156802	29028	ATAD2	ATPase family, AAA domain containing 2	1955.35292579496	-0.175726376402138	0.0358612685656999
ENSG00000163625	23001	WDFY3	WD repeat and FYVE domain containing 3	358.896399875465	0.299341862055579	0.0360159038576009
ENSG00000136068	2317	FLNB	filamin B	794.726223189144	-0.247535945858459	0.0361560773745344
ENSG00000197976	8227	AKAP17A	A-kinase anchoring protein 17A	264.09171499533	0.372386937974532	0.0362428524191559
ENSG00000172992	79877	DCAKD	dephospho-CoA kinase domain containing	197.155943923933	-0.377789051915974	0.0362623826703013
ENSG00000169764	7360	UGP2	UDP-glucose pyrophosphorylase 2	1241.71337371185	-0.218468744491824	0.037580828505806
ENSG00000167522	29123	ANKRD11	ankyrin repeat domain 11	1514.19837486956	0.175320399484276	0.0378543560838539
ENSG00000115977	22848	AAK1	AP2 associated kinase 1	620.761079519823	0.226787782959557	0.0379811709799131
ENSG00000006210	6376	CX3CL1	C-X3-C motif chemokine ligand 1	325.96038969871	-0.314324787286449	0.0381674575666002
ENSG00000131941	85415	RHPN2	rhophilin Rho GTPase binding protein 2	144.196804929105	-0.442974443586217	0.0382419047407268
ENSG00000155368	1622	DBI	diazepam binding inhibitor, acyl-CoA binding protein	1387.84662829842	-0.2075730973874	0.0385004583053918
ENSG00000104885	84444	DOT1L	DOT1 like histone lysine methyltransferase	447.234699817031	0.294932761228329	0.0385358621519145
ENSG00000116459	515	ATP5F1	ATP synthase, H+ transporting, mitochondrial Fo complex subunit B1	1312.14478897774	-0.169823135900106	0.0387029009744771
ENSG00000126903	8273	SLC10A3	solute carrier family 10 member 3	224.528546648015	-0.360921522146334	0.0390917384301959
ENSG00000164932	115908	CTHRC1	collagen triple helix repeat containing 1	674.726019919525	-0.253104701937656	0.0391660777195111
ENSG00000196154	6275	S100A4	S100 calcium binding protein A4	216.112816054598	0.379098773569872	0.0391660777195111
ENSG00000134285	51303	FKBP11	FK506 binding protein 11	186.493143399927	0.408200220761692	0.0393140715223478
ENSG00000140391	10099	TSPAN3	tetraspanin 3	1839.50837079509	-0.181316031465897	0.0393140715223478
ENSG00000162496	9249	DHRS3	dehydrogenase/reductase 3	1126.56815883097	0.184735650333598	0.0393140715223478
ENSG00000196704	51321	AMZ2	archaelysin family metallopeptidase 2	721.331557571697	-0.230392389749963	0.0393140715223478
ENSG00000055483	57602	USP36	ubiquitin specific peptidase 36	763.834249615792	0.277092730715776	0.0393224545728917
ENSG00000117519	1266	CNN3	calponin 3	1479.35295863418	-0.19016679780257	0.0397932001257873
ENSG00000105640	6142	RPL18A	ribosomal protein L18a	1085.51662392019	-0.216149710697442	0.0398168692058569
ENSG00000152217	26040	SETBP1	SET binding protein 1	192.137494528632	0.398725415381687	0.0399620231951428
ENSG00000167470	90007	MIDN	midnolin	647.87614863191	0.242731016096028	0.0400667773136427
ENSG00000118257	8828	NRP2	neuropilin 2	3377.22517809617	0.125612444078923	0.0401516523256962
ENSG00000179832	727957	MROH1	maestro heat like repeat family member 1	201.348920688366	0.417080425608058	0.0401516523256962
ENSG00000196739	85301	COL27A1	collagen type XXVII alpha 1 chain	900.292763388354	0.760660749801934	0.0405222229064582
ENSG00000105426	5802	PTPRS	protein tyrosine phosphatase, receptor type S	584.112552237019	0.24328690673642	0.0409492564668203
ENSG00000110395	867	CBL	Cbl proto-oncogene	487.327111753767	0.257873834733069	0.0410027581406795
ENSG00000131966	55860	ACTR10	actin-related protein 10 homolog	379.807258349859	-0.307219002573167	0.0410027581406795
ENSG00000094631	10013	HDAC6	histone deacetylase 6	316.159240367468	0.335362616657264	0.0411022509504937
ENSG00000068654	25885	POLR1A	RNA polymerase I subunit A	730.822492594099	0.219745814319393	0.0413310687082516
ENSG00000197969	23230	VPS13A	vacuolar protein sorting 13 homolog A	554.90502047879	0.291113481030659	0.0413553494224759
ENSG00000182952	10473	HMGN4	high mobility group nucleosomal binding domain 4	235.457016217634	-0.361435595504682	0.0413875928510662
ENSG00000244509	27350	APOBEC3C	apolipoprotein B mRNA editing enzyme catalytic subunit 3C	622.010003849605	-0.221431959313297	0.0418778628276506
ENSG00000169180	23214	XPO6	exportin 6	1082.25462270916	0.193334119283913	0.0419694413836723
ENSG00000178401	79962	DNAJC22	DnaJ heat shock protein family (Hsp40) member C22	283.868681734633	-0.330778844958013	0.0424528079532637
ENSG00000185722	51479	ANKFY1	ankyrin repeat and FYVE domain containing 1	444.919407811738	0.281015132002267	0.0426199973551735
ENSG00000173598	11163	NUDT4	nudix hydrolase 4	274.377722717517	-0.327386848054581	0.0432481069157475
ENSG00000143867	130497	OSR1	odd-skipped related transciption factor 1	113.580963569455	-0.490157744204378	0.0433979974477063
ENSG00000119655	10577	NPC2	NPC intracellular cholesterol transporter 2	455.743572680052	-0.256753733324197	0.043536641129665
ENSG00000140612	23478	SEC11A	SEC11 homolog A, signal peptidase complex subunit	1055.42116010103	-0.21708875867354	0.043536641129665
ENSG00000240342	NA	NA	NA	633.90873271875	-0.269351869387997	0.0437366833364689
ENSG00000172531	5499	PPP1CA	protein phosphatase 1 catalytic subunit alpha	1681.14201875434	-0.171537294668311	0.0440724007853169
ENSG00000237765	285550	FAM200B	family with sequence similarity 200 member B	189.294813750519	-0.379465909027121	0.0440724007853169
ENSG00000119979	404636	FAM45A	family with sequence similarity 45 member A	105.88100694485	-0.518969128996612	0.0441934960693872
ENSG00000117360	9129	PRPF3	pre-mRNA processing factor 3	348.306843113648	0.327067926505467	0.0442144372914674
ENSG00000225733	100505641	FGD5-AS1	FGD5 antisense RNA 1	1998.16154044324	-0.150334305407534	0.0443217176738497
ENSG00000131669	4814	NINJ1	ninjurin 1	170.532894269186	-0.409154280928998	0.0447552788514858
ENSG00000085733	2017	CTTN	cortactin	2985.98437836931	0.18124292348758	0.0449121802481779
ENSG00000063176	56848	SPHK2	sphingosine kinase 2	125.973536605416	0.473357470981449	0.0451113122084923
ENSG00000175785	145270	PRIMA1	proline rich membrane anchor 1	100.821587054058	0.512531808911483	0.0451113122084923
ENSG00000198840	4537	ND3	NADH dehydrogenase, subunit 3 (complex I)	2222.04586319742	-0.204080365768684	0.0451113122084923
ENSG00000251562	378938	MALAT1	metastasis associated lung adenocarcinoma transcript 1 (non-protein coding)	3739.31410452778	0.879977419704201	0.0452267602516019
ENSG00000127804	79066	METTL16	methyltransferase like 16	255.485782551637	0.335357415433773	0.0453404316130337
ENSG00000161016	6132	RPL8	ribosomal protein L8	5186.36588657925	-0.153969338608923	0.045487917166142
ENSG00000183741	23466	CBX6	chromobox 6	1729.44840616048	-0.150015090167226	0.045487917166142
ENSG00000123485	55355	HJURP	Holliday junction recognition protein	1368.96136304055	0.170376255525972	0.045520890837882
ENSG00000184432	9276	COPB2	coatomer protein complex subunit beta 2	1628.96499023273	0.156931557176252	0.0459376164822693
ENSG00000109118	57649	PHF12	PHD finger protein 12	288.127402544691	0.320454717511197	0.0459783930622586
ENSG00000164070	22824	HSPA4L	heat shock protein family A (Hsp70) member 4 like	232.664229540473	-0.343562185792137	0.0459783930622586
ENSG00000169696	79058	ASPSCR1	ASPSCR1, UBX domain containing tether for SLC2A4	305.768813339856	0.306102620995136	0.0460212572237533
ENSG00000125945	80818	ZNF436	zinc finger protein 436	500.612960785549	-0.24548300613159	0.0462775199590968
ENSG00000176485	11145	PLA2G16	phospholipase A2 group XVI	97.9651538287917	-0.51544266319161	0.0466016479726673
ENSG00000156976	1974	EIF4A2	eukaryotic translation initiation factor 4A2	1084.82164811085	0.242775858599982	0.0467503507156026
ENSG00000161203	1173	AP2M1	adaptor related protein complex 2 mu 1 subunit	2193.34431574771	-0.141674972277651	0.0467503507156026
ENSG00000139645	283373	ANKRD52	ankyrin repeat domain 52	1216.83972064167	0.197968689587195	0.0469046328125924
ENSG00000163050	56997	COQ8A	coenzyme Q8A	233.25707888276	-0.376907012644204	0.0469046328125924
ENSG00000154518	518	ATP5G3	ATP synthase, H+ transporting, mitochondrial Fo complex subunit C3 (subunit 9)	1951.25331721841	-0.16202830092168	0.047041894096057
ENSG00000198898	830	CAPZA2	capping actin protein of muscle Z-line alpha subunit 2	1093.22748879003	-0.228295020644784	0.0471262627435469
ENSG00000119048	7320	UBE2B	ubiquitin conjugating enzyme E2 B	452.754922376598	-0.27116792084982	0.0475356132092099
ENSG00000196498	9612	NCOR2	nuclear receptor corepressor 2	981.697220559689	0.230556773437425	0.0477441733683593
ENSG00000132329	10267	RAMP1	receptor activity modifying protein 1	461.450484161755	0.265888837022423	0.0478150373094864
ENSG00000152117	150776	LOC150776	sphingomyelin phosphodiesterase 4, neutral membrane (neutral sphingomyelinase-3) pseudogene	129.147210037833	0.482549713227153	0.0479308235956848
ENSG00000104852	6625	SNRNP70	small nuclear ribonucleoprotein U1 subunit 70	1456.6595736178	0.226393573695924	0.0479627079213869
ENSG00000187109	4673	NAP1L1	nucleosome assembly protein 1 like 1	1694.30022303282	-0.157227119984952	0.0480424065571422
ENSG00000108389	9110	MTMR4	myotubularin related protein 4	795.289401683621	0.211593662916066	0.0481165384963426
ENSG00000122884	5033	P4HA1	prolyl 4-hydroxylase subunit alpha 1	753.295533402705	-0.236592628555487	0.0481165384963426
ENSG00000124702	116138	KLHDC3	kelch domain containing 3	363.312739288122	-0.280151912550041	0.0481165384963426
ENSG00000071082	6160	RPL31	ribosomal protein L31	1558.33747667613	-0.160992084501256	0.0483025919598036
ENSG00000184465	253769	WDR27	WD repeat domain 27	88.1658287427976	0.644271283271412	0.0483025919598036
ENSG00000075420	64778	FNDC3B	fibronectin type III domain containing 3B	917.706317605084	0.186587191424125	0.048351659923836
ENSG00000038427	1462	VCAN	versican	6380.96524747289	0.143439577131674	0.0483546184411895
ENSG00000107130	23413	NCS1	neuronal calcium sensor 1	441.294973469729	-0.251492873773149	0.0483762216056968
ENSG00000137692	84259	DCUN1D5	defective in cullin neddylation 1 domain containing 5	86.1770833269133	-0.55393499342942	0.0483762216056968
ENSG00000154727	2551	GABPA	GA binding protein transcription factor alpha subunit	256.639027125704	-0.345709077473451	0.0483762216056968
ENSG00000128191	54487	DGCR8	DGCR8, microprocessor complex subunit	323.045377510135	0.344607302249282	0.0484082936694069
ENSG00000178573	4094	MAF	MAF bZIP transcription factor	396.154414324536	-0.293431080473524	0.0484082936694069
ENSG00000231500	6222	RPS18	ribosomal protein S18	2967.38169521792	-0.190489453535958	0.0484082936694069
ENSG00000187134	1645	AKR1C1	aldo-keto reductase family 1 member C1	135.311109346006	-0.455476916528148	0.0485178005768493
ENSG00000166949	4088	SMAD3	SMAD family member 3	907.71945835921	0.191473226185552	0.0486418109874543
ENSG00000118596	9194	SLC16A7	solute carrier family 16 member 7	304.753730429333	0.322264515881989	0.0487437466549671
ENSG00000119688	5826	ABCD4	ATP binding cassette subfamily D member 4	153.866013937498	0.431876531397094	0.0487437466549671
ENSG00000235750	9674	KIAA0040	KIAA0040	307.2836019502	-0.301835228796218	0.0487437466549671
ENSG00000163507	57650	KIAA1524	KIAA1524	536.51007560352	-0.232955482538128	0.0490525522366447
ENSG00000182718	302	ANXA2	annexin A2	8548.42691422579	-0.145638716744521	0.0490525522366447
ENSG00000105849	221830	TWISTNB	TWIST neighbor	715.7753139392	-0.206163879078778	0.0495172379870545
ENSG00000168079	286133	SCARA5	scavenger receptor class A member 5	130.144299558321	0.444188029670737	0.0499563391083499

## Sheet: Snb19 - C1 - Table S3
Supplementary Table S3. The list shows the genes that were differentially expressed in THTMP vs Untreated in the cell type analysis using DESeq2
ENSEMBL	ENTREZID	SYMBOL	GENENAME	baseMean	log2FoldChange	padj
ENSG00000134853	5156	PDGFRA	platelet derived growth factor receptor alpha	3612.13	-4.80743	0
ENSG00000146197	222663	SCUBE3	signal peptide, CUB domain and EGF like domain containing 3	2246.57	-6.71626	0
ENSG00000118432	1268	CNR1	cannabinoid receptor 1	882.548	-5.00469	7.87859e-275
ENSG00000137801	7057	THBS1	thrombospondin 1	7872.53	-2.85599	6.36436e-257
ENSG00000171617	8507	ENC1	ectodermal-neural cortex 1	5770.95	-2.8876	5.80253e-247
ENSG00000188042	10123	ARL4C	ADP ribosylation factor like GTPase 4C	2978.65	-2.56476	5.21933e-224
ENSG00000075223	10512	SEMA3C	semaphorin 3C	3690.72	-2.31609	2.71768e-221
ENSG00000011426	54443	ANLN	anillin actin binding protein	4373.2	-2.36734	4.19131e-220
ENSG00000149212	143686	SESN3	sestrin 3	2881.74	-2.64896	3.26622e-210
ENSG00000126787	9787	DLGAP5	DLG associated protein 5	1294.67	-2.70203	3.27142e-209
ENSG00000112276	11149	BVES	blood vessel epicardial substance	1973.44	-2.71604	4.03362e-205
ENSG00000111859	4739	NEDD9	neural precursor cell expressed, developmentally down-regulated 9	4185.59	-3.00721	4.22648e-200
ENSG00000046653	2824	GPM6B	glycoprotein M6B	2328.38	-3.15728	7.75515e-199
ENSG00000115461	3488	IGFBP5	insulin like growth factor binding protein 5	918.391	-5.78186	1.14668e-192
ENSG00000185630	5087	PBX1	PBX homeobox 1	1290.8	-3.03741	8.23084e-190
ENSG00000112984	10112	KIF20A	kinesin family member 20A	1878.61	-2.92594	1.5978e-186
ENSG00000125285	11166	SOX21	SRY-box 21	1240.29	-3.36282	3.85619e-179
ENSG00000164125	51313	FAM198B	family with sequence similarity 198 member B	3835.69	-2.93195	2.3923e-178
ENSG00000131747	7153	TOP2A	topoisomerase (DNA) II alpha	8038.46	-2.66932	6.23956e-178
ENSG00000164434	2173	FABP7	fatty acid binding protein 7	1470.6	-3.39206	1.46708e-175
ENSG00000104368	5327	PLAT	plasminogen activator, tissue type	1327.26	-2.94656	1.90013e-172
ENSG00000156802	29028	ATAD2	ATPase family, AAA domain containing 2	1312.31	-2.16009	4.9983e-164
ENSG00000164128	4886	NPY1R	neuropeptide Y receptor Y1	658.72	-3.16363	8.02043e-160
ENSG00000137804	51203	NUSAP1	nucleolar and spindle associated protein 1	2864.43	-2.5938	6.01194e-158
ENSG00000136824	10592	SMC2	structural maintenance of chromosomes 2	1629.01	-1.89006	6.48313e-158
ENSG00000132640	22903	BTBD3	BTB domain containing 3	3605.6	-2.281	1.84968e-156
ENSG00000117724	1063	CENPF	centromere protein F	4927.56	-2.47917	3.82906e-154
ENSG00000137868	64220	STRA6	stimulated by retinoic acid 6	1645.81	-2.71599	5.33795e-154
ENSG00000177706	56975	FAM20C	FAM20C, golgi associated secretory pathway kinase	2782.63	-2.63822	4.32484e-153
ENSG00000185432	25840	METTL7A	methyltransferase like 7A	592.618	-4.40005	3.50048e-152
ENSG00000170540	23204	ARL6IP1	ADP ribosylation factor like GTPase 6 interacting protein 1	3171.82	-2.12371	1.3536e-151
ENSG00000245526	407047	MIR9-2	microRNA 9-2	1755.14	-2.21773	4.17296e-150
ENSG00000204580	780	DDR1	discoidin domain receptor tyrosine kinase 1	2579.75	-2.53401	6.21945e-149
ENSG00000148773	4288	MKI67	marker of proliferation Ki-67	6082.96	-2.70088	1.02567e-148
ENSG00000137558	51050	PI15	peptidase inhibitor 15	480.401	-4.3981	1.72603e-148
ENSG00000277586	4747	NEFL	neurofilament light	2305.53	-3.27258	2.26067e-148
ENSG00000124479	4693	NDP	NDP, norrin cystine knot growth factor	825.457	-3.74316	2.82173e-148
ENSG00000076382	10615	SPAG5	sperm associated antigen 5	1338.83	-2.28837	9.21312e-148
ENSG00000205213	55366	LGR4	leucine rich repeat containing G protein-coupled receptor 4	1034.39	-2.96412	1.11862e-147
ENSG00000137807	9493	KIF23	kinesin family member 23	1965.17	-1.81843	2.63482e-142
ENSG00000154096	7070	THY1	Thy-1 cell surface antigen	3089.4	-3.07533	3.50801e-142
ENSG00000010292	9918	NCAPD2	non-SMC condensin I complex subunit D2	2418.44	-2.01485	1.53026e-141
ENSG00000109099	5376	PMP22	peripheral myelin protein 22	2188.3	-2.67133	3.22543e-138
ENSG00000132470	3691	ITGB4	integrin subunit beta 4	4475.43	-3.05858	2.12688e-137
ENSG00000168453	55806	HR	HR, lysine demethylase and nuclear receptor corepressor	578.739	-2.68365	4.14308e-137
ENSG00000135074	8728	ADAM19	ADAM metallopeptidase domain 19	4442.6	-2.52048	9.14674e-136
ENSG00000145824	9547	CXCL14	C-X-C motif chemokine ligand 14	2314.45	-6.48	1.08089e-135
ENSG00000124766	6659	SOX4	SRY-box 4	3519.67	-2.66906	1.66198e-135
ENSG00000117632	3925	STMN1	stathmin 1	5193.94	-2.48662	2.36633e-135
ENSG00000124225	56937	PMEPA1	prostate transmembrane protein, androgen induced 1	6535.32	-2.8233	9.7197e-135
ENSG00000184486	5454	POU3F2	POU class 3 homeobox 2	1982.67	-2.39272	2.24126e-133
ENSG00000132688	10763	NES	nestin	7540.54	-1.69795	9.80018e-131
ENSG00000071282	29995	LMCD1	LIM and cysteine rich domains 1	461.663	-3.92351	2.28461e-129
ENSG00000127863	55504	TNFRSF19	TNF receptor superfamily member 19	800.735	-3.22909	5.80432e-129
ENSG00000145386	890	CCNA2	cyclin A2	1826.04	-2.54748	6.32948e-129
ENSG00000156970	701	BUB1B	BUB1 mitotic checkpoint serine/threonine kinase B	812.986	-2.23501	1.32604e-128
ENSG00000118193	9928	KIF14	kinesin family member 14	1050.58	-1.93825	1.4054e-126
ENSG00000113657	1809	DPYSL3	dihydropyrimidinase like 3	6796.98	-1.75052	2.48489e-126
ENSG00000166165	1152	CKB	creatine kinase B	3422.73	-2.82253	4.19469e-126
ENSG00000075218	51512	GTSE1	G2 and S-phase expressed 1	700.504	-2.48493	4.54176e-126
ENSG00000113368	4001	LMNB1	lamin B1	1893.98	-2.47273	4.74462e-125
ENSG00000176890	7298	TYMS	thymidylate synthetase	1511.34	-2.66898	4.74462e-125
ENSG00000082497	56256	SERTAD4	SERTA domain containing 4	362.826	-4.25766	5.80845e-125
ENSG00000099282	23555	TSPAN15	tetraspanin 15	1745.18	-2.83461	2.27302e-122
ENSG00000112742	7272	TTK	TTK protein kinase	897.058	-2.01719	2.71732e-122
ENSG00000168078	55872	PBK	PDZ binding kinase	1110.01	-2.3909	1.45813e-121
ENSG00000161011	8878	SQSTM1	sequestosome 1	6608.24	2.61067	1.7283e-119
ENSG00000196196	646962	HRCT1	histidine rich carboxyl terminus 1	534.774	-3.84197	7.35222e-117
ENSG00000171848	6241	RRM2	ribonucleotide reductase regulatory subunit M2	2073.85	-2.46509	8.08393e-117
ENSG00000109805	64151	NCAPG	non-SMC condensin I complex subunit G	1460.66	-2.02723	2.67031e-116
ENSG00000169991	126917	IFFO2	intermediate filament family orphan 2	1299.41	-2.23658	2.9753e-116
ENSG00000167191	51704	GPRC5B	G protein-coupled receptor class C group 5 member B	683.413	-3.51216	5.38753e-115
ENSG00000189057	374393	FAM111B	family with sequence similarity 111 member B	420.449	-3.41027	7.27129e-115
ENSG00000214357	54492	NEURL1B	neuralized E3 ubiquitin protein ligase 1B	458.326	-4.17189	8.83153e-115
ENSG00000182985	23705	CADM1	cell adhesion molecule 1	2476.68	-2.15488	1.19802e-113
ENSG00000164104	3148	HMGB2	high mobility group box 2	2539.82	-1.66113	2.1401e-113
ENSG00000125945	80818	ZNF436	zinc finger protein 436	877.484	-2.03633	2.48523e-113
ENSG00000164176	10085	EDIL3	EGF like repeats and discoidin domains 3	10041.1	-1.69225	1.24714e-112
ENSG00000169908	4071	TM4SF1	transmembrane 4 L six family member 1	1070.61	-2.09389	2.0366e-112
ENSG00000090889	24137	KIF4A	kinesin family member 4A	1507.65	-2.10452	3.42357e-112
ENSG00000171604	51523	CXXC5	CXXC finger protein 5	1483.83	-2.63063	6.49099e-112
ENSG00000242808	347689	SOX2-OT	SOX2 overlapping transcript	1141.93	-2.12229	1.50418e-111
ENSG00000171241	79801	SHCBP1	SHC binding and spindle associated 1	2998.4	-1.79689	2.11404e-111
ENSG00000260916	9236	CCPG1	cell cycle progression 1	670.985	2.39187	3.12948e-111
ENSG00000196365	9361	LONP1	lon peptidase 1, mitochondrial	3685.37	1.69995	3.13901e-111
ENSG00000166106	170689	ADAMTS15	ADAM metallopeptidase with thrombospondin type 1 motif 15	720.119	-3.03022	3.57239e-111
ENSG00000116133	1718	DHCR24	24-dehydrocholesterol reductase	7075.71	-1.83101	3.32469e-110
ENSG00000088325	22974	TPX2	TPX2, microtubule nucleation factor	3244.29	-1.65793	6.94361e-110
ENSG00000138160	3832	KIF11	kinesin family member 11	2187.77	-1.93678	2.76068e-109
ENSG00000013810	10460	TACC3	transforming acidic coiled-coil containing protein 3	1986.09	-1.80209	8.23117e-109
ENSG00000178999	9212	AURKB	aurora kinase B	737.48	-2.32582	1.38372e-108
ENSG00000125398	6662	SOX9	SRY-box 9	2102.03	-2.25578	2.34747e-108
ENSG00000134222	84722	PSRC1	proline and serine rich coiled-coil 1	717.406	-2.58885	9.30397e-108
ENSG00000198431	7296	TXNRD1	thioredoxin reductase 1	13696.1	2.35839	1.5541e-107
ENSG00000110675	55531	ELMOD1	ELMO domain containing 1	339.377	-3.70314	5.48404e-107
ENSG00000065320	9423	NTN1	netrin 1	820.35	-2.92989	9.29718e-107
ENSG00000072571	3161	HMMR	hyaluronan mediated motility receptor	940.545	-2.1502	5.21902e-106
ENSG00000196954	837	CASP4	caspase 4	523.685	2.3733	2.00052e-105
ENSG00000198826	9824	ARHGAP11A	Rho GTPase activating protein 11A	1070.08	-1.84381	2.9833e-105
ENSG00000198901	9055	PRC1	protein regulator of cytokinesis 1	2532.48	-2.09748	5.8625e-105
ENSG00000116016	2034	EPAS1	endothelial PAS domain protein 1	1242.19	2.62123	7.53187e-105
ENSG00000170312	983	CDK1	cyclin dependent kinase 1	2158.09	-2.40673	8.52235e-105
ENSG00000169679	699	BUB1	BUB1 mitotic checkpoint serine/threonine kinase	1333.63	-2.11545	2.81111e-104
ENSG00000068078	2261	FGFR3	fibroblast growth factor receptor 3	593.607	-2.72496	3.37328e-104
ENSG00000185585	169611	OLFML2A	olfactomedin like 2A	435.964	-3.38117	1.37786e-103
ENSG00000072310	6720	SREBF1	sterol regulatory element binding transcription factor 1	2231.98	-2.18068	2.09067e-103
ENSG00000110619	833	CARS	cysteinyl-tRNA synthetase	1146.93	2.0668	1.79527e-102
ENSG00000187634	148398	SAMD11	sterile alpha motif domain containing 11	495.706	-2.98771	2.54604e-101
ENSG00000185624	5034	P4HB	prolyl 4-hydroxylase subunit beta	13073.1	1.17391	1.04058e-100
ENSG00000162063	899	CCNF	cyclin F	589.552	-2.5142	1.39002e-100
ENSG00000087086	2512	FTL	ferritin light chain	46062.7	1.90664	3.14167e-100
ENSG00000165434	283209	PGM2L1	phosphoglucomutase 2 like 1	1283.9	-1.70436	1.0395e-99
ENSG00000040275	54908	SPDL1	spindle apparatus coiled-coil protein 1	1512.44	-1.6304	1.08378e-99
ENSG00000272841	NA	NA	NA	2273.79	-2.41962	1.5989e-99
ENSG00000153879	1054	CEBPG	CCAAT/enhancer binding protein gamma	2161.4	1.86813	1.72061e-99
ENSG00000164976	57462	KIAA1161	KIAA1161	405.959	-3.04293	3.48796e-99
ENSG00000114346	1894	ECT2	epithelial cell transforming 2	1547.57	-1.67943	4.49977e-99
ENSG00000227036	400619	LINC00511	long intergenic non-protein coding RNA 511	889.651	-2.64781	6.25666e-99
ENSG00000116584	9181	ARHGEF2	Rho/Rac guanine nucleotide exchange factor 2	2221.51	2.63931	7.41115e-99
ENSG00000134243	6272	SORT1	sortilin 1	4093.4	-1.73193	1.62272e-98
ENSG00000196562	55959	SULF2	sulfatase 2	1813.25	-1.85053	4.69235e-98
ENSG00000099194	6319	SCD	stearoyl-CoA desaturase	12926.3	-1.83676	4.70917e-98
ENSG00000157456	9133	CCNB2	cyclin B2	1538.65	-2.05673	2.18192e-97
ENSG00000120802	7112	TMPO	thymopoietin	2183.44	-1.59862	2.32096e-97
ENSG00000197959	26052	DNM3	dynamin 3	761.178	-1.96554	1.63412e-96
ENSG00000244405	2119	ETV5	ETS variant 5	1325.35	1.69786	2.36542e-96
ENSG00000166750	162394	SLFN5	schlafen family member 5	1413.97	2.11539	2.69257e-96
ENSG00000167900	7083	TK1	thymidine kinase 1	1523.4	-2.48563	5.61965e-96
ENSG00000105011	55723	ASF1B	anti-silencing function 1B histone chaperone	991.265	-2.65403	7.19947e-96
ENSG00000069275	64710	NUCKS1	nuclear casein kinase and cyclin dependent kinase substrate 1	10510.8	-1.46446	2.09083e-95
ENSG00000065911	10797	MTHFD2	methylenetetrahydrofolate dehydrogenase (NADP+ dependent) 2, methenyltetrahydrofolate cyclohydrolase	2944.77	2.43553	2.586e-95
ENSG00000204262	1290	COL5A2	collagen type V alpha 2 chain	3281.03	-1.72745	1.12587e-94
ENSG00000140941	81631	MAP1LC3B	microtubule associated protein 1 light chain 3 beta	3368.92	2.24187	2.43868e-94
ENSG00000066279	259266	ASPM	abnormal spindle microtubule assembly	2101.12	-2.36495	4.93606e-94
ENSG00000161800	29127	RACGAP1	Rac GTPase activating protein 1	1186.54	-1.72198	5.20946e-94
ENSG00000153944	124540	MSI2	musashi RNA binding protein 2	2613.49	-1.7085	7.23265e-94
ENSG00000142945	11004	KIF2C	kinesin family member 2C	1455.07	-1.91746	3.54464e-93
ENSG00000138778	1062	CENPE	centromere protein E	1121.86	-1.84342	7.43558e-93
ENSG00000213347	83463	MXD3	MAX dimerization protein 3	353.924	-3.25708	8.24445e-93
ENSG00000146250	167681	PRSS35	protease, serine 35	283.545	-3.99956	1.04296e-92
ENSG00000255690	9865	TRIL	TLR4 interactor with leucine rich repeats	352.002	-5.36358	1.08568e-92
ENSG00000140937	1009	CDH11	cadherin 11	674.096	-2.26443	1.42795e-92
ENSG00000125826	10616	RBCK1	RANBP2-type and C3HC4-type zinc finger containing 1	1223.27	1.82848	6.13779e-92
ENSG00000196628	6925	TCF4	transcription factor 4	760.412	-1.93742	1.24996e-91
ENSG00000138182	9585	KIF20B	kinesin family member 20B	1497.17	-1.53228	1.8718e-91
ENSG00000138180	55165	CEP55	centrosomal protein 55	1879.42	-1.85612	2.05372e-91
ENSG00000117399	991	CDC20	cell division cycle 20	2031.65	-1.99521	2.16589e-91
ENSG00000052749	23223	RRP12	ribosomal RNA processing 12 homolog	1463.81	1.95915	2.55202e-91
ENSG00000140525	55215	FANCI	Fanconi anemia complementation group I	1554.54	-1.5408	5.12347e-91
ENSG00000166123	84706	GPT2	glutamic--pyruvic transaminase 2	2153.6	2.11414	6.93078e-91
ENSG00000134986	9315	NREP	neuronal regeneration related protein	508.711	-3.00165	8.70637e-91
ENSG00000061337	11178	LZTS1	leucine zipper tumor suppressor 1	437.605	-3.10462	9.45443e-91
ENSG00000149503	3619	INCENP	inner centromere protein	738.875	-2.33977	1.07244e-90
ENSG00000150687	11098	PRSS23	protease, serine 23	3415.22	-1.84207	1.27315e-90
ENSG00000129116	23022	PALLD	palladin, cytoskeletal associated protein	6488.55	-1.56597	1.76633e-90
ENSG00000003096	90293	KLHL13	kelch like family member 13	881.395	-2.15696	7.4724e-90
ENSG00000058262	29927	SEC61A1	Sec61 translocon alpha 1 subunit	8119.81	1.13354	1.49701e-89
ENSG00000143228	83540	NUF2	NUF2, NDC80 kinetochore complex component	729.513	-2.36592	1.66441e-89
ENSG00000163032	7447	VSNL1	visinin like 1	369.144	-3.40774	4.32084e-89
ENSG00000001084	2729	GCLC	glutamate-cysteine ligase catalytic subunit	1262.49	1.93064	6.28085e-89
ENSG00000101447	81610	FAM83D	family with sequence similarity 83 member D	937.081	-2.26949	8.40684e-89
ENSG00000170006	201799	TMEM154	transmembrane protein 154	831.062	1.95834	1.51289e-88
ENSG00000168077	51435	SCARA3	scavenger receptor class A member 3	478.493	-2.71684	6.32063e-88
ENSG00000111206	2305	FOXM1	forkhead box M1	1479.89	-1.72185	6.71689e-88
ENSG00000188338	10991	SLC38A3	solute carrier family 38 member 3	1367.22	-4.54769	8.83171e-88
ENSG00000120742	27230	SERP1	stress associated endoplasmic reticulum protein 1	2046.91	1.73522	1.1799e-87
ENSG00000114480	2632	GBE1	1,4-alpha-glucan branching enzyme 1	2776.28	1.75098	3.26499e-87
ENSG00000135919	5270	SERPINE2	serpin family E member 2	1452.58	1.90358	3.96459e-87
ENSG00000148541	220965	FAM13C	family with sequence similarity 13 member C	302.089	-3.88561	4.08183e-87
ENSG00000134824	9415	FADS2	fatty acid desaturase 2	1981.63	-2.50083	7.33918e-87
ENSG00000092621	26227	PHGDH	phosphoglycerate dehydrogenase	15883.7	2.15081	2.06883e-86
ENSG00000177098	6330	SCN4B	sodium voltage-gated channel beta subunit 4	283.712	-3.76	2.42247e-86
ENSG00000277443	4082	MARCKS	myristoylated alanine rich protein kinase C substrate	7003.25	-1.82314	2.77549e-86
ENSG00000117143	6675	UAP1	UDP-N-acetylglucosamine pyrophosphorylase 1	2626.14	2.03123	2.87106e-86
ENSG00000019144	23187	PHLDB1	pleckstrin homology like domain family B member 1	1398.68	-1.87254	2.98373e-86
ENSG00000080986	10403	NDC80	NDC80, kinetochore complex component	795.201	-1.86436	3.21561e-86
ENSG00000150527	4253	MIA2	melanoma inhibitory activity 2	550.371	2.22776	6.04407e-86
ENSG00000184602	8303	SNN	stannin	572.041	-2.55911	9.49038e-86
ENSG00000120889	8795	TNFRSF10B	TNF receptor superfamily member 10b	1994.01	2.04668	1.42227e-85
ENSG00000085377	5550	PREP	prolyl endopeptidase	1842.73	-1.7834	3.74966e-85
ENSG00000128487	92521	SPECC1	sperm antigen with calponin homology and coiled-coil domains 1	1578.51	-1.60217	5.14069e-85
ENSG00000113013	3313	HSPA9	heat shock protein family A (Hsp70) member 9	10516.5	1.86559	8.22872e-85
ENSG00000237649	3833	KIFC1	kinesin family member C1	1034.37	-2.38311	8.96668e-85
ENSG00000167325	6240	RRM1	ribonucleotide reductase catalytic subunit M1	1839.04	-1.60976	1.66701e-84
ENSG00000065534	4638	MYLK	myosin light chain kinase	3536.25	-2.09453	3.27394e-84
ENSG00000109654	23321	TRIM2	tripartite motif containing 2	5207.29	-1.78497	3.3381e-84
ENSG00000136108	26586	CKAP2	cytoskeleton associated protein 2	1590.76	-1.41035	9.51904e-84
ENSG00000122952	11130	ZWINT	ZW10 interacting kinetochore protein	1063.7	-2.26719	9.52333e-84
ENSG00000137812	57082	KNL1	kinetochore scaffold 1	646.158	-2.02434	9.92248e-84
ENSG00000122786	800	CALD1	caldesmon 1	3778.92	-1.87646	1.22693e-83
ENSG00000031698	6301	SARS	seryl-tRNA synthetase	3584.09	1.76954	2.92652e-83
ENSG00000183671	2825	GPR1	G protein-coupled receptor 1	342.569	3.47463	3.34665e-83
ENSG00000198380	2673	GFPT1	glutamine--fructose-6-phosphate transaminase 1	3260.1	2.36919	4.78388e-83
ENSG00000120437	39	ACAT2	acetyl-CoA acetyltransferase 2	839.127	-2.0093	1.53226e-82
ENSG00000184575	11260	XPOT	exportin for tRNA	3547.05	1.94057	2.69484e-82
ENSG00000196305	3376	IARS	isoleucyl-tRNA synthetase	5160.52	1.89439	3.51909e-82
ENSG00000104332	6422	SFRP1	secreted frizzled related protein 1	900.544	-1.82537	4.19199e-82
ENSG00000090861	16	AARS	alanyl-tRNA synthetase	3583.24	1.49195	4.47686e-82
ENSG00000122218	1314	COPA	coatomer protein complex subunit alpha	5773.66	1.3183	5.09445e-82
ENSG00000132646	5111	PCNA	proliferating cell nuclear antigen	2526.52	-1.78406	6.3664e-82
ENSG00000120686	51569	UFM1	ubiquitin fold modifier 1	1575.13	1.85522	1.16175e-81
ENSG00000168209	54541	DDIT4	DNA damage inducible transcript 4	1401.39	2.73297	1.44699e-81
ENSG00000089685	332	BIRC5	baculoviral IAP repeat containing 5	2196.63	-2.27518	3.14694e-81
ENSG00000120053	2805	GOT1	glutamic-oxaloacetic transaminase 1	1344.74	1.90276	5.56948e-81
ENSG00000111913	9750	RIPOR2	RHO family interacting cell polarization regulator 2	272.268	-3.07268	5.85682e-81
ENSG00000116962	4811	NID1	nidogen 1	2315.42	-1.38414	5.96017e-81
ENSG00000198053	140885	SIRPA	signal regulatory protein alpha	1228.83	-2.07825	6.0727e-81
ENSG00000122779	8805	TRIM24	tripartite motif containing 24	1272.86	-1.95919	7.43191e-81
ENSG00000146373	154214	RNF217	ring finger protein 217	1228.87	-1.43229	2.99828e-80
ENSG00000205403	3426	CFI	complement factor I	599.952	-2.12388	1.17287e-79
ENSG00000115738	3398	ID2	inhibitor of DNA binding 2, HLH protein	668.898	-1.80205	1.62099e-79
ENSG00000100219	7494	XBP1	X-box binding protein 1	1248.05	1.83281	1.77055e-79
ENSG00000102384	2491	CENPI	centromere protein I	484.343	-2.22122	2.0124e-79
ENSG00000126016	154796	AMOT	angiomotin	1105.21	-1.70184	3.21743e-79
ENSG00000108821	1277	COL1A1	collagen type I alpha 1 chain	317.765	-2.71529	3.41621e-79
ENSG00000105855	3696	ITGB8	integrin subunit beta 8	1886.22	-1.49595	4.51714e-79
ENSG00000122966	11113	CIT	citron rho-interacting serine/threonine kinase	655.79	-2.15874	5.02118e-79
ENSG00000122863	9469	CHST3	carbohydrate sulfotransferase 3	2369.96	-1.64715	6.13695e-79
ENSG00000163535	151246	SGO2	shugoshin 2	651.617	-1.88579	1.43002e-78
ENSG00000150551	116372	LYPD1	LY6/PLAUR domain containing 1	494.667	-3.01309	1.79903e-78
ENSG00000173786	1267	CNP	2',3'-cyclic nucleotide 3' phosphodiesterase	2399.34	-1.67502	2.37262e-78
ENSG00000125637	23550	PSD4	pleckstrin and Sec7 domain containing 4	252.136	-3.50393	4.27788e-78
ENSG00000171444	4163	MCC	mutated in colorectal cancers	1581.39	-1.74431	1.16837e-77
ENSG00000091129	4897	NRCAM	neuronal cell adhesion molecule	1489.25	1.71677	1.26599e-77
ENSG00000112139	266727	MDGA1	MAM domain containing glycosylphosphatidylinositol anchor 1	555.113	-2.13391	1.32314e-77
ENSG00000121152	23397	NCAPH	non-SMC condensin I complex subunit H	540.355	-2.25726	1.96305e-77
ENSG00000166986	4141	MARS	methionyl-tRNA synthetase	2701.67	1.75137	2.85189e-77
ENSG00000156510	80201	HKDC1	hexokinase domain containing 1	764.18	2.8357	5.06941e-77
ENSG00000075461	27092	CACNG4	calcium voltage-gated channel auxiliary subunit gamma 4	328.867	-2.4763	1.40901e-76
ENSG00000168374	378	ARF4	ADP ribosylation factor 4	7066.93	2.10764	1.9229e-76
ENSG00000182481	3838	KPNA2	karyopherin subunit alpha 2	5024.12	-1.67867	4.04338e-76
ENSG00000113810	10051	SMC4	structural maintenance of chromosomes 4	2280.92	-1.31097	4.44193e-76
ENSG00000142173	1292	COL6A2	collagen type VI alpha 2 chain	4051	1.06499	6.39678e-76
ENSG00000035499	55789	DEPDC1B	DEP domain containing 1B	456.635	-2.28256	1.7038e-75
ENSG00000134057	891	CCNB1	cyclin B1	3280.99	-2.29747	1.44366e-74
ENSG00000162595	9077	DIRAS3	DIRAS family GTPase 3	364.036	-3.13549	1.89404e-74
ENSG00000143126	1952	CELSR2	cadherin EGF LAG seven-pass G-type receptor 2	1469.74	-1.95787	2.54698e-74
ENSG00000240184	5098	PCDHGC3	protocadherin gamma subfamily C, 3	1179.98	-2.00216	4.27234e-74
ENSG00000134684	8565	YARS	tyrosyl-tRNA synthetase	2796.6	1.86375	6.66519e-74
ENSG00000116717	1647	GADD45A	growth arrest and DNA damage inducible alpha	1147.15	2.14766	1.57382e-73
ENSG00000068489	55771	PRR11	proline rich 11	1547.55	-1.40471	1.76813e-73
ENSG00000167680	10501	SEMA6B	semaphorin 6B	1171.95	-1.90898	1.88218e-73
ENSG00000171320	157570	ESCO2	establishment of sister chromatid cohesion N-acetyltransferase 2	358.214	-2.51908	3.93014e-73
ENSG00000164303	133121	ENPP6	ectonucleotide pyrophosphatase/phosphodiesterase 6	435.799	-2.70872	5.30351e-73
ENSG00000126785	57381	RHOJ	ras homolog family member J	408.115	-2.57869	9.24225e-73
ENSG00000085063	966	CD59	CD59 molecule (CD59 blood group)	4089.94	-1.42446	9.7672e-73
ENSG00000179918	22928	SEPHS2	selenophosphate synthetase 2	1620.85	1.56394	1.08858e-72
ENSG00000067715	6857	SYT1	synaptotagmin 1	436.273	2.95131	1.17442e-72
ENSG00000121957	29899	GPSM2	G-protein signaling modulator 2	671.933	-1.68579	2.01826e-72
ENSG00000138166	1847	DUSP5	dual specificity phosphatase 5	359.092	2.85948	4.06003e-72
ENSG00000123485	55355	HJURP	Holliday junction recognition protein	622.898	-2.06164	4.81877e-72
ENSG00000156136	1633	DCK	deoxycytidine kinase	1161.53	-1.57334	7.21204e-72
ENSG00000127526	79939	SLC35E1	solute carrier family 35 member E1	1747.04	1.3241	7.8139e-72
ENSG00000065328	55388	MCM10	minichromosome maintenance 10 replication initiation factor	340.541	-2.41805	8.93045e-72
ENSG00000103257	8140	SLC7A5	solute carrier family 7 member 5	8381.52	1.70612	1.12476e-71
ENSG00000148411	138151	NACC2	NACC family member 2	1875.7	-1.63943	1.21053e-71
ENSG00000182871	80781	COL18A1	collagen type XVIII alpha 1 chain	1640.46	-1.73695	1.64901e-71
ENSG00000113407	6897	TARS	threonyl-tRNA synthetase	3569.07	1.26183	2.30634e-71
ENSG00000196352	1604	CD55	CD55 molecule (Cromer blood group)	581.909	2.94921	2.79944e-71
ENSG00000104635	23516	SLC39A14	solute carrier family 39 member 14	1632.81	1.62797	2.84753e-71
ENSG00000184661	157313	CDCA2	cell division cycle associated 2	619.877	-2.3179	7.25636e-71
ENSG00000154380	55740	ENAH	enabled homolog (Drosophila)	5354.45	-1.40616	7.88624e-71
ENSG00000115902	6509	SLC1A4	solute carrier family 1 member 4	1007.68	2.65075	1.16921e-70
ENSG00000276644	1602	DACH1	dachshund family transcription factor 1	282.653	-2.58154	1.39011e-70
ENSG00000154122	56172	ANKH	ANKH inorganic pyrophosphate transport regulator	2193.91	-1.65647	1.52243e-70
ENSG00000261824	148189	LINC00662	long intergenic non-protein coding RNA 662	657.413	2.54112	1.74301e-70
ENSG00000165891	144455	E2F7	E2F transcription factor 7	1030.92	2.17169	2.29068e-70
ENSG00000145555	4651	MYO10	myosin X	1749.41	-1.6788	2.31153e-70
ENSG00000179300	203430	RTL3	retrotransposon Gag like 3	207.286	-3.3532	2.38203e-70
ENSG00000043143	23338	JADE2	jade family PHD finger 2	919.699	-1.45147	5.6061e-70
ENSG00000139263	121227	LRIG3	leucine rich repeats and immunoglobulin like domains 3	667.06	-2.00143	7.30433e-70
ENSG00000155961	116442	RAB39B	RAB39B, member RAS oncogene family	379.321	2.37294	8.53439e-70
ENSG00000065802	51665	ASB1	ankyrin repeat and SOCS box containing 1	1506.31	1.44445	1.69484e-69
ENSG00000243244	11037	STON1	stonin 1	205.657	-4.05949	2.12814e-69
ENSG00000006652	3475	IFRD1	interferon related developmental regulator 1	1843.62	1.81005	2.24536e-69
ENSG00000117650	4751	NEK2	NIMA related kinase 2	562.172	-2.01455	2.67562e-69
ENSG00000168675	753	LDLRAD4	low density lipoprotein receptor class A domain containing 4	499.662	-2.14004	3.42652e-69
ENSG00000144554	2177	FANCD2	Fanconi anemia complementation group D2	714.874	-1.80551	6.47418e-69
ENSG00000142731	10733	PLK4	polo like kinase 4	598.702	-2.00855	7.47094e-69
ENSG00000101294	81502	HM13	histocompatibility minor 13	3331.39	1.41979	7.57532e-69
ENSG00000070961	490	ATP2B1	ATPase plasma membrane Ca2+ transporting 1	1857.67	1.94024	8.1478e-69
ENSG00000153132	1047	CLGN	calmegin	1479.38	1.85169	1.14087e-68
ENSG00000182628	348235	SKA2	spindle and kinetochore associated complex subunit 2	1830.8	-1.71416	2.2318e-68
ENSG00000071537	6400	SEL1L	SEL1L ERAD E3 ligase adaptor subunit	2668.92	1.61771	4.6071e-68
ENSG00000169710	2194	FASN	fatty acid synthase	6120.21	-1.31141	5.14819e-68
ENSG00000169607	150468	CKAP2L	cytoskeleton associated protein 2 like	533.053	-1.94486	5.22294e-68
ENSG00000135821	2752	GLUL	glutamate-ammonia ligase	1689.92	-1.24507	6.6061e-68
ENSG00000186185	146909	KIF18B	kinesin family member 18B	570.121	-2.19785	1.43784e-67
ENSG00000139044	283358	B4GALNT3	beta-1,4-N-acetyl-galactosaminyltransferase 3	483.274	-2.94484	1.45308e-67
ENSG00000101911	5634	PRPS2	phosphoribosyl pyrophosphate synthetase 2	2203.93	-1.5507	1.56295e-67
ENSG00000187735	6917	TCEA1	transcription elongation factor A1	1357.48	1.424	2.64838e-67
ENSG00000140961	29948	OSGIN1	oxidative stress induced growth inhibitor 1	321.384	2.90621	3.14014e-67
ENSG00000007968	1870	E2F2	E2F transcription factor 2	254.919	-3.20546	1.19457e-66
ENSG00000187720	79875	THSD4	thrombospondin type 1 domain containing 4	369.537	2.51512	1.59407e-66
ENSG00000163637	166336	PRICKLE2	prickle planar cell polarity protein 2	385.488	-2.09648	1.64962e-66
ENSG00000104738	4173	MCM4	minichromosome maintenance complex component 4	2079.06	-1.79376	2.01447e-66
ENSG00000131153	51659	GINS2	GINS complex subunit 2	648.509	-2.17297	2.29342e-66
ENSG00000140416	7168	TPM1	tropomyosin 1 (alpha)	2570.51	-1.42015	2.4756e-66
ENSG00000129195	54478	PIMREG	PICALM interacting mitotic regulator	613.18	-2.46472	3.0383e-66
ENSG00000115163	1058	CENPA	centromere protein A	471.097	-2.10678	3.1377e-66
ENSG00000136492	83990	BRIP1	BRCA1 interacting protein C-terminal helicase 1	372.265	-2.19177	4.56866e-66
ENSG00000087494	5744	PTHLH	parathyroid hormone like hormone	1672.05	1.54435	9.85503e-66
ENSG00000124813	860	RUNX2	runt related transcription factor 2	884.017	-1.52482	1.30866e-65
ENSG00000101057	4605	MYBL2	MYB proto-oncogene like 2	1543.28	-2.3621	1.48347e-65
ENSG00000227640	100507533	SOX21-AS1	SOX21 antisense RNA 1 (head to head)	555.254	-2.26567	1.50586e-65
ENSG00000185022	23764	MAFF	MAF bZIP transcription factor F	271.708	2.92696	2.92908e-65
ENSG00000146918	54892	NCAPG2	non-SMC condensin II complex subunit G2	2209.55	-1.45359	3.95497e-65
ENSG00000094916	23468	CBX5	chromobox 5	2308.78	-1.29911	6.55674e-65
ENSG00000128951	1854	DUT	deoxyuridine triphosphatase	1213.31	-1.63944	6.58691e-65
ENSG00000073150	56666	PANX2	pannexin 2	340.438	2.01598	1.11686e-64
ENSG00000228716	1719	DHFR	dihydrofolate reductase	572.185	-1.95896	1.57619e-64
ENSG00000182934	6734	SRPRA	SRP receptor alpha subunit	4606.26	1.26456	3.00823e-64
ENSG00000183010	5831	PYCR1	pyrroline-5-carboxylate reductase 1	825.348	1.88008	3.61257e-64
ENSG00000166851	5347	PLK1	polo like kinase 1	1196.02	-2.29843	4.6901e-64
ENSG00000142910	64129	TINAGL1	tubulointerstitial nephritis antigen like 1	308.208	-2.87004	6.03986e-64
ENSG00000175063	11065	UBE2C	ubiquitin conjugating enzyme E2 C	1233.07	-2.12242	6.74238e-64
ENSG00000242802	9907	AP5Z1	adaptor related protein complex 5 zeta 1 subunit	707.868	1.54264	9.85891e-64
ENSG00000176046	26471	NUPR1	nuclear protein 1, transcriptional regulator	305.533	3.0902	1.04008e-63
ENSG00000105894	5764	PTN	pleiotrophin	1348.87	-1.69524	1.09994e-63
ENSG00000171873	146	ADRA1D	adrenoceptor alpha 1D	873.439	-2.07181	1.45456e-63
ENSG00000119403	26147	PHF19	PHD finger protein 19	870.717	-1.64144	1.48362e-63
ENSG00000106638	26608	TBL2	transducin beta like 2	1089.58	1.38853	1.80226e-63
ENSG00000149177	5795	PTPRJ	protein tyrosine phosphatase, receptor type J	1626.46	-1.71062	2.23468e-63
ENSG00000021300	58473	PLEKHB1	pleckstrin homology domain containing B1	216.375	-3.15117	2.40258e-63
ENSG00000108433	9570	GOSR2	golgi SNAP receptor complex member 2	1117.5	1.52083	2.89809e-63
ENSG00000172432	54676	GTPBP2	GTP binding protein 2	1793.63	2.11151	2.98524e-63
ENSG00000159399	3099	HK2	hexokinase 2	1242.34	1.97832	3.42365e-63
ENSG00000166803	9768	PCLAF	PCNA clamp associated factor	416.919	-2.31649	9.10446e-63
ENSG00000115159	2820	GPD2	glycerol-3-phosphate dehydrogenase 2	1543.23	-1.29353	1.23949e-62
ENSG00000168386	11259	FILIP1L	filamin A interacting protein 1 like	354.235	-2.61695	4.20995e-62
ENSG00000105928	1687	DFNA5	DFNA5, deafness associated tumor suppressor	793.085	1.82302	6.70479e-62
ENSG00000109846	1410	CRYAB	crystallin alpha B	187.422	-4.71711	7.28601e-62
ENSG00000012171	7869	SEMA3B	semaphorin 3B	410.36	1.98882	7.3465e-62
ENSG00000186871	54821	ERCC6L	ERCC excision repair 6 like, spindle assembly checkpoint helicase	331.796	-2.20828	7.45344e-62
ENSG00000079931	26002	MOXD1	monooxygenase DBH like 1	2331.24	-1.53154	7.73642e-62
ENSG00000107175	10488	CREB3	cAMP responsive element binding protein 3	1459	1.34209	1.25475e-61
ENSG00000104967	4858	NOVA2	NOVA alternative splicing regulator 2	539.262	-1.94874	1.27092e-61
ENSG00000130707	445	ASS1	argininosuccinate synthase 1	199.158	3.73077	1.34923e-61
ENSG00000008441	4784	NFIX	nuclear factor I X	2964.45	-1.45878	1.48567e-61
ENSG00000133466	114904	C1QTNF6	C1q and TNF related 6	305.851	-2.62505	1.67642e-61
ENSG00000144867	58477	SRPRB	SRP receptor beta subunit	1313.21	1.41743	1.85929e-61
ENSG00000221968	3995	FADS3	fatty acid desaturase 3	661.248	1.75872	2.01197e-61
ENSG00000152253	57405	SPC25	SPC25, NDC80 kinetochore complex component	250.65	-2.64456	2.76113e-61
ENSG00000077092	5915	RARB	retinoic acid receptor beta	702.025	-1.86374	3.6599e-61
ENSG00000158560	1780	DYNC1I1	dynein cytoplasmic 1 intermediate chain 1	756.892	-1.517	3.6599e-61
ENSG00000138346	1763	DNA2	DNA replication helicase/nuclease 2	397.278	-1.96948	4.04665e-61
ENSG00000186480	3638	INSIG1	insulin induced gene 1	1710.05	-1.44173	4.72769e-61
ENSG00000025796	11231	SEC63	SEC63 homolog, protein translocation regulator	2698.4	1.30344	5.09905e-61
ENSG00000121060	7706	TRIM25	tripartite motif containing 25	1472.2	1.59088	5.39422e-61
ENSG00000149428	10525	HYOU1	hypoxia up-regulated 1	6699.18	1.49687	7.35666e-61
ENSG00000189403	3146	HMGB1	high mobility group box 1	2863.79	-1.68588	9.19955e-61
ENSG00000148677	27063	ANKRD1	ankyrin repeat domain 1	2364.65	-1.63352	9.61744e-61
ENSG00000123374	1017	CDK2	cyclin dependent kinase 2	656.221	-1.75221	2.03969e-60
ENSG00000187840	1978	EIF4EBP1	eukaryotic translation initiation factor 4E binding protein 1	952.752	2.0154	3.81016e-60
ENSG00000148120	84909	C9orf3	chromosome 9 open reading frame 3	401.796	-2.16913	3.84768e-60
ENSG00000179761	51268	PIPOX	pipecolic acid and sarcosine oxidase	1244.48	-2.22583	3.84768e-60
ENSG00000100196	11015	KDELR3	KDEL endoplasmic reticulum protein retention receptor 3	772.22	1.51676	3.85644e-60
ENSG00000272398	100133941	CD24	CD24 molecule	1460.55	-1.71542	3.89256e-60
ENSG00000107984	22943	DKK1	dickkopf WNT signaling pathway inhibitor 1	5135.56	1.85324	4.8837e-60
ENSG00000009709	5081	PAX7	paired box 7	538.682	-1.83548	8.58192e-60
ENSG00000156453	5097	PCDH1	protocadherin 1	471.837	2.16611	9.8815e-60
ENSG00000164109	4085	MAD2L1	mitotic arrest deficient 2 like 1	1594.78	-1.47547	1.01974e-59
ENSG00000197860	54557	SGTB	small glutamine rich tetratricopeptide repeat containing beta	490.589	2.2621	1.64303e-59
ENSG00000163507	57650	KIAA1524	KIAA1524	550.373	-1.69197	1.82525e-59
ENSG00000120093	3213	HOXB3	homeobox B3	1667.41	-1.65569	1.96471e-59
ENSG00000143401	81611	ANP32E	acidic nuclear phosphoprotein 32 family member E	2524.22	-1.14971	5.81198e-59
ENSG00000265808	9554	SEC22B	SEC22 homolog B, vesicle trafficking protein (gene/pseudogene)	10867.7	1.07599	1.69059e-58
ENSG00000104980	10469	TIMM44	translocase of inner mitochondrial membrane 44	745.966	1.37706	1.93309e-58
ENSG00000134690	55143	CDCA8	cell division cycle associated 8	801.283	-2.02846	2.22639e-58
ENSG00000136295	80727	TTYH3	tweety family member 3	6085.47	-1.39811	3.33695e-58
ENSG00000163811	23160	WDR43	WD repeat domain 43	1235.84	1.67754	5.93266e-58
ENSG00000101003	9837	GINS1	GINS complex subunit 1	474.797	-2.07604	7.04709e-58
ENSG00000029993	3149	HMGB3	high mobility group box 3	1959.55	-1.44875	1.06222e-57
ENSG00000180447	2619	GAS1	growth arrest specific 1	165.328	-3.40405	1.30217e-57
ENSG00000070540	55062	WIPI1	WD repeat domain, phosphoinositide interacting 1	425.129	2.2359	1.68599e-57
ENSG00000132780	4678	NASP	nuclear autoantigenic sperm protein	2151.22	-1.11931	2.22458e-57
ENSG00000188486	3014	H2AFX	H2A histone family member X	2413.56	-2.06501	2.52366e-57
ENSG00000164754	5885	RAD21	RAD21 cohesin complex component	2933.98	-1.15811	2.70343e-57
ENSG00000064042	22998	LIMCH1	LIM and calponin homology domains 1	3482.86	-1.62385	4.10532e-57
ENSG00000003249	79007	DBNDD1	dysbindin domain containing 1	839.798	-1.94827	4.58751e-57
ENSG00000138448	3685	ITGAV	integrin subunit alpha V	4079.97	-1.04158	5.94219e-57
ENSG00000141458	4864	NPC1	NPC intracellular cholesterol transporter 1	654.734	1.77313	1.20182e-56
ENSG00000164692	1278	COL1A2	collagen type I alpha 2 chain	7767.05	-1.57662	1.2627e-56
ENSG00000077232	54431	DNAJC10	DnaJ heat shock protein family (Hsp40) member C10	2685.61	1.38019	1.92396e-56
ENSG00000134440	4677	NARS	asparaginyl-tRNA synthetase	1720.87	1.25692	3.03906e-56
ENSG00000013375	5238	PGM3	phosphoglucomutase 3	1491.74	1.53352	5.38808e-56
ENSG00000110080	6484	ST3GAL4	ST3 beta-galactoside alpha-2,3-sialyltransferase 4	1112.38	-1.8734	1.19064e-55
ENSG00000213853	2013	EMP2	epithelial membrane protein 2	332.762	-2.20488	1.24779e-55
ENSG00000026025	7431	VIM	vimentin	35324.8	-1.40271	1.26865e-55
ENSG00000135048	23670	TMEM2	transmembrane protein 2	1319.26	-1.80016	1.44598e-55
ENSG00000091490	23231	SEL1L3	SEL1L family member 3	1686.97	1.17678	1.48541e-55
ENSG00000167996	2495	FTH1	ferritin heavy chain 1	5710.16	1.9459	1.59626e-55
ENSG00000101670	9388	LIPG	lipase G, endothelial type	351.1	-2.01784	1.90837e-55
ENSG00000035403	7414	VCL	vinculin	4930.12	-1.15481	2.24133e-55
ENSG00000146411	154091	SLC2A12	solute carrier family 2 member 12	194.465	-4.05018	5.20705e-55
ENSG00000171992	11346	SYNPO	synaptopodin	679.521	-1.75434	7.68972e-55
ENSG00000150961	9871	SEC24D	SEC24 homolog D, COPII coat complex component	2220.36	1.45839	1.22242e-54
ENSG00000106278	5803	PTPRZ1	protein tyrosine phosphatase, receptor type Z1	151.582	-3.56128	1.26539e-54
ENSG00000145632	10769	PLK2	polo like kinase 2	1835.91	-1.29206	1.31953e-54
ENSG00000073111	4171	MCM2	minichromosome maintenance complex component 2	1351.82	-1.82352	1.34535e-54
ENSG00000029534	286	ANK1	ankyrin 1	284.204	-2.27559	1.46947e-54
ENSG00000050438	9498	SLC4A8	solute carrier family 4 member 8	451.735	-2.00611	1.53718e-54
ENSG00000115380	2202	EFEMP1	EGF containing fibulin like extracellular matrix protein 1	4675.64	-1.6699	1.93839e-54
ENSG00000008394	4257	MGST1	microsomal glutathione S-transferase 1	907.447	1.80347	1.98152e-54
ENSG00000171621	80176	SPSB1	splA/ryanodine receptor domain and SOCS box containing 1	368.967	2.01528	2.05677e-54
ENSG00000173812	10209	EIF1	eukaryotic translation initiation factor 1	9225.75	1.19059	2.22791e-54
ENSG00000119729	23433	RHOQ	ras homolog family member Q	862.917	1.33473	2.64577e-54
ENSG00000198830	3151	HMGN2	high mobility group nucleosomal binding domain 2	3550.05	-1.51973	3.70071e-54
ENSG00000151725	79682	CENPU	centromere protein U	493.002	-1.97443	3.76843e-54
ENSG00000131871	55829	SELENOS	selenoprotein S	1186.12	1.31155	4.19092e-54
ENSG00000081189	4208	MEF2C	myocyte enhancer factor 2C	775.724	-1.90357	4.32297e-54
ENSG00000234741	60674	GAS5	growth arrest specific 5 (non-protein coding)	1243.42	2.02978	4.76555e-54
ENSG00000113083	4015	LOX	lysyl oxidase	212.475	2.85862	7.36794e-54
ENSG00000165480	221150	SKA3	spindle and kinetochore associated complex subunit 3	443.519	-1.79693	8.80459e-54
ENSG00000163430	11167	FSTL1	follistatin like 1	2127.28	-1.25908	9.42774e-54
ENSG00000092853	63967	CLSPN	claspin	521.749	-1.7408	9.62257e-54
ENSG00000120833	8835	SOCS2	suppressor of cytokine signaling 2	933.079	-1.77034	1.27458e-53
ENSG00000163399	476	ATP1A1	ATPase Na+/K+ transporting subunit alpha 1	26088.6	-1.16546	1.44727e-53
ENSG00000024526	55635	DEPDC1	DEP domain containing 1	1185.46	-1.40222	1.6052e-53
ENSG00000111341	4256	MGP	matrix Gla protein	173.028	-5.2306	1.6052e-53
ENSG00000105519	828	CAPS	calcyphosine	7350.7	-3.13908	1.8933e-53
ENSG00000079616	3835	KIF22	kinesin family member 22	659.893	-1.933	2.4646e-53
ENSG00000117682	79947	DHDDS	dehydrodolichyl diphosphate synthase subunit	924.054	1.51472	3.12378e-53
ENSG00000123496	3598	IL13RA2	interleukin 13 receptor subunit alpha 2	1663.54	1.60295	3.5653e-53
ENSG00000079215	6507	SLC1A3	solute carrier family 1 member 3	1172.89	-1.42094	3.88701e-53
ENSG00000143479	8444	DYRK3	dual specificity tyrosine phosphorylation regulated kinase 3	293.719	2.44337	4.10758e-53
ENSG00000164597	10466	COG5	component of oligomeric golgi complex 5	987.196	1.7074	4.33566e-53
ENSG00000139514	6541	SLC7A1	solute carrier family 7 member 1	2815.33	1.39586	4.58985e-53
ENSG00000049541	5982	RFC2	replication factor C subunit 2	1067.29	-1.54072	4.89398e-53
ENSG00000138685	2247	FGF2	fibroblast growth factor 2	1494.27	1.43443	6.06865e-53
ENSG00000165029	19	ABCA1	ATP binding cassette subfamily A member 1	498.98	-1.88226	7.74832e-53
ENSG00000183856	128239	IQGAP3	IQ motif containing GTPase activating protein 3	1385.52	-1.38806	7.86027e-53
ENSG00000113739	8614	STC2	stanniocalcin 2	146.079	4.00199	9.83038e-53
ENSG00000106003	3955	LFNG	LFNG O-fucosylpeptide 3-beta-N-acetylglucosaminyltransferase	171.546	-3.22959	1.19609e-52
ENSG00000134352	3572	IL6ST	interleukin 6 signal transducer	3987.96	1.10673	1.60567e-52
ENSG00000165732	9188	DDX21	DExD-box helicase 21	4651.65	1.05204	1.87423e-52
ENSG00000196498	9612	NCOR2	nuclear receptor corepressor 2	3596.13	-1.11379	2.30772e-52
ENSG00000139291	55266	TMEM19	transmembrane protein 19	424.471	-1.70737	2.61747e-52
ENSG00000174371	9156	EXO1	exonuclease 1	358.369	-1.94525	3.35322e-52
ENSG00000197822	100506658	OCLN	occludin	139.819	3.68753	6.65728e-52
ENSG00000060982	586	BCAT1	branched chain amino acid transaminase 1	4784.82	1.4606	8.45456e-52
ENSG00000167522	29123	ANKRD11	ankyrin repeat domain 11	3717.41	1.2137	9.60414e-52
ENSG00000150625	2823	GPM6A	glycoprotein M6A	7731.2	-1.58143	1.36522e-51
ENSG00000004399	23129	PLXND1	plexin D1	2273.2	-1.74802	1.50468e-51
ENSG00000100526	1033	CDKN3	cyclin dependent kinase inhibitor 3	527.626	-1.72549	1.50468e-51
ENSG00000064309	50937	CDON	cell adhesion associated, oncogene regulated	1142.32	-1.6546	1.7849e-51
ENSG00000041353	5874	RAB27B	RAB27B, member RAS oncogene family	221.315	2.70567	1.9439e-51
ENSG00000182199	6472	SHMT2	serine hydroxymethyltransferase 2	2304.11	1.3909	2.32341e-51
ENSG00000172175	10892	MALT1	MALT1 paracaspase	810.817	-1.34819	2.33298e-51
ENSG00000162298	84447	SYVN1	synoviolin 1	727.62	1.61858	2.43748e-51
ENSG00000181449	6657	SOX2	SRY-box 2	2604	-1.59057	3.26554e-51
ENSG00000196754	6273	S100A2	S100 calcium binding protein A2	578.836	-2.11169	4.25642e-51
ENSG00000055483	57602	USP36	ubiquitin specific peptidase 36	1182.72	1.68857	5.22879e-51
ENSG00000143061	3321	IGSF3	immunoglobulin superfamily member 3	2543.71	-1.54527	5.27301e-51
ENSG00000055118	3757	KCNH2	potassium voltage-gated channel subfamily H member 2	225.906	-2.93413	9.52404e-51
ENSG00000168916	57507	ZNF608	zinc finger protein 608	686.293	-1.5289	1.17612e-50
ENSG00000186318	23621	BACE1	beta-secretase 1	1582.22	-1.25184	1.54741e-50
ENSG00000162733	4921	DDR2	discoidin domain receptor tyrosine kinase 2	1040.84	2.17109	1.5578e-50
ENSG00000196154	6275	S100A4	S100 calcium binding protein A4	273.67	-2.68754	1.56369e-50
ENSG00000092470	79968	WDR76	WD repeat domain 76	504.969	-1.7294	1.6573e-50
ENSG00000157851	56896	DPYSL5	dihydropyrimidinase like 5	420.163	-1.84921	2.39396e-50
ENSG00000171867	5621	PRNP	prion protein	6356.41	1.03188	2.72408e-50
ENSG00000161888	147841	SPC24	SPC24, NDC80 kinetochore complex component	402.24	-2.1655	2.77331e-50
ENSG00000145536	170690	ADAMTS16	ADAM metallopeptidase with thrombospondin type 1 motif 16	526.104	-2.2932	3.17227e-50
ENSG00000136986	79139	DERL1	derlin 1	1150.73	1.2378	3.25766e-50
ENSG00000128791	57045	TWSG1	twisted gastrulation BMP signaling modulator 1	1861.37	-1.03033	3.47769e-50
ENSG00000188522	644815	FAM83G	family with sequence similarity 83 member G	503.905	1.51376	3.59497e-50
ENSG00000136436	10241	CALCOCO2	calcium binding and coiled-coil domain 2	1419.13	1.15277	3.87393e-50
ENSG00000134291	79022	TMEM106C	transmembrane protein 106C	1216.22	-1.60628	4.2593e-50
ENSG00000123416	10376	TUBA1B	tubulin alpha 1b	3851.51	-1.62263	5.9256e-50
ENSG00000112715	7422	VEGFA	vascular endothelial growth factor A	2988.62	1.7675	7.95425e-50
ENSG00000145740	64924	SLC30A5	solute carrier family 30 member 5	1631.03	1.03211	8.02283e-50
ENSG00000138771	57619	SHROOM3	shroom family member 3	938.044	-1.747	1.15614e-49
ENSG00000165244	195828	ZNF367	zinc finger protein 367	286.969	-2.1795	1.21718e-49
ENSG00000112118	4172	MCM3	minichromosome maintenance complex component 3	2324.5	-1.43366	1.22035e-49
ENSG00000135476	9700	ESPL1	extra spindle pole bodies like 1, separase	435.612	-2.04962	1.22035e-49
ENSG00000143256	5202	PFDN2	prefoldin subunit 2	1277.47	1.58437	1.68872e-49
ENSG00000111665	83461	CDCA3	cell division cycle associated 3	349.977	-2.22405	2.10048e-49
ENSG00000136628	2058	EPRS	glutamyl-prolyl-tRNA synthetase	5307.5	1.3076	2.12043e-49
ENSG00000185361	126282	TNFAIP8L1	TNF alpha induced protein 8 like 1	347.987	-1.95077	2.57266e-49
ENSG00000172216	1051	CEBPB	CCAAT/enhancer binding protein beta	1029.17	1.85404	3.09792e-49
ENSG00000138660	55435	AP1AR	adaptor related protein complex 1 associated regulatory protein	437.478	1.90485	4.15844e-49
ENSG00000117519	1266	CNN3	calponin 3	7367.11	-1.40864	6.65518e-49
ENSG00000163235	7039	TGFA	transforming growth factor alpha	1156.71	-1.7117	6.65518e-49
ENSG00000175216	9793	CKAP5	cytoskeleton associated protein 5	4305.89	-1.04836	6.72026e-49
ENSG00000166949	4088	SMAD3	SMAD family member 3	1190.79	-1.2966	7.21846e-49
ENSG00000197063	4097	MAFG	MAF bZIP transcription factor G	1282.98	1.43485	7.81769e-49
ENSG00000109685	7468	NSD2	nuclear receptor binding SET domain protein 2	3862.23	-0.932188	7.88567e-49
ENSG00000105968	94239	H2AFV	H2A histone family member V	4261.8	-1.25861	8.28023e-49
ENSG00000077152	29089	UBE2T	ubiquitin conjugating enzyme E2 T	620.946	-1.80973	9.95256e-49
ENSG00000135842	116496	FAM129A	family with sequence similarity 129 member A	4818.11	1.34253	1.22674e-48
ENSG00000125430	9953	HS3ST3B1	heparan sulfate-glucosamine 3-sulfotransferase 3B1	983.636	-1.14223	1.64161e-48
ENSG00000167670	10036	CHAF1A	chromatin assembly factor 1 subunit A	801.662	-1.39078	2.0321e-48
ENSG00000166508	4176	MCM7	minichromosome maintenance complex component 7	2977.8	-1.24962	2.04627e-48
ENSG00000198363	444	ASPH	aspartate beta-hydroxylase	4546.35	1.36029	2.60215e-48
ENSG00000087586	6790	AURKA	aurora kinase A	1245.27	-1.89786	2.98358e-48
ENSG00000166483	7465	WEE1	WEE1 G2 checkpoint kinase	1046.68	-1.3706	4.84556e-48
ENSG00000136235	10457	GPNMB	glycoprotein nmb	1198.95	1.59407	4.87076e-48
ENSG00000104907	55621	TRMT1	tRNA methyltransferase 1	575.219	1.56732	6.46252e-48
ENSG00000197321	6840	SVIL	supervillin	1396.7	-1.32969	6.9928e-48
ENSG00000123473	6491	STIL	SCL/TAL1 interrupting locus	699.477	-1.50015	7.59078e-48
ENSG00000136153	4008	LMO7	LIM domain 7	404.271	-1.66878	1.03228e-47
ENSG00000120805	400	ARL1	ADP ribosylation factor like GTPase 1	1110.76	1.10827	1.04221e-47
ENSG00000118217	22926	ATF6	activating transcription factor 6	1696.35	1.14062	1.19685e-47
ENSG00000152402	2977	GUCY1A2	guanylate cyclase 1 soluble subunit alpha 2	900.014	-1.71651	1.22598e-47
ENSG00000060762	51660	MPC1	mitochondrial pyruvate carrier 1	921.632	1.41634	1.56609e-47
ENSG00000157800	84255	SLC37A3	solute carrier family 37 member 3	864	1.13786	1.67804e-47
ENSG00000166579	81565	NDEL1	nudE neurodevelopment protein 1 like 1	927.453	1.29399	1.79962e-47
ENSG00000176619	84823	LMNB2	lamin B2	3550.6	-1.33902	1.80072e-47
ENSG00000140332	7090	TLE3	transducin like enhancer of split 3	830.615	-1.53385	2.07044e-47
ENSG00000106636	10652	YKT6	YKT6 v-SNARE homolog	3923.03	0.959849	2.08819e-47
ENSG00000059804	6515	SLC2A3	solute carrier family 2 member 3	820.008	2.02929	2.64637e-47
ENSG00000130720	84929	FIBCD1	fibrinogen C domain containing 1	573.086	-2.19725	2.90253e-47
ENSG00000211459	4549	RNR1	s-rRNA	6221.39	1.35764	3.17993e-47
ENSG00000143476	51514	DTL	denticleless E3 ubiquitin protein ligase homolog	560.567	-1.73131	4.29039e-47
ENSG00000166833	89797	NAV2	neuron navigator 2	812.006	-1.57356	4.30036e-47
ENSG00000100162	79019	CENPM	centromere protein M	254.5	-2.16034	4.34753e-47
ENSG00000214717	9189	ZBED1	zinc finger BED-type containing 1	1313.43	-1.30224	4.56369e-47
ENSG00000127124	59269	HIVEP3	human immunodeficiency virus type I enhancer binding protein 3	860.021	-1.65714	4.71991e-47
ENSG00000137710	5962	RDX	radixin	4736.05	-0.930067	4.96992e-47
ENSG00000135540	57224	NHSL1	NHS like 1	617.647	1.47022	5.46061e-47
ENSG00000181852	10193	RNF41	ring finger protein 41	825.338	1.38285	5.65978e-47
ENSG00000074219	8463	TEAD2	TEA domain transcription factor 2	357.571	-1.98357	7.54205e-47
ENSG00000196526	60312	AFAP1	actin filament associated protein 1	2167.01	-1.28978	9.37148e-47
ENSG00000119969	3070	HELLS	helicase, lymphoid-specific	564.2	-1.82677	1.09654e-46
ENSG00000073008	5817	PVR	poliovirus receptor	2924.81	1.08851	1.42619e-46
ENSG00000185274	64409	WBSCR17	Williams-Beuren syndrome chromosome region 17	759.768	-2.30951	1.94998e-46
ENSG00000136997	4609	MYC	MYC proto-oncogene, bHLH transcription factor	1060.33	1.21441	2.91278e-46
ENSG00000175662	146691	TOM1L2	target of myb1 like 2 membrane trafficking protein	1559.3	-1.37674	2.94508e-46
ENSG00000078900	7161	TP73	tumor protein p73	246.439	-2.27542	3.24124e-46
ENSG00000143195	387597	ILDR2	immunoglobulin like domain containing receptor 2	571.227	-1.85519	3.33733e-46
ENSG00000113282	9685	CLINT1	clathrin interactor 1	2511.79	1.11108	3.60779e-46
ENSG00000165304	9833	MELK	maternal embryonic leucine zipper kinase	1324.2	-1.35686	5.20596e-46
ENSG00000165801	55701	ARHGEF40	Rho guanine nucleotide exchange factor 40	659.495	-1.4549	5.68749e-46
ENSG00000099875	2872	MKNK2	MAP kinase interacting serine/threonine kinase 2	1642.75	1.34603	6.36679e-46
ENSG00000165030	4783	NFIL3	nuclear factor, interleukin 3 regulated	289.803	2.11681	8.55064e-46
ENSG00000162496	9249	DHRS3	dehydrogenase/reductase 3	304.379	-2.5429	9.42541e-46
ENSG00000166173	55323	LARP6	La ribonucleoprotein domain family member 6	1020.65	1.68109	1.3074e-45
ENSG00000131242	84440	RAB11FIP4	RAB11 family interacting protein 4	346.554	-2.29294	2.08601e-45
ENSG00000118785	6696	SPP1	secreted phosphoprotein 1	5514.06	1.63241	2.2746e-45
ENSG00000170961	3037	HAS2	hyaluronan synthase 2	163.689	-3.55726	2.97698e-45
ENSG00000105486	3978	LIG1	DNA ligase 1	556.529	-1.62184	3.3291e-45
ENSG00000155158	158219	TTC39B	tetratricopeptide repeat domain 39B	423.615	1.58446	3.51453e-45
ENSG00000143878	388	RHOB	ras homolog family member B	1554.41	-1.32265	3.85473e-45
ENSG00000160307	6285	S100B	S100 calcium binding protein B	154.031	-3.47977	4.7012e-45
ENSG00000157657	114991	ZNF618	zinc finger protein 618	605.765	-1.56129	4.94479e-45
ENSG00000167552	7846	TUBA1A	tubulin alpha 1a	7878.69	-2.7836	5.6831e-45
ENSG00000121621	81930	KIF18A	kinesin family member 18A	492.695	-1.50273	6.00608e-45
ENSG00000124207	1434	CSE1L	chromosome segregation 1 like	3320.45	-1.09099	6.83828e-45
ENSG00000260920	NA	NA	NA	121.964	3.207	1.01441e-44
ENSG00000119771	114818	KLHL29	kelch like family member 29	223.373	2.44749	1.03572e-44
ENSG00000162645	2634	GBP2	guanylate binding protein 2	206.414	-2.20375	1.19998e-44
ENSG00000149554	1111	CHEK1	checkpoint kinase 1	1045.84	-1.22234	1.27508e-44
ENSG00000170004	1107	CHD3	chromodomain helicase DNA binding protein 3	3123.07	-1.10536	2.47735e-44
ENSG00000163347	9076	CLDN1	claudin 1	132.954	2.62251	2.60118e-44
ENSG00000105976	4233	MET	MET proto-oncogene, receptor tyrosine kinase	3912.57	1.57042	2.73171e-44
ENSG00000179562	79571	GCC1	GRIP and coiled-coil domain containing 1	762.992	1.44521	3.1941e-44
ENSG00000177426	7050	TGIF1	TGFB induced factor homeobox 1	821.708	1.46803	4.26271e-44
ENSG00000101849	6907	TBL1X	transducin beta like 1X-linked	548.928	1.36726	4.41707e-44
ENSG00000141198	10040	TOM1L1	target of myb1 like 1 membrane trafficking protein	606.572	1.3512	6.62666e-44
ENSG00000109917	8882	ZPR1	ZPR1 zinc finger	1120.54	1.10029	6.97746e-44
ENSG00000133816	9645	MICAL2	microtubule associated monooxygenase, calponin and LIM domain containing 2	1434.53	1.20411	7.65362e-44
ENSG00000099250	8829	NRP1	neuropilin 1	2566.95	1.37563	8.00525e-44
ENSG00000111247	10635	RAD51AP1	RAD51 associated protein 1	242.365	-2.05743	9.68078e-44
ENSG00000212719	339263	C17orf51	chromosome 17 open reading frame 51	322.805	2.33535	1.04223e-43
ENSG00000090020	6548	SLC9A1	solute carrier family 9 member A1	1008.06	1.24905	1.12525e-43
ENSG00000074935	51175	TUBE1	tubulin epsilon 1	371.352	2.35061	1.25116e-43
ENSG00000130402	81	ACTN4	actinin alpha 4	19128.7	-1.3326	1.56531e-43
ENSG00000181649	7262	PHLDA2	pleckstrin homology like domain family A member 2	414.772	2.1774	1.63334e-43
ENSG00000159479	112950	MED8	mediator complex subunit 8	713.604	1.52107	1.66438e-43
ENSG00000188610	653820	FAM72B	family with sequence similarity 72 member B	327.182	-1.75987	1.85903e-43
ENSG00000120875	1846	DUSP4	dual specificity phosphatase 4	311.838	2.39517	1.92399e-43
ENSG00000177951	51272	BET1L	Bet1 golgi vesicular membrane trafficking protein like	537.22	1.28242	1.94132e-43
ENSG00000262001	NA	NA	NA	195.005	2.24434	2.04142e-43
ENSG00000137460	85462	FHDC1	FH2 domain containing 1	154.429	-2.69836	2.18638e-43
ENSG00000136240	11014	KDELR2	KDEL endoplasmic reticulum protein retention receptor 2	8897.55	0.934379	2.52134e-43
ENSG00000072682	8974	P4HA2	prolyl 4-hydroxylase subunit alpha 2	1015.73	1.30896	2.60475e-43
ENSG00000064961	10362	HMG20B	high mobility group 20B	1087.14	-1.28464	3.00357e-43
ENSG00000164904	501	ALDH7A1	aldehyde dehydrogenase 7 family member A1	1279.63	-1.26665	3.56038e-43
ENSG00000136868	1317	SLC31A1	solute carrier family 31 member 1	1024.7	1.20925	3.8209e-43
ENSG00000150991	7316	UBC	ubiquitin C	8475.93	0.904496	4.05066e-43
ENSG00000188488	5104	SERPINA5	serpin family A member 5	121.518	-4.72295	4.77304e-43
ENSG00000206527	201562	HACD2	3-hydroxyacyl-CoA dehydratase 2	2724.04	-0.940295	5.32853e-43
ENSG00000182168	8633	UNC5C	unc-5 netrin receptor C	690.457	-1.57447	5.88289e-43
ENSG00000145675	5295	PIK3R1	phosphoinositide-3-kinase regulatory subunit 1	996.458	-1.3373	5.99306e-43
ENSG00000021826	1373	CPS1	carbamoyl-phosphate synthase 1	284.286	-1.82112	9.3208e-43
ENSG00000100883	6729	SRP54	signal recognition particle 54	1525.54	1.18294	9.3208e-43
ENSG00000276043	29128	UHRF1	ubiquitin like with PHD and ring finger domains 1	699.641	-1.85389	1.0487e-42
ENSG00000151612	152485	ZNF827	zinc finger protein 827	1000.33	-1.1702	1.19929e-42
ENSG00000153989	116150	NUS1	NUS1 dehydrodolichyl diphosphate synthase subunit	1166.29	1.17007	1.43203e-42
ENSG00000124098	116151	FAM210B	family with sequence similarity 210 member B	1469.56	-1.44774	1.7313e-42
ENSG00000067955	865	CBFB	core-binding factor beta subunit	1631.71	-0.97097	1.7971e-42
ENSG00000118418	9324	HMGN3	high mobility group nucleosomal binding domain 3	847.742	-1.43364	1.84724e-42
ENSG00000175130	65108	MARCKSL1	MARCKS like 1	1228.28	-1.86816	1.86794e-42
ENSG00000100242	25777	SUN2	Sad1 and UNC84 domain containing 2	953.842	-1.13093	1.92398e-42
ENSG00000164611	9232	PTTG1	pituitary tumor-transforming 1	1197.19	-1.81474	2.13299e-42
ENSG00000164199	84059	ADGRV1	adhesion G protein-coupled receptor V1	310.512	-2.12292	2.50815e-42
ENSG00000106829	7091	TLE4	transducin like enhancer of split 4	284.603	-1.98843	3.36805e-42
ENSG00000198682	9060	PAPSS2	3'-phosphoadenosine 5'-phosphosulfate synthase 2	206.529	1.96207	4.52361e-42
ENSG00000162636	284611	FAM102B	family with sequence similarity 102 member B	566.425	-1.36309	4.73947e-42
ENSG00000102024	5358	PLS3	plastin 3	6599.51	-0.860818	5.78674e-42
ENSG00000144468	84236	RHBDD1	rhomboid domain containing 1	353.398	1.53115	5.81632e-42
ENSG00000013588	9052	GPRC5A	G protein-coupled receptor class C group 5 member A	164.008	2.89259	5.9296e-42
ENSG00000111711	51026	GOLT1B	golgi transport 1B	1191.66	1.29653	6.05579e-42
ENSG00000197780	6884	TAF13	TATA-box binding protein associated factor 13	1086.48	1.44093	6.31245e-42
ENSG00000066455	9950	GOLGA5	golgin A5	930.427	1.15527	6.77294e-42
ENSG00000185697	4603	MYBL1	MYB proto-oncogene like 1	489.592	-1.42039	7.02061e-42
ENSG00000112379	57221	ARFGEF3	ARFGEF family member 3	1628.39	1.88897	7.04325e-42
ENSG00000246985	144481	SOCS2-AS1	SOCS2 antisense RNA 1	169.063	-2.34503	7.67786e-42
ENSG00000112029	26271	FBXO5	F-box protein 5	561.284	-1.52879	7.96634e-42
ENSG00000173848	10276	NET1	neuroepithelial cell transforming 1	928.066	-1.25086	9.66931e-42
ENSG00000153162	654	BMP6	bone morphogenetic protein 6	126.61	3.45769	1.57563e-41
ENSG00000069869	4734	NEDD4	neural precursor cell expressed, developmentally down-regulated 4, E3 ubiquitin protein ligase	1580.16	1.39052	2.06433e-41
ENSG00000070081	4925	NUCB2	nucleobindin 2	1018.84	1.3275	2.412e-41
ENSG00000120306	84418	CYSTM1	cysteine rich transmembrane module containing 1	531.942	1.56445	2.73466e-41
ENSG00000071242	6196	RPS6KA2	ribosomal protein S6 kinase A2	503.364	1.27897	2.79193e-41
ENSG00000102554	688	KLF5	Kruppel like factor 5	803.001	1.33618	2.92615e-41
ENSG00000108448	147166	TRIM16L	tripartite motif containing 16 like	397.465	1.48282	3.83339e-41
ENSG00000157216	23648	SSBP3	single stranded DNA binding protein 3	595.329	-1.32425	3.9185e-41
ENSG00000162695	148867	SLC30A7	solute carrier family 30 member 7	968.177	1.22401	4.02855e-41
ENSG00000109881	91057	CCDC34	coiled-coil domain containing 34	406.299	-1.5783	4.51512e-41
ENSG00000176974	6470	SHMT1	serine hydroxymethyltransferase 1	772.759	-1.39951	5.05812e-41
ENSG00000132382	10514	MYBBP1A	MYB binding protein 1a	1770.28	1.01725	5.37521e-41
ENSG00000129083	1315	COPB1	coatomer protein complex subunit beta 1	2807.74	0.955821	5.72351e-41
ENSG00000138496	83666	PARP9	poly(ADP-ribose) polymerase family member 9	377.916	-1.55338	5.92244e-41
ENSG00000147852	7436	VLDLR	very low density lipoprotein receptor	3772.83	-0.859813	6.46105e-41
ENSG00000057704	57458	TMCC3	transmembrane and coiled-coil domain family 3	97.0043	3.83813	6.66804e-41
ENSG00000074416	11343	MGLL	monoglyceride lipase	291.432	2.05659	7.14314e-41
ENSG00000172375	9854	C2CD2L	C2CD2 like	415.147	1.58927	7.73814e-41
ENSG00000173210	22885	ABLIM3	actin binding LIM protein family member 3	358.945	1.77243	8.69565e-41
ENSG00000231074	NA	NA	NA	573.869	1.70405	1.1595e-40
ENSG00000188229	10383	TUBB4B	tubulin beta 4B class IVb	4120.61	-1.21621	1.24673e-40
ENSG00000178607	2081	ERN1	endoplasmic reticulum to nucleus signaling 1	260.36	2.18575	1.44505e-40
ENSG00000065882	23216	TBC1D1	TBC1 domain family member 1	1716.69	-1.05539	1.67599e-40
ENSG00000145817	81555	YIPF5	Yip1 domain family member 5	1387.24	1.13805	1.78441e-40
ENSG00000139318	1848	DUSP6	dual specificity phosphatase 6	319.354	1.81524	1.86682e-40
ENSG00000132383	6117	RPA1	replication protein A1	2526.71	-1.38179	2.0177e-40
ENSG00000179820	91663	MYADM	myeloid associated differentiation marker	1553.93	1.43334	2.36227e-40
ENSG00000112972	3157	HMGCS1	3-hydroxy-3-methylglutaryl-CoA synthase 1	1187.27	-1.09496	2.80149e-40
ENSG00000182010	219790	RTKN2	rhotekin 2	306.491	-1.76582	2.83192e-40
ENSG00000145623	9180	OSMR	oncostatin M receptor	1443.36	1.29493	3.58623e-40
ENSG00000168003	6520	SLC3A2	solute carrier family 3 member 2	9475.02	2.60985	3.87801e-40
ENSG00000135451	10024	TROAP	trophinin associated protein	430.576	-1.75502	3.99079e-40
ENSG00000158710	8407	TAGLN2	transgelin 2	12016.7	-1.44384	4.17753e-40
ENSG00000076003	4175	MCM6	minichromosome maintenance complex component 6	1106.44	-1.13119	4.26202e-40
ENSG00000129038	4016	LOXL1	lysyl oxidase like 1	936.85	-1.91458	4.48581e-40
ENSG00000099783	4670	HNRNPM	heterogeneous nuclear ribonucleoprotein M	4861.78	-0.827412	5.08503e-40
ENSG00000125977	8894	EIF2S2	eukaryotic translation initiation factor 2 subunit beta	2222.38	1.22809	5.09073e-40
ENSG00000112308	81688	C6orf62	chromosome 6 open reading frame 62	5746.11	0.849164	5.26092e-40
ENSG00000178105	1662	DDX10	DEAD-box helicase 10	1093.22	1.34613	5.66592e-40
ENSG00000165072	256691	MAMDC2	MAM domain containing 2	228.601	-2.09569	7.55696e-40
ENSG00000101199	55738	ARFGAP1	ADP ribosylation factor GTPase activating protein 1	1681.69	1.4292	8.13266e-40
ENSG00000184205	64061	TSPYL2	TSPY like 2	395.273	1.9423	9.66434e-40
ENSG00000160285	4047	LSS	lanosterol synthase	2515.91	-0.9473	1.07515e-39
ENSG00000140105	7453	WARS	tryptophanyl-tRNA synthetase	2089.39	2.65295	1.0785e-39
ENSG00000103449	6299	SALL1	spalt like transcription factor 1	773.457	-1.15874	1.34648e-39
ENSG00000114850	6747	SSR3	signal sequence receptor subunit 3	2720.81	0.971737	1.50889e-39
ENSG00000167110	2801	GOLGA2	golgin A2	1450.8	1.01878	1.65666e-39
ENSG00000157020	6396	SEC13	SEC13 homolog, nuclear pore and COPII coat complex component	3593.84	0.957051	1.77183e-39
ENSG00000136826	9314	KLF4	Kruppel like factor 4	143.675	2.80323	1.86576e-39
ENSG00000155304	6782	HSPA13	heat shock protein family A (Hsp70) member 13	1686.09	1.26701	1.86576e-39
ENSG00000197256	25959	KANK2	KN motif and ankyrin repeat domains 2	907.001	-1.44238	2.13514e-39
ENSG00000169129	84632	AFAP1L2	actin filament associated protein 1 like 2	116.913	-4.10038	2.21804e-39
ENSG00000101868	5422	POLA1	DNA polymerase alpha 1, catalytic subunit	975.82	-1.22348	2.50179e-39
ENSG00000004777	115703	ARHGAP33	Rho GTPase activating protein 33	299.438	-1.93227	2.53608e-39
ENSG00000147905	84186	ZCCHC7	zinc finger CCHC-type containing 7	337.899	1.67489	3.27391e-39
ENSG00000185269	147111	NOTUM	NOTUM, palmitoleoyl-protein carboxylesterase	108.182	-4.25309	3.3096e-39
ENSG00000108829	55379	LRRC59	leucine rich repeat containing 59	4964.85	0.818517	3.47644e-39
ENSG00000187957	92737	DNER	delta/notch like EGF repeat containing	951.648	1.42855	3.74983e-39
ENSG00000114473	84223	IQCG	IQ motif containing G	797.214	1.44146	3.8848e-39
ENSG00000171119	4902	NRTN	neurturin	220.674	-2.21841	4.00601e-39
ENSG00000115295	79745	CLIP4	CAP-Gly domain containing linker protein family member 4	1490.31	1.43327	4.02765e-39
ENSG00000102935	23090	ZNF423	zinc finger protein 423	118.537	-2.86322	6.33444e-39
ENSG00000136205	64759	TNS3	tensin 3	2597.21	-1.10068	6.74338e-39
ENSG00000164951	54704	PDP1	pyruvate dehyrogenase phosphatase catalytic subunit 1	2174.77	0.890948	8.87346e-39
ENSG00000204217	659	BMPR2	bone morphogenetic protein receptor type 2	975.128	-1.07123	9.40672e-39
ENSG00000177565	79718	TBL1XR1	transducin beta like 1 X-linked receptor 1	2040.87	-1.1766	1.12307e-38
ENSG00000129534	55320	MIS18BP1	MIS18 binding protein 1	392.064	-1.44812	1.12748e-38
ENSG00000182580	2049	EPHB3	EPH receptor B3	156.01	-2.56096	1.131e-38
ENSG00000118257	8828	NRP2	neuropilin 2	7760.18	-1.02364	1.15997e-38
ENSG00000137414	51439	FAM8A1	family with sequence similarity 8 member A1	1019.88	1.02848	1.21815e-38
ENSG00000105321	26093	CCDC9	coiled-coil domain containing 9	344.558	1.68908	1.65999e-38
ENSG00000152409	133746	JMY	junction mediating and regulatory protein, p53 cofactor	1134.48	1.69397	1.68545e-38
ENSG00000148180	2934	GSN	gelsolin	752.607	-1.56095	1.77176e-38
ENSG00000170290	6588	SLN	sarcolipin	166.971	-6.79963	1.89935e-38
ENSG00000132274	10346	TRIM22	tripartite motif containing 22	187.649	-2.28698	2.15436e-38
ENSG00000134109	9695	EDEM1	ER degradation enhancing alpha-mannosidase like protein 1	2325.73	1.00831	2.17053e-38
ENSG00000105722	2077	ERF	ETS2 repressor factor	1395.81	-1.20789	2.29352e-38
ENSG00000129173	79733	E2F8	E2F transcription factor 8	139.628	-2.88587	2.57221e-38
ENSG00000111962	10090	UST	uronyl 2-sulfotransferase	466.172	1.39473	2.61814e-38
ENSG00000042286	84883	AIFM2	apoptosis inducing factor, mitochondria associated 2	916.225	1.07094	2.7337e-38
ENSG00000168496	2237	FEN1	flap structure-specific endonuclease 1	1007.72	-1.44691	2.91429e-38
ENSG00000111145	2004	ELK3	ELK3, ETS transcription factor	1405.13	-0.923609	3.3525e-38
ENSG00000164442	10370	CITED2	Cbp/p300 interacting transactivator with Glu/Asp rich carboxy-terminal domain 2	1025.92	1.21604	3.53355e-38
ENSG00000169862	1501	CTNND2	catenin delta 2	435.167	-1.78689	3.63419e-38
ENSG00000109065	26151	NAT9	N-acetyltransferase 9 (putative)	499.512	1.53813	4.0401e-38
ENSG00000182831	29035	C16orf72	chromosome 16 open reading frame 72	1362.37	1.12458	4.24666e-38
ENSG00000158402	995	CDC25C	cell division cycle 25C	249.575	-2.19574	4.45973e-38
ENSG00000077150	4791	NFKB2	nuclear factor kappa B subunit 2	523.783	1.4117	4.54176e-38
ENSG00000114388	10641	NPRL2	NPR2-like, GATOR1 complex subunit	435.991	1.56365	5.07403e-38
ENSG00000120278	57480	PLEKHG1	pleckstrin homology and RhoGEF domain containing G1	3149.92	-1.12492	5.11107e-38
ENSG00000109458	2549	GAB1	GRB2 associated binding protein 1	413.381	-1.4858	5.20467e-38
ENSG00000166689	144100	PLEKHA7	pleckstrin homology domain containing A7	246.718	-1.97479	5.478e-38
ENSG00000136052	84102	SLC41A2	solute carrier family 41 member 2	361.546	1.64782	5.51285e-38
ENSG00000112144	22858	ICK	intestinal cell kinase	820.521	-1.14878	5.56202e-38
ENSG00000111602	8914	TIMELESS	timeless circadian clock	863.008	-1.47497	5.71363e-38
ENSG00000165678	27069	GHITM	growth hormone inducible transmembrane protein	5430.25	0.865242	6.85553e-38
ENSG00000153071	1601	DAB2	DAB2, clathrin adaptor protein	653.802	1.68589	6.9569e-38
ENSG00000138413	3417	IDH1	isocitrate dehydrogenase (NADP(+)) 1, cytosolic	1905.15	1.00007	8.91378e-38
ENSG00000111445	5985	RFC5	replication factor C subunit 5	458.782	-1.41534	1.08421e-37
ENSG00000147535	84513	PLPP5	phospholipid phosphatase 5	315.752	2.12664	1.32769e-37
ENSG00000154305	375056	MIA3	MIA family member 3, ER export factor	1329.5	1.51374	1.36077e-37
ENSG00000150593	27250	PDCD4	programmed cell death 4	502.868	1.38217	1.41466e-37
ENSG00000121440	23024	PDZRN3	PDZ domain containing ring finger 3	263.237	-2.03604	1.58796e-37
ENSG00000155111	23097	CDK19	cyclin dependent kinase 19	990.861	-0.999506	1.74194e-37
ENSG00000111674	2026	ENO2	enolase 2	1082.01	1.24497	1.83973e-37
ENSG00000163171	10602	CDC42EP3	CDC42 effector protein 3	4238.33	-0.816634	1.91805e-37
ENSG00000125812	64412	GZF1	GDNF inducible zinc finger protein 1	463.695	1.34306	2.01722e-37
ENSG00000100714	4522	MTHFD1	methylenetetrahydrofolate dehydrogenase, cyclohydrolase and formyltetrahydrofolate synthetase 1	1460.78	-0.962261	2.24833e-37
ENSG00000240476	NA	NA	NA	266.493	2.24634	2.45288e-37
ENSG00000137876	51187	RSL24D1	ribosomal L24 domain containing 1	1476.73	1.2507	2.53612e-37
ENSG00000244509	27350	APOBEC3C	apolipoprotein B mRNA editing enzyme catalytic subunit 3C	1000.96	-1.58799	2.73664e-37
ENSG00000090013	645	BLVRB	biliverdin reductase B	1000.23	1.39375	3.15185e-37
ENSG00000179981	10194	TSHZ1	teashirt zinc finger homeobox 1	275.82	-1.74204	3.46645e-37
ENSG00000126351	7067	THRA	thyroid hormone receptor, alpha	522.356	-1.29425	3.52323e-37
ENSG00000136010	160428	ALDH1L2	aldehyde dehydrogenase 1 family member L2	116.846	3.14461	3.69337e-37
ENSG00000064393	28996	HIPK2	homeodomain interacting protein kinase 2	4954.16	-1.30095	3.70898e-37
ENSG00000068001	8692	HYAL2	hyaluronoglucosaminidase 2	470.093	-1.87496	4.62696e-37
ENSG00000134910	3703	STT3A	STT3A, catalytic subunit of the oligosaccharyltransferase complex	5946.96	0.734901	4.89565e-37
ENSG00000130741	1968	EIF2S3	eukaryotic translation initiation factor 2 subunit gamma	2786.78	0.894662	5.16105e-37
ENSG00000198561	1500	CTNND1	catenin delta 1	2201.07	-0.929561	5.25237e-37
ENSG00000120708	7045	TGFBI	transforming growth factor beta induced	8993.12	-1.305	6.62886e-37
ENSG00000103034	65009	NDRG4	NDRG family member 4	552.284	-1.38162	6.78943e-37
ENSG00000151468	83643	CCDC3	coiled-coil domain containing 3	166.258	-2.80059	7.0139e-37
ENSG00000204381	143903	LAYN	layilin	1306.93	-1.09493	7.31146e-37
ENSG00000138193	51196	PLCE1	phospholipase C epsilon 1	602.939	-1.37257	8.05373e-37
ENSG00000265763	118738	ZNF488	zinc finger protein 488	114.062	-5.21866	8.25867e-37
ENSG00000181789	22820	COPG1	coatomer protein complex subunit gamma 1	3254.95	0.836804	8.4998e-37
ENSG00000179889	23042	PDXDC1	pyridoxal dependent decarboxylase domain containing 1	1534.41	0.901927	1.0232e-36
ENSG00000122861	5328	PLAU	plasminogen activator, urokinase	943.114	-1.63222	1.32883e-36
ENSG00000075426	2355	FOSL2	FOS like 2, AP-1 transcription factor subunit	3304.55	-0.974825	1.34434e-36
ENSG00000147649	92140	MTDH	metadherin	3806.75	0.814912	1.41559e-36
ENSG00000160298	54058	C21orf58	chromosome 21 open reading frame 58	282.976	-1.69087	1.60109e-36
ENSG00000111328	8099	CDK2AP1	cyclin dependent kinase 2 associated protein 1	1487.14	-1.41708	1.7393e-36
ENSG00000166444	6764	ST5	suppression of tumorigenicity 5	543.377	-1.48904	2.23464e-36
ENSG00000152661	2697	GJA1	gap junction protein alpha 1	2486.55	-1.03538	2.7373e-36
ENSG00000147274	27316	RBMX	RNA binding motif protein, X-linked	2614.09	-0.799443	2.77652e-36
ENSG00000158859	9507	ADAMTS4	ADAM metallopeptidase with thrombospondin type 1 motif 4	131.118	-2.75159	2.81348e-36
ENSG00000101266	1457	CSNK2A1	casein kinase 2 alpha 1	2097.63	0.907446	2.94651e-36
ENSG00000227082	NA	NA	NA	101.781	-3.19892	3.54915e-36
ENSG00000057019	131566	DCBLD2	discoidin, CUB and LCCL domain containing 2	17173.3	0.955259	4.24227e-36
ENSG00000109255	10874	NMU	neuromedin U	236.656	-2.22632	4.37795e-36
ENSG00000134308	10971	YWHAQ	tyrosine 3-monooxygenase/tryptophan 5-monooxygenase activation protein theta	9628.09	-1.02278	4.40669e-36
ENSG00000197498	84154	RPF2	ribosome production factor 2 homolog	849.602	1.11527	4.45265e-36
ENSG00000180891	404093	CUEDC1	CUE domain containing 1	1631.2	-1.16323	4.91857e-36
ENSG00000186866	23275	POFUT2	protein O-fucosyltransferase 2	696.652	1.21885	5.05889e-36
ENSG00000182827	64746	ACBD3	acyl-CoA binding domain containing 3	1340.4	1.00336	5.26047e-36
ENSG00000166685	9382	COG1	component of oligomeric golgi complex 1	529.578	1.4134	5.81005e-36
ENSG00000112033	5467	PPARD	peroxisome proliferator activated receptor delta	1437.33	-1.06807	5.9872e-36
ENSG00000163938	26354	GNL3	G protein nucleolar 3	1795.21	1.00388	6.13448e-36
ENSG00000111912	135112	NCOA7	nuclear receptor coactivator 7	618.966	1.42419	6.17582e-36
ENSG00000128567	5420	PODXL	podocalyxin like	731.49	-1.3117	6.29016e-36
ENSG00000173894	84733	CBX2	chromobox 2	337.7	-1.59127	6.742e-36
ENSG00000090615	2802	GOLGA3	golgin A3	2367.9	1.31102	7.77737e-36
ENSG00000198223	1438	CSF2RA	colony stimulating factor 2 receptor alpha subunit	79.7709	3.27543	8.82781e-36
ENSG00000131095	2670	GFAP	glial fibrillary acidic protein	110.601	-3.2633	8.86656e-36
ENSG00000118707	60436	TGIF2	TGFB induced factor homeobox 2	370.114	-1.72686	9.65556e-36
ENSG00000176142	55254	TMEM39A	transmembrane protein 39A	516.004	1.34316	1.02351e-35
ENSG00000130766	83667	SESN2	sestrin 2	764.837	3.63972	1.43807e-35
ENSG00000147536	84296	GINS4	GINS complex subunit 4	376.359	-1.62606	1.50269e-35
ENSG00000078269	8871	SYNJ2	synaptojanin 2	1905.01	-0.877446	1.5135e-35
ENSG00000170485	4862	NPAS2	neuronal PAS domain protein 2	113.32	2.90849	1.68164e-35
ENSG00000115919	8942	KYNU	kynureninase	366.604	1.6688	2.02273e-35
ENSG00000281649	100506710	EBLN3P	endogenous Bornavirus-like nucleoprotein 3, pseudogene	1571.88	1.18183	2.05652e-35
ENSG00000117475	8548	BLZF1	basic leucine zipper nuclear factor 1	683.729	1.31379	2.15161e-35
ENSG00000118985	22936	ELL2	elongation factor for RNA polymerase II 2	1866.99	1.03718	2.33814e-35
ENSG00000159388	7832	BTG2	BTG anti-proliferation factor 2	248.702	-2.55935	2.75276e-35
ENSG00000133739	85444	LRRCC1	leucine rich repeat and coiled-coil centrosomal protein 1	355.087	-1.69923	2.81602e-35
ENSG00000153113	831	CAST	calpastatin	5342.22	-0.696856	2.96613e-35
ENSG00000067064	3422	IDI1	isopentenyl-diphosphate delta isomerase 1	791.375	-1.11245	3.33213e-35
ENSG00000108468	10951	CBX1	chromobox 1	2062.21	-1.13742	3.80015e-35
ENSG00000105281	6510	SLC1A5	solute carrier family 1 member 5	6442.96	2.24588	4.10094e-35
ENSG00000152049	23704	KCNE4	potassium voltage-gated channel subfamily E regulatory subunit 4	351.321	1.66279	4.11022e-35
ENSG00000125885	84515	MCM8	minichromosome maintenance 8 homologous recombination repair factor	737.532	-1.35284	4.25131e-35
ENSG00000196230	203068	TUBB	tubulin beta class I	22733.7	-1.13067	4.30501e-35
ENSG00000113742	80315	CPEB4	cytoplasmic polyadenylation element binding protein 4	851.435	1.71712	4.42511e-35
ENSG00000117318	3399	ID3	inhibitor of DNA binding 3, HLH protein	3294.96	-2.5969	5.24474e-35
ENSG00000079462	5050	PAFAH1B3	platelet activating factor acetylhydrolase 1b catalytic subunit 3	653.658	-1.62208	5.6688e-35
ENSG00000174851	10897	YIF1A	Yip1 interacting factor homolog A, membrane trafficking protein	939.423	1.38463	5.70319e-35
ENSG00000139641	23344	ESYT1	extended synaptotagmin 1	1305.96	0.989565	5.96771e-35
ENSG00000143641	2590	GALNT2	polypeptide N-acetylgalactosaminyltransferase 2	1886.66	-1.28469	6.12399e-35
ENSG00000012048	672	BRCA1	BRCA1, DNA repair associated	760.498	-1.30768	6.36322e-35
ENSG00000115419	2744	GLS	glutaminase	2007.78	-0.946584	6.85036e-35
ENSG00000198478	83699	SH3BGRL2	SH3 domain binding glutamate rich protein like 2	295.353	1.73127	8.5346e-35
ENSG00000185760	56479	KCNQ5	potassium voltage-gated channel subfamily Q member 5	218.015	2.19724	9.29237e-35
ENSG00000127564	9088	PKMYT1	protein kinase, membrane associated tyrosine/threonine 1	306.827	-2.10716	1.00851e-34
ENSG00000100029	23481	PES1	pescadillo ribosomal biogenesis factor 1	635.518	1.0812	1.0638e-34
ENSG00000102409	56271	BEX4	brain expressed X-linked 4	175.064	2.11617	1.18833e-34
ENSG00000115363	84141	EVA1A	eva-1 homolog A, regulator of programmed cell death	483.037	-1.61429	1.26801e-34
ENSG00000169992	57555	NLGN2	neuroligin 2	630.034	-1.14724	1.39955e-34
ENSG00000102038	6594	SMARCA1	SWI/SNF related, matrix associated, actin dependent regulator of chromatin, subfamily a, member 1	1717.53	-0.891263	1.48177e-34
ENSG00000095637	10580	SORBS1	sorbin and SH3 domain containing 1	212.247	-1.85911	1.54285e-34
ENSG00000128595	813	CALU	calumenin	16095.5	0.779968	1.58376e-34
ENSG00000133103	57511	COG6	component of oligomeric golgi complex 6	685.59	1.34954	1.6368e-34
ENSG00000107816	84445	LZTS2	leucine zipper tumor suppressor 2	794.433	-1.09715	1.70878e-34
ENSG00000151718	80014	WWC2	WW and C2 domain containing 2	1921.27	-1.05721	2.02493e-34
ENSG00000127870	6049	RNF6	ring finger protein 6	977.495	1.01224	2.08297e-34
ENSG00000171552	598	BCL2L1	BCL2 like 1	1069.63	1.07453	2.27317e-34
ENSG00000114805	23007	PLCH1	phospholipase C eta 1	145.37	-2.61056	2.4143e-34
ENSG00000051108	9709	HERPUD1	homocysteine inducible ER protein with ubiquitin like domain 1	3909.91	3.58182	3.08083e-34
ENSG00000100528	10175	CNIH1	cornichon family AMPA receptor auxiliary protein 1	1658.54	0.957682	3.17935e-34
ENSG00000185551	7026	NR2F2	nuclear receptor subfamily 2 group F member 2	810.397	-1.06551	3.58038e-34
ENSG00000100427	23209	MLC1	megalencephalic leukoencephalopathy with subcortical cysts 1	181.091	-2.40928	3.8182e-34
ENSG00000140534	90381	TICRR	TOPBP1 interacting checkpoint and replication regulator	408.451	-1.48714	3.9263e-34
ENSG00000143842	9580	SOX13	SRY-box 13	721.11	-1.10512	4.16933e-34
ENSG00000151503	23310	NCAPD3	non-SMC condensin II complex subunit D3	1223.49	-1.1662	4.20534e-34
ENSG00000186469	54331	GNG2	G protein subunit gamma 2	217.258	-1.8602	4.23635e-34
ENSG00000136160	1910	EDNRB	endothelin receptor type B	78.1021	-4.04817	4.86222e-34
ENSG00000172269	1798	DPAGT1	dolichyl-phosphate N-acetylglucosaminephosphotransferase 1	976.042	1.06893	5.30118e-34
ENSG00000127022	821	CANX	calnexin	22481.8	0.80276	5.56438e-34
ENSG00000213699	54978	SLC35F6	solute carrier family 35 member F6	1246.74	0.999671	5.56438e-34
ENSG00000133687	83857	TMTC1	transmembrane and tetratricopeptide repeat containing 1	447.799	1.45515	6.08365e-34
ENSG00000183853	55243	KIRREL	kin of IRRE like (Drosophila)	3031.93	-0.960529	6.61385e-34
ENSG00000140262	6938	TCF12	transcription factor 12	2642.89	-0.868229	6.74525e-34
ENSG00000156508	1915	EEF1A1	eukaryotic translation elongation factor 1 alpha 1	44912.2	0.743581	6.85055e-34
ENSG00000166801	63901	FAM111A	family with sequence similarity 111 member A	596.941	-1.42549	7.3582e-34
ENSG00000105835	10135	NAMPT	nicotinamide phosphoribosyltransferase	1905.73	2.45024	7.97124e-34
ENSG00000110400	5818	NECTIN1	nectin cell adhesion molecule 1	1042.5	-1.18075	8.1909e-34
ENSG00000139644	7009	TMBIM6	transmembrane BAX inhibitor motif containing 6	8496.49	0.744435	8.43361e-34
ENSG00000149948	8091	HMGA2	high mobility group AT-hook 2	439.776	1.42792	9.33793e-34
ENSG00000153044	64946	CENPH	centromere protein H	585.795	-1.52423	1.00091e-33
ENSG00000167962	90850	ZNF598	zinc finger protein 598	690.463	1.20934	1.01234e-33
ENSG00000107651	11196	SEC23IP	SEC23 interacting protein	1810.9	0.949815	1.04637e-33
ENSG00000152683	55676	SLC30A6	solute carrier family 30 member 6	974.756	1.03141	1.17431e-33
ENSG00000173801	3728	JUP	junction plakoglobin	578.753	-1.70977	1.28131e-33
ENSG00000168685	3575	IL7R	interleukin 7 receptor	989.485	-1.10569	1.63651e-33
ENSG00000119333	89891	WDR34	WD repeat domain 34	1074.1	-1.23372	1.75513e-33
ENSG00000148841	85450	ITPRIP	inositol 1,4,5-trisphosphate receptor interacting protein	531.567	1.23547	1.76908e-33
ENSG00000117461	8503	PIK3R3	phosphoinositide-3-kinase regulatory subunit 3	267.5	-1.81062	1.89599e-33
ENSG00000171658	344887	NMRAL2P	NmrA like redox sensor 2, pseudogene	77.1269	4.62977	1.93257e-33
ENSG00000128272	468	ATF4	activating transcription factor 4	3439.28	2.4471	2.08035e-33
ENSG00000170989	1901	S1PR1	sphingosine-1-phosphate receptor 1	97.3733	2.70988	2.13108e-33
ENSG00000110660	54733	SLC35F2	solute carrier family 35 member F2	1804.41	-0.933864	2.2385e-33
ENSG00000153885	79047	KCTD15	potassium channel tetramerization domain containing 15	368.223	1.39473	2.31431e-33
ENSG00000185650	677	ZFP36L1	ZFP36 ring finger protein like 1	2362.63	-0.903708	2.40455e-33
ENSG00000164284	134266	GRPEL2	GrpE like 2, mitochondrial	650.55	1.26416	2.69413e-33
ENSG00000168056	4054	LTBP3	latent transforming growth factor beta binding protein 3	820.529	-1.53399	2.86827e-33
ENSG00000109084	27346	TMEM97	transmembrane protein 97	648.971	-1.6233	3.21368e-33
ENSG00000169683	201255	LRRC45	leucine rich repeat containing 45	339.144	-1.72393	3.36556e-33
ENSG00000139083	2120	ETV6	ETS variant 6	547.705	-1.17712	3.70313e-33
ENSG00000232956	285958	SNHG15	small nucleolar RNA host gene 15	263.32	1.57235	3.83647e-33
ENSG00000119899	26503	SLC17A5	solute carrier family 17 member 5	416.892	1.23803	4.05235e-33
ENSG00000166197	9221	NOLC1	nucleolar and coiled-body phosphoprotein 1	2327.97	0.928031	5.23021e-33
ENSG00000124762	1026	CDKN1A	cyclin dependent kinase inhibitor 1A	1152.1	1.07821	5.27911e-33
ENSG00000204619	6992	PPP1R11	protein phosphatase 1 regulatory inhibitor subunit 11	940.305	1.02465	5.60451e-33
ENSG00000082641	4779	NFE2L1	nuclear factor, erythroid 2 like 1	4672.32	0.712842	5.6682e-33
ENSG00000196998	11152	WDR45	WD repeat domain 45	691.613	1.06399	5.81075e-33
ENSG00000124571	57510	XPO5	exportin 5	1440.26	1.01161	6.07054e-33
ENSG00000108960	23531	MMD	monocyte to macrophage differentiation associated	430.863	-1.45799	6.99173e-33
ENSG00000120705	2107	ETF1	eukaryotic translation termination factor 1	3970.03	0.781179	7.67676e-33
ENSG00000174780	6731	SRP72	signal recognition particle 72	5169.47	0.824575	8.04047e-33
ENSG00000106089	6804	STX1A	syntaxin 1A	219.071	1.73396	8.082e-33
ENSG00000138678	84803	GPAT3	glycerol-3-phosphate acyltransferase 3	454.414	1.34465	8.50503e-33
ENSG00000087301	57544	TXNDC16	thioredoxin domain containing 16	179.884	-1.93524	9.52566e-33
ENSG00000164220	2151	F2RL2	coagulation factor II thrombin receptor like 2	75.6567	3.90863	9.87395e-33
ENSG00000173456	79102	RNF26	ring finger protein 26	763.583	-1.13605	9.95434e-33
ENSG00000156299	7074	TIAM1	T-cell lymphoma invasion and metastasis 1	239.594	-1.73237	1.05966e-32
ENSG00000184432	9276	COPB2	coatomer protein complex subunit beta 2	3826.4	0.721187	1.06161e-32
ENSG00000152495	814	CAMK4	calcium/calmodulin dependent protein kinase IV	359.18	-1.36446	1.12123e-32
ENSG00000168411	55159	RFWD3	ring finger and WD repeat domain 3	1030.44	-1.03329	1.12324e-32
ENSG00000187498	1282	COL4A1	collagen type IV alpha 1 chain	1731.06	-1.1317	1.20267e-32
ENSG00000110427	25758	KIAA1549L	KIAA1549 like	466.385	-1.27559	1.26763e-32
ENSG00000163565	3428	IFI16	interferon gamma inducible protein 16	2540.61	0.87406	1.44661e-32
ENSG00000100889	5106	PCK2	phosphoenolpyruvate carboxykinase 2, mitochondrial	693.353	3.12875	1.48069e-32
ENSG00000101224	994	CDC25B	cell division cycle 25B	2116.32	-1.15246	1.56918e-32
ENSG00000147140	4841	NONO	non-POU domain containing, octamer-binding	7301.85	-0.749662	1.65366e-32
ENSG00000168495	661	POLR3D	RNA polymerase III subunit D	588.825	1.1976	1.74256e-32
ENSG00000006634	10926	DBF4	DBF4 zinc finger	589.972	-1.18079	1.86141e-32
ENSG00000148700	120	ADD3	adducin 3	633.578	-1.10601	1.91872e-32
ENSG00000198814	2710	GK	glycerol kinase	203.666	1.99999	1.94608e-32
ENSG00000138768	8615	USO1	USO1 vesicle transport factor	3877.16	1.00496	1.98988e-32
ENSG00000072062	5566	PRKACA	protein kinase cAMP-activated catalytic subunit alpha	1719.74	-0.869703	2.10582e-32
ENSG00000072501	8243	SMC1A	structural maintenance of chromosomes 1A	3123.78	-0.94016	2.26331e-32
ENSG00000203883	54345	SOX18	SRY-box 18	105.007	-3.05524	2.30909e-32
ENSG00000125459	55154	MSTO1	misato 1, mitochondrial distribution and morphology regulator	379.545	1.42861	2.31594e-32
ENSG00000178573	4094	MAF	MAF bZIP transcription factor	509.364	-1.35885	2.34305e-32
ENSG00000213639	5500	PPP1CB	protein phosphatase 1 catalytic subunit beta	8824.86	-0.848484	2.37172e-32
ENSG00000163291	152559	PAQR3	progestin and adipoQ receptor family member 3	977.783	1.24774	2.4315e-32
ENSG00000126368	9572	NR1D1	nuclear receptor subfamily 1 group D member 1	294.228	1.73529	2.45352e-32
ENSG00000146733	5723	PSPH	phosphoserine phosphatase	818.438	1.26437	2.95218e-32
ENSG00000108312	7343	UBTF	upstream binding transcription factor, RNA polymerase I	1140.1	-1.05327	3.07229e-32
ENSG00000197299	641	BLM	Bloom syndrome RecQ like helicase	295.116	-1.69841	3.23004e-32
ENSG00000150995	3708	ITPR1	inositol 1,4,5-trisphosphate receptor type 1	586.178	1.45377	3.32541e-32
ENSG00000116830	8458	TTF2	transcription termination factor 2	1119.75	-0.971664	3.37102e-32
ENSG00000146757	168374	ZNF92	zinc finger protein 92	266.052	-1.60316	3.78859e-32
ENSG00000125772	56261	GPCPD1	glycerophosphocholine phosphodiesterase 1	827.687	1.03883	3.91462e-32
ENSG00000044574	3309	HSPA5	heat shock protein family A (Hsp70) member 5	32211.2	2.81027	4.39108e-32
ENSG00000133026	4628	MYH10	myosin heavy chain 10	1581.79	-1.00121	4.41595e-32
ENSG00000149100	10480	EIF3M	eukaryotic translation initiation factor 3 subunit M	2541.37	0.8566	4.54527e-32
ENSG00000124006	23363	OBSL1	obscurin like 1	605.753	-1.38932	4.68987e-32
ENSG00000125944	10236	HNRNPR	heterogeneous nuclear ribonucleoprotein R	3565.02	-0.738219	4.78561e-32
ENSG00000101265	9770	RASSF2	Ras association domain family member 2	402.364	-1.60875	4.80725e-32
ENSG00000111371	81539	SLC38A1	solute carrier family 38 member 1	5166.21	2.896	4.91213e-32
ENSG00000169116	25849	PARM1	prostate androgen-regulated mucin-like protein 1	86.1445	3.9371	5.24165e-32
ENSG00000152377	6695	SPOCK1	SPARC/osteonectin, cwcv and kazal like domains proteoglycan 1	999.094	-1.02126	5.34226e-32
ENSG00000171877	84978	FRMD5	FERM domain containing 5	803.284	-1.22832	5.54628e-32
ENSG00000128656	1123	CHN1	chimerin 1	383.708	-1.46145	5.74353e-32
ENSG00000173068	54796	BNC2	basonuclin 2	733.465	-1.14218	5.8039e-32
ENSG00000159184	10481	HOXB13	homeobox B13	170.821	-2.01487	6.46197e-32
ENSG00000182541	3985	LIMK2	LIM domain kinase 2	318.972	-1.5133	6.50229e-32
ENSG00000146670	113130	CDCA5	cell division cycle associated 5	660.401	-1.51625	7.56383e-32
ENSG00000198517	7975	MAFK	MAF bZIP transcription factor K	750.423	1.37313	7.66469e-32
ENSG00000100297	4174	MCM5	minichromosome maintenance complex component 5	955.266	-1.51327	8.01855e-32
ENSG00000088205	8886	DDX18	DEAD-box helicase 18	1578.54	0.887091	8.50984e-32
ENSG00000139211	347902	AMIGO2	adhesion molecule with Ig like domain 2	1848.88	1.04533	1.08178e-31
ENSG00000126878	83543	AIF1L	allograft inflammatory factor 1 like	1342.22	-1.0954	1.09471e-31
ENSG00000143153	481	ATP1B1	ATPase Na+/K+ transporting subunit beta 1	1718.11	-1.06211	1.34713e-31
ENSG00000122566	3181	HNRNPA2B1	heterogeneous nuclear ribonucleoprotein A2/B1	15001.4	-0.558158	1.38285e-31
ENSG00000070371	8218	CLTCL1	clathrin heavy chain like 1	162.966	1.84805	1.89799e-31
ENSG00000119777	54867	TMEM214	transmembrane protein 214	1802.81	0.74212	1.89909e-31
ENSG00000127418	53834	FGFRL1	fibroblast growth factor receptor-like 1	4794.81	-1.30289	1.91082e-31
ENSG00000085840	4998	ORC1	origin recognition complex subunit 1	444.346	-1.59112	2.03806e-31
ENSG00000135318	4907	NT5E	5'-nucleotidase ecto	587.943	1.88372	2.31655e-31
ENSG00000050405	51474	LIMA1	LIM domain and actin binding 1	1103.9	-0.903361	2.34482e-31
ENSG00000166451	55839	CENPN	centromere protein N	603.349	-1.21456	2.45348e-31
ENSG00000106105	2617	GARS	glycyl-tRNA synthetase	9766.29	2.84178	2.54077e-31
ENSG00000110048	5007	OSBP	oxysterol binding protein	1331.48	1.04917	2.84337e-31
ENSG00000142156	1291	COL6A1	collagen type VI alpha 1 chain	3959.9	-0.870768	2.99324e-31
ENSG00000203760	387103	CENPW	centromere protein W	384.201	-1.5893	3.52921e-31
ENSG00000183337	54880	BCOR	BCL6 corepressor	826.69	-1.17616	3.58082e-31
ENSG00000075624	60	ACTB	actin beta	74594.2	-1.34328	3.8042e-31
ENSG00000037637	54455	FBXO42	F-box protein 42	839.441	1.14535	4.36693e-31
ENSG00000229644	NA	NA	NA	127.237	2.62819	4.43512e-31
ENSG00000198554	11169	WDHD1	WD repeat and HMG-box DNA binding protein 1	447.641	-1.26736	5.30735e-31
ENSG00000151746	636	BICD1	BICD cargo adaptor 1	838.32	-1.00222	5.46669e-31
ENSG00000078804	58476	TP53INP2	tumor protein p53 inducible nuclear protein 2	832.115	-1.24748	5.7554e-31
ENSG00000134987	134430	WDR36	WD repeat domain 36	983.073	1.2516	5.78304e-31
ENSG00000023909	2730	GCLM	glutamate-cysteine ligase modifier subunit	2493.23	0.772554	5.85928e-31
ENSG00000134871	1284	COL4A2	collagen type IV alpha 2 chain	3565.31	-0.916453	6.02941e-31
ENSG00000153823	55022	PID1	phosphotyrosine interaction domain containing 1	263.141	1.50959	6.29787e-31
ENSG00000173706	57493	HEG1	heart development protein with EGF like domains 1	1187.5	-1.16844	6.30183e-31
ENSG00000160209	8566	PDXK	pyridoxal kinase	1363.09	0.858137	6.67208e-31
ENSG00000018510	8540	AGPS	alkylglycerone phosphate synthase	3756.79	-0.767062	6.76047e-31
ENSG00000167693	64359	NXN	nucleoredoxin	412.467	-1.51136	7.13002e-31
ENSG00000148655	83938	C10orf11	chromosome 10 open reading frame 11	189.672	-1.94967	7.24822e-31
ENSG00000109452	8821	INPP4B	inositol polyphosphate-4-phosphatase type II B	284.458	1.50841	7.73194e-31
ENSG00000148606	11128	POLR3A	RNA polymerase III subunit A	1068.78	0.976441	7.95635e-31
ENSG00000138674	22872	SEC31A	SEC31 homolog A, COPII coat complex component	2760.14	0.7015	1.00498e-30
ENSG00000123983	2181	ACSL3	acyl-CoA synthetase long-chain family member 3	2103.38	-0.897401	1.03534e-30
ENSG00000184384	84441	MAML2	mastermind like transcriptional coactivator 2	466.867	-1.27967	1.03534e-30
ENSG00000049089	1298	COL9A2	collagen type IX alpha 2 chain	108.274	-3.29471	1.21866e-30
ENSG00000278709	105416157	NKILA	NF-kappaB interacting lncRNA	97.7772	-3.09085	1.26905e-30
ENSG00000121390	55269	PSPC1	paraspeckle component 1	524.505	-1.35536	1.35032e-30
ENSG00000179604	23580	CDC42EP4	CDC42 effector protein 4	860.697	-1.06699	1.58591e-30
ENSG00000105329	7040	TGFB1	transforming growth factor beta 1	2837.78	-1.19277	1.73128e-30
ENSG00000115977	22848	AAK1	AP2 associated kinase 1	1773.12	1.48963	1.74816e-30
ENSG00000176171	664	BNIP3	BCL2 interacting protein 3	2188.96	1.12944	1.77841e-30
ENSG00000160014	805	CALM2	calmodulin 2	4472.75	-1.28131	1.78864e-30
ENSG00000221829	2189	FANCG	Fanconi anemia complementation group G	509.291	-1.37521	1.89517e-30
ENSG00000130733	78992	YIPF2	Yip1 domain family member 2	357.56	1.27744	2.30156e-30
ENSG00000160094	149076	ZNF362	zinc finger protein 362	355.895	-1.51801	2.30413e-30
ENSG00000113328	900	CCNG1	cyclin G1	1271.99	-0.913001	2.33357e-30
ENSG00000196449	79693	YRDC	yrdC N6-threonylcarbamoyltransferase domain containing	540.478	1.12402	2.45068e-30
ENSG00000102048	140462	ASB9	ankyrin repeat and SOCS box containing 9	126.3	-2.51189	2.46333e-30
ENSG00000164023	166929	SGMS2	sphingomyelin synthase 2	324.542	1.57659	2.51095e-30
ENSG00000105810	1021	CDK6	cyclin dependent kinase 6	1762.54	-1.06318	2.77613e-30
ENSG00000204387	50854	C6orf48	chromosome 6 open reading frame 48	1297.72	0.957218	2.81554e-30
ENSG00000147155	10682	EBP	emopamil binding protein (sterol isomerase)	1104.94	-1.35352	2.85097e-30
ENSG00000213722	23564	DDAH2	dimethylarginine dimethylaminohydrolase 2	273.744	-1.80216	2.99987e-30
ENSG00000157404	3815	KIT	KIT proto-oncogene receptor tyrosine kinase	75.8368	-4.2975	3.00646e-30
ENSG00000163818	54585	LZTFL1	leucine zipper transcription factor like 1	463.897	1.59802	3.17024e-30
ENSG00000137942	54874	FNBP1L	formin binding protein 1 like	787.459	-1.14762	3.49165e-30
ENSG00000145362	287	ANK2	ankyrin 2	616.377	1.15052	3.54682e-30
ENSG00000187801	65243	ZFP69B	ZFP69 zinc finger protein B	115.181	3.11985	3.54682e-30
ENSG00000156504	159090	FAM122B	family with sequence similarity 122B	1314.42	-0.907488	3.62153e-30
ENSG00000145934	57451	TENM2	teneurin transmembrane protein 2	3597.23	-0.942832	3.97691e-30
ENSG00000182718	302	ANXA2	annexin A2	26170.1	-1.0304	4.27422e-30
ENSG00000131094	10882	C1QL1	complement C1q like 1	483.556	-1.98131	4.36591e-30
ENSG00000075568	23505	TMEM131	transmembrane protein 131	1008.1	1.19584	4.69094e-30
ENSG00000101928	56180	MOSPD1	motile sperm domain containing 1	470.506	1.1508	5.58997e-30
ENSG00000105426	5802	PTPRS	protein tyrosine phosphatase, receptor type S	1928.64	-0.938309	5.59284e-30
ENSG00000151135	90488	TMEM263	transmembrane protein 263	1806.63	0.954965	5.76676e-30
ENSG00000112312	51053	GMNN	geminin, DNA replication inhibitor	534.602	-1.22238	5.79462e-30
ENSG00000058600	55718	POLR3E	RNA polymerase III subunit E	397.137	1.40581	6.27229e-30
ENSG00000168488	11273	ATXN2L	ataxin 2 like	1677.5	0.899844	6.40898e-30
ENSG00000131080	60401	EDA2R	ectodysplasin A2 receptor	105.943	2.8674	6.8508e-30
ENSG00000120254	25902	MTHFD1L	methylenetetrahydrofolate dehydrogenase (NADP+ dependent) 1-like	1210.12	1.06296	6.92529e-30
ENSG00000178878	81575	APOLD1	apolipoprotein L domain containing 1	208.455	-1.74441	6.92775e-30
ENSG00000026508	960	CD44	CD44 molecule (Indian blood group)	19831.4	-0.763073	7.02451e-30
ENSG00000154144	84897	TBRG1	transforming growth factor beta regulator 1	447.415	1.27049	7.16059e-30
ENSG00000136152	83548	COG3	component of oligomeric golgi complex 3	485.388	1.22003	7.66368e-30
ENSG00000269893	100093630	SNHG8	small nucleolar RNA host gene 8	449.002	1.24002	7.68988e-30
ENSG00000126705	27245	AHDC1	AT-hook DNA binding motif containing 1	358.07	-1.53919	8.44504e-30
ENSG00000124783	6745	SSR1	signal sequence receptor subunit 1	5855.23	0.764653	1.08278e-29
ENSG00000143799	142	PARP1	poly(ADP-ribose) polymerase 1	3532.14	-0.892035	1.10024e-29
ENSG00000127483	50809	HP1BP3	heterochromatin protein 1 binding protein 3	3755.4	-0.728132	1.15129e-29
ENSG00000079459	2222	FDFT1	farnesyl-diphosphate farnesyltransferase 1	2001.54	-0.912683	1.16659e-29
ENSG00000064666	1265	CNN2	calponin 2	1981.47	-1.21041	1.21123e-29
ENSG00000144810	1295	COL8A1	collagen type VIII alpha 1 chain	403.505	-1.51925	1.35109e-29
ENSG00000071539	9319	TRIP13	thyroid hormone receptor interactor 13	768.918	-1.08847	1.40812e-29
ENSG00000128965	79094	CHAC1	ChaC glutathione specific gamma-glutamylcyclotransferase 1	635.757	5.04536	1.51974e-29
ENSG00000115963	390	RND3	Rho family GTPase 3	1462.36	3.2297	1.59092e-29
ENSG00000132819	55544	RBM38	RNA binding motif protein 38	583.98	-1.39025	1.5935e-29
ENSG00000119523	85365	ALG2	ALG2, alpha-1,3/1,6-mannosyltransferase	626.705	1.05664	1.6646e-29
ENSG00000106392	56913	C1GALT1	core 1 synthase, glycoprotein-N-acetylgalactosamine 3-beta-galactosyltransferase 1	812.437	1.28813	1.77133e-29
ENSG00000173846	1263	PLK3	polo like kinase 3	220.296	1.56736	1.7884e-29
ENSG00000138376	580	BARD1	BRCA1 associated RING domain 1	248.333	-1.55726	1.92481e-29
ENSG00000183696	7378	UPP1	uridine phosphorylase 1	3318.85	2.80088	1.96825e-29
ENSG00000133112	7178	TPT1	tumor protein, translationally-controlled 1	10135.4	0.936516	2.08163e-29
ENSG00000185565	4045	LSAMP	limbic system-associated membrane protein	178.65	-2.23819	2.21626e-29
ENSG00000137955	5876	RABGGTB	Rab geranylgeranyltransferase beta subunit	1291.98	1.06959	2.39557e-29
ENSG00000116128	607	BCL9	B-cell CLL/lymphoma 9	721.554	-1.29374	2.43271e-29
ENSG00000198796	115701	ALPK2	alpha kinase 2	615.88	-1.09261	2.51024e-29
ENSG00000125266	1948	EFNB2	ephrin B2	1067	-1.0629	2.58119e-29
ENSG00000115275	7841	MOGS	mannosyl-oligosaccharide glucosidase	1024.08	0.912586	2.66231e-29
ENSG00000235385	109729169	LINC02154	long intergenic non-protein coding RNA 2154	256.354	1.77107	2.89919e-29
ENSG00000155506	23367	LARP1	La ribonucleoprotein domain family member 1	5140.29	0.726292	2.97053e-29
ENSG00000079819	2037	EPB41L2	erythrocyte membrane protein band 4.1 like 2	1995.64	-0.706987	3.05893e-29
ENSG00000112769	3910	LAMA4	laminin subunit alpha 4	2689.29	-0.90671	3.28336e-29
ENSG00000115468	80303	EFHD1	EF-hand domain family member D1	113.16	-3.46691	3.43659e-29
ENSG00000141753	3487	IGFBP4	insulin like growth factor binding protein 4	192.452	-1.80938	3.8363e-29
ENSG00000101412	1869	E2F1	E2F transcription factor 1	882.881	-1.7247	3.84429e-29
ENSG00000060718	1301	COL11A1	collagen type XI alpha 1 chain	212.007	-1.83003	4.3176e-29
ENSG00000187678	81848	SPRY4	sprouty RTK signaling antagonist 4	505.356	1.20444	4.41306e-29
ENSG00000146409	116843	SLC18B1	solute carrier family 18 member B1	391.642	1.23699	4.55506e-29
ENSG00000149218	23052	ENDOD1	endonuclease domain containing 1	672.913	-1.0728	5.20822e-29
ENSG00000087274	118	ADD1	adducin 1	2771.79	-0.736596	5.32685e-29
ENSG00000105778	23080	AVL9	AVL9 cell migration associated	1461.93	0.963786	5.33062e-29
ENSG00000180398	90411	MCFD2	multiple coagulation factor deficiency 2	3122.45	0.766876	5.49079e-29
ENSG00000091651	23594	ORC6	origin recognition complex subunit 6	776.102	-1.02387	5.56184e-29
ENSG00000093009	8318	CDC45	cell division cycle 45	297.122	-1.66134	5.71255e-29
ENSG00000242265	23089	PEG10	paternally expressed 10	4992.79	-0.71074	6.1537e-29
ENSG00000132432	23480	SEC61G	Sec61 translocon gamma subunit	1785.38	1.05873	6.18597e-29
ENSG00000166289	79156	PLEKHF1	pleckstrin homology and FYVE domain containing 1	270.541	1.59873	6.60193e-29
ENSG00000173218	81839	VANGL1	VANGL planar cell polarity protein 1	1649.27	-0.894082	6.60193e-29
ENSG00000134278	56907	SPIRE1	spire type actin nucleation factor 1	644.82	1.10919	7.06055e-29
ENSG00000160746	55129	ANO10	anoctamin 10	993.707	0.994717	7.40888e-29
ENSG00000132768	1802	DPH2	DPH2 homolog	601.863	0.977824	7.92538e-29
ENSG00000249992	25907	TMEM158	transmembrane protein 158 (gene/pseudogene)	344.97	2.1129	7.99625e-29
ENSG00000102804	8848	TSC22D1	TSC22 domain family member 1	1958.03	-0.754458	8.30029e-29
ENSG00000157259	57798	GATAD1	GATA zinc finger domain containing 1	618.177	1.11831	8.33629e-29
ENSG00000173221	2745	GLRX	glutaredoxin	320.417	1.51049	8.46554e-29
ENSG00000140945	1012	CDH13	cadherin 13	1981.56	0.991695	1.00844e-28
ENSG00000161638	3678	ITGA5	integrin subunit alpha 5	1110.44	0.898352	1.27162e-28
ENSG00000156804	114907	FBXO32	F-box protein 32	3288.53	-0.773869	1.28464e-28
ENSG00000179954	284297	SSC5D	scavenger receptor cysteine rich family member with 5 domains	100.918	-3.03429	1.2894e-28
ENSG00000163931	7086	TKT	transketolase	15038.7	-1.08941	1.34871e-28
ENSG00000197081	3482	IGF2R	insulin like growth factor 2 receptor	6011.1	1.0827	1.57445e-28
ENSG00000163346	57326	PBXIP1	PBX homeobox interacting protein 1	1202.82	-1.08974	1.62118e-28
ENSG00000164181	79993	ELOVL7	ELOVL fatty acid elongase 7	229.139	1.61071	1.73093e-28
ENSG00000157916	11079	RER1	retention in endoplasmic reticulum sorting receptor 1	2437.29	0.87074	1.80734e-28
ENSG00000163251	7855	FZD5	frizzled class receptor 5	460.517	-1.23334	1.83035e-28
ENSG00000013619	10046	MAMLD1	mastermind like domain containing 1	249.333	-1.47128	1.89765e-28
ENSG00000169604	84168	ANTXR1	anthrax toxin receptor 1	1754.22	-0.889102	2.39282e-28
ENSG00000148399	92715	DPH7	diphthamide biosynthesis 7	336.469	1.27673	2.54448e-28
ENSG00000065054	9351	SLC9A3R2	SLC9A3 regulator 2	1017.47	-1.13124	2.66331e-28
ENSG00000103423	9093	DNAJA3	DnaJ heat shock protein family (Hsp40) member A3	853.153	0.998738	2.99555e-28
ENSG00000140451	80119	PIF1	PIF1 5'-to-3' DNA helicase	183.215	-2.00878	3.12964e-28
ENSG00000124795	7913	DEK	DEK proto-oncogene	4725.08	-0.834527	3.63526e-28
ENSG00000163762	116441	TM4SF18	transmembrane 4 L six family member 18	73.3418	-3.40154	3.68116e-28
ENSG00000136643	26750	RPS6KC1	ribosomal protein S6 kinase C1	700.049	1.26958	3.77213e-28
ENSG00000006210	6376	CX3CL1	C-X3-C motif chemokine ligand 1	200.904	-2.00995	3.84905e-28
ENSG00000188039	284434	NWD1	NACHT and WD repeat domain containing 1	98.0978	-5.87818	3.86056e-28
ENSG00000136156	9445	ITM2B	integral membrane protein 2B	7698	-0.909717	3.90415e-28
ENSG00000156502	6832	SUPV3L1	Suv3 like RNA helicase	667.838	1.10168	4.04109e-28
ENSG00000173193	54625	PARP14	poly(ADP-ribose) polymerase family member 14	789.755	-1.10977	4.13277e-28
ENSG00000144136	6574	SLC20A1	solute carrier family 20 member 1	3039.99	0.70643	4.45543e-28
ENSG00000159259	8208	CHAF1B	chromatin assembly factor 1 subunit B	370.918	-1.54363	4.69755e-28
ENSG00000103145	54985	HCFC1R1	host cell factor C1 regulator 1	305.883	-1.55395	4.71191e-28
ENSG00000131844	64087	MCCC2	methylcrotonoyl-CoA carboxylase 2	1549.16	-0.921741	4.72572e-28
ENSG00000122545	989	2018-09-07	septin 7	4705.79	-0.671375	4.75762e-28
ENSG00000163485	134	ADORA1	adenosine A1 receptor	108.42	-2.82181	4.9983e-28
ENSG00000065308	9697	TRAM2	translocation associated membrane protein 2	2261.97	-0.764018	5.03654e-28
ENSG00000107960	79991	STN1	STN1, CST complex subunit	501.239	-1.33911	5.60889e-28
ENSG00000068912	27248	ERLEC1	endoplasmic reticulum lectin 1	1436.09	0.957422	6.07481e-28
ENSG00000184564	84189	SLITRK6	SLIT and NTRK like family member 6	109.1	2.18143	7.82235e-28
ENSG00000186104	120227	CYP2R1	cytochrome P450 family 2 subfamily R member 1	114.042	2.27778	7.97808e-28
ENSG00000076248	7374	UNG	uracil DNA glycosylase	618.016	-1.75184	8.45399e-28
ENSG00000145777	85480	TSLP	thymic stromal lymphopoietin	55.2981	5.26807	8.64404e-28
ENSG00000125952	4149	MAX	MYC associated factor X	418.395	1.30986	9.0002e-28
ENSG00000182253	23336	SYNM	synemin	1166.76	-0.894195	9.4241e-28
ENSG00000197746	5660	PSAP	prosaposin	24314.4	0.663529	9.8744e-28
ENSG00000160447	29941	PKN3	protein kinase N3	146.404	-2.20453	1.04442e-27
ENSG00000223764	100130417	LOC100130417	uncharacterized LOC100130417	187.592	-1.75648	1.19402e-27
ENSG00000175745	7025	NR2F1	nuclear receptor subfamily 2 group F member 1	697.652	-1.12573	1.33872e-27
ENSG00000054965	23201	FAM168A	family with sequence similarity 168 member A	1266.2	-0.966961	1.49591e-27
ENSG00000140443	3480	IGF1R	insulin like growth factor 1 receptor	1763.47	-0.936125	1.51853e-27
ENSG00000219507	NA	NA	NA	107.792	2.1844	1.52915e-27
ENSG00000080839	5933	RBL1	RB transcriptional corepressor like 1	605.758	-1.02223	1.54718e-27
ENSG00000104312	8767	RIPK2	receptor interacting serine/threonine kinase 2	331.68	1.4581	1.61016e-27
ENSG00000157150	7079	TIMP4	TIMP metallopeptidase inhibitor 4	169.743	1.68515	1.91142e-27
ENSG00000146263	253714	MMS22L	MMS22 like, DNA repair protein	553.019	-1.08741	1.95235e-27
ENSG00000120539	84930	MASTL	microtubule associated serine/threonine kinase like	427.374	-1.27778	1.98698e-27
ENSG00000197467	1305	COL13A1	collagen type XIII alpha 1 chain	147.561	2.46964	2.01857e-27
ENSG00000156639	60685	ZFAND3	zinc finger AN1-type containing 3	1802.05	0.693268	2.07994e-27
ENSG00000130147	23677	SH3BP4	SH3 domain binding protein 4	2636.9	-0.974343	2.19799e-27
ENSG00000105429	1954	MEGF8	multiple EGF like domains 8	2262.02	-1.13973	2.30142e-27
ENSG00000106823	1842	ECM2	extracellular matrix protein 2	56.7683	5.0787	2.31965e-27
ENSG00000095203	54566	EPB41L4B	erythrocyte membrane protein band 4.1 like 4B	100.179	2.57409	2.44929e-27
ENSG00000133706	51520	LARS	leucyl-tRNA synthetase	3213.65	0.77599	2.53399e-27
ENSG00000174738	9975	NR1D2	nuclear receptor subfamily 1 group D member 2	1584.48	1.24799	2.55667e-27
ENSG00000164934	25879	DCAF13	DDB1 and CUL4 associated factor 13	909.787	0.981342	2.9299e-27
ENSG00000100664	1983	EIF5	eukaryotic translation initiation factor 5	3705.26	0.851712	3.17237e-27
ENSG00000085999	8438	RAD54L	RAD54 like (S. cerevisiae)	244.488	-2.08252	3.32504e-27
ENSG00000157827	114793	FMNL2	formin like 2	913.684	-1.04487	3.43947e-27
ENSG00000125304	9375	TM9SF2	transmembrane 9 superfamily member 2	3820.16	0.838884	3.6293e-27
ENSG00000129810	151648	SGO1	shugoshin 1	202.993	-1.66298	3.93646e-27
ENSG00000177508	79191	IRX3	iroquois homeobox 3	180.983	-1.7895	3.96859e-27
ENSG00000157483	4643	MYO1E	myosin IE	1295.65	-0.835042	4.06383e-27
ENSG00000060656	10076	PTPRU	protein tyrosine phosphatase, receptor type U	956.664	-1.59509	4.14001e-27
ENSG00000140848	221184	CPNE2	copine 2	676.044	-1.08001	4.14001e-27
ENSG00000102996	4324	MMP15	matrix metallopeptidase 15	220.068	-1.71791	4.42346e-27
ENSG00000145391	80854	SETD7	SET domain containing lysine methyltransferase 7	2637.02	0.923796	4.47388e-27
ENSG00000183779	80139	ZNF703	zinc finger protein 703	583.23	-1.17704	4.59433e-27
ENSG00000113140	6678	SPARC	secreted protein acidic and cysteine rich	22488.8	-0.938788	4.83265e-27
ENSG00000138796	3033	HADH	hydroxyacyl-CoA dehydrogenase	430.164	-1.14933	4.85802e-27
ENSG00000130052	9754	STARD8	StAR related lipid transfer domain containing 8	103.295	-2.50883	6.91086e-27
ENSG00000100065	29775	CARD10	caspase recruitment domain family member 10	328.758	-1.54736	7.13043e-27
ENSG00000104228	23087	TRIM35	tripartite motif containing 35	299.797	1.26624	7.23852e-27
ENSG00000088826	54498	SMOX	spermine oxidase	694.762	1.10476	7.51821e-27
ENSG00000108651	55813	UTP6	UTP6, small subunit processome component	918.043	0.902092	7.79439e-27
ENSG00000205269	100113407	TMEM170B	transmembrane protein 170B	554.308	-1.04318	8.1844e-27
ENSG00000052841	55761	TTC17	tetratricopeptide repeat domain 17	1354.03	0.879867	8.87369e-27
ENSG00000151779	51594	NBAS	neuroblastoma amplified sequence	903.187	1.31503	9.44805e-27
ENSG00000159335	5763	PTMS	parathymosin	2771.2	-1.13433	9.69554e-27
ENSG00000168159	149603	RNF187	ring finger protein 187	2519.26	0.971876	1.0475e-26
ENSG00000031691	55166	CENPQ	centromere protein Q	307.436	-1.70239	1.09356e-26
ENSG00000175567	7351	UCP2	uncoupling protein 2	206.269	-1.9905	1.09356e-26
ENSG00000070495	23210	JMJD6	arginine demethylase and lysine hydroxylase	489.432	1.09825	1.22827e-26
ENSG00000243156	57553	MICAL3	microtubule associated monooxygenase, calponin and LIM domain containing 3	506.829	-1.42056	1.2327e-26
ENSG00000134569	4038	LRP4	LDL receptor related protein 4	260.022	-1.43527	1.28806e-26
ENSG00000153976	9953	HS3ST3B1	heparan sulfate-glucosamine 3-sulfotransferase 3B1	2042.14	-1.18065	1.33081e-26
ENSG00000121211	84057	MND1	meiotic nuclear divisions 1	159.919	-1.93094	1.39135e-26
ENSG00000186193	89958	SAPCD2	suppressor APC domain containing 2	353.233	-1.34666	1.45901e-26
ENSG00000158615	84919	PPP1R15B	protein phosphatase 1 regulatory subunit 15B	1491.21	0.920956	1.47827e-26
ENSG00000168036	1499	CTNNB1	catenin beta 1	7184.32	-0.705371	1.48651e-26
ENSG00000145604	6502	SKP2	S-phase kinase associated protein 2	325.544	-1.36766	1.60161e-26
ENSG00000152990	166647	ADGRA3	adhesion G protein-coupled receptor A3	900.362	-0.889381	1.83712e-26
ENSG00000013275	5704	PSMC4	proteasome 26S subunit, ATPase 4	2706.61	0.834593	1.98411e-26
ENSG00000188211	374383	NCR3LG1	natural killer cell cytotoxicity receptor 3 ligand 1	149.108	2.93328	2.04996e-26
ENSG00000013374	51667	NUB1	negative regulator of ubiquitin like proteins 1	1193.99	0.844033	2.1174e-26
ENSG00000231131	101928687	LINC01468	long intergenic non-protein coding RNA 1468	243.481	1.85855	2.41759e-26
ENSG00000166562	90701	SEC11C	SEC11 homolog C, signal peptidase complex subunit	216.089	1.68948	2.47831e-26
ENSG00000155380	6566	SLC16A1	solute carrier family 16 member 1	3327.63	0.834431	2.70089e-26
ENSG00000115365	10314	LANCL1	LanC like 1	807.679	-1.12415	2.8863e-26
ENSG00000156011	23362	PSD3	pleckstrin and Sec7 domain containing 3	928.897	-1.14275	2.8863e-26
ENSG00000125726	970	CD70	CD70 molecule	2514.78	-1.22452	3.16305e-26
ENSG00000162627	51375	SNX7	sorting nexin 7	1364.13	-1.17042	3.17127e-26
ENSG00000184445	9735	KNTC1	kinetochore associated 1	455.105	-1.23563	3.1713e-26
ENSG00000168297	54899	PXK	PX domain containing serine/threonine kinase like	387.7	1.19757	3.32358e-26
ENSG00000152404	143884	CWF19L2	CWF19 like 2, cell cycle control (S. pombe)	408.095	-1.15224	3.33418e-26
ENSG00000085511	4216	MAP3K4	mitogen-activated protein kinase kinase kinase 4	2141.77	-0.839223	3.54986e-26
ENSG00000166401	5271	SERPINB8	serpin family B member 8	225.553	1.68361	3.58422e-26
ENSG00000146242	7162	TPBG	trophoblast glycoprotein	962.435	1.02906	3.64773e-26
ENSG00000065809	83641	FAM107B	family with sequence similarity 107 member B	479.56	1.024	3.71591e-26
ENSG00000138696	658	BMPR1B	bone morphogenetic protein receptor type 1B	340.011	-1.47308	3.72598e-26
ENSG00000160570	162989	DEDD2	death effector domain containing 2	590.653	1.03014	3.98912e-26
ENSG00000161040	222235	FBXL13	F-box and leucine rich repeat protein 13	73.9856	2.81234	3.98912e-26
ENSG00000197157	27044	SND1	staphylococcal nuclease and tudor domain containing 1	4283.26	0.636082	4.08507e-26
ENSG00000105974	857	CAV1	caveolin 1	4242.14	-1.04453	4.21553e-26
ENSG00000197183	140688	NOL4L	nucleolar protein 4 like	632.456	-1.04491	4.26868e-26
ENSG00000135241	50640	PNPLA8	patatin like phospholipase domain containing 8	1304.97	1.04363	4.60313e-26
ENSG00000119699	7043	TGFB3	transforming growth factor beta 3	124.677	-2.59727	4.8854e-26
ENSG00000122678	27434	POLM	DNA polymerase mu	435.39	1.24116	5.14643e-26
ENSG00000162909	824	CAPN2	calpain 2	5961.11	0.763593	5.30744e-26
ENSG00000198146	54989	ZNF770	zinc finger protein 770	711.797	1.22228	5.55276e-26
ENSG00000119408	10783	NEK6	NIMA related kinase 6	904.947	-1.08008	5.69151e-26
ENSG00000164638	222962	SLC29A4	solute carrier family 29 member 4	212.161	-1.98996	6.06567e-26
ENSG00000144566	5868	RAB5A	RAB5A, member RAS oncogene family	1158.83	0.957763	6.55496e-26
ENSG00000145390	54532	USP53	ubiquitin specific peptidase 53	1173.46	2.55304	7.21202e-26
ENSG00000069667	6095	RORA	RAR related orphan receptor A	94.9055	2.61915	7.22784e-26
ENSG00000165661	169714	QSOX2	quiescin sulfhydryl oxidase 2	497.647	1.14689	7.40415e-26
ENSG00000142798	3339	HSPG2	heparan sulfate proteoglycan 2	542.189	-1.5546	7.61709e-26
ENSG00000148358	57720	GPR107	G protein-coupled receptor 107	1788.76	1.04953	7.61709e-26
ENSG00000127824	7277	TUBA4A	tubulin alpha 4a	254.686	-1.75963	7.92555e-26
ENSG00000133119	5983	RFC3	replication factor C subunit 3	559.343	-1.39396	9.02731e-26
ENSG00000172115	54205	CYCS	cytochrome c, somatic	4495.56	0.908437	9.05029e-26
ENSG00000116044	4780	NFE2L2	nuclear factor, erythroid 2 like 2	1163.96	0.896426	9.25975e-26
ENSG00000112640	5528	PPP2R5D	protein phosphatase 2 regulatory subunit B'delta	1007.94	-0.940426	9.29171e-26
ENSG00000111670	79158	GNPTAB	N-acetylglucosamine-1-phosphate transferase alpha and beta subunits	843.604	-0.867486	9.97164e-26
ENSG00000173402	1605	DAG1	dystroglycan 1	4603.66	-0.868708	1.00858e-25
ENSG00000169432	6335	SCN9A	sodium voltage-gated channel alpha subunit 9	129.409	4.88879	1.02121e-25
ENSG00000169184	4330	MN1	MN1 proto-oncogene, transcriptional regulator	118.862	-2.31747	1.02951e-25
ENSG00000175197	1649	DDIT3	DNA damage inducible transcript 3	414.571	4.54233	1.1221e-25
ENSG00000135297	25821	MTO1	mitochondrial tRNA translation optimization 1	388.031	1.17056	1.23896e-25
ENSG00000130635	1289	COL5A1	collagen type V alpha 1 chain	6508.02	-0.804972	1.29019e-25
ENSG00000143013	8543	LMO4	LIM domain only 4	2662.05	-1.00416	1.31519e-25
ENSG00000141232	10140	TOB1	transducer of ERBB2, 1	603.462	-1.06047	1.3224e-25
ENSG00000152684	53918	PELO	pelota homolog (Drosophila)	796.63	1.0494	1.42398e-25
ENSG00000087253	54947	LPCAT2	lysophosphatidylcholine acyltransferase 2	1350.95	-0.974661	1.45476e-25
ENSG00000178401	79962	DNAJC22	DnaJ heat shock protein family (Hsp40) member C22	335.172	-1.45661	1.4575e-25
ENSG00000074696	51495	HACD3	3-hydroxyacyl-CoA dehydratase 3	1991.38	-0.814061	1.57871e-25
ENSG00000112473	7922	SLC39A7	solute carrier family 39 member 7	3739.3	0.611728	1.60976e-25
ENSG00000167721	55720	TSR1	TSR1, ribosome maturation factor	1308.52	0.734434	1.60976e-25
ENSG00000145819	23092	ARHGAP26	Rho GTPase activating protein 26	401.544	1.23966	1.62316e-25
ENSG00000104419	10397	NDRG1	N-myc downstream regulated 1	2066.35	2.52193	1.63343e-25
ENSG00000059769	548645	DNAJC25	DnaJ heat shock protein family (Hsp40) member C25	231.551	1.63538	1.7432e-25
ENSG00000083642	23047	PDS5B	PDS5 cohesin associated factor B	618.417	-0.95684	1.78034e-25
ENSG00000106080	55033	FKBP14	FK506 binding protein 14	891.966	1.1026	1.93475e-25
ENSG00000198853	9853	RUSC2	RUN and SH3 domain containing 2	551.691	1.21916	2.09432e-25
ENSG00000140464	5371	PML	promyelocytic leukemia	808.804	-0.925462	2.16083e-25
ENSG00000133134	84707	BEX2	brain expressed X-linked 2	437.748	4.41979	2.17991e-25
ENSG00000196535	399687	MYO18A	myosin XVIIIA	1014.71	-1.18948	2.29189e-25
ENSG00000189067	9516	LITAF	lipopolysaccharide induced TNF factor	946.572	-1.04921	2.36053e-25
ENSG00000020129	23154	NCDN	neurochondrin	673.299	0.870146	2.3735e-25
ENSG00000221963	80830	APOL6	apolipoprotein L6	173.67	1.69097	2.3977e-25
ENSG00000196517	6536	SLC6A9	solute carrier family 6 member 9	793.245	2.98207	2.90614e-25
ENSG00000137575	6386	SDCBP	syndecan binding protein	2613.89	0.90675	2.9098e-25
ENSG00000143575	10456	HAX1	HCLS1 associated protein X-1	1102.63	0.886135	2.92522e-25
ENSG00000162745	25903	OLFML2B	olfactomedin like 2B	63.3852	-3.8754	2.92522e-25
ENSG00000166340	1200	TPP1	tripeptidyl peptidase 1	829.926	0.977354	2.93626e-25
ENSG00000011105	10867	TSPAN9	tetraspanin 9	396.87	-1.21797	2.94478e-25
ENSG00000211455	23012	STK38L	serine/threonine kinase 38 like	530.111	-1.09081	3.19261e-25
ENSG00000150347	84159	ARID5B	AT-rich interaction domain 5B	1420.26	-0.840028	4.15632e-25
ENSG00000147130	9203	ZMYM3	zinc finger MYM-type containing 3	803.797	-0.997685	4.29149e-25
ENSG00000141905	4782	NFIC	nuclear factor I C	3468.99	-0.779733	4.33374e-25
ENSG00000148396	9919	SEC16A	SEC16 homolog A, endoplasmic reticulum export factor	1904.64	1.04568	4.33985e-25
ENSG00000074695	3998	LMAN1	lectin, mannose binding 1	1739.6	0.911797	4.35499e-25
ENSG00000138709	55132	LARP1B	La ribonucleoprotein domain family member 1B	519.233	1.29903	4.51174e-25
ENSG00000187266	2057	EPOR	erythropoietin receptor	237.652	1.3651	4.53886e-25
ENSG00000105290	333	APLP1	amyloid beta precursor like protein 1	553.06	-1.28708	4.56251e-25
ENSG00000154146	4900	NRGN	neurogranin	296.084	-1.97541	4.63481e-25
ENSG00000164509	133396	IL31RA	interleukin 31 receptor A	248.358	1.85768	4.65856e-25
ENSG00000151012	23657	SLC7A11	solute carrier family 7 member 11	14277.7	2.09656	4.811e-25
ENSG00000179195	144348	ZNF664	zinc finger protein 664	2687.02	0.855398	5.48272e-25
ENSG00000108578	642	BLMH	bleomycin hydrolase	958.912	-0.883971	5.85043e-25
ENSG00000225614	84627	ZNF469	zinc finger protein 469	256.923	1.45933	6.54649e-25
ENSG00000151892	2674	GFRA1	GDNF family receptor alpha 1	522.828	-1.12844	6.88815e-25
ENSG00000188612	6613	SUMO2	small ubiquitin-like modifier 2	1649.53	-1.0632	7.21759e-25
ENSG00000166261	7753	ZNF202	zinc finger protein 202	233.566	1.7131	7.46072e-25
ENSG00000123562	9643	MORF4L2	mortality factor 4 like 2	7992.6	0.636724	7.47058e-25
ENSG00000087074	23645	PPP1R15A	protein phosphatase 1 regulatory subunit 15A	3144.75	2.98939	7.9195e-25
ENSG00000008710	5310	PKD1	polycystin 1, transient receptor potential channel interacting	1211.62	1.1348	8.15674e-25
ENSG00000167460	7171	TPM4	tropomyosin 4	9295.64	-0.732744	8.1913e-25
ENSG00000162772	467	ATF3	activating transcription factor 3	621.973	3.78194	8.65964e-25
ENSG00000154678	5137	PDE1C	phosphodiesterase 1C	3175.5	0.798079	8.76901e-25
ENSG00000178980	6415	SELENOW	selenoprotein W	837.691	-1.07266	9.63867e-25
ENSG00000131171	6451	SH3BGRL	SH3 domain binding glutamate rich protein like	1057.88	-0.992176	1.02044e-24
ENSG00000188501	197021	LCTL	lactase like	135.258	-1.98268	1.03057e-24
ENSG00000154589	23643	LY96	lymphocyte antigen 96	163.921	1.70805	1.04774e-24
ENSG00000154188	284	ANGPT1	angiopoietin 1	93.9818	-2.54139	1.08446e-24
ENSG00000186174	283149	BCL9L	B-cell CLL/lymphoma 9 like	1450.43	-0.915278	1.137e-24
ENSG00000186395	3858	KRT10	keratin 10	999.895	1.12383	1.18602e-24
ENSG00000173559	64859	NABP1	nucleic acid binding protein 1	319.162	1.41051	1.19109e-24
ENSG00000109674	55247	NEIL3	nei like DNA glycosylase 3	293.213	-1.61914	1.28621e-24
ENSG00000125247	84899	TMTC4	transmembrane and tetratricopeptide repeat containing 4	234.533	-1.40567	1.30794e-24
ENSG00000085733	2017	CTTN	cortactin	2278.07	0.705073	1.39667e-24
ENSG00000197712	92689	FAM114A1	family with sequence similarity 114 member A1	1071.58	0.773509	1.47752e-24
ENSG00000113615	10802	SEC24A	SEC24 homolog A, COPII coat complex component	1415.38	1.07735	1.61497e-24
ENSG00000125347	3659	IRF1	interferon regulatory factor 1	200.836	1.54515	1.656e-24
ENSG00000084710	22979	EFR3B	EFR3 homolog B	192.581	-1.63233	1.83261e-24
ENSG00000137331	8870	IER3	immediate early response 3	150.717	1.7681	1.98953e-24
ENSG00000105270	25999	CLIP3	CAP-Gly domain containing linker protein 3	388.762	-1.44726	2.08686e-24
ENSG00000007174	1770	DNAH9	dynein axonemal heavy chain 9	55.8331	-4.40066	2.12689e-24
ENSG00000145241	1060	CENPC	centromere protein C	407.937	-1.2583	2.16168e-24
ENSG00000159176	1465	CSRP1	cysteine and glycine rich protein 1	2608.59	0.659952	2.17738e-24
ENSG00000111642	1108	CHD4	chromodomain helicase DNA binding protein 4	4331.18	-0.692589	2.21687e-24
ENSG00000133401	23037	PDZD2	PDZ domain containing 2	440.634	-1.44633	2.31214e-24
ENSG00000144895	83939	EIF2A	eukaryotic translation initiation factor 2A	1052.59	0.81478	2.31455e-24
ENSG00000275342	157285	PRAG1	PEAK1 related kinase activating pseudokinase 1	337.98	-1.24351	2.44944e-24
ENSG00000136718	92856	IMP4	IMP4 homolog, U3 small nucleolar ribonucleoprotein	709.958	0.897822	2.65999e-24
ENSG00000248429	NA	NA	NA	89.1986	-2.36704	2.70916e-24
ENSG00000132510	23135	KDM6B	lysine demethylase 6B	537.848	1.24854	2.71833e-24
ENSG00000005700	25998	IBTK	inhibitor of Bruton tyrosine kinase	1624.59	1.08664	2.72223e-24
ENSG00000196935	57522	SRGAP1	SLIT-ROBO Rho GTPase activating protein 1	311.049	1.50312	2.72802e-24
ENSG00000115355	55704	CCDC88A	coiled-coil domain containing 88A	1462.42	-0.724959	2.91635e-24
ENSG00000129009	3671	ISLR	immunoglobulin superfamily containing leucine rich repeat	73.1674	-4.33914	2.94058e-24
ENSG00000168994	221749	PXDC1	PX domain containing 1	450.816	1.15878	3.18524e-24
ENSG00000185043	10519	CIB1	calcium and integrin binding 1	1077.34	0.986358	3.23473e-24
ENSG00000144674	2803	GOLGA4	golgin A4	3893.89	1.08678	3.35531e-24
ENSG00000187134	1645	AKR1C1	aldo-keto reductase family 1 member C1	426.901	4.26489	3.36117e-24
ENSG00000153214	84910	TMEM87B	transmembrane protein 87B	371.053	1.23727	3.4794e-24
ENSG00000106537	27075	TSPAN13	tetraspanin 13	853.513	0.84572	3.60719e-24
ENSG00000153714	286343	LURAP1L	leucine rich adaptor protein 1 like	546.747	2.84131	3.73523e-24
ENSG00000135069	29968	PSAT1	phosphoserine aminotransferase 1	3077	2.93654	3.9291e-24
ENSG00000151726	2180	ACSL1	acyl-CoA synthetase long-chain family member 1	878.285	0.894137	4.17884e-24
ENSG00000176871	55884	WSB2	WD repeat and SOCS box containing 2	2981.62	-0.8798	4.17884e-24
ENSG00000120647	84318	CCDC77	coiled-coil domain containing 77	175.752	-1.63336	4.28264e-24
ENSG00000112419	9749	PHACTR2	phosphatase and actin regulator 2	773.324	1.11398	4.31829e-24
ENSG00000173918	114897	C1QTNF1	C1q and TNF related 1	441.024	-1.59455	5.01356e-24
ENSG00000076604	9618	TRAF4	TNF receptor associated factor 4	634.157	-1.09907	5.03638e-24
ENSG00000115520	80219	COQ10B	coenzyme Q10B	497.366	1.09501	5.13162e-24
ENSG00000167889	146664	MGAT5B	mannosyl (alpha-1,6-)-glycoprotein beta-1,6-N-acetyl-glucosaminyltransferase, isozyme B	339.112	-1.29694	5.28383e-24
ENSG00000137760	91801	ALKBH8	alkB homolog 8, tRNA methyltransferase	507.965	-1.00112	5.42145e-24
ENSG00000011021	1185	CLCN6	chloride voltage-gated channel 6	396.408	1.38835	5.48682e-24
ENSG00000215717	56900	TMEM167B	transmembrane protein 167B	734.666	0.890656	5.76051e-24
ENSG00000067208	7813	EVI5	ecotropic viral integration site 5	695.561	1.12002	5.93312e-24
ENSG00000112081	6428	SRSF3	serine and arginine rich splicing factor 3	4374.27	-0.640079	6.01498e-24
ENSG00000137831	55075	UACA	uveal autoantigen with coiled-coil domains and ankyrin repeats	1168.04	-0.817976	6.21803e-24
ENSG00000115944	9167	COX7A2L	cytochrome c oxidase subunit 7A2 like	1567.91	0.955229	6.32638e-24
ENSG00000170689	3219	HOXB9	homeobox B9	744.663	3.44501	6.37641e-24
ENSG00000134532	6660	SOX5	SRY-box 5	147.311	-1.84725	6.65282e-24
ENSG00000138131	84171	LOXL4	lysyl oxidase like 4	344.861	-1.56375	7.27161e-24
ENSG00000077147	56889	TM9SF3	transmembrane 9 superfamily member 3	6227.32	0.632751	7.72467e-24
ENSG00000158109	127262	TPRG1L	tumor protein p63 regulated 1 like	498.276	1.10646	7.76866e-24
ENSG00000141378	51651	PTRH2	peptidyl-tRNA hydrolase 2	355.602	1.18206	8.15648e-24
ENSG00000187741	2175	FANCA	Fanconi anemia complementation group A	444.522	-1.14662	8.38276e-24
ENSG00000116001	7072	TIA1	TIA1 cytotoxic granule associated RNA binding protein	1243.59	-0.759502	8.63288e-24
ENSG00000101577	9663	LPIN2	lipin 2	775.223	1.02275	9.04836e-24
ENSG00000095002	4436	MSH2	mutS homolog 2	822.164	-0.915691	1.00504e-23
ENSG00000165271	65083	NOL6	nucleolar protein 6	1503.01	0.739081	1.02394e-23
ENSG00000087245	4313	MMP2	matrix metallopeptidase 2	4909.44	-1.01801	1.02469e-23
ENSG00000031081	57514	ARHGAP31	Rho GTPase activating protein 31	413.403	-1.20439	1.07597e-23
ENSG00000132561	4147	MATN2	matrilin 2	93.5893	-2.90367	1.09424e-23
ENSG00000143390	5993	RFX5	regulatory factor X5	535.397	-1.06681	1.13139e-23
ENSG00000065060	54887	UHRF1BP1	UHRF1 binding protein 1	798.261	1.27797	1.14208e-23
ENSG00000133398	84246	MED10	mediator complex subunit 10	564.635	1.29848	1.15419e-23
ENSG00000179119	144108	SPTY2D1	SPT2 chromatin protein domain containing 1	449.275	1.07646	1.15419e-23
ENSG00000139174	144165	PRICKLE1	prickle planar cell polarity protein 1	527.174	-1.34427	1.20407e-23
ENSG00000074527	59277	NTN4	netrin 4	658.089	-1.26173	1.39003e-23
ENSG00000137404	11270	NRM	nurim (nuclear envelope membrane protein)	342.3	-1.32465	1.39324e-23
ENSG00000169689	201254	CENPX	centromere protein X	658.394	-1.33847	1.43101e-23
ENSG00000103495	4150	MAZ	MYC associated zinc finger protein	583.763	-1.09295	1.5376e-23
ENSG00000023608	6617	SNAPC1	small nuclear RNA activating complex polypeptide 1	406.235	1.23169	1.5447e-23
ENSG00000130749	23211	ZC3H4	zinc finger CCCH-type containing 4	745.605	-0.934767	1.57539e-23
ENSG00000185340	10634	GAS2L1	growth arrest specific 2 like 1	467.088	-1.42759	1.58531e-23
ENSG00000180776	253832	ZDHHC20	zinc finger DHHC-type containing 20	1354.27	-0.777263	1.70035e-23
ENSG00000113070	1839	HBEGF	heparin binding EGF like growth factor	133.347	1.87101	1.76846e-23
ENSG00000198860	116461	TSEN15	tRNA splicing endonuclease subunit 15	786.704	0.965143	1.77796e-23
ENSG00000101255	57761	TRIB3	tribbles pseudokinase 3	2718.05	4.15265	1.87065e-23
ENSG00000134333	3939	LDHA	lactate dehydrogenase A	310.033	-1.43296	2.02913e-23
ENSG00000250510	27239	GPR162	G protein-coupled receptor 162	110.78	-2.26784	2.12969e-23
ENSG00000080298	5991	RFX3	regulatory factor X3	422.619	-1.11913	2.59272e-23
ENSG00000150760	1793	DOCK1	dedicator of cytokinesis 1	1155.59	-0.760296	2.6731e-23
ENSG00000112343	10475	TRIM38	tripartite motif containing 38	459.768	1.13565	2.70578e-23
ENSG00000034053	321	APBA2	amyloid beta precursor protein binding family A member 2	683.475	-1.10595	2.71331e-23
ENSG00000198700	55705	IPO9	importin 9	2485.77	-0.691877	2.98887e-23
ENSG00000059728	4084	MXD1	MAX dimerization protein 1	385.777	3.50324	3.06624e-23
ENSG00000167513	81620	CDT1	chromatin licensing and DNA replication factor 1	481.325	-1.45092	3.21396e-23
ENSG00000145882	78991	PCYOX1L	prenylcysteine oxidase 1 like	208.157	-1.60142	3.26395e-23
ENSG00000025039	58528	RRAGD	Ras related GTP binding D	715.395	0.984017	3.65791e-23
ENSG00000210082	4550	RNR2	l-rRNA	76984.7	0.869894	3.69077e-23
ENSG00000130517	54858	PGPEP1	pyroglutamyl-peptidase I	987.574	0.766703	3.83634e-23
ENSG00000128607	23008	KLHDC10	kelch domain containing 10	1363.42	0.820544	4.01891e-23
ENSG00000078114	10529	NEBL	nebulette	279.953	1.50997	4.27116e-23
ENSG00000101367	22919	MAPRE1	microtubule associated protein RP/EB family member 1	3106.72	-0.684728	4.34211e-23
ENSG00000097046	8317	CDC7	cell division cycle 7	257.557	-1.4146	4.41338e-23
ENSG00000178202	143888	KDELC2	KDEL motif containing 2	1307.2	-0.724089	4.42872e-23
ENSG00000058056	8975	USP13	ubiquitin specific peptidase 13 (isopeptidase T-3)	449.988	-1.0782	4.44328e-23
ENSG00000121774	10657	KHDRBS1	KH RNA binding domain containing, signal transduction associated 1	3594.19	-0.716916	4.95371e-23
ENSG00000125630	84172	POLR1B	RNA polymerase I subunit B	592.291	1.00882	5.05834e-23
ENSG00000117394	6513	SLC2A1	solute carrier family 2 member 1	7383.09	-0.87897	5.11795e-23
ENSG00000050820	9564	BCAR1	BCAR1, Cas family scaffolding protein	1749.03	-0.819155	5.43998e-23
ENSG00000117525	2152	F3	coagulation factor III, tissue factor	204.361	1.39024	5.70802e-23
ENSG00000049130	4254	KITLG	KIT ligand	431.229	3.54387	5.74072e-23
ENSG00000105767	199731	CADM4	cell adhesion molecule 4	392.58	-1.39299	5.88525e-23
ENSG00000240230	90639	COX19	COX19, cytochrome c oxidase assembly factor	242.07	1.35312	6.01256e-23
ENSG00000133639	694	BTG1	BTG anti-proliferation factor 1	984.421	1.027	6.55654e-23
ENSG00000167081	5090	PBX3	PBX homeobox 3	350.13	-1.16791	6.60827e-23
ENSG00000197976	8227	AKAP17A	A-kinase anchoring protein 17A	960.987	0.870726	7.27869e-23
ENSG00000037474	54888	NSUN2	NOP2/Sun RNA methyltransferase family member 2	1411.85	0.741863	7.55063e-23
ENSG00000014138	23649	POLA2	DNA polymerase alpha 2, accessory subunit	342.641	-1.37931	8.00446e-23
ENSG00000203805	196051	PLPP4	phospholipid phosphatase 4	291.478	-1.36688	8.01039e-23
ENSG00000104889	10535	RNASEH2A	ribonuclease H2 subunit A	756.899	-1.49305	8.55079e-23
ENSG00000112576	896	CCND3	cyclin D3	1345.68	-0.980429	8.6477e-23
ENSG00000116285	54206	ERRFI1	ERBB receptor feedback inhibitor 1	7038.19	-0.723438	8.94528e-23
ENSG00000115145	10254	STAM2	signal transducing adaptor molecule 2	579.034	1.0476	8.95914e-23
ENSG00000048052	9734	HDAC9	histone deacetylase 9	2202.35	0.967652	9.08557e-23
ENSG00000168701	29100	TMEM208	transmembrane protein 208	516.099	1.09316	9.1971e-23
ENSG00000068971	5526	PPP2R5B	protein phosphatase 2 regulatory subunit B'beta	301.447	1.30493	9.33828e-23
ENSG00000174903	81876	RAB1B	RAB1B, member RAS oncogene family	998.299	-1.00616	9.45525e-23
ENSG00000153250	5937	RBMS1	RNA binding motif single stranded interacting protein 1	858.716	-0.816346	9.57205e-23
ENSG00000197261	135398	C6orf141	chromosome 6 open reading frame 141	473.945	1.56629	9.80262e-23
ENSG00000092847	26523	AGO1	argonaute 1, RISC catalytic component	1638.96	-0.874611	1.07211e-22
ENSG00000101417	11264	PXMP4	peroxisomal membrane protein 4	196.229	-1.74008	1.0883e-22
ENSG00000104833	10382	TUBB4A	tubulin beta 4A class IVa	329.153	-1.24339	1.10974e-22
ENSG00000157693	203197	TMEM268	transmembrane protein 268	439.478	1.25188	1.15069e-22
ENSG00000067177	5255	PHKA1	phosphorylase kinase regulatory subunit alpha 1	419.616	0.985126	1.28535e-22
ENSG00000187676	145173	B3GLCT	beta 3-glucosyltransferase	433.423	-1.16039	1.3141e-22
ENSG00000137834	4091	SMAD6	SMAD family member 6	240.468	-1.42894	1.34811e-22
ENSG00000186187	84937	ZNRF1	zinc and ring finger 1	412.902	-1.11628	1.35963e-22
ENSG00000123094	11228	RASSF8	Ras association domain family member 8	991.303	1.2343	1.57265e-22
ENSG00000115677	3069	HDLBP	high density lipoprotein binding protein	9179.23	0.552576	1.5926e-22
ENSG00000102100	7355	SLC35A2	solute carrier family 35 member A2	741.606	1.03952	1.74091e-22
ENSG00000181722	26137	ZBTB20	zinc finger and BTB domain containing 20	407.622	-1.37979	1.7618e-22
ENSG00000134574	1643	DDB2	damage specific DNA binding protein 2	289.497	-1.32419	1.79206e-22
ENSG00000144040	94097	SFXN5	sideroflexin 5	376.36	-1.13632	1.87682e-22
ENSG00000169359	9197	SLC33A1	solute carrier family 33 member 1	621.28	1.20859	1.88783e-22
ENSG00000035862	7077	TIMP2	TIMP metallopeptidase inhibitor 2	3871.3	-0.794494	1.90632e-22
ENSG00000184178	152579	SCFD2	sec1 family domain containing 2	673.417	0.943104	1.90992e-22
ENSG00000117597	27042	DIEXF	digestive organ expansion factor homolog (zebrafish)	499.697	1.06472	1.9848e-22
ENSG00000134138	4212	MEIS2	Meis homeobox 2	539.583	-0.93674	2.01751e-22
ENSG00000154845	9989	PPP4R1	protein phosphatase 4 regulatory subunit 1	2262.47	-0.633117	2.07157e-22
ENSG00000174442	55055	ZWILCH	zwilch kinetochore protein	857.256	-0.86575	2.16623e-22
ENSG00000198625	4194	MDM4	MDM4, p53 regulator	574.284	1.39862	2.43905e-22
ENSG00000163644	152926	PPM1K	protein phosphatase, Mg2+/Mn2+ dependent 1K	295.038	1.36095	2.68352e-22
ENSG00000105829	10282	BET1	Bet1 golgi vesicular membrane trafficking protein	575.952	1.0069	2.8549e-22
ENSG00000118873	25782	RAB3GAP2	RAB3 GTPase activating non-catalytic protein subunit 2	1084.12	0.975808	2.9051e-22
ENSG00000206053	90861	JPT2	Jupiter microtubule associated homolog 2	1211.95	-0.788953	2.97535e-22
ENSG00000100749	7443	VRK1	vaccinia related kinase 1	249.204	-1.36565	3.04201e-22
ENSG00000163683	201895	SMIM14	small integral membrane protein 14	1053.74	0.897735	3.05861e-22
ENSG00000161692	80174	DBF4B	DBF4 zinc finger B	280.715	-1.29817	3.09869e-22
ENSG00000092421	57556	SEMA6A	semaphorin 6A	100.857	-2.64417	3.63166e-22
ENSG00000168487	649	BMP1	bone morphogenetic protein 1	1243.75	-0.923957	3.63166e-22
ENSG00000182809	1397	CRIP2	cysteine rich protein 2	295.046	-1.7961	3.80021e-22
ENSG00000100292	3162	HMOX1	heme oxygenase 1	1655.53	4.16155	4.00688e-22
ENSG00000138078	9581	PREPL	prolyl endopeptidase-like	1009.03	1.1252	4.01196e-22
ENSG00000235823	NA	NA	NA	255.589	-1.39183	4.26425e-22
ENSG00000131370	9467	SH3BP5	SH3 domain binding protein 5	269.166	-1.6147	4.35914e-22
ENSG00000117395	10969	EBNA1BP2	EBNA1 binding protein 2	1554.55	0.848051	4.40154e-22
ENSG00000081026	260425	MAGI3	membrane associated guanylate kinase, WW and PDZ domain containing 3	494.979	-1.11741	4.77122e-22
ENSG00000157557	2114	ETS2	ETS proto-oncogene 2, transcription factor	300.661	1.58758	4.84997e-22
ENSG00000235109	64288	ZSCAN31	zinc finger and SCAN domain containing 31	402.485	-1.24812	4.95287e-22
ENSG00000137221	93643	TJAP1	tight junction associated protein 1	571.156	1.11912	5.22537e-22
ENSG00000134247	5738	PTGFRN	prostaglandin F2 receptor inhibitor	2432.55	-0.770587	5.2362e-22
ENSG00000235387	158376	SPAAR	small regulatory polypeptide of amino acid response	56.618	-3.59638	5.43885e-22
ENSG00000148730	1979	EIF4EBP2	eukaryotic translation initiation factor 4E binding protein 2	2283.51	-0.620417	5.50269e-22
ENSG00000163902	6184	RPN1	ribophorin I	4401.74	0.639771	5.51206e-22
ENSG00000072071	22859	ADGRL1	adhesion G protein-coupled receptor L1	845.826	-0.860916	5.80587e-22
ENSG00000164949	2669	GEM	GTP binding protein overexpressed in skeletal muscle	364.205	1.46428	5.84803e-22
ENSG00000163704	285368	PRRT3	proline rich transmembrane protein 3	177.341	-1.78314	5.93041e-22
ENSG00000067798	89795	NAV3	neuron navigator 3	111.153	2.90804	6.13038e-22
ENSG00000205336	9289	ADGRG1	adhesion G protein-coupled receptor G1	1849.36	-0.870345	6.77873e-22
ENSG00000106948	80709	AKNA	AT-hook transcription factor	369.737	3.05178	6.93016e-22
ENSG00000165501	122769	LRR1	leucine rich repeat protein 1	230.16	-1.47956	7.00803e-22
ENSG00000183814	286826	LIN9	lin-9 DREAM MuvB core complex component	220.152	-1.43646	7.13236e-22
ENSG00000123975	1164	CKS2	CDC28 protein kinase regulatory subunit 2	637.959	-1.08938	7.19591e-22
ENSG00000175471	79772	MCTP1	multiple C2 and transmembrane domain containing 1	145.181	2.14137	8.15888e-22
ENSG00000022267	2273	FHL1	four and a half LIM domains 1	1157.81	0.836222	8.37115e-22
ENSG00000156531	84295	PHF6	PHD finger protein 6	1355.85	-0.836998	9.3774e-22
ENSG00000196505	54834	GDAP2	ganglioside induced differentiation associated protein 2	621.189	0.958264	9.67665e-22
ENSG00000113448	5144	PDE4D	phosphodiesterase 4D	261.408	3.45452	1.04771e-21
ENSG00000138449	30061	SLC40A1	solute carrier family 40 member 1	81.216	-2.25422	1.18111e-21
ENSG00000270231	728841	NBPF8	NBPF member 8	424.694	1.43055	1.2096e-21
ENSG00000084731	3797	KIF3C	kinesin family member 3C	682.178	-1.02434	1.21821e-21
ENSG00000109572	1182	CLCN3	chloride voltage-gated channel 3	2782.39	0.776548	1.24458e-21
ENSG00000051341	10721	POLQ	DNA polymerase theta	283.204	-1.45576	1.24856e-21
ENSG00000177602	83903	GSG2	germ cell associated 2, haspin	178.961	-1.54634	1.25292e-21
ENSG00000177192	80324	PUS1	pseudouridylate synthase 1	271.983	1.32793	1.26655e-21
ENSG00000087510	7022	TFAP2C	transcription factor AP-2 gamma	602.118	-0.912407	1.32644e-21
ENSG00000187531	51547	SIRT7	sirtuin 7	450.071	1.05582	1.327e-21
ENSG00000166845	162681	C18orf54	chromosome 18 open reading frame 54	160.883	-1.68193	1.38315e-21
ENSG00000139971	145407	C14orf37	chromosome 14 open reading frame 37	161.795	-1.87975	1.4025e-21
ENSG00000136758	10730	YME1L1	YME1 like 1 ATPase	3026.79	0.625384	1.40983e-21
ENSG00000224531	221710	SMIM13	small integral membrane protein 13	1170.62	-0.768485	1.44706e-21
ENSG00000105880	1749	DLX5	distal-less homeobox 5	78.6147	-2.54558	1.51006e-21
ENSG00000164933	81034	SLC25A32	solute carrier family 25 member 32	603.237	0.99174	1.51006e-21
ENSG00000147454	51312	SLC25A37	solute carrier family 25 member 37	661.717	1.13938	1.52596e-21
ENSG00000135387	4076	CAPRIN1	cell cycle associated protein 1	5638.43	-0.552085	1.61951e-21
ENSG00000154803	201163	FLCN	folliculin	507.782	1.1225	1.69694e-21
ENSG00000130513	9518	GDF15	growth differentiation factor 15	2297.86	5.32907	1.75074e-21
ENSG00000116062	2956	MSH6	mutS homolog 6	1461.6	-0.698804	1.7871e-21
ENSG00000172071	9451	EIF2AK3	eukaryotic translation initiation factor 2 alpha kinase 3	553.986	1.26372	1.86941e-21
ENSG00000150782	3606	IL18	interleukin 18	1263.09	-0.729504	2.0576e-21
ENSG00000197461	5154	PDGFA	platelet derived growth factor subunit A	341.332	1.19495	2.1394e-21
ENSG00000058668	493	ATP2B4	ATPase plasma membrane Ca2+ transporting 4	2122	-0.819602	2.16315e-21
ENSG00000161618	126133	ALDH16A1	aldehyde dehydrogenase 16 family member A1	729.584	-0.929008	2.17693e-21
ENSG00000181523	6448	SGSH	N-sulfoglucosamine sulfohydrolase	294.093	1.39246	2.36165e-21
ENSG00000121858	8743	TNFSF10	TNF superfamily member 10	54.9137	-3.8085	2.40528e-21
ENSG00000111581	57122	NUP107	nucleoporin 107	728.573	-0.846308	2.46844e-21
ENSG00000144711	9922	IQSEC1	IQ motif and Sec7 domain 1	673.773	-1.03661	2.51338e-21
ENSG00000180198	1104	RCC1	regulator of chromosome condensation 1	921.96	-0.851883	2.52979e-21
ENSG00000171132	5581	PRKCE	protein kinase C epsilon	267.301	1.30189	2.66017e-21
ENSG00000136378	11173	ADAMTS7	ADAM metallopeptidase with thrombospondin type 1 motif 7	98.1725	-2.16357	2.7089e-21
ENSG00000185046	56899	ANKS1B	ankyrin repeat and sterile alpha motif domain containing 1B	92.6926	-2.27502	2.94353e-21
ENSG00000103769	8766	RAB11A	RAB11A, member RAS oncogene family	2313.71	-0.804982	3.01162e-21
ENSG00000163808	56992	KIF15	kinesin family member 15	228.324	-1.51125	3.10801e-21
ENSG00000263001	2969	GTF2I	general transcription factor IIi	582.664	-0.8706	3.28476e-21
ENSG00000170873	9788	MTSS1	MTSS1, I-BAR domain containing	133.474	-2.0287	3.40136e-21
ENSG00000196756	388796	SNHG17	small nucleolar RNA host gene 17	453.34	1.00835	3.40136e-21
ENSG00000147119	56548	CHST7	carbohydrate sulfotransferase 7	268.057	-1.31289	3.67762e-21
ENSG00000038427	1462	VCAN	versican	2362.78	-1.09833	3.7459e-21
ENSG00000121644	51029	DESI2	desumoylating isopeptidase 2	1260.74	0.69591	4.18299e-21
ENSG00000184900	6612	SUMO3	small ubiquitin-like modifier 3	1373.13	-0.871019	4.24426e-21
ENSG00000141867	23476	BRD4	bromodomain containing 4	1685.84	0.689668	4.28954e-21
ENSG00000090971	57106	NAT14	N-acetyltransferase 14 (putative)	493.644	-1.19694	4.4025e-21
ENSG00000101310	10483	SEC23B	Sec23 homolog B, coat complex II component	1551.66	0.704898	4.54054e-21
ENSG00000089154	10985	GCN1	GCN1, eIF2 alpha kinase activator homolog	2176.55	0.864248	4.56625e-21
ENSG00000107404	1855	DVL1	dishevelled segment polarity protein 1	1059.2	0.829311	4.62733e-21
ENSG00000039560	26064	RAI14	retinoic acid induced 14	2388.55	-0.832335	4.63141e-21
ENSG00000150967	23457	ABCB9	ATP binding cassette subfamily B member 9	176.662	-1.52913	5.03887e-21
ENSG00000147065	4478	MSN	moesin	12559.2	-0.594753	5.08608e-21
ENSG00000176170	8877	SPHK1	sphingosine kinase 1	176.454	1.59695	5.21129e-21
ENSG00000103647	10391	CORO2B	coronin 2B	338.65	1.21073	5.86652e-21
ENSG00000171067	53838	C11orf24	chromosome 11 open reading frame 24	542.472	0.920166	5.94999e-21
ENSG00000106052	8887	TAX1BP1	Tax1 binding protein 1	3845.19	0.682263	6.01242e-21
ENSG00000105135	10994	ILVBL	ilvB acetolactate synthase like	1061.92	0.911833	6.01274e-21
ENSG00000154359	91694	LONRF1	LON peptidase N-terminal domain and ring finger 1	269.241	1.34935	6.23285e-21
ENSG00000175305	9134	CCNE2	cyclin E2	103.147	-2.2594	6.28988e-21
ENSG00000107731	219699	UNC5B	unc-5 netrin receptor B	940.319	0.890902	6.34509e-21
ENSG00000168913	375704	ENHO	energy homeostasis associated	60.4721	-3.56521	6.56537e-21
ENSG00000184009	71	ACTG1	actin gamma 1	59897	-1.09935	6.60122e-21
ENSG00000114423	868	CBLB	Cbl proto-oncogene B	172.841	1.69922	7.07978e-21
ENSG00000175592	8061	FOSL1	FOS like 1, AP-1 transcription factor subunit	482.038	1.05497	7.28067e-21
ENSG00000172840	57546	PDP2	pyruvate dehyrogenase phosphatase catalytic subunit 2	408.493	1.04405	7.58748e-21
ENSG00000174684	11041	B4GAT1	beta-1,4-glucuronyltransferase 1	282.982	-1.27375	7.67565e-21
ENSG00000186594	84981	MIR22HG	MIR22 host gene	305.63	1.85241	7.67565e-21
ENSG00000197043	309	ANXA6	annexin A6	1311.7	-0.991236	7.96359e-21
ENSG00000136261	28969	BZW2	basic leucine zipper and W2 domains 2	1102.4	-0.811732	8.37172e-21
ENSG00000108852	4355	MPP2	membrane palmitoylated protein 2	221.446	-1.59535	8.57666e-21
ENSG00000118495	5325	PLAGL1	PLAG1 like zinc finger 1	601.729	1.37906	9.10335e-21
ENSG00000165195	5277	PIGA	phosphatidylinositol glycan anchor biosynthesis class A	513.625	1.06689	9.10925e-21
ENSG00000102401	51566	ARMCX3	armadillo repeat containing, X-linked 3	1200.84	0.966371	9.1335e-21
ENSG00000102054	5931	RBBP7	RB binding protein 7, chromatin remodeling factor	3247.36	-0.688393	9.5699e-21
ENSG00000172379	9915	ARNT2	aryl hydrocarbon receptor nuclear translocator 2	663.309	-1.04431	9.69466e-21
ENSG00000125520	56731	SLC2A4RG	SLC2A4 regulator	723.643	-1.13907	1.02584e-20
ENSG00000074842	56005	MYDGF	myeloid derived growth factor	2496.27	0.818373	1.07274e-20
ENSG00000155975	137492	VPS37A	VPS37A, ESCRT-I subunit	608.888	0.875517	1.08454e-20
ENSG00000120217	29126	CD274	CD274 molecule	320.349	1.23448	1.08707e-20
ENSG00000105401	11140	CDC37	cell division cycle 37	1470.04	0.741628	1.10103e-20
ENSG00000083520	22894	DIS3	DIS3 homolog, exosome endoribonuclease and 3'-5' exoribonuclease	1009.55	0.88161	1.10945e-20
ENSG00000139269	83729	INHBE	inhibin beta E subunit	37.5281	5.27954	1.16034e-20
ENSG00000158321	26053	AUTS2	AUTS2, activator of transcription and developmental regulator	1071.87	-0.840209	1.21877e-20
ENSG00000180801	79642	ARSJ	arylsulfatase family member J	1135.66	-0.947069	1.29868e-20
ENSG00000173540	29925	GMPPB	GDP-mannose pyrophosphorylase B	596.734	0.922058	1.30816e-20
ENSG00000054392	55733	HHAT	hedgehog acyltransferase	197.444	-1.5926	1.33428e-20
ENSG00000136982	79075	DSCC1	DNA replication and sister chromatid cohesion 1	156.143	-1.56969	1.36394e-20
ENSG00000128590	4189	DNAJB9	DnaJ heat shock protein family (Hsp40) member B9	717.383	2.6246	1.38921e-20
ENSG00000104522	7264	TSTA3	tissue specific transplantation antigen P35B	598.866	0.873	1.40191e-20
ENSG00000151327	283635	FAM177A1	family with sequence similarity 177 member A1	741.673	0.920681	1.42967e-20
ENSG00000159023	2035	EPB41	erythrocyte membrane protein band 4.1	621.498	0.979637	1.46107e-20
ENSG00000066629	2009	EML1	echinoderm microtubule associated protein like 1	934.55	-0.795877	1.47015e-20
ENSG00000204351	6499	SKIV2L	Ski2 like RNA helicase	1293.88	0.745252	1.567e-20
ENSG00000116138	23341	DNAJC16	DnaJ heat shock protein family (Hsp40) member C16	474.225	0.969593	1.58099e-20
ENSG00000141560	79672	FN3KRP	fructosamine 3 kinase related protein	627.711	-1.17487	1.58099e-20
ENSG00000187514	5757	PTMA	prothymosin, alpha	5084.08	-1.01066	1.58632e-20
ENSG00000077942	2192	FBLN1	fibulin 1	936.704	-0.952182	1.59347e-20
ENSG00000185359	9146	HGS	hepatocyte growth factor-regulated tyrosine kinase substrate	1258.43	0.712554	1.64643e-20
ENSG00000160877	112939	NACC1	nucleus accumbens associated 1	1827.72	-0.80639	1.71675e-20
ENSG00000091844	26575	RGS17	regulator of G-protein signaling 17	104.805	1.79362	1.74724e-20
ENSG00000118496	84085	FBXO30	F-box protein 30	926.677	0.857374	1.927e-20
ENSG00000124422	23326	USP22	ubiquitin specific peptidase 22	4953.17	-0.60691	1.93873e-20
ENSG00000248049	550112	UBA6-AS1	UBA6 antisense RNA 1 (head to head)	184.027	1.56685	1.94615e-20
ENSG00000162512	9672	SDC3	syndecan 3	2826.59	-0.881288	1.95935e-20
ENSG00000144591	29926	GMPPA	GDP-mannose pyrophosphorylase A	606.892	0.854441	1.96649e-20
ENSG00000154277	7345	UCHL1	ubiquitin C-terminal hydrolase L1	11735.7	0.683314	1.98791e-20
ENSG00000101126	23394	ADNP	activity dependent neuroprotector homeobox	1926.63	-0.745121	2.00634e-20
ENSG00000114784	10289	EIF1B	eukaryotic translation initiation factor 1B	645.735	1.24455	2.02611e-20
ENSG00000139354	283431	GAS2L3	growth arrest specific 2 like 3	443.585	-1.06108	2.15476e-20
ENSG00000156345	23552	CDK20	cyclin dependent kinase 20	245.654	1.70043	2.16085e-20
ENSG00000103154	54550	NECAB2	N-terminal EF-hand calcium binding protein 2	37.7148	4.98648	2.3682e-20
ENSG00000173598	11163	NUDT4	nudix hydrolase 4	449.795	-1.04443	2.3682e-20
ENSG00000135045	55071	C9orf40	chromosome 9 open reading frame 40	279.342	-1.41841	2.40579e-20
ENSG00000180488	374986	MIGA1	mitoguardin 1	716.732	0.86834	2.42377e-20
ENSG00000169738	51181	DCXR	dicarbonyl and L-xylulose reductase	960.892	-1.2935	2.46367e-20
ENSG00000163661	5806	PTX3	pentraxin 3	100.096	5.29582	2.49767e-20
ENSG00000116761	1491	CTH	cystathionine gamma-lyase	541.619	4.5606	2.50248e-20
ENSG00000171219	55561	CDC42BPG	CDC42 binding protein kinase gamma	67.4187	-3.71768	2.55813e-20
ENSG00000283154	100505385	IQCJ-SCHIP1	IQCJ-SCHIP1 readthrough	96.2644	-2.24671	2.58975e-20
ENSG00000099246	22931	RAB18	RAB18, member RAS oncogene family	1597.67	0.651595	2.60099e-20
ENSG00000078401	1906	EDN1	endothelin 1	54.3358	-3.30834	2.65834e-20
ENSG00000005469	54677	CROT	carnitine O-octanoyltransferase	316.235	-1.20843	2.92789e-20
ENSG00000147010	30011	SH3KBP1	SH3 domain containing kinase binding protein 1	1377.08	0.709861	2.96414e-20
ENSG00000168958	56947	MFF	mitochondrial fission factor	961.453	0.862884	2.97366e-20
ENSG00000138780	79807	GSTCD	glutathione S-transferase C-terminal domain containing	263.027	-1.18684	2.97668e-20
ENSG00000083937	25978	CHMP2B	charged multivesicular body protein 2B	586.934	0.995142	3.08089e-20
ENSG00000116954	64121	RRAGC	Ras related GTP binding C	548.74	1.03201	3.31943e-20
ENSG00000108587	9527	GOSR1	golgi SNAP receptor complex member 1	1082.15	0.831323	3.36829e-20
ENSG00000130816	1786	DNMT1	DNA methyltransferase 1	1764.38	-0.752974	3.44392e-20
ENSG00000162521	5928	RBBP4	RB binding protein 4, chromatin remodeling factor	2114.95	-0.660149	3.57079e-20
ENSG00000163950	7884	SLBP	stem-loop binding protein	1056.91	-0.804187	3.57079e-20
ENSG00000135414	10220	GDF11	growth differentiation factor 11	278.28	-1.26067	3.70274e-20
ENSG00000249087	148898	ZNF436-AS1	ZNF436 antisense RNA 1	58.8243	-2.87461	3.77098e-20
ENSG00000081041	2920	CXCL2	C-X-C motif chemokine ligand 2	66.9193	3.49366	3.94921e-20
ENSG00000170364	6419	SETMAR	SET domain and mariner transposase fusion gene	201.58	-1.62076	4.05361e-20
ENSG00000204767	100131897	FAM196B	family with sequence similarity 196 member B	234.761	-1.22411	4.12966e-20
ENSG00000077238	3566	IL4R	interleukin 4 receptor	141.157	1.78782	4.15197e-20
ENSG00000125629	51141	INSIG2	insulin induced gene 2	402.739	1.04631	4.20285e-20
ENSG00000101966	331	XIAP	X-linked inhibitor of apoptosis	2035.01	0.77171	4.54294e-20
ENSG00000128245	7533	YWHAH	tyrosine 3-monooxygenase/tryptophan 5-monooxygenase activation protein eta	1764.74	-0.785942	4.71424e-20
ENSG00000104447	7227	TRPS1	transcriptional repressor GATA binding 1	506.414	-0.927935	5.11209e-20
ENSG00000131504	1729	DIAPH1	diaphanous related formin 1	2018.63	-0.660267	5.19138e-20
ENSG00000161547	6427	SRSF2	serine and arginine rich splicing factor 2	2115.96	-0.621448	5.19326e-20
ENSG00000132254	23647	ARFIP2	ADP ribosylation factor interacting protein 2	634.284	0.818011	5.24621e-20
ENSG00000105323	11100	HNRNPUL1	heterogeneous nuclear ribonucleoprotein U like 1	6681.22	-0.624661	5.32632e-20
ENSG00000169180	23214	XPO6	exportin 6	1621.85	0.71045	5.36114e-20
ENSG00000141401	3613	IMPA2	inositol monophosphatase 2	298.674	-1.39272	5.6534e-20
ENSG00000150540	3176	HNMT	histamine N-methyltransferase	235.094	-1.35884	5.76906e-20
ENSG00000163069	6443	SGCB	sarcoglycan beta	1650.28	-0.70765	5.86996e-20
ENSG00000118412	9994	CASP8AP2	caspase 8 associated protein 2	629.356	-0.867096	5.87589e-20
ENSG00000160072	83858	ATAD3B	ATPase family, AAA domain containing 3B	413.769	1.07198	5.96757e-20
ENSG00000180998	283554	GPR137C	G protein-coupled receptor 137C	82.2985	-2.25848	5.98651e-20
ENSG00000075975	23609	MKRN2	makorin ring finger protein 2	1050.27	0.69937	6.13928e-20
ENSG00000174136	285704	RGMB	repulsive guidance molecule family member b	277.923	1.27959	6.30128e-20
ENSG00000063587	10838	ZNF275	zinc finger protein 275	547.186	0.996337	6.30617e-20
ENSG00000165617	51339	DACT1	dishevelled binding antagonist of beta catenin 1	574.619	-1.02345	6.53601e-20
ENSG00000114395	11068	CYB561D2	cytochrome b561 family member D2	394.409	1.16832	6.53858e-20
ENSG00000124198	10564	ARFGEF2	ADP ribosylation factor guanine nucleotide exchange factor 2	1360.15	1.0455	6.5941e-20
ENSG00000113916	604	BCL6	B-cell CLL/lymphoma 6	276.959	1.23126	6.61398e-20
ENSG00000137673	4316	MMP7	matrix metallopeptidase 7	57.9264	-2.9238	6.81768e-20
ENSG00000113391	83989	FAM172A	family with sequence similarity 172 member A	670.887	-0.794428	6.84794e-20
ENSG00000005882	5164	PDK2	pyruvate dehydrogenase kinase 2	176.167	-1.50048	6.98935e-20
ENSG00000173276	49854	ZBTB21	zinc finger and BTB domain containing 21	584.669	1.10042	7.00564e-20
ENSG00000131981	3958	LGALS3	galectin 3	532.464	0.951844	7.04916e-20
ENSG00000104147	11339	OIP5	Opa interacting protein 5	122.069	-1.95008	7.29997e-20
ENSG00000143369	1893	ECM1	extracellular matrix protein 1	270.369	-1.40778	7.38585e-20
ENSG00000198919	9666	DZIP3	DAZ interacting zinc finger protein 3	326.689	-1.1001	7.5783e-20
ENSG00000170876	79188	TMEM43	transmembrane protein 43	1123.75	0.668202	7.95719e-20
ENSG00000138942	91445	RNF185	ring finger protein 185	372.715	1.14318	8.05005e-20
ENSG00000134294	54407	SLC38A2	solute carrier family 38 member 2	4361.52	1.74439	8.10448e-20
ENSG00000103044	3038	HAS3	hyaluronan synthase 3	84.6401	-2.32213	8.69535e-20
ENSG00000257167	100128191	TMPO-AS1	TMPO antisense RNA 1	80.9334	-2.74716	8.90131e-20
ENSG00000070444	4335	MNT	MAX network transcriptional repressor	349.637	1.16813	9.02496e-20
ENSG00000115993	66008	TRAK2	trafficking kinesin protein 2	1226.83	0.806004	9.2772e-20
ENSG00000016391	55349	CHDH	choline dehydrogenase	178.974	-1.62926	9.43895e-20
ENSG00000176208	79915	ATAD5	ATPase family, AAA domain containing 5	250.15	-1.31241	1.03942e-19
ENSG00000130066	6303	SAT1	spermidine/spermine N1-acetyltransferase 1	1848.08	-0.815335	1.05018e-19
ENSG00000079432	23152	CIC	capicua transcriptional repressor	2082.7	-0.778145	1.06825e-19
ENSG00000115414	2335	FN1	fibronectin 1	2703.83	-0.758776	1.06825e-19
ENSG00000125864	631	BFSP1	beaded filament structural protein 1	96.6945	-2.08156	1.08412e-19
ENSG00000106780	1955	MEGF9	multiple EGF like domains 9	343.791	-1.05027	1.10399e-19
ENSG00000132475	3021	H3F3B	H3 histone family member 3B	8315.32	-0.654194	1.11866e-19
ENSG00000049246	8863	PER3	period circadian clock 3	320.31	-1.08029	1.15455e-19
ENSG00000186340	7058	THBS2	thrombospondin 2	425.955	1.0366	1.15672e-19
ENSG00000152558	114908	TMEM123	transmembrane protein 123	2085.13	-0.577148	1.22662e-19
ENSG00000140564	5045	FURIN	furin, paired basic amino acid cleaving enzyme	2733.71	-0.799401	1.25972e-19
ENSG00000183087	2621	GAS6	growth arrest specific 6	323.136	-1.20701	1.28645e-19
ENSG00000065000	8943	AP3D1	adaptor related protein complex 3 delta 1 subunit	3290.68	0.608222	1.29135e-19
ENSG00000110063	28960	DCPS	decapping enzyme, scavenger	507.904	-1.28245	1.29793e-19
ENSG00000006377	1750	DLX6	distal-less homeobox 6	100.578	-2.14179	1.38357e-19
ENSG00000189410	400745	SH2D5	SH2 domain containing 5	40.3736	3.40679	1.38373e-19
ENSG00000172469	79694	MANEA	mannosidase endo-alpha	483.129	-0.921441	1.38512e-19
ENSG00000051180	5888	RAD51	RAD51 recombinase	140.293	-1.7403	1.40353e-19
ENSG00000144354	83879	CDCA7	cell division cycle associated 7	300.495	-1.28169	1.45208e-19
ENSG00000086102	4799	NFX1	nuclear transcription factor, X-box binding 1	862.356	0.78324	1.53421e-19
ENSG00000197565	1288	COL4A6	collagen type IV alpha 6 chain	84.4892	-2.41399	1.53903e-19
ENSG00000164983	157378	TMEM65	transmembrane protein 65	1206.17	-0.744233	1.63818e-19
ENSG00000164045	993	CDC25A	cell division cycle 25A	278.888	-1.4703	1.65753e-19
ENSG00000138336	80312	TET1	tet methylcytosine dioxygenase 1	126.807	-1.8204	1.66402e-19
ENSG00000177084	5426	POLE	DNA polymerase epsilon, catalytic subunit	716.103	-1.18378	1.66402e-19
ENSG00000117528	5825	ABCD3	ATP binding cassette subfamily D member 3	1650.42	-0.641215	1.67266e-19
ENSG00000173214	91749	MFSD4B	major facilitator superfamily domain containing 4B	235.461	1.29775	1.67266e-19
ENSG00000100612	51635	DHRS7	dehydrogenase/reductase 7	470.999	0.942154	1.72956e-19
ENSG00000094975	51430	SUCO	SUN domain containing ossification factor	2511.01	0.893576	1.80749e-19
ENSG00000141556	6904	TBCD	tubulin folding cofactor D	1230.82	-0.772853	1.86265e-19
ENSG00000143321	3068	HDGF	heparin binding growth factor	4201.46	-0.613027	1.98061e-19
ENSG00000104856	5971	RELB	RELB proto-oncogene, NF-kB subunit	251.982	1.27998	1.9867e-19
ENSG00000124831	9208	LRRFIP1	LRR binding FLII interacting protein 1	2167.92	0.705479	2.0136e-19
ENSG00000119669	64207	IRF2BPL	interferon regulatory factor 2 binding protein like	1045.96	-1.02623	2.14964e-19
ENSG00000204178	55219	TMEM57	transmembrane protein 57	611.437	0.907229	2.21203e-19
ENSG00000128944	90417	KNSTRN	kinetochore localized astrin/SPAG5 binding protein	444.814	-1.06036	2.28046e-19
ENSG00000141627	54808	DYM	dymeclin	386.226	1.04841	2.32766e-19
ENSG00000105568	5518	PPP2R1A	protein phosphatase 2 scaffold subunit Aalpha	5275.24	-0.808695	2.34264e-19
ENSG00000196155	25894	PLEKHG4	pleckstrin homology and RhoGEF domain containing G4	93.6956	-2.09939	2.52585e-19
ENSG00000110768	2965	GTF2H1	general transcription factor IIH subunit 1	857.374	0.856151	2.5391e-19
ENSG00000174485	10260	DENND4A	DENN domain containing 4A	601.304	0.852577	2.56004e-19
ENSG00000115758	4953	ODC1	ornithine decarboxylase 1	4169.12	0.64888	2.73324e-19
ENSG00000169439	6383	SDC2	syndecan 2	780.911	-0.934351	2.7692e-19
ENSG00000116815	965	CD58	CD58 molecule	615.871	-0.875625	2.84959e-19
ENSG00000100479	5427	POLE2	DNA polymerase epsilon 2, accessory subunit	128.966	-1.72798	2.98838e-19
ENSG00000165389	171546	SPTSSA	serine palmitoyltransferase small subunit A	1028.11	-0.773225	3.08176e-19
ENSG00000065183	10885	WDR3	WD repeat domain 3	1211.9	0.660172	3.13448e-19
ENSG00000196220	9901	SRGAP3	SLIT-ROBO Rho GTPase activating protein 3	102.021	-2.39885	3.14054e-19
ENSG00000100401	5905	RANGAP1	Ran GTPase activating protein 1	1911.78	-0.714446	3.27627e-19
ENSG00000166900	6809	STX3	syntaxin 3	402.672	1.26427	3.30149e-19
ENSG00000136444	55316	RSAD1	radical S-adenosyl methionine domain containing 1	657.317	0.868999	3.62026e-19
ENSG00000035681	8439	NSMAF	neutral sphingomyelinase activation associated factor	693.471	0.882951	3.69595e-19
ENSG00000182175	56963	RGMA	repulsive guidance molecule family member a	59.2201	-3.24824	3.77335e-19
ENSG00000221926	10626	TRIM16	tripartite motif containing 16	356.071	0.974054	3.83841e-19
ENSG00000114735	51409	HEMK1	HemK methyltransferase family member 1	383.16	1.197	3.85538e-19
ENSG00000184347	6586	SLIT3	slit guidance ligand 3	183.773	-1.43839	4.06572e-19
ENSG00000131351	93323	HAUS8	HAUS augmin like complex subunit 8	221.798	-1.3146	4.10838e-19
ENSG00000235884	100287314	LINC00941	long intergenic non-protein coding RNA 941	77.1249	2.12683	4.16112e-19
ENSG00000168256	28511	NKIRAS2	NFKB inhibitor interacting Ras like 2	1114.85	0.671545	4.27256e-19
ENSG00000198947	1756	DMD	dystrophin	108.358	1.71275	4.283e-19
ENSG00000075702	284403	WDR62	WD repeat domain 62	585.397	-1.11859	4.41962e-19
ENSG00000101158	51497	NELFCD	negative elongation factor complex member C/D	1241.37	-0.742052	4.41962e-19
ENSG00000187325	51616	TAF9B	TATA-box binding protein associated factor 9b	906.422	-0.820734	4.43796e-19
ENSG00000067167	23471	TRAM1	translocation associated membrane protein 1	2927.47	0.619186	4.46909e-19
ENSG00000181026	64782	AEN	apoptosis enhancing nuclease	605.753	0.834504	4.67624e-19
ENSG00000196182	83931	STK40	serine/threonine kinase 40	744.086	0.741123	4.82983e-19
ENSG00000147403	6134	RPL10	ribosomal protein L10	8693.48	0.729461	4.96088e-19
ENSG00000087263	55239	OGFOD1	2-oxoglutarate and iron dependent oxygenase domain containing 1	1041.99	0.689006	4.96783e-19
ENSG00000203485	64423	INF2	inverted formin, FH2 and WH2 domain containing	1128.36	-0.758243	4.97349e-19
ENSG00000183048	1468	SLC25A10	solute carrier family 25 member 10	198.214	-1.9796	5.05428e-19
ENSG00000116871	55700	MAP7D1	MAP7 domain containing 1	3131.12	-0.712263	5.39836e-19
ENSG00000197355	91373	UAP1L1	UDP-N-acetylglucosamine pyrophosphorylase 1 like 1	372.953	1.16299	5.45947e-19
ENSG00000181788	6478	SIAH2	siah E3 ubiquitin protein ligase 2	381.574	1.01518	5.61397e-19
ENSG00000089818	25977	NECAP1	NECAP endocytosis associated 1	384.555	1.00354	6.20419e-19
ENSG00000124767	2739	GLO1	glyoxalase I	3381.81	-0.619566	6.50134e-19
ENSG00000143147	23432	GPR161	G protein-coupled receptor 161	516.824	-0.973093	6.70273e-19
ENSG00000106144	835	CASP2	caspase 2	771.404	-0.841906	6.70781e-19
ENSG00000100626	57452	GALNT16	polypeptide N-acetylgalactosaminyltransferase 16	52.3263	-3.52361	6.79883e-19
ENSG00000213445	6494	SIPA1	signal-induced proliferation-associated 1	159.745	-1.6501	6.85133e-19
ENSG00000125871	92667	MGME1	mitochondrial genome maintenance exonuclease 1	424.746	-1.11316	7.02448e-19
ENSG00000138794	839	CASP6	caspase 6	246.929	-1.44029	7.09876e-19
ENSG00000196262	5478	PPIA	peptidylprolyl isomerase A	9208.76	-0.786942	7.60055e-19
ENSG00000164850	2852	GPER1	G protein-coupled estrogen receptor 1	61.8215	-2.8667	7.83298e-19
ENSG00000092841	4637	MYL6	myosin light chain 6	5537.18	-1.00842	8.23974e-19
ENSG00000100353	8664	EIF3D	eukaryotic translation initiation factor 3 subunit D	2036.28	0.636129	8.25783e-19
ENSG00000173039	5970	RELA	RELA proto-oncogene, NF-kB subunit	949.402	0.708122	8.3139e-19
ENSG00000128510	51200	CPA4	carboxypeptidase A4	242.469	1.64249	8.49906e-19
ENSG00000108588	57003	CCDC47	coiled-coil domain containing 47	2987.55	0.59163	8.65772e-19
ENSG00000109083	90410	IFT20	intraflagellar transport 20	229.812	1.24594	8.70041e-19
ENSG00000168785	10098	TSPAN5	tetraspanin 5	585.721	0.914464	9.21627e-19
ENSG00000139734	81624	DIAPH3	diaphanous related formin 3	580.82	-0.962549	9.38996e-19
ENSG00000081059	6932	TCF7	transcription factor 7 (T-cell specific, HMG-box)	89.51	-2.15002	9.69472e-19
ENSG00000154930	84532	ACSS1	acyl-CoA synthetase short-chain family member 1	153.89	1.62855	9.77402e-19
ENSG00000174996	64837	KLC2	kinesin light chain 2	676.627	0.78417	1.05046e-18
ENSG00000181588	399664	MEX3D	mex-3 RNA binding family member D	805.98	-1.33716	1.09614e-18
ENSG00000172936	4615	MYD88	myeloid differentiation primary response 88	665.375	-0.855455	1.11111e-18
ENSG00000159885	7673	ZNF222	zinc finger protein 222	124.533	1.73083	1.12445e-18
ENSG00000147041	94122	SYTL5	synaptotagmin like 5	613.887	-0.995124	1.12817e-18
ENSG00000121005	83690	CRISPLD1	cysteine rich secretory protein LCCL domain containing 1	81.5425	-2.19231	1.32794e-18
ENSG00000117748	6118	RPA2	replication protein A2	811.121	-0.867469	1.33009e-18
ENSG00000163516	55139	ANKZF1	ankyrin repeat and zinc finger domain containing 1	387.551	1.13556	1.34232e-18
ENSG00000070669	440	ASNS	asparagine synthetase (glutamine-hydrolyzing)	40.5143	3.98706	1.3684e-18
ENSG00000198825	22876	INPP5F	inositol polyphosphate-5-phosphatase F	747.554	-0.84994	1.4194e-18
ENSG00000000460	55732	C1orf112	chromosome 1 open reading frame 112	224.81	-1.3863	1.48156e-18
ENSG00000173950	152002	XXYLT1	xyloside xylosyltransferase 1	341.131	-1.07146	1.51087e-18
ENSG00000136003	23479	ISCU	iron-sulfur cluster assembly enzyme	728.269	0.803317	1.5465e-18
ENSG00000198369	200734	SPRED2	sprouty related EVH1 domain containing 2	768.41	0.775874	1.60271e-18
ENSG00000101166	51012	PRELID3B	PRELI domain containing 3B	866.281	0.783274	1.6144e-18
ENSG00000198855	11153	FICD	FIC domain containing	219.807	1.48297	1.66595e-18
ENSG00000106683	3984	LIMK1	LIM domain kinase 1	1778.81	-0.724191	1.67724e-18
ENSG00000168393	1841	DTYMK	deoxythymidylate kinase	795.929	-0.98278	1.69687e-18
ENSG00000169641	7798	LUZP1	leucine zipper protein 1	771.635	-0.852591	1.69687e-18
ENSG00000115762	55041	PLEKHB2	pleckstrin homology domain containing B2	2588.76	0.551878	1.79728e-18
ENSG00000139496	9818	NUP58	nucleoporin 58	1491.9	0.794832	1.81524e-18
ENSG00000128708	8520	HAT1	histone acetyltransferase 1	1010.03	-0.72919	1.81788e-18
ENSG00000071575	28951	TRIB2	tribbles pseudokinase 2	1457.34	-0.859828	1.90599e-18
ENSG00000079246	7520	XRCC5	X-ray repair cross complementing 5	5087.39	-0.573817	1.99146e-18
ENSG00000134697	29889	GNL2	G protein nucleolar 2	1375.94	0.697038	1.99706e-18
ENSG00000167553	84790	TUBA1C	tubulin alpha 1c	2650.56	-0.837818	2.05678e-18
ENSG00000198729	81706	PPP1R14C	protein phosphatase 1 regulatory inhibitor subunit 14C	621.507	-0.980886	2.1116e-18
ENSG00000164402	23176	2018-09-08	septin 8	1366.91	-0.69455	2.18053e-18
ENSG00000196236	63929	XPNPEP3	X-prolyl aminopeptidase 3	277.067	1.10518	2.2268e-18
ENSG00000185418	123283	TARSL2	threonyl-tRNA synthetase like 2	228.28	1.20727	2.3648e-18
ENSG00000167107	80221	ACSF2	acyl-CoA synthetase family member 2	220.695	-1.28763	2.44118e-18
ENSG00000166012	79101	TAF1D	TATA-box binding protein associated factor, RNA polymerase I subunit D	598.04	1.20307	2.4709e-18
ENSG00000135829	1660	DHX9	DExH-box helicase 9	4574.85	-0.518735	2.53442e-18
ENSG00000164087	25886	POC1A	POC1 centriolar protein A	481.121	-1.01539	2.55703e-18
ENSG00000127948	5447	POR	cytochrome p450 oxidoreductase	1202.88	0.659666	2.57623e-18
ENSG00000140538	4916	NTRK3	neurotrophic receptor tyrosine kinase 3	53.9739	-2.86161	2.62787e-18
ENSG00000073584	6605	SMARCE1	SWI/SNF related, matrix associated, actin dependent regulator of chromatin, subfamily e, member 1	662.163	-0.843062	2.6636e-18
ENSG00000182022	51363	CHST15	carbohydrate sulfotransferase 15	67.561	2.21278	2.74465e-18
ENSG00000122565	11335	CBX3	chromobox 3	4161.36	-0.628444	2.77571e-18
ENSG00000157796	57728	WDR19	WD repeat domain 19	479.802	1.21752	2.80783e-18
ENSG00000128699	94101	ORMDL1	ORMDL sphingolipid biosynthesis regulator 1	667.85	0.850389	2.89088e-18
ENSG00000140598	79631	EFL1	elongation factor like GTPase 1	625.271	0.83861	2.9448e-18
ENSG00000062822	5424	POLD1	DNA polymerase delta 1, catalytic subunit	743.229	-0.946935	2.95216e-18
ENSG00000182054	3418	IDH2	isocitrate dehydrogenase (NADP(+)) 2, mitochondrial	990.988	-1.17073	3.07733e-18
ENSG00000135272	29969	MDFIC	MyoD family inhibitor domain containing	390.749	-1.04863	3.19462e-18
ENSG00000177410	441951	ZFAS1	ZNFX1 antisense RNA 1	488.582	1.01168	3.51089e-18
ENSG00000115183	85461	TANC1	tetratricopeptide repeat, ankyrin repeat and coiled-coil containing 1	826.37	-0.812664	4.20818e-18
ENSG00000132823	51526	OSER1	oxidative stress responsive serine rich 1	575.349	0.865973	4.36834e-18
ENSG00000159131	2618	GART	phosphoribosylglycinamide formyltransferase, phosphoribosylglycinamide synthetase, phosphoribosylaminoimidazole synthetase	1320.78	0.714066	4.37531e-18
ENSG00000204628	10399	RACK1	receptor for activated C kinase 1	14395	0.6756	4.69214e-18
ENSG00000002822	8379	MAD1L1	MAD1 mitotic arrest deficient like 1	623.466	0.920661	4.98939e-18
ENSG00000160469	84446	BRSK1	BR serine/threonine kinase 1	225.092	1.18641	5.09255e-18
ENSG00000091542	54890	ALKBH5	alkB homolog 5, RNA demethylase	2293.95	0.670906	5.1943e-18
ENSG00000213523	10011	SRA1	steroid receptor RNA activator 1	859.743	0.85177	5.25961e-18
ENSG00000114331	23527	ACAP2	ArfGAP with coiled-coil, ankyrin repeat and PH domains 2	1016.97	0.720241	5.33515e-18
ENSG00000226608	NA	NA	NA	89.0668	1.90844	5.37682e-18
ENSG00000188015	6274	S100A3	S100 calcium binding protein A3	58.9947	-2.77239	5.64343e-18
ENSG00000126432	25824	PRDX5	peroxiredoxin 5	1580.51	0.838367	5.68886e-18
ENSG00000104413	54845	ESRP1	epithelial splicing regulatory protein 1	38.7664	5.22304	5.93886e-18
ENSG00000143612	25912	C1orf43	chromosome 1 open reading frame 43	3601.33	0.592113	6.14342e-18
ENSG00000120837	4801	NFYB	nuclear transcription factor Y subunit beta	370.316	-1.0111	6.54695e-18
ENSG00000068438	24140	FTSJ1	FtsJ RNA methyltransferase homolog 1 (E. coli)	1614.33	0.776643	6.60744e-18
ENSG00000113161	3156	HMGCR	3-hydroxy-3-methylglutaryl-CoA reductase	1445.21	-0.680585	6.81541e-18
ENSG00000149636	79980	DSN1	DSN1 homolog, MIS12 kinetochore complex component	527.038	-1.06636	7.05512e-18
ENSG00000095139	372	ARCN1	archain 1	4972.61	0.559712	7.29282e-18
ENSG00000170162	245806	VGLL2	vestigial like family member 2	44.0967	3.44711	7.89886e-18
ENSG00000102595	55757	UGGT2	UDP-glucose glycoprotein glucosyltransferase 2	523.289	1.01315	8.07147e-18
ENSG00000101150	7165	TPD52L2	tumor protein D52 like 2	1783.09	0.690534	8.16818e-18
ENSG00000139613	6601	SMARCC2	SWI/SNF related, matrix associated, actin dependent regulator of chromatin subfamily c member 2	990.472	-0.820128	8.31309e-18
ENSG00000168461	11031	RAB31	RAB31, member RAS oncogene family	2302.04	-0.685181	8.62362e-18
ENSG00000133131	79710	MORC4	MORC family CW-type zinc finger 4	616.844	0.844769	8.68422e-18
ENSG00000106245	8896	BUD31	BUD31 homolog	562.427	0.948344	8.94731e-18
ENSG00000114120	55186	SLC25A36	solute carrier family 25 member 36	802.055	0.852584	9.21868e-18
ENSG00000133083	9201	DCLK1	doublecortin like kinase 1	755.707	-0.968456	9.26998e-18
ENSG00000187601	28986	MAGEH1	MAGE family member H1	296.262	1.271	9.45778e-18
ENSG00000123395	60673	ATG101	autophagy related 101	316.587	1.18224	9.63132e-18
ENSG00000046604	1829	DSG2	desmoglein 2	843.991	0.775747	9.72554e-18
ENSG00000170385	7779	SLC30A1	solute carrier family 30 member 1	632.946	0.881768	9.8463e-18
ENSG00000071859	9130	FAM50A	family with sequence similarity 50 member A	1553.69	0.637752	1.01687e-17
ENSG00000198453	374900	ZNF568	zinc finger protein 568	309.737	0.999223	1.0184e-17
ENSG00000078246	7289	TULP3	tubby like protein 3	561.062	1.03528	1.02062e-17
ENSG00000018408	25937	WWTR1	WW domain containing transcription regulator 1	1305.73	-0.790195	1.15934e-17
ENSG00000171566	5356	PLRG1	pleiotropic regulator 1	1365.61	0.690971	1.18041e-17
ENSG00000052723	80143	SIKE1	suppressor of IKBKE 1	1133.12	0.685856	1.19285e-17
ENSG00000117481	387338	NSUN4	NOP2/Sun RNA methyltransferase family member 4	400.875	0.972589	1.25328e-17
ENSG00000226752	NA	NA	NA	243.159	1.17964	1.2656e-17
ENSG00000181045	284129	SLC26A11	solute carrier family 26 member 11	115.356	1.69434	1.2678e-17
ENSG00000158290	8450	CUL4B	cullin 4B	3622.74	-0.510409	1.28377e-17
ENSG00000178381	90637	ZFAND2A	zinc finger AN1-type containing 2A	232.46	1.27976	1.28377e-17
ENSG00000150893	341640	FREM2	FRAS1 related extracellular matrix protein 2	77.5676	-2.41551	1.30649e-17
ENSG00000077312	6626	SNRPA	small nuclear ribonucleoprotein polypeptide A	789.295	-0.719055	1.31298e-17
ENSG00000095380	54187	NANS	N-acetylneuraminate synthase	482.124	0.923633	1.3374e-17
ENSG00000114268	5210	PFKFB4	6-phosphofructo-2-kinase/fructose-2,6-biphosphatase 4	856.294	-0.871347	1.3374e-17
ENSG00000119280	84886	C1orf198	chromosome 1 open reading frame 198	803.086	-0.895569	1.34563e-17
ENSG00000188766	399473	SPRED3	sprouty related EVH1 domain containing 3	293.562	1.0431	1.44796e-17
ENSG00000130830	4354	MPP1	membrane palmitoylated protein 1	612.22	0.770139	1.54138e-17
ENSG00000107560	22841	RAB11FIP2	RAB11 family interacting protein 2	444.937	0.961945	1.66967e-17
ENSG00000135632	10322	SMYD5	SMYD family member 5	498.302	0.864237	1.68685e-17
ENSG00000104331	54928	IMPAD1	inositol monophosphatase domain containing 1	2537.08	0.586226	1.73386e-17
ENSG00000259518	101929690	LINC01583	long intergenic non-protein coding RNA 1583	37.7623	3.847	1.74712e-17
ENSG00000154133	54538	ROBO4	roundabout guidance receptor 4	59.4674	2.24515	1.81301e-17
ENSG00000188153	1287	COL4A5	collagen type IV alpha 5 chain	383.262	-0.94892	1.85784e-17
ENSG00000175061	125144	LRRC75A-AS1	LRRC75A antisense RNA 1	2540.56	0.714663	1.88942e-17
ENSG00000158246	115572	FAM46B	family with sequence similarity 46 member B	60.8182	-2.92849	1.96993e-17
ENSG00000138795	51176	LEF1	lymphoid enhancer binding factor 1	195.386	-1.39558	2.07466e-17
ENSG00000251003	NA	NA	NA	141.679	1.75458	2.13875e-17
ENSG00000073146	54456	MOV10L1	Mov10 RISC complex RNA helicase like 1	45.2369	3.27465	2.22989e-17
ENSG00000165915	91252	SLC39A13	solute carrier family 39 member 13	963.701	0.689511	2.30356e-17
ENSG00000148019	84131	CEP78	centrosomal protein 78	661.673	-0.79557	2.4206e-17
ENSG00000070087	5217	PFN2	profilin 2	2778.04	-0.754496	2.43942e-17
ENSG00000189159	51155	JPT1	Jupiter microtubule associated homolog 1	2013.16	-0.945522	2.43942e-17
ENSG00000184007	8073	PTP4A2	protein tyrosine phosphatase type IVA, member 2	3454.17	0.645302	2.46419e-17
ENSG00000204713	5987	TRIM27	tripartite motif containing 27	1448.3	0.628633	2.50095e-17
ENSG00000244026	692099	FAM86DP	family with sequence similarity 86 member D, pseudogene	89.6685	1.76481	2.61972e-17
ENSG00000101945	6839	SUV39H1	suppressor of variegation 3-9 homolog 1	286.158	-1.46477	2.68253e-17
ENSG00000134759	55250	ELP2	elongator acetyltransferase complex subunit 2	410.065	0.965683	2.74586e-17
ENSG00000167657	1613	DAPK3	death associated protein kinase 3	1567.16	0.640674	2.87208e-17
ENSG00000109814	7358	UGDH	UDP-glucose 6-dehydrogenase	1025.15	0.843251	2.96052e-17
ENSG00000113194	23197	FAF2	Fas associated factor family member 2	1761.38	0.637051	3.09588e-17
ENSG00000108691	6347	CCL2	C-C motif chemokine ligand 2	43.9749	-3.13943	3.13046e-17
ENSG00000122694	152007	GLIPR2	GLI pathogenesis related 2	613.626	-0.813541	3.20178e-17
ENSG00000178776	389336	C5orf46	chromosome 5 open reading frame 46	190.259	-1.58229	3.59372e-17
ENSG00000166311	6609	SMPD1	sphingomyelin phosphodiesterase 1	718.824	-0.816557	3.6087e-17
ENSG00000128342	3976	LIF	LIF, interleukin 6 family cytokine	378.802	-1.27953	3.65501e-17
ENSG00000118655	64858	DCLRE1B	DNA cross-link repair 1B	346.625	-1.16424	3.77661e-17
ENSG00000198176	7027	TFDP1	transcription factor Dp-1	1491.04	-0.759292	3.803e-17
ENSG00000185344	23545	ATP6V0A2	ATPase H+ transporting V0 subunit a2	499.238	0.896263	4.14111e-17
ENSG00000101843	5716	PSMD10	proteasome 26S subunit, non-ATPase 10	1612.29	-0.70115	4.66527e-17
ENSG00000117602	11123	RCAN3	RCAN family member 3	605.136	-0.875057	4.69478e-17
ENSG00000120942	29914	UBIAD1	UbiA prenyltransferase domain containing 1	546.323	0.830279	4.74125e-17
ENSG00000088538	1795	DOCK3	dedicator of cytokinesis 3	328.66	1.40577	5.04581e-17
ENSG00000133302	84250	SLF1	SMC5-SMC6 complex localization factor 1	272.631	-1.14842	5.05853e-17
ENSG00000066651	60487	TRMT11	tRNA methyltransferase 11 homolog	256.384	1.04371	5.54997e-17
ENSG00000143776	8476	CDC42BPA	CDC42 binding protein kinase alpha	1953.53	0.879919	5.56639e-17
ENSG00000166086	83700	JAM3	junctional adhesion molecule 3	1007	-0.770996	5.83426e-17
ENSG00000137821	54839	LRRC49	leucine rich repeat containing 49	249.56	1.30941	6.00532e-17
ENSG00000103064	9057	SLC7A6	solute carrier family 7 member 6	267.298	1.26956	6.08653e-17
ENSG00000148843	22984	PDCD11	programmed cell death 11	1097.54	0.849812	6.08653e-17
ENSG00000089220	5037	PEBP1	phosphatidylethanolamine binding protein 1	3003.89	-0.781778	6.6119e-17
ENSG00000103642	114294	LACTB	lactamase beta	444.48	0.91866	6.88346e-17
ENSG00000004487	23028	KDM1A	lysine demethylase 1A	2075.41	-0.585586	6.93468e-17
ENSG00000121749	64786	TBC1D15	TBC1 domain family member 15	683.674	0.774087	7.22434e-17
ENSG00000125844	6238	RRBP1	ribosome binding protein 1	3586.86	0.660026	7.46654e-17
ENSG00000123219	64105	CENPK	centromere protein K	250.787	-1.2564	7.71046e-17
ENSG00000161682	284069	FAM171A2	family with sequence similarity 171 member A2	125.937	-1.63558	7.73878e-17
ENSG00000075711	1739	DLG1	discs large MAGUK scaffold protein 1	2345.1	-0.639703	7.86591e-17
ENSG00000128849	84952	CGNL1	cingulin like 1	263.228	-1.18981	8.01154e-17
ENSG00000095739	25805	BAMBI	BMP and activin membrane bound inhibitor	163.913	-1.45546	8.05727e-17
ENSG00000166046	255394	TCP11L2	t-complex 11 like 2	139.739	1.80451	8.32664e-17
ENSG00000176597	84002	B3GNT5	UDP-GlcNAc:betaGal beta-1,3-N-acetylglucosaminyltransferase 5	277.002	1.14136	8.67966e-17
ENSG00000042445	54884	RETSAT	retinol saturase	815.65	0.799916	8.78721e-17
ENSG00000010278	928	CD9	CD9 molecule	1756.43	-0.924753	8.95604e-17
ENSG00000112983	10902	BRD8	bromodomain containing 8	939.565	-0.679236	9.16834e-17
ENSG00000178904	147991	DPY19L3	dpy-19 like 3 (C. elegans)	1306.39	0.809958	9.29828e-17
ENSG00000180304	4947	OAZ2	ornithine decarboxylase antizyme 2	1335.77	-0.808317	9.50315e-17
ENSG00000149639	140710	SOGA1	suppressor of glucose, autophagy associated 1	1904.34	-0.954043	9.72333e-17
ENSG00000164032	3015	H2AFZ	H2A histone family member Z	4765.2	-0.782121	9.72333e-17
ENSG00000203706	574036	SERTAD4-AS1	SERTAD4 antisense RNA 1	62.0744	-2.52755	9.76599e-17
ENSG00000128335	23780	APOL2	apolipoprotein L2	573.285	0.832707	9.93201e-17
ENSG00000183580	23194	FBXL7	F-box and leucine rich repeat protein 7	222.147	-1.29623	9.979e-17
ENSG00000179403	64856	VWA1	von Willebrand factor A domain containing 1	115.785	-2.07246	1.0247e-16
ENSG00000198948	9848	MFAP3L	microfibrillar associated protein 3 like	459.48	1.06886	1.02712e-16
ENSG00000157168	3084	NRG1	neuregulin 1	573.052	0.934873	1.03595e-16
ENSG00000234465	390940	PINLYP	phospholipase A2 inhibitor and LY6/PLAUR domain containing	34.4426	3.35443	1.09081e-16
ENSG00000005022	292	SLC25A5	solute carrier family 25 member 5	8232.62	-0.79572	1.10541e-16
ENSG00000115129	9540	TP53I3	tumor protein p53 inducible protein 3	202.418	-1.24556	1.13996e-16
ENSG00000061987	23041	MON2	MON2 homolog, regulator of endosome-to-Golgi trafficking	715.096	1.0326	1.14525e-16
ENSG00000144233	83607	AMMECR1L	AMMECR1 like	569.917	0.829693	1.1686e-16
ENSG00000164294	493869	GPX8	glutathione peroxidase 8 (putative)	1683.17	0.610351	1.1748e-16
ENSG00000272405	NA	NA	NA	93.9105	1.81519	1.21319e-16
ENSG00000131759	5914	RARA	retinoic acid receptor alpha	466.804	-1.02557	1.2557e-16
ENSG00000141582	8535	CBX4	chromobox 4	557.22	0.838985	1.26137e-16
ENSG00000214595	400954	EML6	echinoderm microtubule associated protein like 6	112.685	2.03467	1.26502e-16
ENSG00000158079	138639	PTPDC1	protein tyrosine phosphatase domain containing 1	177.692	1.43821	1.28478e-16
ENSG00000144824	90102	PHLDB2	pleckstrin homology like domain family B member 2	197.415	1.45977	1.28718e-16
ENSG00000157193	7804	LRP8	LDL receptor related protein 8	2096.26	0.590499	1.31197e-16
ENSG00000181544	2187	FANCB	Fanconi anemia complementation group B	145.035	-1.55479	1.31492e-16
ENSG00000164266	6690	SPINK1	serine peptidase inhibitor, Kazal type 1	44.3542	3.47554	1.31933e-16
ENSG00000023734	11171	STRAP	serine/threonine kinase receptor associated protein	2719.79	0.635062	1.32235e-16
ENSG00000178691	23512	SUZ12	SUZ12 polycomb repressive complex 2 subunit	1321.84	-0.652425	1.37715e-16
ENSG00000101654	8731	RNMT	RNA guanine-7 methyltransferase	901.783	0.81022	1.43431e-16
ENSG00000171451	92126	DSEL	dermatan sulfate epimerase-like	157.841	1.67123	1.50187e-16
ENSG00000265415	NA	NA	NA	201.603	-1.29548	1.64642e-16
ENSG00000108984	5608	MAP2K6	mitogen-activated protein kinase kinase 6	41.9811	-3.51034	1.64802e-16
ENSG00000205250	1874	E2F4	E2F transcription factor 4	838.819	0.712322	1.66396e-16
ENSG00000143570	27173	SLC39A1	solute carrier family 39 member 1	1848.58	-0.798703	1.72916e-16
ENSG00000205476	317762	CCDC85C	coiled-coil domain containing 85C	293.968	-1.12722	1.77323e-16
ENSG00000175643	116028	RMI2	RecQ mediated genome instability 2	71.7995	-2.31529	1.80355e-16
ENSG00000010704	3077	HFE	hemochromatosis	260.213	-1.20478	1.84617e-16
ENSG00000081177	55218	EXD2	exonuclease 3'-5' domain containing 2	535.977	0.797445	1.87003e-16
ENSG00000140931	123920	CMTM3	CKLF like MARVEL transmembrane domain containing 3	671.992	-0.920873	1.88651e-16
ENSG00000086598	10959	TMED2	transmembrane p24 trafficking protein 2	4029.44	0.558068	1.88998e-16
ENSG00000076716	2239	GPC4	glypican 4	1245.38	-0.725131	1.91271e-16
ENSG00000182197	2131	EXT1	exostosin glycosyltransferase 1	395.912	0.938806	2.0052e-16
ENSG00000117448	10327	AKR1A1	aldo-keto reductase family 1 member A1	1144.44	0.756098	2.03343e-16
ENSG00000233369	100093631	GTF2IP4	general transcription factor IIi pseudogene 4	85.8319	-1.84533	2.07483e-16
ENSG00000170549	79192	IRX1	iroquois homeobox 1	303.067	-0.99882	2.36335e-16
ENSG00000187123	130574	LYPD6	LY6/PLAUR domain containing 6	168.631	-1.33315	2.43363e-16
ENSG00000167674	84717	HDGFRP2	hepatoma-derived growth factor-related protein 2	972.26	-0.89627	2.43938e-16
ENSG00000155850	1836	SLC26A2	solute carrier family 26 member 2	888.695	-0.845865	2.45067e-16
ENSG00000026559	3755	KCNG1	potassium voltage-gated channel modifier subfamily G member 1	60.8224	2.24437	2.46768e-16
ENSG00000121281	113	ADCY7	adenylate cyclase 7	487.347	0.979485	2.53676e-16
ENSG00000170915	85315	PAQR8	progestin and adipoQ receptor family member 8	293.921	-1.22108	2.73594e-16
ENSG00000099901	5902	RANBP1	RAN binding protein 1	1284.52	-0.91668	2.76698e-16
ENSG00000204859	3104	ZBTB48	zinc finger and BTB domain containing 48	273.156	1.05638	2.78175e-16
ENSG00000125170	55715	DOK4	docking protein 4	297.724	-1.20062	2.81242e-16
ENSG00000235513	NA	NA	NA	34.8126	3.48284	2.8661e-16
ENSG00000149150	8501	SLC43A1	solute carrier family 43 member 1	67.5328	2.17577	3.01588e-16
ENSG00000165476	221035	REEP3	receptor accessory protein 3	1803.77	-0.60255	3.04477e-16
ENSG00000269343	100293516	ZNF587B	zinc finger protein 587B	144.924	1.63108	3.04699e-16
ENSG00000105559	57664	PLEKHA4	pleckstrin homology domain containing A4	194.668	-1.41869	3.1913e-16
ENSG00000256463	27164	SALL3	spalt like transcription factor 3	103.08	-1.61163	3.24566e-16
ENSG00000196405	51466	EVL	Enah/Vasp-like	344.218	-0.950494	3.31736e-16
ENSG00000143545	5872	RAB13	RAB13, member RAS oncogene family	1386.99	-0.862527	3.39237e-16
ENSG00000147894	203228	C9orf72	chromosome 9 open reading frame 72	235.355	1.31687	3.58103e-16
ENSG00000099337	9424	KCNK6	potassium two pore domain channel subfamily K member 6	42.1815	2.76372	3.62913e-16
ENSG00000101782	8780	RIOK3	RIO kinase 3	455.288	1.03068	3.62913e-16
ENSG00000147100	6567	SLC16A2	solute carrier family 16 member 2	1859.61	-0.594922	3.74952e-16
ENSG00000172201	3400	ID4	inhibitor of DNA binding 4, HLH protein	314.488	-1.07386	3.76036e-16
ENSG00000068878	23198	PSME4	proteasome activator subunit 4	2234.53	0.76329	3.76398e-16
ENSG00000184557	9021	SOCS3	suppressor of cytokine signaling 3	580.639	-0.911665	3.83242e-16
ENSG00000242125	8420	SNHG3	small nucleolar RNA host gene 3	597.353	0.792297	3.84231e-16
ENSG00000125148	4502	MT2A	metallothionein 2A	3855.04	0.795804	3.97563e-16
ENSG00000221978	81669	CCNL2	cyclin L2	1872.68	1.14941	4.10577e-16
ENSG00000068615	65055	REEP1	receptor accessory protein 1	100.12	-1.83783	4.2474e-16
ENSG00000112333	7101	NR2E1	nuclear receptor subfamily 2 group E member 1	249.258	-1.16218	4.48175e-16
ENSG00000138107	10121	ACTR1A	ARP1 actin-related protein 1 homolog A, centractin alpha	2533.95	-0.686365	4.65148e-16
ENSG00000122547	80820	EEPD1	endonuclease/exonuclease/phosphatase family domain containing 1	88.3855	-1.82795	4.73535e-16
ENSG00000183741	23466	CBX6	chromobox 6	2041.14	-0.632851	4.75685e-16
ENSG00000091527	55573	CDV3	CDV3 homolog	2241.78	0.603636	4.9495e-16
ENSG00000204267	6891	TAP2	transporter 2, ATP binding cassette subfamily B member	316.446	1.18424	5.09315e-16
ENSG00000109686	152503	SH3D19	SH3 domain containing 19	622.291	0.770681	5.25936e-16
ENSG00000167566	57701	NCKAP5L	NCK associated protein 5 like	401.363	0.928976	5.26352e-16
ENSG00000197415	79674	VEPH1	ventricular zone expressed PH domain containing 1	121.652	4.08854	5.46048e-16
ENSG00000179029	84314	TMEM107	transmembrane protein 107	122.412	-1.61943	5.54319e-16
ENSG00000271605	284021	MILR1	mast cell immunoglobulin like receptor 1	102.914	1.75025	5.55003e-16
ENSG00000115946	56902	PNO1	partner of NOB1 homolog	583.895	0.785862	5.96015e-16
ENSG00000033627	535	ATP6V0A1	ATPase H+ transporting V0 subunit a1	691.695	0.904805	6.12182e-16
ENSG00000103249	1186	CLCN7	chloride voltage-gated channel 7	705.459	0.777153	6.33386e-16
ENSG00000118508	10981	RAB32	RAB32, member RAS oncogene family	1286.58	0.796638	6.4638e-16
ENSG00000105223	23646	PLD3	phospholipase D family member 3	2159.18	0.635793	6.46869e-16
ENSG00000158292	387509	GPR153	G protein-coupled receptor 153	156.912	-1.49603	6.50764e-16
ENSG00000023330	211	ALAS1	5'-aminolevulinate synthase 1	898.971	0.647473	6.52633e-16
ENSG00000186951	5465	PPARA	peroxisome proliferator activated receptor alpha	374.251	1.05728	6.59008e-16
ENSG00000115457	3485	IGFBP2	insulin like growth factor binding protein 2	2208.75	-1.02681	6.72536e-16
ENSG00000149968	4314	MMP3	matrix metallopeptidase 3	36.2651	4.6547	6.75008e-16
ENSG00000180592	387640	SKIDA1	SKI/DACH domain containing 1	87.238	-2.02867	7.12095e-16
ENSG00000143621	3608	ILF2	interleukin enhancer binding factor 2	3755.06	-0.579647	7.12892e-16
ENSG00000255874	283487	LINC00346	long intergenic non-protein coding RNA 346	345.212	1.02711	7.41593e-16
ENSG00000239697	8742	TNFSF12	TNF superfamily member 12	938.706	-1.88557	7.45668e-16
ENSG00000148926	133	ADM	adrenomedullin	101.811	1.62163	7.6687e-16
ENSG00000157227	4323	MMP14	matrix metallopeptidase 14	1117.82	-0.807338	7.95262e-16
ENSG00000169302	202374	STK32A	serine/threonine kinase 32A	206.917	1.36168	8.12182e-16
ENSG00000132670	5786	PTPRA	protein tyrosine phosphatase, receptor type A	1409.5	-0.721371	8.13391e-16
ENSG00000019549	6591	SNAI2	snail family transcriptional repressor 2	376.151	-1.10014	8.29892e-16
ENSG00000129353	57153	SLC44A2	solute carrier family 44 member 2	1133.14	-0.924774	8.47939e-16
ENSG00000136720	9394	HS6ST1	heparan sulfate 6-O-sulfotransferase 1	235.279	-1.1322	8.48681e-16
ENSG00000128602	6608	SMO	smoothened, frizzled class receptor	461.309	-0.960389	8.62199e-16
ENSG00000129493	25938	HEATR5A	HEAT repeat containing 5A	345.359	0.990653	8.69591e-16
ENSG00000169258	114787	GPRIN1	G protein regulated inducer of neurite outgrowth 1	253.264	-1.27275	8.82032e-16
ENSG00000106804	727	C5	complement C5	135.539	-1.51136	9.14588e-16
ENSG00000279095	NA	NA	NA	201.938	1.32165	9.22745e-16
ENSG00000111319	6337	SCNN1A	sodium channel epithelial 1 alpha subunit	39.0679	-4.05826	9.41733e-16
ENSG00000183840	2863	GPR39	G protein-coupled receptor 39	136.07	-1.59113	9.80057e-16
ENSG00000274523	81554	RCC1L	RCC1 like	898.783	-0.740364	1.05425e-15
ENSG00000119938	5507	PPP1R3C	protein phosphatase 1 regulatory subunit 3C	196.358	1.22429	1.06e-15
ENSG00000141429	2589	GALNT1	polypeptide N-acetylgalactosaminyltransferase 1	576.664	-0.827131	1.08828e-15
ENSG00000218336	55714	TENM3	teneurin transmembrane protein 3	1645.58	-0.784205	1.16633e-15
ENSG00000121753	576	ADGRB2	adhesion G protein-coupled receptor B2	302.95	-1.11251	1.17983e-15
ENSG00000052850	60529	ALX4	ALX homeobox 4	50.2808	-2.73004	1.19957e-15
ENSG00000140481	80125	CCDC33	coiled-coil domain containing 33	47.3409	-2.79842	1.24508e-15
ENSG00000153561	64795	RMND5A	required for meiotic nuclear division 5 homolog A	653.35	0.794895	1.25768e-15
ENSG00000081307	79876	UBA5	ubiquitin like modifier activating enzyme 5	576.18	0.87255	1.28323e-15
ENSG00000173545	90441	ZNF622	zinc finger protein 622	523.791	0.915228	1.3e-15
ENSG00000147416	526	ATP6V1B2	ATPase H+ transporting V1 subunit B2	1721.36	0.5994	1.34195e-15
ENSG00000155313	29761	USP25	ubiquitin specific peptidase 25	362.601	0.918299	1.37197e-15
ENSG00000167123	51148	CERCAM	cerebral endothelial cell adhesion molecule	795.903	-0.877631	1.42304e-15
ENSG00000164182	91942	NDUFAF2	NADH:ubiquinone oxidoreductase complex assembly factor 2	342.145	1.08258	1.43115e-15
ENSG00000090530	55214	P3H2	prolyl 3-hydroxylase 2	308.228	-0.978997	1.44907e-15
ENSG00000198728	8861	LDB1	LIM domain binding 1	665.556	-0.780094	1.45483e-15
ENSG00000115170	90	ACVR1	activin A receptor type 1	485.736	0.774612	1.45824e-15
ENSG00000175175	22843	PPM1E	protein phosphatase, Mg2+/Mn2+ dependent 1E	145.877	1.3289	1.5609e-15
ENSG00000144597	85403	EAF1	ELL associated factor 1	517.208	0.829496	1.58376e-15
ENSG00000108474	9487	PIGL	phosphatidylinositol glycan anchor biosynthesis class L	140.201	1.50133	1.63172e-15
ENSG00000125618	7849	PAX8	paired box 8	69.0135	1.97585	1.63426e-15
ENSG00000186350	6256	RXRA	retinoid X receptor alpha	702.53	-0.778848	1.65536e-15
ENSG00000006459	80853	KDM7A	lysine demethylase 7A	254.691	1.50536	1.74032e-15
ENSG00000084463	51729	WBP11	WW domain binding protein 11	1051.84	-0.674678	1.82801e-15
ENSG00000116649	6723	SRM	spermidine synthase	2088.86	0.820714	1.8707e-15
ENSG00000175832	2118	ETV4	ETS variant 4	145.922	1.35408	1.92478e-15
ENSG00000160789	4000	LMNA	lamin A/C	6140.33	-0.709202	1.93617e-15
ENSG00000090863	2734	GLG1	golgi glycoprotein 1	5501.17	0.491344	1.94261e-15
ENSG00000051825	10198	MPHOSPH9	M-phase phosphoprotein 9	414.8	-0.888492	1.96703e-15
ENSG00000184524	51286	CEND1	cell cycle exit and neuronal differentiation 1	212.995	-1.51665	1.9992e-15
ENSG00000125968	3397	ID1	inhibitor of DNA binding 1, HLH protein	3071.16	-1.83828	2.01954e-15
ENSG00000131944	91442	FAAP24	Fanconi anemia core complex associated protein 24	142.277	-1.43454	2.03662e-15
ENSG00000125450	79902	NUP85	nucleoporin 85	710.485	-0.80563	2.0764e-15
ENSG00000187951	89839	ARHGAP11B	Rho GTPase activating protein 11B	194.371	-1.33325	2.09026e-15
ENSG00000160752	2224	FDPS	farnesyl diphosphate synthase	1325.43	-0.695207	2.19199e-15
ENSG00000137207	25844	YIPF3	Yip1 domain family member 3	1716.29	0.614239	2.19384e-15
ENSG00000179832	727957	MROH1	maestro heat like repeat family member 1	407.887	1.1608	2.2142e-15
ENSG00000141252	55275	VPS53	VPS53, GARP complex subunit	993.346	0.766615	2.21704e-15
ENSG00000140650	5373	PMM2	phosphomannomutase 2	182.759	1.29235	2.22918e-15
ENSG00000114126	7029	TFDP2	transcription factor Dp-2	476.714	-0.826282	2.2418e-15
ENSG00000170145	23235	SIK2	salt inducible kinase 2	1008.83	-0.787133	2.26656e-15
ENSG00000122741	79269	DCAF10	DDB1 and CUL4 associated factor 10	792.353	0.808817	2.34897e-15
ENSG00000105726	57130	ATP13A1	ATPase 13A1	1102.66	0.660939	2.35603e-15
ENSG00000152413	9456	HOMER1	homer scaffolding protein 1	526.929	0.78502	2.38663e-15
ENSG00000157514	1831	TSC22D3	TSC22 domain family member 3	366.317	0.918244	2.45617e-15
ENSG00000231925	6892	TAPBP	TAP binding protein	1760.45	-0.549709	2.45617e-15
[truncated: 989 more rows]

## Sheet: Snb19 - C2 - Table S4
Supplementary Table S4. The list shows the genes that were differentially expressed in THTMP vs TMZ in the cell type analysis using DESeq2
ENSEMBL	ENTREZID	SYMBOL	GENENAME	baseMean	log2FoldChange	padj
ENSG00000134853	5156	PDGFRA	platelet derived growth factor receptor alpha	3612.13	-4.32413	0
ENSG00000146197	222663	SCUBE3	signal peptide, CUB domain and EGF like domain containing 3	2246.57	-5.98565	5.73757e-267
ENSG00000118432	1268	CNR1	cannabinoid receptor 1	882.548	-4.61978	7.82735e-231
ENSG00000011426	54443	ANLN	anillin actin binding protein	4373.2	-2.40989	5.19748e-227
ENSG00000137801	7057	THBS1	thrombospondin 1	7872.53	-2.60625	4.97197e-213
ENSG00000131747	7153	TOP2A	topoisomerase (DNA) II alpha	8038.46	-2.89588	5.01207e-209
ENSG00000126787	9787	DLGAP5	DLG associated protein 5	1294.67	-2.64733	3.96594e-198
ENSG00000156802	29028	ATAD2	ATPase family, AAA domain containing 2	1312.31	-2.36224	3.82238e-195
ENSG00000112984	10112	KIF20A	kinesin family member 20A	1878.61	-2.94861	2.92755e-188
ENSG00000171617	8507	ENC1	ectodermal-neural cortex 1	5770.95	-2.5131	6.15132e-186
ENSG00000137804	51203	NUSAP1	nucleolar and spindle associated protein 1	2864.43	-2.73989	1.1081e-175
ENSG00000117724	1063	CENPF	centromere protein F	4927.56	-2.57305	1.73331e-165
ENSG00000136824	10592	SMC2	structural maintenance of chromosomes 2	1629.01	-1.92856	3.00404e-162
ENSG00000185630	5087	PBX1	PBX homeobox 1	1290.8	-2.81942	3.16723e-161
ENSG00000076382	10615	SPAG5	sperm associated antigen 5	1338.83	-2.3988	4.97647e-161
ENSG00000125285	11166	SOX21	SRY-box 21	1240.29	-3.13199	1.41055e-153
ENSG00000010292	9918	NCAPD2	non-SMC condensin I complex subunit D2	2418.44	-2.10209	5.49957e-153
ENSG00000148773	4288	MKI67	marker of proliferation Ki-67	6082.96	-2.73308	8.15021e-152
ENSG00000111859	4739	NEDD9	neural precursor cell expressed, developmentally down-regulated 9	4185.59	-2.62555	1.45782e-151
ENSG00000137807	9493	KIF23	kinesin family member 23	1965.17	-1.88557	1.72655e-151
ENSG00000164434	2173	FABP7	fatty acid binding protein 7	1470.6	-3.16053	5.44568e-151
ENSG00000170540	23204	ARL6IP1	ADP ribosylation factor like GTPase 6 interacting protein 1	3171.82	-2.12303	1.42031e-150
ENSG00000075223	10512	SEMA3C	semaphorin 3C	3690.72	-1.91124	9.35376e-149
ENSG00000171848	6241	RRM2	ribonucleotide reductase regulatory subunit M2	2073.85	-2.78171	1.64879e-148
ENSG00000117632	3925	STMN1	stathmin 1	5193.94	-2.60179	8.96893e-148
ENSG00000188042	10123	ARL4C	ADP ribosylation factor like GTPase 4C	2978.65	-2.07321	2.83121e-144
ENSG00000104368	5327	PLAT	plasminogen activator, tissue type	1327.26	-2.69036	8.37022e-142
ENSG00000149212	143686	SESN3	sestrin 3	2881.74	-2.17273	1.38598e-139
ENSG00000185432	25840	METTL7A	methyltransferase like 7A	592.618	-4.22209	1.09258e-138
ENSG00000156970	701	BUB1B	BUB1 mitotic checkpoint serine/threonine kinase B	812.986	-2.30976	1.50426e-135
ENSG00000075218	51512	GTSE1	G2 and S-phase expressed 1	700.504	-2.58311	9.92526e-135
ENSG00000168078	55872	PBK	PDZ binding kinase	1110.01	-2.47635	2.66559e-129
ENSG00000145386	890	CCNA2	cyclin A2	1826.04	-2.55535	7.29414e-129
ENSG00000189057	374393	FAM111B	family with sequence similarity 111 member B	420.449	-3.61789	1.29454e-128
ENSG00000214357	54492	NEURL1B	neuralized E3 ubiquitin protein ligase 1B	458.326	-4.42266	1.29454e-128
ENSG00000164104	3148	HMGB2	high mobility group box 2	2539.82	-1.76779	1.62689e-127
ENSG00000177706	56975	FAM20C	FAM20C, golgi associated secretory pathway kinase	2782.63	-2.40284	4.35776e-126
ENSG00000112742	7272	TTK	TTK protein kinase	897.058	-2.06413	4.58601e-126
ENSG00000176890	7298	TYMS	thymidylate synthetase	1511.34	-2.68439	1.15851e-125
ENSG00000171241	79801	SHCBP1	SHC binding and spindle associated 1	2998.4	-1.91332	1.25966e-125
ENSG00000113368	4001	LMNB1	lamin B1	1893.98	-2.48407	2.06389e-125
ENSG00000164125	51313	FAM198B	family with sequence similarity 198 member B	3835.69	-2.46593	2.28634e-125
ENSG00000046653	2824	GPM6B	glycoprotein M6B	2328.38	-2.52085	3.65681e-125
ENSG00000170312	983	CDK1	cyclin dependent kinase 1	2158.09	-2.62554	2.62117e-124
ENSG00000137558	51050	PI15	peptidase inhibitor 15	480.401	-4.05019	6.76964e-124
ENSG00000164128	4886	NPY1R	neuropeptide Y receptor Y1	658.72	-2.81825	8.94454e-124
ENSG00000140525	55215	FANCI	Fanconi anemia complementation group I	1554.54	-1.80015	1.17452e-123
ENSG00000115461	3488	IGFBP5	insulin like growth factor binding protein 5	918.391	-4.65347	4.9684e-123
ENSG00000118193	9928	KIF14	kinesin family member 14	1050.58	-1.92122	3.39516e-122
ENSG00000112276	11149	BVES	blood vessel epicardial substance	1973.44	-2.10813	4.43739e-121
ENSG00000138160	3832	KIF11	kinesin family member 11	2187.77	-2.03986	1.56984e-120
ENSG00000090889	24137	KIF4A	kinesin family member 4A	1507.65	-2.18461	4.86559e-120
ENSG00000105011	55723	ASF1B	anti-silencing function 1B histone chaperone	991.265	-2.96174	3.93702e-119
ENSG00000154096	7070	THY1	Thy-1 cell surface antigen	3089.4	-2.81946	5.20546e-119
ENSG00000178999	9212	AURKB	aurora kinase B	737.48	-2.44609	5.20546e-119
ENSG00000088325	22974	TPX2	TPX2, microtubule nucleation factor	3244.29	-1.73008	5.96699e-119
ENSG00000204580	780	DDR1	discoidin domain receptor tyrosine kinase 1	2579.75	-2.27216	7.70689e-119
ENSG00000013810	10460	TACC3	transforming acidic coiled-coil containing protein 3	1986.09	-1.88975	8.14673e-119
ENSG00000109805	64151	NCAPG	non-SMC condensin I complex subunit G	1460.66	-2.05274	3.68472e-118
ENSG00000142945	11004	KIF2C	kinesin family member 2C	1455.07	-2.15687	1.92503e-117
ENSG00000072571	3161	HMMR	hyaluronan mediated motility receptor	940.545	-2.27037	3.20498e-117
ENSG00000137868	64220	STRA6	stimulated by retinoic acid 6	1645.81	-2.3618	5.19883e-115
ENSG00000166165	1152	CKB	creatine kinase B	3422.73	-2.69165	2.67696e-114
ENSG00000245526	407047	MIR9-2	microRNA 9-2	1755.14	-1.94486	1.21147e-113
ENSG00000198901	9055	PRC1	protein regulator of cytokinesis 1	2532.48	-2.18556	1.89654e-113
ENSG00000132470	3691	ITGB4	integrin subunit beta 4	4475.43	-2.77724	5.34243e-113
ENSG00000205213	55366	LGR4	leucine rich repeat containing G protein-coupled receptor 4	1034.39	-2.61189	8.73655e-113
ENSG00000168453	55806	HR	HR, lysine demethylase and nuclear receptor corepressor	578.739	-2.46675	9.43691e-113
ENSG00000167900	7083	TK1	thymidine kinase 1	1523.4	-2.67142	1.87638e-110
ENSG00000169679	699	BUB1	BUB1 mitotic checkpoint serine/threonine kinase	1333.63	-2.16377	3.49203e-108
ENSG00000184486	5454	POU3F2	POU class 3 homeobox 2	1982.67	-2.16051	1.16285e-107
ENSG00000071282	29995	LMCD1	LIM and cysteine rich domains 1	461.663	-3.6031	3.18144e-107
ENSG00000277586	4747	NEFL	neurofilament light	2305.53	-2.77539	5.61397e-106
ENSG00000138182	9585	KIF20B	kinesin family member 20B	1497.17	-1.65712	6.56026e-106
ENSG00000196196	646962	HRCT1	histidine rich carboxyl terminus 1	534.774	-3.67478	8.91177e-106
ENSG00000111206	2305	FOXM1	forkhead box M1	1479.89	-1.89443	1.09337e-105
ENSG00000135074	8728	ADAM19	ADAM metallopeptidase domain 19	4442.6	-2.21881	8.69032e-105
ENSG00000157456	9133	CCNB2	cyclin B2	1538.65	-2.14039	9.21422e-105
ENSG00000082497	56256	SERTAD4	SERTA domain containing 4	362.826	-3.92974	1.67275e-104
ENSG00000138180	55165	CEP55	centrosomal protein 55	1879.42	-1.98205	1.30868e-103
ENSG00000114346	1894	ECT2	epithelial cell transforming 2	1547.57	-1.72321	3.69091e-103
ENSG00000124479	4693	NDP	NDP, norrin cystine knot growth factor	825.457	-3.14893	4.00529e-103
ENSG00000127863	55504	TNFRSF19	TNF receptor superfamily member 19	800.735	-2.90413	8.70792e-103
ENSG00000145824	9547	CXCL14	C-X-C motif chemokine ligand 14	2314.45	-5.63119	2.67779e-102
ENSG00000113657	1809	DPYSL3	dihydropyrimidinase like 3	6796.98	-1.57739	3.89768e-102
ENSG00000124225	56937	PMEPA1	prostate transmembrane protein, androgen induced 1	6535.32	-2.45359	1.47589e-101
ENSG00000187634	148398	SAMD11	sterile alpha motif domain containing 11	495.706	-3.00739	1.48037e-101
ENSG00000213347	83463	MXD3	MAX dimerization protein 3	353.924	-3.41195	3.97389e-101
ENSG00000132640	22903	BTBD3	BTB domain containing 3	3605.6	-1.84118	4.32734e-101
ENSG00000124766	6659	SOX4	SRY-box 4	3519.67	-2.3024	2.41224e-100
ENSG00000132688	10763	NES	nestin	7540.54	-1.48454	1.67226e-99
ENSG00000164976	57462	KIAA1161	KIAA1161	405.959	-3.06359	2.71285e-99
ENSG00000117399	991	CDC20	cell division cycle 20	2031.65	-2.08115	7.07266e-99
ENSG00000072310	6720	SREBF1	sterol regulatory element binding transcription factor 1	2231.98	-2.13666	1.12828e-98
ENSG00000134222	84722	PSRC1	proline and serine rich coiled-coil 1	717.406	-2.49499	1.1521e-98
ENSG00000109099	5376	PMP22	peripheral myelin protein 22	2188.3	-2.26482	1.76197e-98
ENSG00000099282	23555	TSPAN15	tetraspanin 15	1745.18	-2.55228	1.77886e-98
ENSG00000120802	7112	TMPO	thymopoietin	2183.44	-1.61408	2.46977e-98
ENSG00000171604	51523	CXXC5	CXXC finger protein 5	1483.83	-2.44841	3.69675e-96
ENSG00000122966	11113	CIT	citron rho-interacting serine/threonine kinase	655.79	-2.38594	5.83497e-96
ENSG00000161011	8878	SQSTM1	sequestosome 1	6608.24	2.33765	7.10015e-96
ENSG00000161800	29127	RACGAP1	Rac GTPase activating protein 1	1186.54	-1.75033	7.5579e-96
ENSG00000137812	57082	KNL1	kinetochore scaffold 1	646.158	-2.1748	1.12891e-95
ENSG00000198826	9824	ARHGAP11A	Rho GTPase activating protein 11A	1070.08	-1.76934	3.68973e-95
ENSG00000040275	54908	SPDL1	spindle apparatus coiled-coil protein 1	1512.44	-1.60109	9.02788e-95
ENSG00000260916	9236	CCPG1	cell cycle progression 1	670.985	2.22213	3.70832e-94
ENSG00000065320	9423	NTN1	netrin 1	820.35	-2.76678	3.70887e-94
ENSG00000122952	11130	ZWINT	ZW10 interacting kinetochore protein	1063.7	-2.40495	1.1693e-93
ENSG00000167325	6240	RRM1	ribonucleotide reductase catalytic subunit M1	1839.04	-1.70032	1.68933e-93
ENSG00000121152	23397	NCAPH	non-SMC condensin I complex subunit H	540.355	-2.48661	2.09049e-93
ENSG00000162063	899	CCNF	cyclin F	589.552	-2.43766	5.28373e-93
ENSG00000149503	3619	INCENP	inner centromere protein	738.875	-2.37994	7.54538e-93
ENSG00000237649	3833	KIFC1	kinesin family member C1	1034.37	-2.49397	2.89414e-92
ENSG00000168077	51435	SCARA3	scavenger receptor class A member 3	478.493	-2.78779	1.27678e-91
ENSG00000143228	83540	NUF2	NUF2, NDC80 kinetochore complex component	729.513	-2.40106	3.27269e-91
ENSG00000089685	332	BIRC5	baculoviral IAP repeat containing 5	2196.63	-2.41348	5.12979e-91
ENSG00000068489	55771	PRR11	proline rich 11	1547.55	-1.56993	5.36671e-91
ENSG00000080986	10403	NDC80	NDC80, kinetochore complex component	795.201	-1.92601	9.82407e-91
ENSG00000167191	51704	GPRC5B	G protein-coupled receptor class C group 5 member B	683.413	-3.14015	1.03185e-90
ENSG00000069275	64710	NUCKS1	nuclear casein kinase and cyclin dependent kinase substrate 1	10510.8	-1.42437	5.52651e-90
ENSG00000116016	2034	EPAS1	endothelial PAS domain protein 1	1242.19	2.43321	1.01979e-89
ENSG00000019144	23187	PHLDB1	pleckstrin homology like domain family B member 1	1398.68	-1.90202	3.75425e-88
ENSG00000144554	2177	FANCD2	Fanconi anemia complementation group D2	714.874	-2.04668	5.55993e-88
ENSG00000065328	55388	MCM10	minichromosome maintenance 10 replication initiation factor	340.541	-2.68248	7.22069e-88
ENSG00000125945	80818	ZNF436	zinc finger protein 436	877.484	-1.81208	2.06653e-87
ENSG00000102384	2491	CENPI	centromere protein I	484.343	-2.34028	4.16145e-87
ENSG00000204262	1290	COL5A2	collagen type V alpha 2 chain	3281.03	-1.66027	6.71646e-87
ENSG00000138778	1062	CENPE	centromere protein E	1121.86	-1.79395	1.18941e-86
ENSG00000066279	259266	ASPM	abnormal spindle microtubule assembly	2101.12	-2.27081	3.19572e-86
ENSG00000068078	2261	FGFR3	fibroblast growth factor receptor 3	593.607	-2.50261	3.39441e-86
ENSG00000136108	26586	CKAP2	cytoskeleton associated protein 2	1590.76	-1.43951	4.94368e-86
ENSG00000116133	1718	DHCR24	24-dehydrocholesterol reductase	7075.71	-1.61365	2.49244e-85
ENSG00000117650	4751	NEK2	NIMA related kinase 2	562.172	-2.23861	5.78353e-85
ENSG00000255690	9865	TRIL	TLR4 interactor with leucine rich repeats	352.002	-5.13833	2.0705e-84
ENSG00000196365	9361	LONP1	lon peptidase 1, mitochondrial	3685.37	1.48073	2.82931e-84
ENSG00000099194	6319	SCD	stearoyl-CoA desaturase	12926.3	-1.70276	3.88513e-84
ENSG00000113810	10051	SMC4	structural maintenance of chromosomes 4	2280.92	-1.38277	8.74503e-84
ENSG00000134243	6272	SORT1	sortilin 1	4093.4	-1.59894	1.72254e-83
ENSG00000134824	9415	FADS2	fatty acid desaturase 2	1981.63	-2.45496	2.71482e-83
ENSG00000182481	3838	KPNA2	karyopherin subunit alpha 2	5024.12	-1.75932	3.06743e-83
ENSG00000108821	1277	COL1A1	collagen type I alpha 1 chain	317.765	-2.79211	1.44708e-82
ENSG00000132646	5111	PCNA	proliferating cell nuclear antigen	2526.52	-1.79355	2.99375e-82
ENSG00000101447	81610	FAM83D	family with sequence similarity 83 member D	937.081	-2.19225	7.15706e-82
ENSG00000185624	5034	P4HB	prolyl 4-hydroxylase subunit beta	13073.1	1.05876	9.70621e-82
ENSG00000171320	157570	ESCO2	establishment of sister chromatid cohesion N-acetyltransferase 2	358.214	-2.67257	1.68594e-81
ENSG00000182985	23705	CADM1	cell adhesion molecule 1	2476.68	-1.8277	4.69961e-81
ENSG00000146918	54892	NCAPG2	non-SMC condensin II complex subunit G2	2209.55	-1.62661	5.30703e-81
ENSG00000175063	11065	UBE2C	ubiquitin conjugating enzyme E2 C	1233.07	-2.39453	5.70122e-81
ENSG00000185585	169611	OLFML2A	olfactomedin like 2A	435.964	-3.01999	6.27972e-81
ENSG00000198431	7296	TXNRD1	thioredoxin reductase 1	13696.1	2.03926	1.56974e-80
ENSG00000052749	23223	RRP12	ribosomal RNA processing 12 homolog	1463.81	1.84875	2.78776e-80
ENSG00000166106	170689	ADAMTS15	ADAM metallopeptidase with thrombospondin type 1 motif 15	720.119	-2.59791	3.18288e-80
ENSG00000007968	1870	E2F2	E2F transcription factor 2	254.919	-3.51453	6.8436e-80
ENSG00000164303	133121	ENPP6	ectonucleotide pyrophosphatase/phosphodiesterase 6	435.799	-2.84333	8.66432e-80
ENSG00000058262	29927	SEC61A1	Sec61 translocon alpha 1 subunit	8119.81	1.07129	1.74753e-79
ENSG00000164176	10085	EDIL3	EGF like repeats and discoidin domains 3	10041.1	-1.42161	2.45476e-79
ENSG00000140941	81631	MAP1LC3B	microtubule associated protein 1 light chain 3 beta	3368.92	2.05394	5.13699e-79
ENSG00000120742	27230	SERP1	stress associated endoplasmic reticulum protein 1	2046.91	1.65711	5.75338e-79
ENSG00000101057	4605	MYBL2	MYB proto-oncogene like 2	1543.28	-2.59389	1.03391e-78
ENSG00000184602	8303	SNN	stannin	572.041	-2.46089	4.33083e-78
ENSG00000134057	891	CCNB1	cyclin B1	3280.99	-2.34475	2.2435e-77
ENSG00000110675	55531	ELMOD1	ELMO domain containing 1	339.377	-3.19373	2.30598e-77
ENSG00000087086	2512	FTL	ferritin light chain	46062.7	1.66951	6.24664e-77
ENSG00000168374	378	ARF4	ADP ribosylation factor 4	7066.93	2.11114	2.69774e-76
ENSG00000188338	10991	SLC38A3	solute carrier family 38 member 3	1367.22	-4.23942	4.86338e-76
ENSG00000163535	151246	SGO2	shugoshin 2	651.617	-1.87136	6.85617e-76
ENSG00000142731	10733	PLK4	polo like kinase 4	598.702	-2.12052	7.1989e-76
ENSG00000135919	5270	SERPINE2	serpin family E member 2	1452.58	1.77801	3.98119e-75
ENSG00000242808	347689	SOX2-OT	SOX2 overlapping transcript	1141.93	-1.75882	6.34885e-75
ENSG00000167680	10501	SEMA6B	semaphorin 6B	1171.95	-1.93514	9.38552e-75
ENSG00000122218	1314	COPA	coatomer protein complex subunit alpha	5773.66	1.26201	1.26908e-74
ENSG00000162595	9077	DIRAS3	DIRAS family GTPase 3	364.036	-3.14625	3.88228e-74
ENSG00000197959	26052	DNM3	dynamin 3	761.178	-1.74282	8.81996e-74
ENSG00000167670	10036	CHAF1A	chromatin assembly factor 1 subunit A	801.662	-1.72052	1.06474e-73
ENSG00000146250	167681	PRSS35	protease, serine 35	283.545	-3.60394	1.17304e-73
ENSG00000136492	83990	BRIP1	BRCA1 interacting protein C-terminal helicase 1	372.265	-2.3288	1.23948e-73
ENSG00000110619	833	CARS	cysteinyl-tRNA synthetase	1146.93	1.74764	1.41228e-73
ENSG00000116962	4811	NID1	nidogen 1	2315.42	-1.32769	1.41825e-73
ENSG00000134986	9315	NREP	neuronal regeneration related protein	508.711	-2.72305	2.13919e-73
ENSG00000169607	150468	CKAP2L	cytoskeleton associated protein 2 like	533.053	-2.03488	2.13919e-73
ENSG00000128487	92521	SPECC1	sperm antigen with calponin homology and coiled-coil domains 1	1578.51	-1.49952	2.22056e-73
ENSG00000148541	220965	FAM13C	family with sequence similarity 13 member C	302.089	-3.5941	3.06346e-73
ENSG00000125398	6662	SOX9	SRY-box 9	2102.03	-1.86239	3.77621e-73
ENSG00000244405	2119	ETV5	ETS variant 5	1325.35	1.48388	3.86323e-73
ENSG00000153879	1054	CEBPG	CCAAT/enhancer binding protein gamma	2161.4	1.60118	3.87401e-73
ENSG00000166750	162394	SLFN5	schlafen family member 5	1413.97	1.83778	9.98426e-73
ENSG00000184575	11260	XPOT	exportin for tRNA	3547.05	1.82825	1.09999e-72
ENSG00000142910	64129	TINAGL1	tubulointerstitial nephritis antigen like 1	308.208	-3.06832	1.37678e-72
ENSG00000277443	4082	MARCKS	myristoylated alanine rich protein kinase C substrate	7003.25	-1.67427	1.41077e-72
ENSG00000129195	54478	PIMREG	PICALM interacting mitotic regulator	613.18	-2.5846	2.69725e-72
ENSG00000120686	51569	UFM1	ubiquitin fold modifier 1	1575.13	1.75607	2.84319e-72
ENSG00000166803	9768	PCLAF	PCNA clamp associated factor	416.919	-2.49598	2.92311e-72
ENSG00000131153	51659	GINS2	GINS complex subunit 2	648.509	-2.27603	3.86015e-72
ENSG00000061337	11178	LZTS1	leucine zipper tumor suppressor 1	437.605	-2.79228	6.06292e-72
ENSG00000123374	1017	CDK2	cyclin dependent kinase 2	656.221	-1.91604	1.67337e-71
ENSG00000205403	3426	CFI	complement factor I	599.952	-2.03108	1.94599e-71
ENSG00000150687	11098	PRSS23	protease, serine 23	3415.22	-1.64007	2.01753e-71
ENSG00000196954	837	CASP4	caspase 4	523.685	1.91947	5.23586e-71
ENSG00000170006	201799	TMEM154	transmembrane protein 154	831.062	1.75929	1.06289e-70
ENSG00000138346	1763	DNA2	DNA replication helicase/nuclease 2	397.278	-2.13019	1.29661e-70
ENSG00000169908	4071	TM4SF1	transmembrane 4 L six family member 1	1070.61	-1.68008	1.64622e-70
ENSG00000186185	146909	KIF18B	kinesin family member 18B	570.121	-2.25762	1.77244e-70
ENSG00000132780	4678	NASP	nuclear autoantigenic sperm protein	2151.22	-1.24492	3.05896e-70
ENSG00000104738	4173	MCM4	minichromosome maintenance complex component 4	2079.06	-1.849	3.87101e-70
ENSG00000035499	55789	DEPDC1B	DEP domain containing 1B	456.635	-2.22131	4.04525e-70
ENSG00000120437	39	ACAT2	acetyl-CoA acetyltransferase 2	839.127	-1.86673	5.50883e-70
ENSG00000123485	55355	HJURP	Holliday junction recognition protein	622.898	-2.04742	5.50883e-70
ENSG00000198830	3151	HMGN2	high mobility group nucleosomal binding domain 2	3550.05	-1.732	5.97067e-70
ENSG00000169710	2194	FASN	fatty acid synthase	6120.21	-1.33199	8.12592e-70
ENSG00000196628	6925	TCF4	transcription factor 4	760.412	-1.7141	8.19184e-70
ENSG00000075461	27092	CACNG4	calcium voltage-gated channel auxiliary subunit gamma 4	328.867	-2.39288	8.50443e-70
ENSG00000183856	128239	IQGAP3	IQ motif containing GTPase activating protein 3	1385.52	-1.59909	1.43198e-69
ENSG00000198380	2673	GFPT1	glutamine--fructose-6-phosphate transaminase 1	3260.1	2.16774	2.03114e-69
ENSG00000121957	29899	GPSM2	G-protein signaling modulator 2	671.933	-1.66787	2.19083e-69
ENSG00000113013	3313	HSPA9	heat shock protein family A (Hsp70) member 9	10516.5	1.68765	2.20196e-69
ENSG00000140937	1009	CDH11	cadherin 11	674.096	-1.98077	3.926e-69
ENSG00000139263	121227	LRIG3	leucine rich repeats and immunoglobulin like domains 3	667.06	-2.00428	4.38048e-69
ENSG00000125826	10616	RBCK1	RANBP2-type and C3HC4-type zinc finger containing 1	1223.27	1.58526	6.24274e-69
ENSG00000163032	7447	VSNL1	visinin like 1	369.144	-3.02685	8.08497e-69
ENSG00000156136	1633	DCK	deoxycytidine kinase	1161.53	-1.55037	8.92163e-69
ENSG00000153944	124540	MSI2	musashi RNA binding protein 2	2613.49	-1.46833	1.11778e-68
ENSG00000143126	1952	CELSR2	cadherin EGF LAG seven-pass G-type receptor 2	1469.74	-1.88865	1.41331e-68
ENSG00000092853	63967	CLSPN	claspin	521.749	-1.97292	1.74876e-68
ENSG00000129116	23022	PALLD	palladin, cytoskeletal associated protein	6488.55	-1.36002	5.18979e-68
ENSG00000165434	283209	PGM2L1	phosphoglucomutase 2 like 1	1283.9	-1.42461	5.35212e-68
ENSG00000196562	55959	SULF2	sulfatase 2	1813.25	-1.55111	5.96687e-68
ENSG00000116584	9181	ARHGEF2	Rho/Rac guanine nucleotide exchange factor 2	2221.51	2.17742	6.62528e-68
ENSG00000156510	80201	HKDC1	hexokinase domain containing 1	764.18	2.67512	8.3673e-68
ENSG00000177098	6330	SCN4B	sodium voltage-gated channel beta subunit 4	283.712	-3.36876	8.64801e-68
ENSG00000228716	1719	DHFR	dihydrofolate reductase	572.185	-2.02024	1.01183e-67
ENSG00000001084	2729	GCLC	glutamate-cysteine ligase catalytic subunit	1262.49	1.68178	2.24764e-67
ENSG00000163507	57650	KIAA1524	KIAA1524	550.373	-1.81168	3.31466e-67
ENSG00000166123	84706	GPT2	glutamic--pyruvic transaminase 2	2153.6	1.81081	7.24418e-67
ENSG00000120889	8795	TNFRSF10B	TNF receptor superfamily member 10b	1994.01	1.80788	1.02483e-66
ENSG00000227036	400619	LINC00511	long intergenic non-protein coding RNA 511	889.651	-2.19162	1.23884e-66
ENSG00000115163	1058	CENPA	centromere protein A	471.097	-2.12546	2.43386e-66
ENSG00000186871	54821	ERCC6L	ERCC excision repair 6 like, spindle assembly checkpoint helicase	331.796	-2.30111	3.71007e-66
ENSG00000100219	7494	XBP1	X-box binding protein 1	1248.05	1.6793	4.63638e-66
ENSG00000152253	57405	SPC25	SPC25, NDC80 kinetochore complex component	250.65	-2.76211	5.03417e-66
ENSG00000114480	2632	GBE1	1,4-alpha-glucan branching enzyme 1	2776.28	1.51643	2.13124e-65
ENSG00000127526	79939	SLC35E1	solute carrier family 35 member E1	1747.04	1.272	4.92519e-65
ENSG00000188486	3014	H2AFX	H2A histone family member X	2413.56	-2.20366	5.50676e-65
ENSG00000117143	6675	UAP1	UDP-N-acetylglucosamine pyrophosphorylase 1	2626.14	1.76185	5.58149e-65
ENSG00000184661	157313	CDCA2	cell division cycle associated 2	619.877	-2.23375	6.36522e-65
ENSG00000065802	51665	ASB1	ankyrin repeat and SOCS box containing 1	1506.31	1.40921	8.5421e-65
ENSG00000071537	6400	SEL1L	SEL1L ERAD E3 ligase adaptor subunit	2668.92	1.58588	9.71064e-65
ENSG00000169991	126917	IFFO2	intermediate filament family orphan 2	1299.41	-1.68553	1.30343e-64
ENSG00000119403	26147	PHF19	PHD finger protein 19	870.717	-1.66193	3.20642e-64
ENSG00000150527	4253	MIA2	melanoma inhibitory activity 2	550.371	1.91463	1.02523e-63
ENSG00000120053	2805	GOT1	glutamic-oxaloacetic transaminase 1	1344.74	1.69033	1.22121e-63
ENSG00000003096	90293	KLHL13	kelch like family member 13	881.395	-1.82434	6.21427e-63
ENSG00000213853	2013	EMP2	epithelial membrane protein 2	332.762	-2.35472	9.86261e-63
ENSG00000094916	23468	CBX5	chromobox 5	2308.78	-1.28377	9.96448e-63
ENSG00000090861	16	AARS	alanyl-tRNA synthetase	3583.24	1.30503	1.16719e-62
ENSG00000196305	3376	IARS	isoleucyl-tRNA synthetase	5160.52	1.65213	1.51192e-62
ENSG00000183671	2825	GPR1	G protein-coupled receptor 1	342.569	2.95119	1.70297e-62
ENSG00000265808	9554	SEC22B	SEC22 homolog B, vesicle trafficking protein (gene/pseudogene)	10867.7	1.11438	2.70818e-62
ENSG00000150551	116372	LYPD1	LY6/PLAUR domain containing 1	494.667	-2.70621	2.7401e-62
ENSG00000272841	NA	NA	NA	2273.79	-1.92004	2.92619e-62
ENSG00000166851	5347	PLK1	polo like kinase 1	1196.02	-2.26676	6.84425e-62
ENSG00000189403	3146	HMGB1	high mobility group box 1	2863.79	-1.70583	7.2321e-62
ENSG00000031698	6301	SARS	seryl-tRNA synthetase	3584.09	1.52312	1.00213e-61
ENSG00000151725	79682	CENPU	centromere protein U	493.002	-2.11755	1.19652e-61
ENSG00000173786	1267	CNP	2',3'-cyclic nucleotide 3' phosphodiesterase	2399.34	-1.49227	1.19652e-61
ENSG00000136153	4008	LMO7	LIM domain 7	404.271	-1.90451	1.53938e-61
ENSG00000164109	4085	MAD2L1	mitotic arrest deficient 2 like 1	1594.78	-1.50231	2.73969e-61
ENSG00000138166	1847	DUSP5	dual specificity phosphatase 5	359.092	2.65536	3.05917e-61
ENSG00000182628	348235	SKA2	spindle and kinetochore associated complex subunit 2	1830.8	-1.62857	3.42685e-61
ENSG00000182871	80781	COL18A1	collagen type XVIII alpha 1 chain	1640.46	-1.61332	4.50533e-61
ENSG00000174371	9156	EXO1	exonuclease 1	358.369	-2.11627	4.69219e-61
ENSG00000134690	55143	CDCA8	cell division cycle associated 8	801.283	-2.08118	6.86415e-61
ENSG00000165480	221150	SKA3	spindle and kinetochore associated complex subunit 3	443.519	-1.92494	7.20865e-61
ENSG00000128951	1854	DUT	deoxyuridine triphosphatase	1213.31	-1.5973	7.34784e-61
ENSG00000261824	148189	LINC00662	long intergenic non-protein coding RNA 662	657.413	2.37123	1.09434e-60
ENSG00000091129	4897	NRCAM	neuronal cell adhesion molecule	1489.25	1.52099	1.2779e-60
ENSG00000155961	116442	RAB39B	RAB39B, member RAS oncogene family	379.321	2.23525	3.12293e-60
ENSG00000101003	9837	GINS1	GINS complex subunit 1	474.797	-2.12857	4.92593e-60
ENSG00000161888	147841	SPC24	SPC24, NDC80 kinetochore complex component	402.24	-2.37372	5.98236e-60
ENSG00000065534	4638	MYLK	myosin light chain kinase	3536.25	-1.76874	7.71103e-60
ENSG00000133466	114904	C1QTNF6	C1q and TNF related 6	305.851	-2.60738	1.03002e-59
ENSG00000187735	6917	TCEA1	transcription elongation factor A1	1357.48	1.35372	1.11663e-59
ENSG00000092470	79968	WDR76	WD repeat domain 76	504.969	-1.89063	1.13251e-59
ENSG00000143401	81611	ANP32E	acidic nuclear phosphoprotein 32 family member E	2524.22	-1.16147	1.57778e-59
ENSG00000073111	4171	MCM2	minichromosome maintenance complex component 2	1351.82	-1.90892	1.99785e-59
ENSG00000101294	81502	HM13	histocompatibility minor 13	3331.39	1.32274	2.27671e-59
ENSG00000143476	51514	DTL	denticleless E3 ubiquitin protein ligase homolog	560.567	-1.95126	2.59258e-59
ENSG00000179300	203430	RTL3	retrotransposon Gag like 3	207.286	-3.11652	2.90641e-59
ENSG00000079616	3835	KIF22	kinesin family member 22	659.893	-2.04633	3.25828e-59
ENSG00000243244	11037	STON1	stonin 1	205.657	-3.76539	1.2964e-58
ENSG00000029993	3149	HMGB3	high mobility group box 3	1959.55	-1.46575	1.4712e-58
ENSG00000105486	3978	LIG1	DNA ligase 1	556.529	-1.85343	1.6261e-58
ENSG00000111913	9750	RIPOR2	RHO family interacting cell polarization regulator 2	272.268	-2.65637	1.82473e-58
ENSG00000078900	7161	TP73	tumor protein p73	246.439	-2.56468	2.21343e-58
ENSG00000146373	154214	RNF217	ring finger protein 217	1228.87	-1.23459	4.34241e-58
ENSG00000142173	1292	COL6A2	collagen type VI alpha 2 chain	4051	0.933909	5.11195e-58
ENSG00000165304	9833	MELK	maternal embryonic leucine zipper kinase	1324.2	-1.52694	9.92461e-58
ENSG00000091490	23231	SEL1L3	SEL1L family member 3	1686.97	1.21454	1.38228e-57
ENSG00000105894	5764	PTN	pleiotrophin	1348.87	-1.61518	3.49024e-57
ENSG00000140416	7168	TPM1	tropomyosin 1 (alpha)	2570.51	-1.32403	3.70297e-57
ENSG00000187720	79875	THSD4	thrombospondin type 1 domain containing 4	369.537	2.35115	6.68123e-57
ENSG00000104635	23516	SLC39A14	solute carrier family 39 member 14	1632.81	1.45772	8.56296e-57
ENSG00000134291	79022	TMEM106C	transmembrane protein 106C	1216.22	-1.71577	1.14445e-56
ENSG00000168675	753	LDLRAD4	low density lipoprotein receptor class A domain containing 4	499.662	-1.95857	1.30231e-56
ENSG00000085377	5550	PREP	prolyl endopeptidase	1842.73	-1.4627	1.47094e-56
ENSG00000104967	4858	NOVA2	NOVA alternative splicing regulator 2	539.262	-1.88123	2.38932e-56
ENSG00000139044	283358	B4GALNT3	beta-1,4-N-acetyl-galactosaminyltransferase 3	483.274	-2.70526	2.90979e-56
ENSG00000163430	11167	FSTL1	follistatin like 1	2127.28	-1.29413	3.06105e-56
ENSG00000122779	8805	TRIM24	tripartite motif containing 24	1272.86	-1.64571	3.32623e-56
ENSG00000065911	10797	MTHFD2	methylenetetrahydrofolate dehydrogenase (NADP+ dependent) 2, methenyltetrahydrofolate cyclohydrolase	2944.77	1.85683	4.20845e-56
ENSG00000049541	5982	RFC2	replication factor C subunit 2	1067.29	-1.59216	5.30199e-56
ENSG00000163235	7039	TGFA	transforming growth factor alpha	1156.71	-1.8376	6.3835e-56
ENSG00000108433	9570	GOSR2	golgi SNAP receptor complex member 2	1117.5	1.44319	6.83375e-56
ENSG00000100162	79019	CENPM	centromere protein M	254.5	-2.36512	7.55948e-56
ENSG00000179761	51268	PIPOX	pipecolic acid and sarcosine oxidase	1244.48	-2.15124	8.40686e-56
ENSG00000070961	490	ATP2B1	ATPase plasma membrane Ca2+ transporting 1	1857.67	1.74757	1.15133e-55
ENSG00000104332	6422	SFRP1	secreted frizzled related protein 1	900.544	-1.52236	1.15377e-55
ENSG00000087494	5744	PTHLH	parathyroid hormone like hormone	1672.05	1.42678	1.45467e-55
ENSG00000109685	7468	NSD2	nuclear receptor binding SET domain protein 2	3862.23	-0.998014	2.01605e-55
ENSG00000166986	4141	MARS	methionyl-tRNA synthetase	2701.67	1.48167	2.09729e-55
ENSG00000077152	29089	UBE2T	ubiquitin conjugating enzyme E2 T	620.946	-1.93941	2.15717e-55
ENSG00000182934	6734	SRPRA	SRP receptor alpha subunit	4606.26	1.17719	2.20046e-55
ENSG00000186318	23621	BACE1	beta-secretase 1	1582.22	-1.31718	2.50015e-55
ENSG00000106638	26608	TBL2	transducin beta like 2	1089.58	1.3107	2.57877e-55
ENSG00000116717	1647	GADD45A	growth arrest and DNA damage inducible alpha	1147.15	1.85936	3.11233e-55
ENSG00000122863	9469	CHST3	carbohydrate sulfotransferase 3	2369.96	-1.38424	3.17882e-55
ENSG00000043143	23338	JADE2	jade family PHD finger 2	919.699	-1.30674	3.23696e-55
ENSG00000164904	501	ALDH7A1	aldehyde dehydrogenase 7 family member A1	1279.63	-1.43963	3.23696e-55
ENSG00000166508	4176	MCM7	minichromosome maintenance complex component 7	2977.8	-1.33909	3.45659e-55
ENSG00000113407	6897	TARS	threonyl-tRNA synthetase	3569.07	1.11114	3.90638e-55
ENSG00000006652	3475	IFRD1	interferon related developmental regulator 1	1843.62	1.6152	4.29831e-55
ENSG00000100526	1033	CDKN3	cyclin dependent kinase inhibitor 3	527.626	-1.79101	1.06316e-54
ENSG00000112118	4172	MCM3	minichromosome maintenance complex component 3	2324.5	-1.50784	1.59135e-54
ENSG00000112139	266727	MDGA1	MAM domain containing glycosylphosphatidylinositol anchor 1	555.113	-1.81357	1.98894e-54
ENSG00000024526	55635	DEPDC1	DEP domain containing 1	1185.46	-1.42291	2.05586e-54
ENSG00000135476	9700	ESPL1	extra spindle pole bodies like 1, separase	435.612	-2.15651	2.48042e-54
ENSG00000126016	154796	AMOT	angiomotin	1105.21	-1.41942	6.68165e-54
ENSG00000196352	1604	CD55	CD55 molecule (Cromer blood group)	581.909	2.54749	7.62169e-54
ENSG00000119969	3070	HELLS	helicase, lymphoid-specific	564.2	-1.97171	7.7124e-54
ENSG00000242802	9907	AP5Z1	adaptor related protein complex 5 zeta 1 subunit	707.868	1.43436	1.00035e-53
ENSG00000153132	1047	CLGN	calmegin	1479.38	1.63803	1.32556e-53
ENSG00000179918	22928	SEPHS2	selenophosphate synthetase 2	1620.85	1.34374	1.50631e-53
ENSG00000101911	5634	PRPS2	phosphoribosyl pyrophosphate synthetase 2	2203.93	-1.38612	1.76313e-53
ENSG00000107175	10488	CREB3	cAMP responsive element binding protein 3	1459	1.2598	1.9485e-53
ENSG00000171444	4163	MCC	mutated in colorectal cancers	1581.39	-1.45539	2.45326e-53
ENSG00000111665	83461	CDCA3	cell division cycle associated 3	349.977	-2.32108	3.62191e-53
ENSG00000123496	3598	IL13RA2	interleukin 13 receptor subunit alpha 2	1663.54	1.61233	5.78772e-53
ENSG00000025796	11231	SEC63	SEC63 homolog, protein translocation regulator	2698.4	1.21436	1.62381e-52
ENSG00000175216	9793	CKAP5	cytoskeleton associated protein 5	4305.89	-1.09016	1.79052e-52
ENSG00000144867	58477	SRPRB	SRP receptor beta subunit	1313.21	1.31773	2.51047e-52
ENSG00000057019	131566	DCBLD2	discoidin, CUB and LCCL domain containing 2	17173.3	1.15565	3.66254e-52
ENSG00000135821	2752	GLUL	glutamate-ammonia ligase	1689.92	-1.09849	7.38224e-52
ENSG00000138685	2247	FGF2	fibroblast growth factor 2	1494.27	1.4326	8.21343e-52
ENSG00000168386	11259	FILIP1L	filamin A interacting protein 1 like	354.235	-2.41027	1.25598e-51
ENSG00000105928	1687	DFNA5	DFNA5, deafness associated tumor suppressor	793.085	1.67574	1.26371e-51
ENSG00000109654	23321	TRIM2	tripartite motif containing 2	5207.29	-1.3987	1.33684e-51
ENSG00000176974	6470	SHMT1	serine hydroxymethyltransferase 1	772.759	-1.5778	1.48186e-51
ENSG00000106003	3955	LFNG	LFNG O-fucosylpeptide 3-beta-N-acetylglucosaminyltransferase	171.546	-3.2206	1.53929e-51
ENSG00000123416	10376	TUBA1B	tubulin alpha 1b	3851.51	-1.6495	2.19312e-51
ENSG00000060982	586	BCAT1	branched chain amino acid transaminase 1	4784.82	1.45934	2.33365e-51
ENSG00000135451	10024	TROAP	trophinin associated protein	430.576	-1.99314	2.7604e-51
ENSG00000227640	100507533	SOX21-AS1	SOX21 antisense RNA 1 (head to head)	555.254	-2.02127	3.51086e-51
ENSG00000139514	6541	SLC7A1	solute carrier family 7 member 1	2815.33	1.37737	3.84855e-51
ENSG00000149428	10525	HYOU1	hypoxia up-regulated 1	6699.18	1.37332	3.86405e-51
ENSG00000124813	860	RUNX2	runt related transcription factor 2	884.017	-1.35897	7.31757e-51
ENSG00000240184	5098	PCDHGC3	protocadherin gamma subfamily C, 3	1179.98	-1.66777	1.04278e-50
ENSG00000008441	4784	NFIX	nuclear factor I X	2964.45	-1.32776	1.14808e-50
ENSG00000168209	54541	DDIT4	DNA damage inducible transcript 4	1401.39	2.13413	1.18623e-50
ENSG00000092621	26227	PHGDH	phosphoglycerate dehydrogenase	15883.7	1.64143	1.23389e-50
ENSG00000154380	55740	ENAH	enabled homolog (Drosophila)	5354.45	-1.19013	1.4534e-50
ENSG00000160298	54058	C21orf58	chromosome 21 open reading frame 58	282.976	-1.99656	1.58255e-50
ENSG00000123473	6491	STIL	SCL/TAL1 interrupting locus	699.477	-1.55298	1.72109e-50
ENSG00000197299	641	BLM	Bloom syndrome RecQ like helicase	295.116	-2.12685	2.31626e-50
ENSG00000126785	57381	RHOJ	ras homolog family member J	408.115	-2.17514	2.39748e-50
ENSG00000070540	55062	WIPI1	WD repeat domain, phosphoinositide interacting 1	425.129	2.11621	2.52937e-50
ENSG00000087586	6790	AURKA	aurora kinase A	1245.27	-1.94071	4.18116e-50
ENSG00000111602	8914	TIMELESS	timeless circadian clock	863.008	-1.70237	4.22606e-50
ENSG00000134684	8565	YARS	tyrosyl-tRNA synthetase	2796.6	1.52816	6.1065e-50
ENSG00000186480	3638	INSIG1	insulin induced gene 1	1710.05	-1.3106	7.46626e-50
ENSG00000167996	2495	FTH1	ferritin heavy chain 1	5710.16	1.8456	7.61983e-50
ENSG00000197256	25959	KANK2	KN motif and ankyrin repeat domains 2	907.001	-1.62975	8.48207e-50
ENSG00000100196	11015	KDELR3	KDEL endoplasmic reticulum protein retention receptor 3	772.22	1.39121	1.31181e-49
ENSG00000124207	1434	CSE1L	chromosome segregation 1 like	3320.45	-1.15145	1.36742e-49
ENSG00000157851	56896	DPYSL5	dihydropyrimidinase like 5	420.163	-1.8518	1.51043e-49
ENSG00000135842	116496	FAM129A	family with sequence similarity 129 member A	4818.11	1.35545	3.44999e-49
ENSG00000162496	9249	DHRS3	dehydrogenase/reductase 3	304.379	-2.6469	4.5415e-49
ENSG00000140534	90381	TICRR	TOPBP1 interacting checkpoint and replication regulator	408.451	-1.78889	6.15517e-49
ENSG00000146670	113130	CDCA5	cell division cycle associated 5	660.401	-1.88596	7.81753e-49
ENSG00000100242	25777	SUN2	Sad1 and UNC84 domain containing 2	953.842	-1.22326	8.27855e-49
ENSG00000197860	54557	SGTB	small glutamine rich tetratricopeptide repeat containing beta	490.589	2.0521	1.53744e-48
ENSG00000067715	6857	SYT1	synaptotagmin 1	436.273	2.36441	1.61326e-48
ENSG00000168496	2237	FEN1	flap structure-specific endonuclease 1	1007.72	-1.63612	1.91378e-48
ENSG00000149177	5795	PTPRJ	protein tyrosine phosphatase, receptor type J	1626.46	-1.50032	2.80303e-48
ENSG00000154122	56172	ANKH	ANKH inorganic pyrophosphate transport regulator	2193.91	-1.37612	2.87211e-48
ENSG00000012171	7869	SEMA3B	semaphorin 3B	410.36	1.76496	3.45521e-48
ENSG00000198053	140885	SIRPA	signal regulatory protein alpha	1228.83	-1.61584	3.49751e-48
ENSG00000166801	63901	FAM111A	family with sequence similarity 111 member A	596.941	-1.70842	3.80267e-48
ENSG00000115159	2820	GPD2	glycerol-3-phosphate dehydrogenase 2	1543.23	-1.14395	3.92296e-48
ENSG00000176619	84823	LMNB2	lamin B2	3550.6	-1.352	4.12091e-48
ENSG00000221968	3995	FADS3	fatty acid desaturase 3	661.248	1.56441	4.15847e-48
ENSG00000067955	865	CBFB	core-binding factor beta subunit	1631.71	-1.04062	4.93601e-48
ENSG00000136240	11014	KDELR2	KDEL endoplasmic reticulum protein retention receptor 2	8897.55	0.988052	5.43088e-48
ENSG00000146411	154091	SLC2A12	solute carrier family 2 member 12	194.465	-3.80917	5.48367e-48
ENSG00000164754	5885	RAD21	RAD21 cohesin complex component	2933.98	-1.06429	6.1716e-48
ENSG00000276043	29128	UHRF1	ubiquitin like with PHD and ring finger domains 1	699.641	-1.97246	6.57307e-48
ENSG00000136235	10457	GPNMB	glycoprotein nmb	1198.95	1.60721	7.06616e-48
ENSG00000169992	57555	NLGN2	neuroligin 2	630.034	-1.35981	7.44831e-48
ENSG00000171867	5621	PRNP	prion protein	6356.41	1.0092	8.90642e-48
ENSG00000119729	23433	RHOQ	ras homolog family member Q	862.917	1.26796	1.02455e-47
ENSG00000077232	54431	DNAJC10	DnaJ heat shock protein family (Hsp40) member C10	2685.61	1.27204	1.13926e-47
ENSG00000164611	9232	PTTG1	pituitary tumor-transforming 1	1197.19	-1.92983	1.32371e-47
ENSG00000140961	29948	OSGIN1	oxidative stress induced growth inhibitor 1	321.384	2.40235	1.36118e-47
ENSG00000185361	126282	TNFAIP8L1	TNF alpha induced protein 8 like 1	347.987	-1.93593	1.41328e-47
ENSG00000148411	138151	NACC2	NACC family member 2	1875.7	-1.34295	1.49329e-47
ENSG00000150961	9871	SEC24D	SEC24 homolog D, COPII coat complex component	2220.36	1.36425	1.77703e-47
ENSG00000165732	9188	DDX21	DExD-box helicase 21	4651.65	1.00393	2.07281e-47
ENSG00000085063	966	CD59	CD59 molecule (CD59 blood group)	4089.94	-1.15257	2.13878e-47
ENSG00000103257	8140	SLC7A5	solute carrier family 7 member 5	8381.52	1.3827	2.70616e-47
ENSG00000139291	55266	TMEM19	transmembrane protein 19	424.471	-1.64177	4.20416e-47
ENSG00000145740	64924	SLC30A5	solute carrier family 30 member 5	1631.03	1.01573	4.49755e-47
ENSG00000105968	94239	H2AFV	H2A histone family member V	4261.8	-1.23877	4.91718e-47
ENSG00000055118	3757	KCNH2	potassium voltage-gated channel subfamily H member 2	225.906	-2.84742	5.0597e-47
ENSG00000188229	10383	TUBB4B	tubulin beta 4B class IVb	4120.61	-1.30874	1.00723e-46
ENSG00000021300	58473	PLEKHB1	pleckstrin homology domain containing B1	216.375	-2.74759	1.04465e-46
ENSG00000171873	146	ADRA1D	adrenoceptor alpha 1D	873.439	-1.78768	1.1328e-46
ENSG00000121060	7706	TRIM25	tripartite motif containing 25	1472.2	1.39307	1.2738e-46
ENSG00000125885	84515	MCM8	minichromosome maintenance 8 homologous recombination repair factor	737.532	-1.56811	1.27448e-46
ENSG00000122786	800	CALD1	caldesmon 1	3778.92	-1.40276	1.30024e-46
ENSG00000115738	3398	ID2	inhibitor of DNA binding 2, HLH protein	668.898	-1.40482	1.81063e-46
ENSG00000136986	79139	DERL1	derlin 1	1150.73	1.20517	1.89322e-46
ENSG00000198363	444	ASPH	aspartate beta-hydroxylase	4546.35	1.33697	2.23176e-46
ENSG00000185697	4603	MYBL1	MYB proto-oncogene like 1	489.592	-1.50784	2.6867e-46
ENSG00000121621	81930	KIF18A	kinesin family member 18A	492.695	-1.5402	2.92492e-46
ENSG00000165891	144455	E2F7	E2F transcription factor 7	1030.92	1.74892	3.06145e-46
ENSG00000127564	9088	PKMYT1	protein kinase, membrane associated tyrosine/threonine 1	306.827	-2.43902	3.14407e-46
ENSG00000104980	10469	TIMM44	translocase of inner mitochondrial membrane 44	745.966	1.23592	3.79944e-46
ENSG00000141458	4864	NPC1	NPC intracellular cholesterol transporter 1	654.734	1.60983	4.1503e-46
ENSG00000118217	22926	ATF6	activating transcription factor 6	1696.35	1.13312	4.46368e-46
ENSG00000158560	1780	DYNC1I1	dynein cytoplasmic 1 intermediate chain 1	756.892	-1.33438	4.66005e-46
ENSG00000153044	64946	CENPH	centromere protein H	585.795	-1.78857	5.54548e-46
ENSG00000132383	6117	RPA1	replication protein A1	2526.71	-1.47879	5.71043e-46
ENSG00000064961	10362	HMG20B	high mobility group 20B	1087.14	-1.33316	5.76444e-46
ENSG00000276644	1602	DACH1	dachshund family transcription factor 1	282.653	-2.12774	5.77605e-46
ENSG00000151503	23310	NCAPD3	non-SMC condensin II complex subunit D3	1223.49	-1.36109	6.60405e-46
[truncated: 2,319 more rows]
